# Supplementary material
Source: publisher figshare collection journal article supplement (https://acs.figshare.com/ndownloader/files/20471283)
Supplement: Supplementary file 1 [file 20471283]

## Sheet: pos-all-identification
Table S1. Identification of 7,571 positive lipid features in primary LC-MS profile under the positive ion scan mode.
ID	name	MZ	RT	176-1-1	176-1-2	176-1-3	176-2-1	176-2-2	176-2-3	176-3-1	176-3-2	176-3-3	176-4-1	176-4-2	176-4-3	176-5-1	176-5-2	176-5-3	176-6-1	176-6-2	176-6-3	1970-01-01	1970-01-02	1970-01-03	1970-02-01	1970-02-02	1970-02-03	1970-03-01	1970-03-02	1970-03-03	1970-04-01	1970-04-02	1970-04-03	1970-05-01	1970-05-02	1970-05-03	1970-06-01	1970-06-02	1970-06-03	CAMERAisotopes	CAMERAadductIon	CAMERApcgroup	IsAnnotated	IsMS2ident	MS2Metabolite	MS2superclass	MS2class	MS2lipidmaps	MS2lipidmapsclass
1	M201T1000	200.952	16.6588	2222.08	1782.11	2507.5	3663.99	2292.33	2996.89	3723.29	2638.23	3138.53	1547.54	1751.17	2442.21	2326.59	2101.22	3008.54	2897.55	2372.52	2585.31	4061.2	2106.71	3141.16	2710.11	2721.96	2792.42	4213.52	3371.49	3128.83	2053.87	3590.74	872.856	1581.34	2419.02	2609.66	3759.56	2790.03	2493.16	-	-	4779	0	0	-	-	-	-	-
2	M201T44	201.138	0.733042	3168.52	2349.83	3152.96	2788.68	2308.88	1661.78	792.567	1362.04	744.429	898.922	642.368	546.312	700.644	1109.2	899.395	833.154	506.985	818.682	581.319	995.814	560.225	1948.91	1522.67	960.345	1162.03	1105.4	814.385	736.482	1089.66	909.836	734.613	849.631	891.268	1610.7	1158.15	1702.74	-	-	3820	1	0	-	-	-	-	-
3	M201T336	201.148	5.59652	2088.04	2392.74	1842.21	2306.88	2527.36	1567.47	3849.42	2499.14	2394.54	5274.21	4636.92	2592.86	7222.29	5182.14	4308.95	6344.81	5851.36	5311.73	1268	1408.14	1586.22	10478.5	13692.2	11327	4396.69	7498.51	11189.3	1823.59	1623.73	1630.6	2367.42	1634.85	1379.17	1328.05	1627.17	1437.55	-	[M+H]+ 200.146	169	0	0	-	-	-	-	-
4	M201T60	201.148	1.00644	722.34	1443.88	609.106	695.258	852.654	820.109	747.336	1312.31	769.135	1385.08	1004.26	873.159	1224.32	1248.71	1568.91	1029.09	1292.12	1018.2	857.134	742.26	575.436	535.183	780.973	649.302	1067.71	703.502	2195.21	1328.11	966.144	1124.49	885.421	874.162	683.055	1101.76	1424.73	632.342	-	-	519	0	0	-	-	-	-	-
5	M202T45	202.086	0.74315	10697.1	9894.38	11570.9	26346.9	24592.2	33438.4	15005.1	9699.16	11608.1	12823.3	7238.21	5554.89	10977.8	7243.08	5061.96	11598.2	6145.87	5962	8471.8	8050.22	8723.54	14768.9	10069.5	12478.1	11454.9	8358.1	9614.39	10281.9	8579.39	8400.31	9495.55	9196.76	10840.4	8429.87	5785.55	7361.39	[1][M]+	-	3816	1	0	-	-	-	-	-
6	M203T41	203.052	0.685267	2080.08	1717.28	2244.86	3968.92	1506.28	978.075	2297.65	2106.25	2685.82	1435.91	749.279	1275.74	929.982	2818.65	1700.81	2965.04	705.345	1071.73	1498.27	982.402	1445.49	3774.91	2247.39	1358.93	883.701	1624.15	2836.41	1054.47	602.018	1063.32	1006.48	1197.96	887.271	1507.87	1373.58	2057.97	-	-	2477	1	0	-	-	-	-	-
7	M203T45	203.089	0.743533	2112.43	1931.76	3422.55	4092.05	3824.44	5308.93	2449.02	3358.8	2339.83	2175.58	1313.46	1159.3	1914.05	1099.43	782.298	1895.29	1149.19	903.845	1424.86	1417.05	1724.21	2854.57	1942.97	1959.92	1674.38	1217.87	1707.3	1643.43	1527.87	1422.53	1713.08	1477.35	1750.52	1456.49	2299.83	1871.68	[1][M+1]+	-	3811	0	0	-	-	-	-	-
8	M205T1017	204.912	16.946	768.416	1204.92	858.186	1982.19	1270.37	1702.11	996.735	1232.1	1339.15	957.647	1456.79	1495.74	917.28	1231.56	1506.37	1054.91	1564.78	1332.43	1676.27	1325.34	1064.94	1443.69	1581.92	915.802	1416.12	2423.52	1489.04	446.292	1348.83	1204.62	1822.65	2055.54	1442.97	1157.78	1060.89	1354.76	-	-	562	0	0	-	-	-	-	-
9	M207T41	207.206	0.685967	5301.83	4021.91	4894.26	3741.18	5562.95	6131.06	3491.79	4262.55	2665.81	4193.81	2689.49	2489.95	6439.05	2150.25	7236.12	2500.25	2717.71	3669.73	4738.65	4590	5336.99	3014.53	2798.22	4434.01	6503.08	5635.25	3660.86	3327.69	4606.81	3142.43	4017.13	4237.16	4640.3	4998.06	2840.66	4758.29	-	-	2478	0	0	-	-	-	-	-
10	M209T48	209.08	0.801583	1799.86	4749.71	3904.86	2734.7	3425.23	3990.95	2099.03	506.051	1835.02	2070.15	1342.72	1094.5	1479.26	519.932	1785.69	667.63	1107.49	1000.87	2517.49	2530.56	2004	3008.07	2820.43	2864.12	2267.19	2268.27	2300.42	999.485	1951.83	1760.22	1464.26	1364.3	1496.59	1041.25	1758.69	1232.06	-	-	471	1	0	-	-	-	-	-
11	M209T46	209.117	0.77255	5819.68	6774.17	6333.56	3965.06	3683.63	3592.2	1373.53	2925.87	2439.56	1022.08	1692.86	982.252	2154.73	1207.4	1597.47	1048.52	1180.23	1373.43	1770.56	1543.98	1420.05	2017.95	6444.99	4429.01	3964.6	4299.07	5371.96	544.369	2641.31	2002.81	2437.6	1084.85	1151.79	2483.55	2542.7	1255.91	-	-	4032	1	0	-	-	-	-	-
12	M209T207	209.153	3.44358	2359.57	3716.33	2322.79	2849.22	3380.83	2565.51	3319.1	3473.24	2220.38	2852.23	1898.7	2175.56	3535.31	2285.85	2049.65	2813.77	1678.65	1830.14	5527.93	4522.01	5146.37	4349.95	7744.25	2726.18	7080.71	4743.56	2889.09	4171.45	3839.56	4559.07	6028.35	5299.25	6290.73	4722.77	4864.98	4029.64	-	-	2921	1	0	-	-	-	-	-
13	M210T44	210.052	0.729667	687.691	1600.69	2053.26	467.764	1026.19	1120.37	993.634	1304	1467.81	904.8	438.322	644.667	689.724	695.398	494.089	1140.19	509.227	783.355	986.711	930.616	789.248	1342.06	1469.79	587.339	467.174	831.521	1106.54	773.081	741.802	593.797	1051.87	1014.06	931.569	757.714	1200	921.014	-	-	4572	1	0	-	-	-	-	-
14	M211T46	211.096	0.760692	16828.5	16781.2	17476.5	8021.61	13264.1	16091.3	1005.21	2666.28	884.066	1018.72	1132.7	1116.24	1050.76	1229.95	1040.34	1087.66	978.832	1424.48	1284.67	1287.05	1490.13	2003.04	1357.51	1412.83	811.071	1327.77	701.92	1018.89	1194.79	1364.11	932.16	1200.62	1324.03	986.029	1542.65	1602.78	-	-	4706	1	0	-	-	-	-	-
15	M211T48	211.132	0.801	4051.82	3228.43	2764.55	3254.19	1141.88	2051.01	939.264	942.121	1834.72	1261.07	1226.98	1301.01	1228.39	1836.56	1017.81	975.904	844.971	840.792	1524.63	1711.95	1755.21	1165.03	707.417	1160.23	1374.92	610.672	1196.38	1868.53	891.862	889.889	703.674	1711.34	1626.33	1511.82	1380.39	788.563	-	-	4790	1	0	-	-	-	-	-
16	M212T47	212.118	0.775308	30725.6	30123	29896.8	29302.3	31333.3	28276	39485.6	24289.1	19703	19445.6	58921.1	19697.3	17289.3	18814.1	22865	42029.8	22271.4	58737.7	50765.4	47614.8	48333.1	44146.9	36964.9	34430.6	33687.8	32882.1	53880.7	30599	40481	38215.7	28636.7	28286.3	30001.1	83014.2	52193.5	28274.8	[2][M]+	-	4025	1	0	-	-	-	-	-
17	M213T47	213.121	0.775958	14876.7	13502.8	15265.4	8727.67	13482.9	15645.1	6235.08	5447.24	4104.81	3896.53	10688	3719.87	3360.58	4504.51	4230.08	7135.34	4308.95	10587.5	8902.83	8282.81	9067.3	7552.92	6611.94	6667.9	6228.58	6797.12	9139.75	5692.23	6834.44	6127.48	5347.2	5438.51	6386.7	13755.4	9245.9	6221.84	[2][M+1]+	-	4028	0	0	-	-	-	-	-
18	M213T62	213.148	1.02988	9613.46	10546.3	9232.26	7201.91	8862.97	8505.86	1510.98	1321.45	1365.12	1455.33	1231.75	1378.14	1190.92	1449.4	1743.74	1430.91	1118.02	1412.33	1857.23	1194.3	1847	3171.38	1852.05	1232.62	2834.45	2310.53	1618.76	2648.89	1294.98	2324.05	1344.25	1590.94	1505.39	1412.53	1601.88	980.62	-	-	341	1	0	-	-	-	-	-
19	M219T74	219.047	1.22677	3082.74	2779.17	3209.63	2940.08	2698.42	2924.71	3076.76	3525.3	3183.07	3125.18	3127.33	3752.78	3043.81	3818.71	3130.6	3390.99	3738.47	3301.36	2728.05	3149.5	2706.47	3493.27	3645.74	3425.16	1698.65	2840.55	3931.28	2869.55	3515.54	2589.33	3233.26	3457.71	3147.35	2928.18	3156.04	3115.31	-	[M+K]+ 180.084 [M+Na]+ 196.058 [M+H]+ 218.04	507	1	0	-	-	-	-	-
20	M219T47	219.101	0.790717	8294.65	8450.19	7010.19	3605.38	6296.86	5779.76	1023.07	1641.48	809.812	716.85	926.704	970.179	792.134	931.5	642.695	1023.17	709.461	849.276	779.295	645.29	935.611	656.053	1872.59	2132.87	1218.39	906.696	951.472	832.316	1001.32	539.883	1184.83	731.087	963.843	994.349	720.36	764.829	-	-	4791	1	0	-	-	-	-	-
21	M219T282	219.21	4.70453	2772.8	2366.22	2567.98	2365.31	1264.01	2431.3	1272.61	2413.64	1316.81	2648.25	1737.99	2424.79	1746.35	964.543	2508.21	1383.82	1129.21	1352.11	2175.56	2373.02	2366.6	2520.47	3366.47	2906.79	1875.23	1909.69	2950.91	2573.82	1741.06	2009.33	1424.45	3234.32	1891.09	2703.69	1935.02	1299.81	-	-	4299	1	0	-	-	-	-	-
22	M221T176	221.116	2.94103	988.96	830.743	835.145	775.998	1009.42	745.958	702.888	919.856	557.015	1314.58	946.79	993.732	1266.99	1302.29	1251.9	1241.62	1342.27	1107.79	810.299	788.956	1014.83	912.859	1112.28	923.279	1014.68	971.089	558.906	1099.48	801.876	1128.14	530.4	977.321	948.274	897.069	1035.78	829.806	-	-	561	1	0	-	-	-	-	-
23	M221T324	221.175	5.40608	952.489	1624.62	1595.18	1499	1365.31	1515.09	1647.36	1550.68	1117.36	1902.68	1153.92	943.961	1582.15	1258.68	1942.42	1987.25	1535.82	1398.1	1459.79	2066.79	1549.36	1659.3	1662.09	866.985	1514.63	965.976	1976.98	1750.86	1758.04	1709.47	2245.53	1391.21	1361.95	1026.7	2057.81	1064.49	-	-	3915	1	0	-	-	-	-	-
24	M223T207	223.169	3.44223	2352.48	2787.84	2016.31	2417.69	2172.36	2569.16	2166.19	2059.96	2493.81	1707.03	2024.58	2008.54	2061.88	1895.19	1619.1	2319.61	1796.14	1694.05	5449.25	4089.52	4963.44	2343.75	2777.74	2639.7	5672.1	4268.73	1489.39	4338.71	4471.9	2584.54	6811.03	6349.46	7564.97	3054.54	3440.32	2276.69	-	-	2929	1	0	-	-	-	-	-
25	M223T233	223.205	3.8799	1840.65	3091.86	1379.34	943.335	3126.04	1425.76	3419.74	2367.62	1525.07	5051.12	3579.98	1810.74	8883.39	5852.91	5269.03	3715.01	7052.8	4613.7	2236.13	2294.66	4143.38	2312.32	2374.77	3084.76	3750.31	3852.19	2240.7	1197.54	1408.58	1376.21	2613.2	4263.33	2829.69	1272.4	3279.93	4289.08	-	-	501	1	0	-	-	-	-	-
26	M226T44	226.026	0.728642	265.056	447.102	758.018	445.175	325.575	507.451	1462.08	2213.83	2845.36	1146.93	246.289	422.999	1171.14	1369.94	807.788	1105.26	290.489	520.117	1506.4	1437.73	1619.96	2358.88	2908.03	841.363	828.004	1472.23	1041.72	549.125	866.8	576.292	931.67	781.563	904.274	1084.91	1153.67	936.344	-	-	4573	1	0	-	-	-	-	-
27	M227T996	226.951	16.5987	56565.4	61709.4	61888.5	59634.5	66570	78879.5	79466.2	60839.2	65042	53448.1	66909	65942.3	46213	58815.1	57299.8	53646.6	56659.6	58743.6	64020.7	84422.6	61735.3	69995.2	56631.1	53356.4	56843.6	55754.7	49218.9	53877	66597.3	53284.3	57334.6	52226.5	79216.6	56934.3	51624.1	56121.6	-	-	441	1	0	-	-	-	-	-
28	M227T164	227.064	2.7305	1187.31	882.413	891.78	1159.63	798.779	1303.67	1052.36	819.811	1336.33	1332.43	1585.1	1144.92	1380.93	1394.86	988.591	1006.27	1425.87	1333.12	1592.6	1455.76	1683.16	808.065	1197.99	1043.3	986.475	973.929	1352.71	1051.08	1208.63	1115.09	1354.32	996.405	1040.18	2508.22	1161.87	1041.86	-	-	555	0	0	-	-	-	-	-
29	M229T998	229.122	16.6297	7814.6	27402.7	26251.9	27764.9	25073.9	25717.4	28559.7	26775.5	26279.7	29073.6	23757.4	32133.3	7924.28	8553.4	47228.2	31965.6	36091.2	25645	19056.4	26376.4	42953.7	25434.3	30268.8	28592.7	38950.7	13000.7	27951	22707.1	26010.5	31672.4	24709.9	26219.5	26435.4	7509.6	21796.1	26755.6	-	-	4711	1	0	-	-	-	-	-
30	M229T42	229.154	0.700583	3335.9	3351.48	3454.25	2102.61	2724.6	1970.24	3962.86	4803.34	5076.25	1326.95	598.787	908.374	2145.57	2806.63	1563.07	2193.92	503.311	2144.67	2277.11	1665.06	2391.78	6816.4	6147.36	1398.23	1990.12	2382.32	2643.44	2268.07	892.658	2024.75	1694.4	1220.57	2227.01	2032.22	2513.2	1886.36	-	-	4803	1	0	-	-	-	-	-
31	M229T367	229.179	6.11203	1957.51	2776.78	2779.52	2699.23	1993.42	6722.55	3114.72	1833.78	1273.99	3274.86	2706.79	1968.64	4486.93	3093.49	3195.17	4502.55	3909.02	2878.34	4335.34	4205.81	614.514	8216.5	11397.5	6376.4	2751.39	3724.63	7070.43	3065.98	1209.12	1014.06	1039.61	4433.98	1258.95	1279.04	1844.37	3681.54	-	-	3460	0	0	-	-	-	-	-
32	M233T1010	232.907	16.8362	721.453	996.037	661.453	974.579	545.641	1773.37	693.347	852.814	1332.13	796.759	772.188	902.915	1009.75	1067.41	988.494	1941.52	922.316	844.703	1283.68	668.412	868.535	758.717	779.538	1007.6	988.523	1008.57	405.68	782.18	517.725	1058.01	976.423	694.547	941.738	1044.03	787.335	600.297	-	-	565	0	0	-	-	-	-	-
33	M235T1020	234.917	16.9932	1114.96	1053.99	909.192	1051.66	1106.5	1954.43	1094.2	965.395	1058.32	1342	1346	1583.65	1330.63	1063.6	1627.01	685.612	1663.56	1450.13	2675.59	1495.24	1867.34	1508.32	1233.08	1320.26	1663.2	2506.55	941.29	963.637	1093.96	1133.33	1363.84	1005.02	700.245	1172.16	1133.6	1139.62	-	-	564	0	0	-	-	-	-	-
34	M235T61	235.131	1.02229	979.996	1209.87	941.311	630.691	1584.97	802.222	671.244	1144.01	678.587	838.151	661.905	604.273	693.883	782.958	822.144	601.987	774.416	705.212	1186.66	1381.21	1214.1	1531.78	1535.7	1001.04	3415.94	1569.2	1081.77	798.914	906.391	1182.7	2069.25	835.557	896.704	1608.87	853.988	711.107	-	-	545	1	0	-	-	-	-	-
35	M236T74	236.073	1.23234	1425.96	1276.33	1162.05	1122.05	1225.59	1334.17	2094.52	1693.59	1501.24	948.312	1313.3	1506.02	1298.92	1750.9	1480.29	2833.69	1335.73	1303.47	1292.49	1588.36	1209.67	1363.43	1654.52	1558.13	897.102	1012.96	1554.08	1440	1389.08	1257.04	1450.61	1808.28	1351.71	2156.07	3415.84	1466.82	-	[M+K+NH3]+ 180.084 [M+Na+NH3]+ 196.058 [M+H+NH3]+ 218.04	507	1	0	-	-	-	-	-
36	M237T206	237.185	3.43448	5715.61	5937.41	6466.35	2256.52	2823.22	2682.06	3160.28	2589.9	2147.02	2848.43	2364.22	2321.17	3641.24	2658.07	2610.4	2606.01	2049.5	2046.92	1674.75	2130.28	4665.11	3158.91	4138.14	1939.17	4836.79	2383.27	3145.84	2634.99	2523.11	2884.71	2031.75	3626.44	3533.94	2653.79	4445.95	3264.63	-	-	2914	1	0	-	-	-	-	-
37	M237T282	237.221	4.70117	2819.91	3775.91	4055.13	5727.4	2858.41	3925.93	7169.22	1610.59	2609.09	4996.65	3999.83	3839.45	6257.15	2914.01	4724.17	3130.5	3831.11	4444.8	5640.12	5098.68	5848.01	6027.74	6975.76	6253.76	6653	5220.16	5841.57	4513.14	4552.71	6351.54	5589.03	4399.78	5406.19	3075.25	6932.16	4086.61	-	-	4300	1	0	-	-	-	-	-
38	M241T1002	241.003	16.7028	1651.64	2420.73	2452.3	1461.66	2453.64	2186.85	3516.13	2006.95	2947.93	2782.15	2893.4	1367.29	2749.05	2864.57	2715.33	2064.76	2026.35	1562.01	3647.91	2263.96	3031.5	2248.56	2146.77	1488.48	3674.59	2030.76	1980.03	2889.43	2766.41	2247.54	1470.57	1409.26	988.091	1629.68	1327.23	1945.96	-	-	552	1	0	-	-	-	-	-
39	M241T41	241.154	0.688167	4069.92	3334.58	3911.48	1452.14	2226.55	1800.69	2192.28	2624.22	2185.36	1310.39	622.656	481.473	1312.95	2357.99	1551	1325.11	1018.14	1353.31	915.293	1478.96	1015.04	4677.68	3600.97	1492.71	1664.4	1611.93	2816.94	1060.47	958.865	886.696	966.014	1234.15	880.6	1919.45	2778.52	1825.44	-	-	2479	1	0	-	-	-	-	-
40	M241T353	241.179	5.88115	3402.68	7061.66	3623.88	4615.5	6556.24	4860.99	5465.5	10989.5	6511.18	8863.21	4510.97	5397.06	6111.21	4876.43	4718.59	4780.05	4268.75	4736.56	5932.3	3783.88	7103.2	4750.21	8100.3	5631.69	4587.23	3348.31	5477.67	3353.52	3557.97	6330.57	3204.15	5611.44	4989.57	5502.68	5034.39	4318.15	-	-	3580	1	0	-	-	-	-	-
41	M241T386	241.216	6.4333	3078.44	2219.75	1707.35	2103.17	2629.76	3050.26	2482.7	2413.79	2297.27	2346.13	2372.5	2175.89	1630.54	2424.6	723.076	1923.96	2621.87	2349.47	2218.04	2756.42	3477.43	3413.7	2726.85	4174.99	2964.41	2848.19	4328.81	2970.75	3781.11	2942.72	2968.84	2795.35	2164.81	2088.62	2522.94	2505.21	-	-	2895	1	0	-	-	-	-	-
42	M242T68	242.211	1.13037	919.883	1032.03	866.441	755.603	975.346	1207.18	876.536	1416.47	777.042	845.726	889.837	768.732	986.105	953.22	805.122	738.189	840.356	789.847	1192.46	844.589	903.318	678.284	1099.47	990.267	1268.32	1256.24	1227.4	836.567	927.858	1047.78	761.77	707.443	520.97	802.444	917.873	918.076	-	-	517	0	0	-	-	-	-	-
43	M243T998	242.925	16.6363	2690.69	3036.76	2497.96	2406.15	2643.92	1850.99	1552.96	2513.36	1780.9	2227.8	993.6	1849.1	2225.87	3197.7	2226.05	2457.1	3287.86	1543.12	2642.42	1146.1	3276.06	2202.23	2607.4	1487.86	2175.66	3274.81	2447.85	2168.07	3434.76	3432.35	2676.69	1591.08	1806.95	1481.36	2341.2	2688.59	-	-	508	0	0	-	-	-	-	-
44	M243T42	243.098	0.700467	1590.17	1749.55	1222.18	938.542	918.874	1006.85	1756.18	2135.8	1754.96	956.181	735.855	703.68	765.227	1322.14	1335.66	791.432	513.87	643.833	848.399	643.997	1056.92	1169.07	1886.69	683.084	1079.68	1204.97	1170.69	863.731	777.219	719.811	732.194	634.149	653.005	768.89	1052.62	876.315	-	-	4804	1	0	-	-	-	-	-
45	M243T48	243.159	0.805617	2836.56	3378.14	3071.46	1954.99	1970.4	2750.25	976.546	972.146	1082.63	895.599	897.004	829.547	981.944	1070.83	750.783	908.032	725.318	1072.76	1053.35	1219.45	910.245	1209.13	1323.26	1433.04	787.14	918.579	1023.35	956.87	948.585	729.472	774.464	1342.18	783.061	1047.44	755.363	652.957	-	-	456	1	0	-	-	-	-	-
46	M243T41	243.183	0.68515	3157.07	3048.93	3177.75	2944.84	1893.53	4047.5	1034.75	1272.48	1244.46	2271.58	2631.8	1408.2	1980.81	1969.71	3307.38	1967.79	2246.16	2128.31	4392.22	5260.73	4473.18	1377.55	1016.08	3396.98	4583.16	2075.16	1864.91	3608.17	3032.89	4015.21	4276.07	4341.87	4560.92	4295.5	742.141	3061.14	-	-	2480	1	0	-	-	-	-	-
47	M243T208	243.21	3.46808	2281.08	2646.03	2305.89	3683.58	1988.98	2509.51	2678.87	3021.22	3175.29	1925.03	2057.74	1973.37	2276.37	1690.51	2313.72	3204.99	1404.14	1605.9	8935.92	9911.76	9512	6994.95	6137.57	3923.1	9643.89	7451.81	5996.1	8449.15	9519.71	5647.84	13766.4	16082.8	14863.4	8135.32	9095.79	6147.98	-	-	3950	0	0	-	-	-	-	-
48	M243T67	243.207	1.12135	563.776	708.93	583.632	885.236	907.898	752.432	1045.47	652.39	912.758	775.602	673.784	1035.89	1162.48	1067.23	1236.67	791.816	818.403	1469.97	994.603	913.027	827.567	978.395	1352.07	1361.49	1185.23	989.393	1116.51	498.895	835.38	948.534	650.402	909.939	1184.91	970.515	950.355	864.238	-	-	4427	0	0	-	-	-	-	-
49	M244T60	244.096	0.997175	880.2	1324.8	1148.46	1461.52	446.789	533.023	787.567	1128.38	891.395	1070.91	587.611	455.453	650.659	823.634	494.875	687.752	557.784	511.772	823.217	782.339	838.178	1305.05	1283.93	1668.6	1075.62	1102.4	1296.95	798.914	932.771	832.541	613.053	782.34	952.65	529.282	558.536	380.265	-	-	4874	1	0	-	-	-	-	-
50	M245T290	245.226	4.82937	90459.1	86424.1	76488.3	42673.4	47974.7	66800.8	5033.42	3630.06	3800.75	5382.1	5145.28	3827.86	3149.97	3004.78	4421.29	2760.6	3497.55	3585.61	30351.1	30000.2	30816.9	47284.7	53732.2	56896.2	30812.8	37465.4	45344.8	27160.7	24561.1	34341.4	28105.4	27892.5	34116.1	20405.8	13640.3	17532.2	-	-	1548	0	0	-	-	-	-	-
51	M246T290	246.23	4.84072	20689.2	21800.6	22387.1	9364.25	10602.3	13912.9	1133.02	1493.49	811.207	1420.64	1236.75	739.607	1024.57	940.789	1018.33	773.347	596.748	1212.56	7768.18	6939.95	6235.37	11029.4	13107.2	13569.6	10271.7	9643.72	11521.6	5463.29	5125.72	7234.28	5543.87	7656.22	9915.95	3625.31	3571.3	4947.07	-	-	1550	0	0	-	-	-	-	-
52	M247T44	247.144	0.729875	17487.6	15564.8	22547	42077.3	31441.6	28627.8	71286	71133.2	100286	47209.7	24088.7	26207.9	68717.4	66963.2	43205.4	72768.2	33332.7	38153.3	82064.9	79859.4	80868.9	98873.5	73887.2	52785.8	72736.2	81519.9	58035.6	56589.2	75744	43005.6	66156	63966.9	65118.1	62059.6	76528.1	49662.2	[3][M]+	-	3815	1	0	-	-	-	-	-
53	M247T310	247.242	5.16478	7761.92	9255.64	7041.96	17452.4	14440.9	14062.4	14334.4	15685.3	17707.5	16030.3	17951.2	13053	17444.3	8616.01	11491	15733.7	13168.8	9263.32	11373.2	17140.9	15044.8	16857.2	15708.6	21754.3	16768.3	9523.03	13391.8	11199.5	12535.5	11520.5	8677.92	9385.06	10723.9	7466.72	11586.3	8210.16	-	-	1442	1	0	-	-	-	-	-
54	M248T44	248.147	0.729933	3801.37	3664.19	3545.41	7467.58	6251.19	5907.74	12350	13531.9	19891.8	9895	4857.55	4569.96	11490.3	12259.9	7453.99	13937.5	6406.38	7383.1	15244.9	13017.8	14644.1	18936.8	14716.6	8584.61	13024.5	15148.8	12273.2	10038.2	13339.3	8300.81	12425.5	11401.1	12300.2	11353.9	14320.7	9372.83	[3][M+1]+	-	3812	1	0	-	-	-	-	-
55	M249T46	249.111	0.772717	6726.05	6929.36	7284.69	4396.1	6569.22	3874.37	1241.9	1022.62	948.842	1106.58	802.414	738.838	800.201	1757.18	1581.9	762.893	864.933	844.317	1840.01	1684.97	1888.02	2113.47	2387.79	2566.77	1107.41	1966.08	2169.63	888.594	1498.61	1518.47	1370.62	1680.48	1361.41	907.318	1084.29	967.412	-	-	4024	1	0	-	-	-	-	-
56	M249T44	249.149	0.730567	6484.29	6809.52	1746.41	1202.25	6472.82	4160.88	1884.85	1499.85	2937.63	1004.51	631.797	1499.21	1830.2	1966.45	912.494	1980.73	1149.15	1544.92	2145.64	1757.6	2262.89	2872	1828.82	1467.28	2226.08	2091.72	1734.62	1219.88	1838.13	1377.77	1623.15	1689.17	1697.53	1625.19	1724.39	2345.66	[3][M+2]+	-	3813	1	0	-	-	-	-	-
57	M250T43	250.144	0.714692	283965	270048	292252	25537.2	40719	53351.6	4458.82	7104.26	5154.73	3508.1	4137.68	3765.89	2764.52	2260.6	4884.89	3023.79	1808.8	2968.88	3968.31	4268	3894.45	7911.95	6468.4	10025.6	7174.06	4562.11	7088.82	3582.2	3814.76	4531.08	3255.18	2815.62	3968.09	3530.22	3437.84	3861.74	[4][M]+	-	3217	1	0	-	-	-	-	-
58	M251T272	251.046	4.5363	21043.9	25084.4	21264.3	13526.2	8863.13	17544.8	9963.05	18518.7	10054.3	6936.36	7461.31	19493.5	27404.6	8934.07	14873.4	18206.4	10066.9	13001.9	11416	17086.4	11729.7	21083.5	23203.5	8818.79	6951.47	17936.9	13789.2	8174.98	11182	19962.4	15512.4	7293.5	10193.1	16405.8	12997.2	7455.82	-	-	849	1	0	-	-	-	-	-
59	M251T43	251.147	0.715317	45503.4	44392.2	50364.9	4218.87	6464.51	8076.62	1489.4	1902.93	1548.55	1154.55	749.803	889.603	977.063	1187.81	898.925	964.7	587.047	868.548	731.63	592.689	1158.32	2527.03	1835.88	2277.72	1601.58	1081.64	882.323	785.434	515.019	947.675	652.162	641.82	1052.51	709.509	1309.31	1691.35	[4][M+1]+	-	3225	1	0	-	-	-	-	-
60	M254T66	254.212	1.10818	944.176	1160.75	852.269	939.68	912.437	957.726	744.144	695.061	826.434	985.988	1138.92	975.156	944.369	787.904	1143.79	986.704	826.69	830.056	889.042	1428.8	521.06	1140.02	1020.83	559.557	1488.99	1223.15	1411.62	1057.1	1024.9	744.1	808.89	1066.46	797.471	1262.21	840.147	984.631	-	-	4416	1	0	-	-	-	-	-
61	M255T42	255.062	0.704883	621.632	3153.34	3439.42	704.278	2149.81	1124.04	1993.73	2120.42	1854.36	680.07	1186.37	594.394	1270.56	2643.57	1139.02	2235.71	1229.69	1281.91	1191.62	1098.4	1064.91	2280.34	561.058	1031.57	1331.33	1350.48	1495.5	848.072	899.989	1167.25	1139.53	1210.78	882.144	816.432	853.443	922.1	-	-	3211	1	0	-	-	-	-	-
62	M255T368	255.211	6.13638	11213.2	8404.2	9397.09	4513.49	6473.59	10212.1	2752.46	3389.06	1818.92	2065.7	1554.07	1687.55	1396.59	1416.12	1447.09	1931	1772.84	1705.73	2330.67	3169.58	2913.78	3295.37	3962.97	3876.11	3107.13	2726.17	2711.95	2096.84	2650.95	1539.74	1488.95	2529.53	2088.18	2040.25	1653.45	2108.27	-	-	3102	1	0	-	-	-	-	-
63	M255T613	255.21	10.216	16806.2	12669.9	13476.4	2443.07	4959.15	6350.27	2742.98	3596.71	2132.74	2076.74	3100.75	1176.33	2904.67	2118.66	4460.93	2940.1	1852.85	1190.96	3287.56	3259.05	3363.22	2315.31	1677.27	2324.02	1000.11	3083.88	1108.74	2399.21	1602.92	1403.85	1629.28	1739.02	1882.22	3233.01	1990.19	2248.35	-	-	2440	1	0	-	-	-	-	-
64	M255T282	255.232	4.70448	4389.51	3309.11	3501.85	9431.55	5500.55	7293.41	8648.18	7116.91	6698.03	10615.5	13790.5	8050.24	10281.9	8081.44	7952.95	6518.21	8545.47	8130.75	11179.9	13348.7	13363.9	14141.6	17229.7	16651	14921.5	12697.1	16948	10397.6	10474.8	11620.2	15173.3	12395.5	15294.6	10449.7	13902.3	10682.8	-	-	4298	1	0	-	-	-	-	-
65	M256T298	256.263	4.9745	65149.5	18998.9	40990.3	37675.4	45847.1	48105.2	21619.2	42340.8	35464.6	21828.3	31685.9	49171.7	17144.5	24352.4	23126.3	38610.5	29605.5	23900.4	25725	29544	23503.1	25953.9	22667.4	23645.4	26907.2	33789.3	32770.9	28752.9	30094.6	20333.9	20751.4	25356.6	26032	27122.7	21158	36314.9	[5][M]+	-	268	1	0	-	-	-	-	-
66	M256T270	256.263	4.496	15914.2	10667	13751.6	13354.1	28107	15346.5	15026.6	13975.3	10508.3	29139	19495.5	17505.4	24421.3	19542	20632.5	23978	21300.8	40003.5	13960.5	10862.7	16810.2	13662.5	22295.3	10663.7	16110.4	22589.6	19266	15981.8	17869	12820.9	15645	13430.5	14507.2	12553	19840.1	17287.8	-	-	3429	1	0	-	-	-	-	-
67	M257T336	257.211	5.59737	3160.54	3894.6	2176.25	3562.98	5292.14	3299.62	6137.18	4066.89	3424.08	7807.68	5866.13	4486.93	14043.6	6333.37	7080.34	9925.28	8846.6	8040.6	1831	1873.04	2226.14	17393.6	23352.3	17307.6	7546.58	12975	18440	1835.26	1556.14	2763.87	3267.81	1708.76	1831.32	3139.02	3178.57	2609.76	-	-	169	0	0	-	-	-	-	-
68	M257T402	257.211	6.69933	6226.94	10247.5	8450.25	7598.58	10324.1	6966.37	6652.7	3855.79	3178.75	6760.4	4665.11	6154.34	10826.3	7163.43	7575.51	10162.1	8350.44	7912.93	5062.14	3954.93	4918.94	23058.1	28945	22571.1	11072.1	13705.9	21195.8	2099.5	3009.19	4119.21	4151.62	3250.63	3348.7	4802.84	4698.96	3444.6	-	-	2755	0	0	-	-	-	-	-
69	M257T367	257.211	6.11395	3533.52	4106.96	4802.23	4265.43	3192.62	3155.03	2748.83	3085.12	3627.03	6103.46	3577.38	3321.48	6547.66	5509	3907.46	7324.45	6370.54	4800.37	2058.52	939.651	1447.64	9736.9	12748.2	8020.5	4558.79	5993	10728.9	1257.41	1916.92	1801.93	1523.69	1726.58	1603.42	2203.38	1921.2	2272.95	-	-	3466	0	0	-	-	-	-	-
70	M257T298	257.266	4.97447	5540.11	4851.62	5154.53	7137.4	8236.38	10356	5025.67	10233.4	8093.48	5674.78	5795.89	4126.03	3937.12	3535.71	5255.05	3652.29	5948.09	4064.58	9983.14	7080.99	9164.12	5359.74	4680.67	5339.8	9821.67	6368.72	11453.8	5077.74	6153.97	7012.55	6257.2	11088.1	6392.33	5891.5	10328.7	4616.85	[5][M+1]+	-	3860	0	0	-	-	-	-	-
71	M259T353	259.19	5.87825	9375.4	17551.4	10125.9	8474.48	11171.4	9320.63	13933.1	9770.29	9177.07	13878.2	10215.8	10184.4	10528.9	8356.08	9493.57	10200.3	7352.28	10322.3	8744.32	10603	15036.2	8858.85	13628.2	10011.1	11988.7	9837.66	8223.07	10594.4	8597.96	13142.5	8111.31	9749.19	9200.58	7430.57	10879.9	10139.7	-	-	3605	1	0	-	-	-	-	-
72	M260T352	260.193	5.87487	1780.16	2683.37	1230.08	2382.09	2570.87	2227.31	2288.76	1856.9	1521.84	2478.91	1327.34	2139.82	3239.12	2569.67	1807.43	2172.55	2100.51	2269.57	1089.6	1737.78	2246.37	1322.53	2665.97	2049.01	2208.57	1407.81	1097	2236.32	2273.92	1697.64	2279.13	1058.96	2075.68	1145.95	2424.12	1556.32	-	-	3588	0	0	-	-	-	-	-
73	M260T47	260.222	0.788017	2049.22	1395.9	1295.51	1038.02	1908.01	1694.08	726.399	372.822	716.152	718.883	413.866	482.515	582.854	421.962	646.519	622.357	340.006	486.939	1145.63	823.06	1368.82	921.661	954.046	826.59	806.811	1438.83	792.383	694.101	1619.15	1317.64	1661.04	1629.14	1848.17	880.261	1636.48	1474.7	-	-	4033	0	0	-	-	-	-	-
74	M261T349	261.148	5.81988	34247.8	50038	35978.8	34771.9	54915.3	34168.4	50457.2	38911.1	33312.5	54719.3	35992.2	39639.8	47348.2	35526.1	40395.4	35334	35120.7	36351.8	33978.6	36056.3	43410.7	36490.3	49322	35002.6	44355.1	43174.1	35444.4	35004.8	38792.8	45277.8	35413	31742.7	33663.3	34460.2	47980.1	33450.2	[6][M]+	-	2069	1	0	-	-	-	-	-
75	M261T45	261.16	0.742508	33569.9	32788.7	33292.4	105674	92219.7	124070	49338.4	33644.3	34257.7	41890.6	22047.6	14916.1	36655.4	21495.6	16273.9	38022.7	19863.1	16459.2	27536.4	27218.6	24916	51235.6	30892.3	40698.9	35301.4	28034.4	29976.3	34635.7	25879.4	33341.8	30212.9	31696.2	33473.1	16155.2	16589.4	19019.2	[7][M]+	-	3819	1	0	-	-	-	-	-
76	M261T208	261.221	3.47404	5223.01	4258.25	4347.51	7667.61	4949.32	5706.68	1869.6	6004.52	7407.98	4201.63	3899.56	3200.45	6199.6	4476.59	3711.84	5392.41	3221.14	2946.01	26213.8	26008.8	26812.4	18204	15854.6	12202.2	27578.7	28017.1	15333.5	27538.2	29065.8	18624.1	45040.4	49003	48094.1	20772.4	20966	18571.9	-	-	3951	0	0	-	-	-	-	-
77	M261T659	261.221	10.9791	3598.35	5373.65	3391.99	2343.22	4970.96	4074.79	2128.32	9552.95	2366.86	6635.33	22288	9567.33	2727.82	1635.25	4140.84	4669.22	15209.3	2205.64	3876.34	3960.25	6760.71	2402.54	5024.5	2981.98	4814.6	5955.19	2256.27	37600.8	6342.19	3062.94	4651.43	6616.9	4667.32	12250.6	9477.32	17463.9	-	-	3418	0	0	-	-	-	-	-
78	M261T418	261.221	6.96517	18249	20044.8	17363.3	6697.14	9124.64	13684.5	3474.96	5231.06	4913.81	2445.54	3453.48	2190.07	4400.78	3238.99	3458.4	4241.86	2388.5	3114.13	9777.99	9771.25	14121.7	5457.85	6178.22	7983.15	6049.78	11172.6	5343.78	7083.29	9745.25	8573.98	11396.9	7005.56	7797.06	7278.3	8392.54	8924.73	-	-	870	1	0	-	-	-	-	-
79	M262T350	262.152	5.82516	7083.35	12518.8	8155.97	10347.9	10817.5	8618.36	10419.8	8913.83	7291.3	11877.9	6323.72	7950.86	9488.25	8134.27	8061.84	7938.88	7034.12	6820.86	10024.4	7258.17	8643.37	8062.73	11371.2	7185.07	7838.7	8254.06	7743.74	8768.95	7433.88	10334.7	8007.77	7945.57	7748.38	7822.55	8379.35	6749.35	[6][M+1]+	-	2069	1	0	-	-	-	-	-
80	M262T45	262.163	0.743467	6520.54	6460.43	7544.94	18229.4	16409.7	24181.8	9656.85	6873.29	6221.35	9142.08	4481.18	3100.49	7020.33	5021.04	3099.5	7449.65	4109.12	3271.57	5353.99	5087.46	4971.19	10572.2	4991.72	7673.51	7543.32	5403.03	6168.15	6566.16	6030.5	5837.65	5843.38	6023.85	6690.04	3294.94	3535.66	3885.65	[7][M+1]+	-	3817	0	0	-	-	-	-	-
81	M262T209	262.225	3.47893	1475.59	1110.03	790.5	2049.38	1493.27	1614.29	1450.2	1445.94	2481.45	861.716	678.35	1211.19	1949.79	1371.37	752.844	1609.34	1293.67	894.759	7009.93	6031.88	7663.28	4841.95	3396.63	2975.24	6383.24	8557.8	3952.12	6756.22	7228.01	4437.6	10847.8	11145.3	10548.7	3768.9	4619.33	4840.44	-	-	3949	0	0	-	-	-	-	-
82	M263T45	263.165	0.743783	1458.16	1883.14	1650.72	2177.61	1894.25	2805.65	1470.92	935.963	1096.26	1238.2	575.771	574.626	1004.91	738.286	572.252	1405.53	713.29	599.738	998.014	870.838	1250.69	2304.63	914.24	1129.28	899.161	552.989	1142.9	945.075	808.758	893.715	766.361	799.136	1197.17	841.374	1096.63	637.582	[7][M+2]+	-	3818	1	0	-	-	-	-	-
83	M263T540	263.237	9.00222	25750.5	46040.3	26051.1	20772.8	20149	32663.7	6738.98	5550.44	1951.95	2563.74	3534.96	3905.74	1598.9	2185.34	2234.16	2018.46	2453.02	2707.36	37487.5	31079.5	24353.5	58638.6	34806.4	52949	23966.6	24626.8	17242.6	93857.3	17805.3	21392.9	39744.3	31787.8	31568	33147	11410.1	17694	-	-	4269	1	0	-	-	-	-	-
84	M263T290	263.237	4.82962	304101	267916	249539	156428	191911	215206	16416.6	16259	11986.4	19906.8	15966.7	13755.9	10607.3	12497.9	18033.7	11786.5	8573.15	10558.1	97868.4	93086	103027	165922	183492	189211	98732.6	129633	140647	102399	78459.1	122634	92779	93746.3	96424.5	68484.3	46293.5	62923.2	[8][M]+	-	1544	1	0	-	-	-	-	-
85	M263T306	263.237	5.09413	18546.8	21318.4	17059.8	17634.1	15447.8	13811.2	11965.9	13477.5	12721.1	14518.9	11436.8	10944.4	30653.2	10740	11454.2	11042.6	10663.8	11270.3	12342.2	15031	16013.9	14897.9	21104.6	19005.9	20971.7	16069.3	12482.1	16829.1	15359	17935.8	15316.2	14520.5	13699.8	13269	17339.4	13681.9	-	-	3186	1	0	-	-	-	-	-
86	M263T250	263.237	4.16088	7302.75	5479.34	3120.07	6001.44	3766.56	4909.8	2979.09	4729.04	8665.61	3728.57	4236.67	3571.25	5174.05	4172.47	3473.15	6724.85	3163.04	2203.07	4128.55	9444.94	7185.15	7499.66	7503.61	6798.91	9071.65	11422.6	5982.15	8577.71	8030.87	5159.65	8384.29	7209.62	8565.79	8928.24	7514.73	7563.81	-	[M+H]+ 262.235	296	0	0	-	-	-	-	-
87	M263T752	263.237	12.533	5971.25	8552.61	7975.44	8657.32	6365.56	7155.61	3213.47	8360.92	6769.59	5918.59	15145	13778.1	3183.54	2969.49	7538.63	2776.12	16817.2	3091.24	15555.6	14530.8	12455.1	13279	15102.7	16223.6	16913.7	19535.4	18639.6	50828.8	18721.1	13223.3	17447	11104.6	12643.4	37399	19419.5	36270.7	-	-	598	1	0	-	-	-	-	-
88	M264T291	264.24	4.84258	69075.8	66749.8	59556.6	32396	38110.8	49381.8	5697.94	3107.85	2426.62	7353.3	4735.03	2813.09	2426.21	2202.3	2852.32	3114.1	1882.61	2177.98	22771.2	23324	25195.7	41378.4	38242.9	43723.5	25180.5	29606.7	32895	22356.5	22224.4	27018.1	19257	21858.9	23336.3	14563.9	9653.48	13781.8	[8][M+1]+	-	64	0	0	-	-	-	-	-
89	M265T1002	264.928	16.708	1637.47	2325.44	2695.31	2060.06	2065.87	2028.61	1860.17	2200.77	1529.81	2675.82	2042.55	2023.2	1704.82	2333.36	1980.17	1904.56	2494.72	2364.49	1780.59	3552.5	2277.07	2340.11	2279.7	1256.18	2293.33	1550.46	2747.81	2899.75	2458.67	1038.2	2735.73	2652.72	2314.65	2671.58	2228.09	2247.1	-	-	4896	0	0	-	-	-	-	-
90	M265T41	265.112	0.686858	19160.7	17177.3	18243.8	14397.2	15688	14928.7	15718	17428	15611.8	14719.2	11219.7	11931.3	15007.3	16283.6	18342.9	12447.8	5752.5	9434.67	13402	12799.9	12290.8	25251	18611.1	22407.9	19523.4	20063.2	18619.8	9042.07	12225.1	12232.1	13172.4	13468.4	13955.5	17864.7	15806.9	18652.5	-	-	2481	1	0	-	-	-	-	-
91	M265T310	265.253	5.16453	42530.6	40696.8	34535.8	93938	72848.3	73097	63998.8	68090.3	86590.7	70595.1	74909.9	60571.7	76677.3	65240	74963.8	85129.6	60576.5	45181.4	58543.6	92354.7	74501.2	83968.1	82328.7	104114	75425.3	56222.9	75988.7	62252.1	56730.1	53616.5	47005.6	42053.9	45907.1	41615.1	49005.3	52226.4	[9][M]+	-	1396	1	0	-	-	-	-	-
92	M265T455	265.252	7.58023	4609.6	7090.28	4458.95	7504.97	6666.24	9784.13	9968.49	4737.29	7339.07	10768.3	7282.73	8407.71	10108.4	7919.85	10535.1	8683.75	4964.66	4793.4	2665.02	6141.52	5066.34	3569.12	5072.96	4855.42	4612.14	3586.82	4986.04	3144.35	3456.51	4114.32	4139.96	3195.22	2853.04	4757.25	4633.29	3906.54	-	-	1119	1	0	-	-	-	-	-
93	M265T568	265.252	9.47401	6503.73	8282.38	5605.68	12176.9	9747.98	14573.9	16612.1	4696.34	7080.23	15289.1	36322.5	13099.7	11698.4	11758.3	8911.18	13663.3	16355.7	12569.1	19664.7	16400.6	10812.9	10630.3	13067.6	9760.16	8485.37	14528.9	10185.2	19367.2	13028	11155.1	12158.4	8398.34	13817.3	6616.42	7050.31	12687.2	-	-	742	1	0	-	-	-	-	-
94	M266T42	266.115	0.699142	7792.78	2125	8171.71	2409.87	3205.72	2411.08	3154.54	3566.65	4018.93	2712.25	2001.83	2332.45	2871.99	3060.73	2546.48	2374.13	1085.01	1764.02	2161.3	2801.43	2406.89	2879.84	3021.77	3887.22	2828.97	3195.03	3621.23	1671.55	2265.3	2293.52	2959.43	1818.77	2942.6	3044.37	3286.35	2805.38	-	-	475	1	0	-	-	-	-	-
95	M266T41	266.159	0.679925	2541.11	6118.54	4252.85	4126.04	6072.01	3774.1	30856.6	32826.2	24833.2	5667.89	4435.74	5765.47	7780.26	21467.7	8618.67	8075.68	7016.34	6527.33	4352.59	3956.38	4694.89	48704.7	51121.8	3144.58	3814.99	11408.6	12965.4	3005.1	3914.28	4835.24	6484.81	3878.16	4809	7516.08	21520.7	8510.99	-	-	2482	1	0	-	-	-	-	-
96	M266T310	266.256	5.16445	9509.18	10987.8	9389.82	23840.7	15709.9	20254.7	17110.6	15827.4	23332.9	15626	14915.6	16872.8	16526.1	12919.9	14923.4	20735	14268.4	11445.9	15619.7	21966.8	17707.5	23716.1	20068.6	23549.6	13988	13318.6	18219	14833.1	10051.1	12537.6	9576.8	9867.54	12005.9	8805.5	11297.7	13533.7	[9][M+1]+	-	1397	0	0	-	-	-	-	-
97	M267T42	267.107	0.699367	2110.07	2485.72	5024.41	1942.47	2655.92	2504.93	1640.63	1462.04	1429.66	1086.94	627.64	828.425	823.308	1734.7	1245.67	842.197	622.697	825.52	996.509	830.217	1485.88	2751.84	1833.36	1899.81	1187.86	1482.56	1680.64	878.812	827.027	976.858	1029.86	889.55	800.986	1500.16	1299.54	1667.37	-	-	475	1	0	-	-	-	-	-
98	M268T42	268.104	0.701375	10318.8	10810.7	11286.8	6811.15	7364.49	7229.81	7696.57	5970.96	8961.72	3661.31	2469.15	2267.33	5003.47	6261.16	4872.46	4638.9	1901.7	2152.82	2685.07	2599.29	2888.8	8635.64	7819.33	4360.07	3564.5	4428.2	4014.83	3443.14	3491.62	2704.72	3241.2	3202.26	3442.66	4033.59	5240.07	2138.1	-	-	4805	1	0	-	-	-	-	-
99	M269T44	269.126	0.729083	3169.74	1794.83	3032.09	6503.93	4038.5	3653.15	12250.6	11709.7	22124.8	9801.89	6170.83	5235.93	11707.9	12528.4	7063.19	15566.3	8277.53	7773.06	14642.1	14916.9	14804.9	16977.9	14750.7	8502.19	10158.4	14255.5	13329.6	10787.2	13547.2	8921.8	16352.3	15653.8	15032.8	13462.6	12560.6	11030.4	[10][M]+	-	407	1	0	-	-	-	-	-
100	M269T66	269.175	1.1054	965.618	2547.25	2226.31	3614.75	3439.07	3102.73	3154.82	4960.06	2406.24	3246.89	1788.88	2193.86	1528.82	1664.48	3869.19	2523.22	2644.1	1576.78	11698.1	10139.6	10623.7	12902	13628	12126.8	26136.8	18064.7	6692.4	9253.63	6170.82	6649.77	4848.03	6132.69	5502.04	8164.22	4901.18	7558.45	[11][M]+	-	4417	1	0	-	-	-	-	-
101	M270T44	270.129	0.7293	1842.87	1401.35	1477.62	1093.05	1123.99	1058.63	2619.58	2673.06	4731.82	2094.63	1712.03	881.778	2215.62	2881.6	1548.43	2602.71	1758.07	1384.53	2458.6	3285.59	2856.57	3341.44	3506.04	1469.04	1998.54	2759.42	3523.34	2237.57	2187.41	2028.57	2907.85	2783.97	3433.95	3614.08	2519.74	1476.74	[10][M+1]+	-	407	1	0	-	-	-	-	-
102	M270T67	270.178	1.10949	988.281	987.3	927.237	1024.08	925.831	1075.44	1099.59	1234.04	957.711	862.442	769.242	810.929	970.235	752.626	810.095	955.598	1035.66	786.85	2268.05	1969.71	2854.45	2830.12	2908.37	2239.28	5188.11	3133.98	1413.99	1886.39	1183.62	1256.17	1062	1156.88	1010.91	1705.79	929.925	1564.52	[11][M+1]+	-	370	0	0	-	-	-	-	-
103	M270T290	270.315	4.83234	3336.58	4000.33	3048.69	4175.66	7221.37	5341.59	3180.88	3666.21	4706.93	6226.17	3970.37	2013.02	3952.31	4716.68	7183.43	5056.23	4558.22	4650.57	3235.65	5623.79	5990.98	4151.44	9806.44	4097.46	7118.68	9614.95	6589.89	4641.92	6015.61	5278.45	5286.23	5343.1	4932.14	3285.8	4044.74	4238.9	-	-	1551	0	0	-	-	-	-	-
104	M271T313	271.242	5.22218	4324.1	7260.42	4926.71	4261.98	2922.95	3721.44	3556.35	5340.74	3962.71	4296.26	2175.76	3819.41	4152.23	4040.48	3293.42	2643.79	2912.83	3207.91	2964.86	2249.13	3648.69	5456.04	4194.98	3741.74	1935.48	4911.63	3309.74	3403.2	3377.79	3455.64	3237.51	2206.95	3300.65	2379.03	3084.93	2660.78	-	[M+H-H20]+ 288.246	2262	1	0	-	-	-	-	-
105	M272T49	272.185	0.813783	2381.86	1877.64	1611.22	747.346	449.341	1592.89	1046.61	1236.19	588.856	849.682	630.259	714.356	672.305	639.789	733.547	737.524	703.162	695.129	1440.44	1320.07	1429.47	1327.65	1118.8	786.065	1011.37	706.215	682.898	1620.01	1010.04	859.418	944.125	813.698	827.018	1725.23	657.324	1524.91	-	-	4760	1	0	-	-	-	-	-
106	M272T67	272.223	1.11992	955.194	996.912	1004.69	774.416	922.403	1011.23	901.529	764.137	1128.17	767.832	866.835	849.964	640.518	563.434	563.992	832.032	908.097	876.776	1039.9	958.581	636.866	944.332	1361.99	692.504	774.136	505.789	1173.76	876.381	829.393	1031.96	792.96	1111.32	1082.22	955.141	618.302	840.213	-	-	4418	1	0	-	-	-	-	-
107	M272T258	272.258	4.3002	16068.9	16558.7	10873.2	24353.1	9593.87	18768.9	10916.4	32221.9	15466.9	17592.2	28976.6	15307	24638	33435.5	17128.6	16969.9	16865.1	33937.2	13692.9	19178.2	37222.3	9487.97	7695.77	13553.9	31624	13954	35494.7	9864.55	19791.2	20939.3	11160.4	11400.4	8693.82	35273.8	20256.8	9334.49	-	-	476	1	0	-	-	-	-	-
108	M273T621	273.258	10.3533	30068.5	28702	24012.9	10128.6	7795.99	9874.76	9534.92	7452.63	7689.35	11211.7	9296.88	10099.1	8320.57	5436.12	23132.1	5855.35	15408.3	10120.8	8995.76	8181.01	8122.97	7103.77	9506.83	4292.36	20004.7	9154.18	7915.72	8504.99	8778.01	8578.02	7895.56	8069.29	7749.74	6425.75	7625.7	5581.61	-	-	3374	1	0	-	-	-	-	-
109	M275T1021	274.91	17.0142	778.8	593.464	918.354	680.24	862.203	830.563	894.96	1097.83	1300.65	789.973	773.52	1140.34	1042.6	765.998	1779.71	869.738	980.22	1095.44	986.538	854.905	1063.67	1502.47	1018.17	1879.37	1390.51	960.08	1384.68	853.997	743.82	1214.6	839.57	874.437	1148.42	1069.11	1073.19	905.451	-	-	4906	0	0	-	-	-	-	-
110	M275T380	275.164	6.33292	23760.3	11292.2	12175.3	16270.3	31724.1	10965	20585.2	22574.5	13103.4	26726.1	9199.35	6822.09	30050.9	13111.6	20763.6	16760.2	21229.8	14963.4	19161.5	23182.8	15843.5	9544.94	30992.7	7081.45	12400.3	18984	11949.4	13782.9	19139.4	13309.4	9451.01	18103.2	20895.6	14797.8	17633.1	20719.7	-	-	3356	1	0	-	-	-	-	-
111	M275T180	275.201	2.99847	60354.5	56348.3	58177.9	16784.5	22355.9	20599.7	672.695	1387.47	1388.49	1887.73	1196.16	1299.43	2432.76	1853.7	1897.38	1180.91	900.638	1202.59	1609.2	1556.81	1572.56	2089.88	2147.89	1596.44	2560.75	3751.23	1674.61	1438.68	1789.44	2100.6	1660.38	1309.66	1465.56	1327.79	1820.63	1553.76	-	[M+H-H20]+ 292.206	324	1	0	-	-	-	-	-
112	M275T66	275.2	1.10077	17422.7	17431.1	14993.6	12113.1	5546.23	15802	877.722	3861.46	2093.99	1501.62	984.2	1158.32	1833.78	1736.3	2846.44	1731.08	866.485	1097.28	1267.24	1202.3	1316.79	1673.84	1546.19	1771.22	2226.24	1822.1	1242.27	2685.59	2749.01	1271.6	2711.97	1683.58	1491.75	3694.51	1573.7	1485.4	-	-	4428	1	0	-	-	-	-	-
113	M275T276	275.258	4.59352	6792.86	15456.7	15220.2	14784.4	13818.1	8730.31	4033.65	7423.99	5606.58	14820.8	8979.21	11763.7	13507.3	10262.2	5099.68	4390.22	8630.72	14465.3	9267.29	6651.7	19265.3	5664	8585.76	17791.8	12579.1	14177.5	6853.8	14077.7	4477.96	5638.77	7272.04	9544.98	7074.53	7136.73	9853.47	12821.7	-	-	4254	0	0	-	-	-	-	-
114	M276T380	276.167	6.33187	3550.52	3706.3	4735.08	3259.13	6879.08	6016.05	6067.31	5426.75	4932.19	2587.97	4302.55	3735.74	1974.19	2948.46	4423.09	3461.38	4810.26	2371.96	3078.53	5937.45	6196.1	3069.53	6372.72	5763.08	5529.85	1696.72	6612.84	1799.51	3989.97	3632.14	2210.38	3900.74	3702.69	4788.32	4121.05	1139.38	-	-	3357	0	0	-	-	-	-	-
115	M277T203	277.216	3.38252	110070	115854	117177	115432	47243.3	50992.8	15395.7	25871.6	27675.6	14696.1	15256.8	17350.6	13676.1	18894.3	20791.6	24531.8	10356.8	12572.9	38264.7	35344.9	26511.1	29529	30972.1	29478.1	32113.6	28255.6	27105.9	65779.5	44019.9	46799	46672.9	47057.7	50018.2	45651.5	44052.2	32828.9	[12][M]+	[M+H-H20]+ 294.221	279	1	0	-	-	-	-	-
116	M277T180	277.216	2.99556	90292.3	85900.4	93205.4	36928.8	38028.5	35875.8	6013.35	8244.98	16728.2	9901.05	8203.35	7768.53	13270.7	14117.2	17331.7	13617.1	6409.82	7139.84	7282	7268.26	7780.35	10228.2	7542.43	7245.51	10505.8	11762.9	7460.31	8039.07	8250.53	8237.11	10765.7	7667.54	8890.58	7011.76	8445.84	7892.64	-	-	4240	1	0	-	-	-	-	-
117	M277T281	277.214	4.68722	5059.49	11109.9	6520.67	10877.9	8028.21	8215.73	5225.02	2265.03	2599.3	4869.94	3685.69	4050.86	3800.34	4997.44	4487.15	4492.47	2748.83	4260.52	6770.5	6416.39	8163.94	7064.14	8565.74	6602.37	5999.41	7183.42	8607.63	7450.68	7229.78	5233.17	5042.54	6986.89	4108.48	5097.27	9544.31	5904.38	-	-	2617	1	0	-	-	-	-	-
118	M277T106	277.216	1.77207	9184.27	9274.97	8753.71	6110.45	7805.71	7198.24	1247.77	2101.77	1889.05	1667.08	1458.79	1345	1722.91	1648.94	1669.6	1785.91	1000.47	1198.24	3384.46	2874.46	6003.84	2626.63	2402.04	1700.5	3980.47	3553.02	2637.4	5467.89	4152.59	5942.38	5845.55	5940.06	5568.5	3439.66	3160.92	2894.76	-	-	4533	1	0	-	-	-	-	-
119	M278T203	278.219	3.3883	23910.1	24282.4	24700	9696.94	10537.6	12271.3	4201.68	4156.99	5296.03	4570.99	3282.8	2595.14	2071.33	4014.01	4309.99	6251.58	3169.31	4042.51	5349.64	6688.31	7908.72	8946.55	6990.53	8669.4	6555.22	6631.68	5662.35	9744.06	8511.6	10505.6	11439	14644.7	14089.4	8693.71	8813.83	9382.43	[12][M+1]+	-	3929	0	0	-	-	-	-	-
120	M278T298	278.245	4.97458	2191.5	2551.71	3173.99	3471.17	4597.3	4675.19	2322.58	2270.26	2790.72	2032.89	4046.8	1873.98	2673.46	1561.92	1940.53	2453.78	1679.85	2479.64	1963.85	3027.69	1823.35	2214.85	3294.53	2331.35	3030.75	2960.88	2938.47	2613.72	3452.69	2206.18	3602.87	2562.15	3087.77	3195.36	2457.75	2196.3	-	-	3855	0	0	-	-	-	-	-
121	M278T207	278.247	3.45217	49603.4	44292.2	45336.6	1879.26	2951.32	2482.75	1100.5	929.612	2300.82	1153.54	4494.69	5322.81	5299.9	5873.35	7034.03	2113.91	1637.5	1303.67	8446.76	9263.06	590.962	10900.7	1463.74	921.196	9964.77	1282.14	1318.65	1897.61	2438.9	10758.1	1073.08	1907.44	11951.6	10208.4	1183.54	1227.7	-	-	2926	0	0	-	-	-	-	-
122	M279T349	279.159	5.81948	171257	176869	143122	164517	192117	170546	207210	173453	164293	197180	159863	160493	178453	157300	183872	295333	159138	166646	171795	148591	175614	162371	186125	162247	202798	163557	156975	180572	169940	407581	143199	174486	159782	158507	201707	152408	[13][M]+	-	2070	1	0	-	-	-	-	-
123	M279T207	279.232	3.44176	92510.9	93371.2	86316.2	132093	89971.7	83957.3	58243.2	96620.2	121177	47149.8	51778.5	45283.9	77047.8	67500.7	59769.6	95042.5	41166.2	46173.3	241325	241136	251585	172037	154997	131875	262420	295203	144947	281317	297903	184003	364053	422195	437852	205092	250324	151313	[14][M]+	-	2912	1	0	-	-	-	-	-
124	M279T228	279.232	3.80714	9161.66	13818	13040.7	14336.2	14246.2	12938.3	164021	6324.6	7367.61	5042.82	5278.65	164043	4158.54	7984.61	10493.7	4314.13	158896	159750	24065.5	22459.4	24244.4	29720.5	30125.9	22064.2	33599	26785	23974.3	35764.8	34136.7	24494.3	50374.6	54902	50261.2	25473.8	23508.6	24346.5	-	-	4267	1	0	-	-	-	-	-
125	M280T350	280.163	5.82534	33168.8	37567.7	31378.7	30199.6	34667.1	32681.1	40760.9	80619.3	32634.8	35578.5	48393.6	31869.3	41855.7	32723.9	34684.1	33293.2	29682.3	33666.4	32623.3	36188.6	35523	34918.9	38124.6	36427.6	134384	37864.2	33079.8	34198.2	34489.8	34546	43310.7	29735.1	29095	32786.9	54892.6	32791.4	[13][M+1]+	-	2070	0	0	-	-	-	-	-
126	M280T207	280.235	3.44257	22253.3	20846.4	19880.5	29900.1	19499.8	19456.9	12337.9	22789.6	28772.7	11660.4	13558.2	11206.2	18643.7	15524.8	14766.9	22563.3	9090.07	11719.3	55536	55250.6	63675.6	37722.6	35978.8	30598.6	62598.6	66133	33460.9	66101.2	62794	43680.5	82618.6	98070.7	91101.3	44193.3	56531.2	35960.3	[14][M+1]+	-	2912	0	0	-	-	-	-	-
127	M280T286	280.264	4.76976	14578.1	11122.6	11149.6	15903.5	16696	19548.4	8707.63	10765.6	7647.25	21856.5	10997.8	12575	12466	7358.86	11664.7	11129	9499.34	12907.4	11108.1	14358.7	12674.2	13338.2	20654.5	10640.4	18493.5	12757	14919.3	14762.6	14957.1	12558.8	15027.7	17808	18204.6	10594.3	12112	12533.8	-	-	4386	1	0	-	-	-	-	-
128	M280T238	280.264	3.97143	11475.1	10624.4	11378.6	30015	33592	42813.3	12056.4	15603	14821.2	14732.7	8662.27	7740.72	6690.19	8778.23	7234.47	10076	6186.04	9935.3	14138.2	16493.7	14962.2	21063.5	22666.4	23906.4	24034.6	20686.2	12424.1	16915.4	11640.6	15206.1	15973.2	14589.9	13371.9	8166.48	6592.94	7282.23	[15][M]+	[M+H-H20]+ 297.267	285	1	0	-	-	-	-	-
129	M281T46	281.106	0.759283	2334.59	2239.89	2790.71	2563.18	2784.76	2899.89	1556.95	2040.2	1609.89	1163.58	1708.79	1325.25	976.844	1769.17	1515.27	2365.69	2079.53	2303	1942.3	1997.98	2473.12	2518.84	1328.77	2221.7	1506.1	1940.87	1990.66	2755.14	1337.99	2544.93	2006.55	2232.1	2278.03	2339.04	3474.07	2390.17	-	-	439	1	0	-	-	-	-	-
130	M281T350	281.165	5.83667	8799.75	7659.14	5910.37	6657.4	7171.71	6070.91	7058.88	7984.33	15795.7	8388.66	7254.07	7269.91	6377.29	14742	6981.24	6136.42	7247.53	6167.22	6779.23	14090.1	6469.32	6074.99	8041.67	6503.34	8273.09	7577.76	6020.13	20944.6	6126.18	7704.99	7532.39	5539.05	6320.48	6170.69	9251.89	6339.96	-	-	4290	0	0	-	-	-	-	-
131	M281T206	281.239	3.43398	2275.59	2734.2	1361.87	4319.71	3489.16	3293.97	3838.46	2230.01	5817.53	4043.59	1620.43	3294.57	3246.52	2685.96	3579.32	4133.79	2983	3566.65	5921.99	9887.55	8537.4	4241.62	4164.22	4750.14	8899.28	11179.5	4495.36	9699.66	10331	4300.65	12281.1	14738.9	13586.3	7773.68	7031.97	5115.86	[14][M+2]+	-	2912	0	0	-	-	-	-	-
132	M281T250	281.247	4.16817	4043.35	4631.76	4180.1	9003.23	8387.66	7552.94	8763.18	10995	22895.1	9039.09	23719	9684.22	14856.6	10300.6	10227.9	17397.6	9363.51	5804.55	24296.7	14447.1	12433	17685.5	16562.4	23912.9	16817.5	16585.4	20183.7	19322.7	22280.4	12231.8	33487	19509.5	19853.4	14115.5	20481.5	20600.5	[16][M]+	-	4069	1	0	-	-	-	-	-
133	M281T305	281.247	5.09035	15834.4	18884.4	16299.4	16618.9	19932.9	17598.1	18161.5	14903.8	16022.9	16636.8	15261.4	18519.7	16155.2	21206.4	12025.1	18482.6	14736.1	13911.9	21700.1	17536.7	21651.4	16242	15007.9	20391.4	20557.6	15268.5	16407.6	19232.8	19855.2	16460.2	15219.1	15889.8	16979.6	13834.1	19503.5	22607.9	-	-	3766	1	0	-	-	-	-	-
134	M281T290	281.248	4.83577	53945.2	33479	23839.6	20141.9	22146.2	24395	11597.1	6872.19	7927.38	9907.51	9938.75	8609.33	8576.29	8041.08	8261.73	7130.77	5822.22	6301.02	17208.8	14178.8	15266.1	19441.8	31764.4	25257.9	20472.8	18030.1	17857	15218.7	11998.2	20710.4	14352.4	16964	12904.9	13219.9	14049.1	12885.3	-	-	64	1	0	-	-	-	-	-
135	M281T238	281.267	3.97143	4873.13	3722.82	3018.81	6927.65	6429.05	10915.1	3134.67	4048.17	3438.16	3393.78	2063.34	1709.02	1658.69	2134.43	1535.75	1813.37	1162.97	2019.06	3517.1	4289.52	3674.05	4670.51	4338.32	5968.42	4704.53	3607.63	3183.72	4206.41	2344.61	3223.12	3155	3491.58	3746.9	1992.23	1784.89	2428.88	[15][M+1]+	-	285	0	0	-	-	-	-	-
136	M282T42_1	282.048	0.699883	1341.53	1296.78	1654.11	940.432	1934.03	937.728	3282.51	3929	1894.97	2419.8	1545.45	1570.73	673.646	1635.17	896.41	1249.25	1145.97	1680.8	1731.99	1645.46	2272.2	5258.14	4459.55	1230.71	854.344	1428.38	1573.35	2121.03	1991.18	1884.14	1975.92	2088.28	2317.47	959.365	2161.23	2039.7	-	-	4806	1	0	-	-	-	-	-
137	M282T42_2	282.119	0.6987	2749.25	2931.06	3190.47	2833.59	2584.73	3360.8	3623.21	4286.33	3796.85	2453.35	1353.4	1428.44	2918.38	3464.72	3187.02	2763.35	825.083	1390.21	1697.05	1543.39	2016.19	3705.99	2055.81	1366.88	2511.28	3049.18	1764.61	2222.5	1877.32	1639.18	1845.44	1907.08	2247.46	2085.75	2958.22	1361.24	-	-	2483	1	0	-	-	-	-	-
138	M282T67	282.204	1.11035	11412.3	13132	11930.2	14063.8	12208.2	12760.1	15640.2	14164.1	20755.6	14984.9	14992	15739.9	15694.8	17795.1	15934	24059.3	17977.2	17235.1	19261.4	13881.3	13334.6	16660.1	15860.9	15418.7	13352.3	14630.4	16880.5	15316.2	15883	18671.4	16950.2	14772.8	15132.1	15580.6	17625.1	18810.4	[17][M]+	-	4419	1	0	-	-	-	-	-
139	M282T250	282.251	4.16665	10750.2	1061.63	10665.8	2066.6	12884.8	12165.1	1595.34	3649.98	5543.55	9297.31	2407.75	2323.64	3198	2355.94	3929.75	3589.73	2128.6	1063.89	3192.86	2420.88	5439.56	3862.49	3783.94	14146.9	5789.85	2945.82	3425.04	4256.18	4401.67	4076.82	3296.73	3997.89	4144.68	4092.64	5820.87	3475.54	[16][M+1]+	-	4078	0	0	-	-	-	-	-
140	M282T306_1	282.252	5.0922	4516.73	54172.1	4874.97	137585	3794.59	6040.9	8117.3	4483.08	4156.25	4423.98	3680.23	4754.22	2887.24	4626.73	3706.64	3706.71	2696.9	4765.47	4457	4423.53	74450.8	2747.62	4883.11	4880.9	7295.54	5341.76	3247.96	4031.35	63635.5	64249.6	58384.3	3217.72	61095.6	2902.17	4342.49	5105.42	-	-	3767	0	0	-	-	-	-	-
141	M282T306_2	282.279	5.10635	54070.8	70970.9	47812.8	137237	184478	229128	62369.8	103415	61741.1	53630.8	99440.9	60587.7	52029.3	72246.6	73023.2	84022.2	81968.3	68346.9	59366.2	66679.8	61916.8	81592.8	90689.3	83306.5	86038.6	87866.3	79501.9	65679.9	67077.5	48447.5	60152.4	58227.6	76044.4	60563.8	61069.8	72835	[18][M]+	-	195	1	0	-	-	-	-	-
142	M282T604	282.279	10.0669	10901.6	11888.5	12655.8	9451.57	12186.9	12207.2	11889.3	30302.4	16076	21153.6	14247.5	15289	8756.37	10830.5	16063.6	13035.3	5959.69	7578.45	22717.1	23117.3	26706.2	15850.5	17296.2	23372	21097.2	24633.6	37230.6	14556.4	13237.4	10651.5	6856.25	10236.7	7399.68	9165.14	7525.38	16473.6	-	-	1572	1	0	-	-	-	-	-
143	M282T401	282.279	6.68017	6329.71	7126.57	8061.29	6074.4	3287.19	4330.97	1843.93	3881.2	3036.94	2210.81	5654.89	3823.73	1512.44	2472.59	1991.03	4417.15	1401.5	1439.71	8757.83	8223.12	13139	9833.6	7921.52	15593.6	8004.62	12411.8	10205.2	10107.5	5666.17	3974.21	4497.17	4365.41	5576.7	3882.06	3777.09	5170	-	-	1019	1	0	-	-	-	-	-
144	M283T50	283.154	0.833908	28903	492.898	15780.2	1079.25	1655.41	4239.5	1252.02	2364.75	924.88	1211.24	678.467	1731.54	1606.34	2011.34	1007.92	2109.28	876.607	1702.69	6096.52	5342.14	5928.56	2641.4	3151.99	3714.18	2784.41	4460.58	4608.93	4602.43	2758.21	3145.59	2406.97	2354.54	2868.41	4250.68	4320.76	4214.26	-	-	350	1	0	-	-	-	-	-
145	M283T67	283.207	1.11022	5289.4	2759.04	7454.71	2493.49	2668.2	3088.09	2695.09	2566.76	3634.26	2774.95	2820.04	2819.14	2922.41	2781.73	3362.89	2963.6	3825.33	2813.71	3326.09	2186.51	3261.74	2752.24	2909.7	3239.1	2600.04	2753.49	3683.28	2768.69	3155.27	3486.03	2444.98	3135.52	2558.58	3262.6	3047.47	3164.85	[17][M+1]+	-	4420	1	0	-	-	-	-	-
146	M283T309	283.263	5.15643	18285.6	19563.4	16453.2	32182.7	27129.1	28841.1	29573.8	29725.7	34024.7	32685.4	29118.5	29041.5	28401.4	25131.6	32201.2	33508.7	22167.8	21097.5	28244.6	32861.8	30130.7	51624.5	36066.9	38318.2	36118.8	25619.9	33761	26216.4	26541	21593.9	19478.2	23368.7	24529.2	19543.3	20737.3	22852.2	-	-	2709	1	0	-	-	-	-	-
147	M283T306	283.283	5.10627	9794.14	8357.31	10052.2	30786.7	43682.4	46750.5	13585	19517	14346.2	9387.61	17305.6	13794.6	9041.5	15752.3	13522	19209	19685.5	16735.4	16018.5	15002.3	16934.8	20729.2	14622.8	17405.5	18119.8	21762.1	19921.7	14861	15179.1	14721.4	12823.5	15575.6	14760.8	13885.4	13469.4	15465.4	[18][M+1]+	-	3187	0	0	-	-	-	-	-
148	M283T604	283.282	10.0679	4947.05	5152.82	4297.71	4361.11	3901.88	5184.28	3305.88	5211.45	3520.36	4460.08	2776.85	3447.13	3050.62	2118.88	2722.99	2649.28	1516.55	3011.48	4791.78	3378.42	8131.39	3495.65	3997.16	4812.04	4559.98	5347.76	5676.16	4674.93	1378.24	3909.48	1626.61	2903.63	1776.33	2922.14	2192.22	4533.39	-	-	1573	0	0	-	-	-	-	-
149	M284T46	284.162	0.773417	19985.8	903.862	22883.4	1184.05	4058.87	1009.26	742.078	2010.43	2218.12	925.274	1180.05	1268.28	1478.21	2708.04	2146.04	2070.91	1244.98	1364.53	2282.77	2662.35	1336.61	1829.3	2025.75	2348.69	603.934	2167.69	1546	1562.59	1474.56	1647.69	1542.69	1503.93	1703.99	1304.03	2203.24	1959.94	-	-	4018	1	0	-	-	-	-	-
150	M284T310	284.266	5.16315	2778.8	2881.15	6286.76	9103.15	4630.25	6154.57	7308.71	9283.71	10567.7	6024.21	6836.28	8454.48	8428.51	4921	5421.34	10661.9	5522.13	3782.86	7573.49	9707.41	6399.42	9428.33	10628.1	10500.4	6480.44	6894.26	8258.27	6340.01	2248.8	6354.62	4489.68	7106.49	5698.95	6160.75	4457.48	3965.25	-	-	2695	0	0	-	-	-	-	-
151	M284T330	284.295	5.5074	35064.6	48358.5	31814.8	54196.6	72785.4	80828.9	45806.5	38955.6	33603.6	49990.4	43085.9	31157.9	56264.1	44302.1	35238.9	37733.7	38065.4	34939.2	34529.7	42595.9	45338	48092.8	50563.6	44872.9	48110.2	43587.9	52029.1	32073.5	38106.7	48979.8	33016.7	49870.2	34500.1	40834.7	46142.6	51022.3	[19][M]+	-	4191	1	0	-	-	-	-	-
152	M284T255	284.331	4.24648	7441.89	7057.2	5148.35	11378.2	7855.92	7335.32	15223.9	12181.6	7228.25	4877.44	6407.24	6951.42	7043.34	7147.49	7165.74	4512.4	6195.9	10529.2	12052.9	11371.3	5662.77	9675.91	18306.5	12722.8	10046	8811.06	4823.17	7880.02	12235.3	7621.64	8831.22	13250.1	12297.3	9706.4	4152.96	5967.59	-	-	4100	0	0	-	-	-	-	-
153	M285T1015	284.869	16.911	1254.03	1244.65	1350.56	1121.3	1393.29	1413.83	1018.93	1313.26	996.136	1023.33	1178.32	1618.99	1098.65	904.164	1131.09	1446.82	1479.46	979.332	1615.49	1455.52	1267.72	1450.73	1078.14	1012.04	1454.42	2992	777.04	991.25	1147.52	1238.95	579.94	1351.78	1393.42	2158.24	1450.22	1515.95	-	-	559	0	0	-	-	-	-	-
154	M285T1002	284.993	16.7035	2613.2	2845.31	2320.85	3445.18	3614.85	2553.14	2080.48	3041.27	1687.32	2866.46	2897.36	2724.51	2903.14	3739.71	2632.6	2416.25	2667.56	2996.03	3089.76	3618.31	2881.54	2903.38	2595.81	4795.65	2266.13	3026.55	2726.07	2973.61	2518.19	2969.18	3697.57	2719.57	2888.61	2776.71	3189.45	1490.58	-	-	4897	1	0	-	-	-	-	-
155	M285T44	285.101	0.726833	5824.89	5906.82	6919.3	21953.1	15721	13808.9	54294.5	55037.8	81618.6	31000.6	14251.1	14018	39395	46437.3	36159.3	37075.2	14884.1	19819.6	53487.6	50001.4	53806.6	75721.9	64713	29537.4	35303.3	54438	36146.9	29092.8	40999.9	23299.7	36833.1	35195.1	37602.8	42126.8	54612.1	37442.7	[20][M]+	-	198	1	0	-	-	-	-	-
156	M285T49	285.169	0.817733	8719.5	8824.82	8951.45	1547.97	4388.79	4163.84	1644.32	1801.5	936.072	1387.96	1171.38	869.036	1352.26	1215.36	680.141	1386.59	956.992	1197.9	1345.19	1277.66	1909.29	1614.99	2029.15	1434.21	2192.49	2314.38	1428.82	1367	1309.4	1382.06	1280.99	1086.12	1379.2	1860.31	2938.82	1882.81	-	-	4763	1	0	-	-	-	-	-
157	M285T270	285.242	4.49267	15842.8	17676.8	17781.3	23649.1	12145.5	16214.5	32449.4	8277.23	15962.1	19534.7	8071.37	15361.5	12367.3	10257	9738.46	16998.5	7597.89	10622.3	16829.5	16252.8	15921.2	21118.3	18285.1	17416.3	15216.3	9416.29	14031	21387.6	4706.71	17995.5	10347.2	8804.83	15824.3	16143.4	8096.38	21109.6	-	-	3428	1	0	-	-	-	-	-
158	M285T330	285.298	5.50732	6879.75	8892.95	6859.84	12077	15311.3	16188.6	10537.7	8396.45	7755.38	9962.31	7734.1	7976.26	10155.4	8963.98	7785.31	7486.02	10052.4	6849.02	7155.8	7127.12	11826	9931.88	12420	9197.36	10552.5	12176.3	8904.9	8468.63	9466.29	9526.83	8455.18	10549.4	7666.48	8050.13	10257.4	6959.79	[19][M+1]+	-	4191	0	0	-	-	-	-	-
159	M286T43	286.103	0.723942	1619.72	1805.07	1817.26	4285.15	3021.24	2333.59	9501.05	9403.85	17040.9	5847.73	2543	2392.49	8861.46	8752.16	6586.52	7842.85	2776.47	3629.01	9685.01	9527.93	11903.4	13848.1	15937.2	5352	6865.58	9444.65	7362.8	5341.66	8131.2	4217.98	6412.95	6536.71	7867.54	7645.75	11491.3	7986	[20][M+1]+	-	198	1	0	-	-	-	-	-
160	M286T262	286.31	4.36683	6634.45	3931.45	10582	5980.67	4808.22	4876.14	6272.44	6849.49	10935.3	3281.94	8796.38	7046.61	12475.4	7207.69	6809.53	5705.55	9744.88	5662.09	5677.24	7019.6	7599.13	11268.6	13155.9	12730.7	9631.35	6330.17	4563.6	7860.42	3415.28	11389.1	3433.07	7707.67	5488.75	6921.78	8340.19	6626.24	-	-	4361	1	0	-	-	-	-	-
161	M287T44	287.098	0.726833	2197.24	2003.08	2037.58	2009.05	1706.04	1628.02	5837.96	5349.97	7704.26	2891.54	1434.02	1340.71	3766.49	4813.18	3344.94	4670.23	1426.46	1633.77	4936.87	4851.63	4861.9	7940.09	6230.01	2758.55	3614.16	5291.8	4662.13	2900.59	3417.61	1890.78	3263.93	2943.46	2863.54	3079.42	5206.87	4062.99	[20][M+2]+	-	198	1	0	-	-	-	-	-
162	M287T336	287.141	5.60325	2230.37	2211.65	3348.13	2250.53	2795.27	2000.48	3709.2	2128.29	2330.67	3590.18	2505.3	3034.14	3564.35	2792.63	2372	2653.55	2103.59	2211.4	2687.48	2156.66	3443.77	3558.05	3513.61	3432.89	3528.89	2850.03	3040.26	2933.79	2463.04	3030.32	3669.95	2661.83	4274.82	2541.7	3791.65	1667.35	-	-	2988	1	0	-	-	-	-	-
163	M288T44	288.102	0.72885	3072.94	2165.97	1802.04	811.93	787.853	895.936	1151.51	1531.81	1528.82	708.205	339.457	444.143	910.108	1245.54	747.84	1030.09	431.229	572.552	1075.55	903.025	866.029	2323.88	1679.25	936.455	812.371	1075.88	841.962	485.392	857.986	545.046	780.389	626.841	655.848	1090.4	1512.65	910.724	-	-	4574	1	0	-	-	-	-	-
164	M289T41	289.092	0.685083	1812.57	1371.33	1674.13	857.574	1697.66	631.937	19208.9	28669.2	22219.5	1297.95	1074.54	590.169	2795.85	13201.2	4064.78	9306.15	588.915	595.696	972.925	912.921	908.46	33123.4	35013.1	7143.75	2680.58	6680.99	13751.3	1238.2	779.946	930.405	1003.91	1058.49	919.346	4051.95	13765.2	4340.85	-	-	127	1	0	-	-	-	-	-
165	M289T314	289.253	5.22613	4094.9	6255.99	3156.77	3887.73	2900.03	5036.45	6019.99	4864.58	4401.36	5507.24	4885.27	4498.34	4822.61	2835.59	5781.6	4714.89	2669.01	4453.04	5850.68	5423.98	4980.2	3728.94	6828.33	3253.47	4654.82	3601.24	6268.54	6135.71	4882.39	2533.15	5106.95	1733.84	2425.56	4499.02	2101.63	3040.11	-	[M+H]+ 288.246	2262	1	0	-	-	-	-	-
166	M289T289	289.273	4.8143	4590.9	2995.46	1452.25	2910.37	4280.71	1947.82	4829.01	4082.75	4235.52	5188.33	4820.07	3959.44	8778.76	6122.06	2403.97	4302.36	4601.67	1323.14	4004.81	2286.16	5330.19	2360.88	5610.45	1859.8	5604.81	3950.26	2581.01	4619.35	2959.87	4877.9	3964.21	4291.2	2572.24	2740.58	4098.79	5062.68	-	-	167	1	0	-	-	-	-	-
167	M290T42	290.087	0.699333	1861.67	1807.34	1764.25	1750.2	1241.79	1352.34	2806.3	4301.48	4368.45	1624.44	1317.77	1247.08	1558.9	884.619	971.649	1904.13	1997.62	1344.72	939.849	1231.5	1222.98	5403.06	7399.52	1038.1	1030.96	1364.12	2787.91	1915.76	1353.33	1525.43	1972.05	2219.14	2000.86	1421.84	2847.29	1798.87	-	-	4807	1	0	-	-	-	-	-
168	M291T278	291.195	4.63463	4783.05	5799.14	11024.7	5225.43	5837.84	3562.42	5799.91	4814.95	4554.77	5400.26	4931.61	4886.7	5871.41	13205	2949.51	4356.68	2707.61	4658.63	4625.25	4555.27	5352.93	8631.05	4313.27	4008.07	5362.95	5382.68	5196.15	3035.68	3276.51	6628.02	5732.47	6260.9	4126.17	4623.74	5215.87	4146.51	-	-	3383	1	0	-	-	-	-	-
169	M291T63	291.195	1.04454	15312.7	15919.8	15216.5	4703.22	6910.83	5809.26	1328.18	1091.38	1419.15	1160.51	1074.44	1069.52	1457.41	1452.12	1931.67	1766.7	891.697	1051.46	1151.89	1168.57	1150.12	1218.42	1470.61	1351.08	1528.97	1388.98	2165.31	1294.51	1271.45	1514.31	1108.68	1132.6	1275.9	1699	1016.36	3019.24	-	-	4222	1	0	-	-	-	-	-
170	M292T60	292.177	1.00087	8219.73	5793.52	7684.53	5563.97	7890.3	6621.95	1020.99	1164.42	2642.7	2181.05	974.888	610.36	2132.74	2273.32	3119.46	3316.33	1910.14	1400.9	4713.42	3547.98	5340.75	1459.5	2343.5	3105.47	1467.8	5985.79	2752.92	2305.97	6430.46	5459.41	8091.24	7768.22	7598.95	2471.59	1546.93	2308.26	-	-	4875	0	0	-	-	-	-	-
171	M293T1020	292.876	16.999	1207.62	1409.35	941.859	686.4	1205.02	2071.76	2072.59	982.998	1546.13	1525.35	1805.35	1482.18	1379.67	2027.9	1548.33	1771.56	1363.33	1063.26	1352.89	1766.41	1567.68	1954.5	1504.25	1531.51	1390.72	1321.44	1733.56	1352.15	1442.24	2334.01	963.8	1579.36	1257.14	809.287	791.879	1004.96	-	-	4907	0	0	-	-	-	-	-
172	M293T150	293.211	2.4972	10589.5	11460	12447.1	4883.84	4510.94	3671.52	2427.98	5006.26	3846.24	3446.86	4517.21	5004.54	2724.79	5615.32	4505.51	3576.3	3576.12	4052.01	3632.83	5248.5	3789.29	3681.39	4307.73	4931.66	4265.29	4168.14	4669.62	14278.9	9472.94	11405.3	7238.45	7371.02	6912.89	10296.2	12531.6	8880.62	-	[M+H-H20]+ 310.215	473	1	0	-	-	-	-	-
173	M293T189	293.21	3.15803	75258	67608.6	74111.3	22894.9	26645.3	25596.5	4417.76	5350.86	6826.24	7832.71	5663.72	3811.1	5119.09	4256.26	5170.38	3914.58	3857.5	3195.3	3919.27	4241.38	4454.11	4002.81	4473.38	4907.21	4044.5	13757.7	8672.17	7059.55	6046.62	10025.8	7474.44	8496.19	9540	9979.54	6319.51	9038.14	-	-	311	1	0	-	-	-	-	-
174	M293T65	293.211	1.07587	20613.4	33420.4	43863.2	14302.4	9996.95	11179.9	3393.58	2527.44	2972.85	3419.86	2391.98	2764.5	2854.63	2756.85	4042.99	3223.67	2340.56	2313.9	3006.86	2832.92	3705.38	2715.85	3615.92	3072.11	3193.16	3446.02	2258.19	2620.55	3009.91	3394.22	2932.5	5046.96	2487.41	2578.38	3850.46	2007.82	-	-	4223	1	0	-	-	-	-	-
175	M293T268	293.247	4.4611	6316.54	7775.05	8668.42	6108.65	7075.34	3215.45	4781.7	5529.8	6370.26	4985.34	4146.08	3843.95	4458.67	3137.22	4110.49	4120.61	3204.17	5744.94	8652.79	7997.48	10481.7	11488.3	7901.19	8775.48	13184.9	14972.5	4929.42	7175.21	7994.01	5847.28	9651.52	13527.6	12418.7	7674.22	8370.52	8018.83	-	-	4455	1	0	-	-	-	-	-
176	M293T348	293.284	5.80513	2645.47	2917.25	1728.17	8407.87	8446	12547.5	3237.66	1809.24	3008.38	2696.21	3046.5	2102.07	1488.73	1546.23	1536.86	2391.01	1582.07	836.127	7092.49	8306.06	7649.41	9723.08	11285.3	10543.2	7704.48	7654.51	8544.72	9876.17	7652.55	6260.07	7531.19	6042.22	7741.63	2940.75	3625.34	3263.26	-	-	2101	0	0	-	-	-	-	-
177	M294T66	294.204	1.10818	2684.84	4065.12	4073.51	1473.57	1928.96	4578.01	1458.16	1342.04	1376.96	2781.38	1405.79	1696.29	1264.19	1308.38	1098.79	1405.96	1406.94	1545.87	1211.87	1121.35	1659.86	1066.71	1066.29	1325.87	1944.48	1284.92	1737.95	1732.5	1503.43	1347.18	1391.95	1160.82	2763.31	1848.88	1963.41	1418.09	-	-	4429	1	0	-	-	-	-	-
178	M294T257	294.241	4.28627	3721.17	9574.67	5531.85	7505.86	5852.22	7579.38	23461.2	16880.9	10562.3	18432.9	12509.5	10719.5	14349	10625.5	9835.74	11867	10321.8	11272.5	7925.34	18253.1	6673.26	11461	13509.2	11259.5	9663.88	4768.52	9215.2	10253.6	11043.5	13754.2	7133.15	15585.4	13175.7	11592.3	30157.9	12513.6	-	-	4811	1	0	-	-	-	-	-
179	M295T40	295.129	0.67115	1382.36	1051.39	1137.78	756.248	901.652	790.194	6008.62	15520	6241.38	926.456	930.877	801.423	2135.41	9142.58	3259.14	3688.62	464.825	568.041	716.116	760.953	942.83	10584.9	10963.5	1986.91	1348.76	1647.13	4278.23	832.564	688.667	654.863	686.36	597.719	611.665	2472.2	9008.06	1996.55	-	-	2570	1	0	-	-	-	-	-
180	M295T312	295.194	5.19352	6013.45	4012.07	6051.15	4753.22	6997.85	5102.04	3781	4349.45	3201.11	4411.7	4022.5	5234.04	2901.73	2758.12	4120.78	3674.03	2176.81	4188.9	5820.86	5786.39	5408.13	7840.47	7927.78	8915.27	4227.49	6765.12	5445.6	6242.14	4667.77	5169.53	4791.65	3888.99	5159.57	4790.63	4599	3797.49	-	-	1443	0	0	-	-	-	-	-
181	M295T204	295.227	3.39277	56638.4	55491.9	59810.3	32968.9	97112	30570.2	18121	17987.6	27064.1	17838.7	18657.6	20566.1	18291	21076	28768.8	26811.2	12842.1	16805.8	39812.2	38707.7	44112.4	45204.7	44827.4	41446.9	52487.7	30916.5	38538.1	70457.1	42881.5	47804.2	51665.4	50932.7	50912.4	46442.3	62181	41364.3	-	-	3930	1	0	-	-	-	-	-
182	M295T278	295.227	4.6353	3601.68	2901.19	3664.59	14825.5	16523.2	18361	5204.53	6813.81	4071.87	4457.76	3573.85	3917.48	4793.35	6745.71	3026.06	5992.51	2900.55	2789.41	8873.01	10058.1	11792.9	5573.67	7826.2	9308.38	6927.02	8889.45	8696.04	11335.2	7835.3	5070.3	8409.37	8540.21	9859.7	6665.84	14137.1	6310.66	-	-	3384	1	0	-	-	-	-	-
183	M295T106	295.227	1.76905	8616.26	16079.5	17743.9	8682.49	13176.3	12175.3	2058.96	3238.58	8024.06	2848.91	2051.36	1846.8	2422.84	2535.1	2796.82	2606.51	1861.03	1921.23	4667.92	6450.99	5032.01	4680.03	4061.88	3925.64	6671.96	6335.49	4300.98	9703.4	6650.18	5648.43	9270.24	10895.3	9687.58	5907.81	5736.37	4767.03	-	-	4534	1	0	-	-	-	-	-
184	M295T63	295.227	1.05808	19730.9	17457.5	16903.9	9007.51	12333.7	13272.4	2195.67	2106.44	2112.49	1848.47	1570.03	1692.16	1899.74	1969.95	3076.21	2356.14	1473.97	3002.29	2373.41	2539.25	5431.76	3363.45	3511.94	6810	3714.49	3356.5	2303.77	2549.11	2157.13	2163.22	2615.32	2596.7	2756.7	3018.66	2453.14	1971.78	-	-	319	1	0	-	-	-	-	-
185	M295T305	295.263	5.07762	33355.4	48314.9	42916.1	39950.5	60968.9	33510	46859.7	34638.3	34190	32968.5	34440	31825	56143	45470.3	38359.9	29946.4	36859.8	37846.6	31543.1	34021.5	53843.7	33129.8	66302.3	36929.3	46379.6	33782.9	32197.6	36053.9	34887.3	45604.7	39397.8	31227.8	35791.2	49614.4	46650.9	34300.2	[21][M]+	-	2562	1	0	-	-	-	-	-
186	M296T45	296.135	0.745908	1477.78	1666.11	2120.88	1369.86	657.531	1510.28	1720.88	3826.58	1882.33	1159.1	1168.97	1225.27	1978.76	1540.45	2431.88	2102.61	774.449	625.671	649.802	710.585	896.604	2444.22	1806	728.014	1084.17	1506.65	894.744	1243.22	1168.16	1028.21	1506.4	1454.95	1192.12	1153.58	2253.77	2795.51	-	-	263	1	0	-	-	-	-	-
187	M296T68	296.221	1.12638	4938.66	3498.08	3431.79	2958.31	2855.73	4260.97	1481.01	1074.39	1015.55	1336.4	928.746	651.139	931.905	1105.56	1303.28	683.781	1212.12	842.217	1351.95	505.206	877.965	821.19	741.545	2119.11	905.15	970.892	1693.96	941.156	1257.22	838.08	628.271	903.894	999.916	664.268	794.312	1084.2	-	-	4868	1	0	-	-	-	-	-
188	M296T204	296.23	3.39437	12025.7	12346.1	13790.9	8585.91	21919.1	24368.1	5146.5	5708.86	5440.23	3947.56	6303.03	4449.67	3262.65	3173.5	6952.01	6241.49	3128.74	4427.56	9075.89	8707.98	11162.6	9269.18	11537.6	9699.24	11649.9	10567.2	7148.22	15920.8	8645.72	7599.39	12857.1	12829.2	12649.7	11391	13411.4	11224.3	-	-	409	0	0	-	-	-	-	-
189	M296T207	296.258	3.45755	1685.9	1496.52	1452.37	3781.55	3370.77	3034.17	2386.02	2827.71	3527.2	2728.11	1330.11	2154.12	1639.46	1227.66	1815.37	2034.09	1677.42	1765.48	2280.28	2402.2	4093.91	1436.06	4096.93	3506.52	2329.86	3251.54	3040.87	2854.28	2332.37	2578.66	3642.24	3896.72	4582.44	1918.98	3976.25	2942.53	-	-	3958	1	0	-	-	-	-	-
190	M296T305	296.267	5.08238	9428.82	7881.09	7142.38	5572.21	9690.05	9627.99	10682.9	9406.02	8044.5	11422.3	8336.92	8955.02	10544.3	8147.2	9824.3	7228.22	8644.87	8532.18	8187.05	8405.65	10577.8	9399	12816.4	9371.16	12718.7	7824.51	6966.67	8966.83	8107.44	9651.72	9054.6	6252.05	9005.3	8048.05	9731.53	8001.95	[21][M+1]+	-	2562	0	0	-	-	-	-	-
191	M297T229	297.243	3.8138	15883.8	15296	14816.3	20594.4	18753.5	21516.1	7383.61	8189.8	14990.3	7380.24	7004.83	6233.45	7227.22	6827.01	8469.2	8717.8	6979.02	6550.81	30838.8	29090.3	29230.8	42229.7	37792.2	30013.6	41257.2	42719.7	42397.3	46378.6	38657.1	32199.4	65699.2	67021.7	64002.3	47379.3	32941.2	32556.4	[22][M]+	-	330	1	0	-	-	-	-	-
192	M297T387	297.279	6.44769	2223.84	1770.07	2458.09	2432.4	3457.17	3791.88	2513.04	3089.57	1534.59	1576.01	3760.79	2369.93	2032.67	1250.22	2522.44	1585.23	1769.35	2264.69	1895.96	2113.59	2656.6	3068.79	2184.82	2953.53	2265.23	3141.52	2794.12	2198.08	2126.34	2930.49	2039.69	1874.76	1365.47	2099.39	1879.65	1996.29	-	-	496	1	0	-	-	-	-	-
193	M298T45	298.097	0.746467	2921.19	3742.28	3096.01	2394.53	2051.86	2865.43	1674.03	1029.92	1576.44	960.906	919.609	1185.69	1154.38	1368.31	1443.65	1057.75	863.148	824.724	1067.11	703.751	1129.4	2984.04	1544.62	2035.18	1427.4	1087.24	933.768	1168.54	866.658	1212.2	1029.92	1018.62	1208.32	963.136	1155.26	974.4	-	-	3810	1	0	-	-	-	-	-
194	M298T67	298.178	1.10907	1447.14	1539.04	2292.18	2183.86	1914.59	1913.7	2697.92	3044.71	3044.15	2696.86	2410.23	2373.53	2720.83	3046.55	5157.6	2599.08	4014.95	4048.02	2482.55	2263.18	2586.22	3289.44	3362.54	3161.78	2211.67	2619.57	2948.54	2277.44	2642.75	3088.5	1878.86	2158.48	2079.71	2107.24	4288.63	3956.75	-	-	370	1	0	-	-	-	-	-
195	M298T44	298.178	0.731	11935.8	10636.7	12119.2	5489.52	5471.47	4020.28	10376.3	8950.32	8707.76	7172.39	5531.14	6444.9	7080.88	10299.6	9391.21	10280.3	6278.76	7176.29	8399.41	6383.68	13846.1	11783.8	10028.2	9491.89	5519.48	8344.8	10610.3	6231.96	6282.36	6285.68	4911.55	5405.32	5166.61	6964.63	7972.09	9188.35	-	-	3821	1	0	-	-	-	-	-
196	M298T1003	298.178	16.7175	2693.09	3238.78	5633.33	5874.97	3185.7	3586.37	3186.2	3213.33	3225.78	3101.04	3454.17	3697.2	2484.64	4092.22	2207.52	2967.03	2379.02	3181.3	2968.37	1127.61	3098.3	3292.68	4255.82	3151.51	2634.36	3660.78	4205.21	3289.97	3238.87	3515.9	2943.1	3404.6	2948.82	3720.33	2322.99	2820.74	-	-	553	1	0	-	-	-	-	-
197	M298T229	298.246	3.82162	2917.43	3539.12	3651.5	6409.1	5681.44	6897.78	2517.27	2788.38	3819.67	2292.6	2323.92	2690.41	2511.27	2522.87	2214.12	3078.11	2688.67	2388.61	6944.91	7466.31	7502.61	9865.23	9498.94	6945.84	9294.27	7359.28	7566.76	10465.7	8961.84	7561.65	16404	14800.4	15667.7	7104.34	6718.48	7256.05	[22][M+1]+	-	330	0	0	-	-	-	-	-
198	M298T238	298.274	3.96857	17165.6	16952	15610.9	45846.4	53968.1	62871.4	18541.1	23109.1	22021.5	22366.3	13921.1	11280.1	15373.3	13563.2	12266.1	14174.9	11542.7	13888.9	23381.6	25057	23624.6	28001.9	29904.1	36453.1	35391.5	29688.6	18661	24336.7	16625.1	23312	22750.9	29265.5	20900.9	12919.1	7804.59	11628.8	[23][M]+	[M+H]+ 297.267	285	1	0	-	-	-	-	-
199	M298T297	298.274	4.94329	7456.52	10860.5	9104.46	5945.47	7560.91	10799.6	4029.02	4059.03	4252.61	3424.44	4141.28	2844.29	4791.13	5329.99	5757.9	3651.12	2995.31	3044.72	8442.58	8605.84	9991.07	13213.9	12078.7	10484.9	8900.73	7993.07	9169.89	8742.66	6546.79	5188.98	8851.44	8863.14	9856.37	4308.04	4749.12	5958.9	-	-	3274	1	0	-	-	-	-	-
200	M298T337	298.31	5.62017	2232.07	1803.56	1886.63	1856.98	1607.56	1042.05	1774.88	1318.09	1210.55	2019.09	1721.78	1075.41	1621.05	1288.67	1820	1300.13	1396.33	958.961	1284.5	1052.91	1355.45	1608.62	2431.35	1415.56	1723.51	1175.28	2237.38	1420.89	1753.54	1370.25	2763.84	1448.85	1387.02	1258.66	1315.45	1266.43	-	-	4113	1	0	-	-	-	-	-
201	M298T326	298.347	5.43891	1737.74	2002.49	2034.39	1641.8	1908.32	1374.22	2964.24	2032.18	1839.15	2389.61	1342.77	1938.13	3440.99	2769.43	1841.74	2935.95	2107.4	1827.55	2254.7	1214.5	2116.66	2995.34	3495.61	3038.82	4094.29	3721.98	2251.54	2042.63	1307.45	2127.85	2061.85	1296.07	1428.13	1752.96	2189.08	1534.93	-	-	4775	0	0	-	-	-	-	-
202	M299T54	299.183	0.897458	2472.38	2690.33	2568.7	1147.97	1463.12	1183.33	2162.26	4204.97	1925.06	932.56	934.282	926.105	1155.79	2451.65	3295.6	1209.47	1147.39	656.866	2391.35	2474.17	2893.54	1475.61	1436.65	1862.19	3080.78	2829.99	623.221	2296.59	1597.58	1878.98	1535.02	1479.39	1478.27	2610.38	5631.96	2576.33	-	-	512	0	0	-	-	-	-	-
203	M299T250	299.258	4.16992	2550.12	2791.42	2211.16	7138.92	7919.44	5134.31	5483.95	9836.16	14020	5620.26	12102.7	6683.47	11028	7178.15	7030.72	14010.3	5793.53	4410.03	10182.8	11618.1	13274.9	12262.4	13041.2	9185.6	14474.2	9418.64	9194.45	11176.1	14660.5	10525.6	13105.6	12458.2	11554	16453.3	13829.7	10678.3	[24][M]+	[M+H]+ 298.251	4062	1	0	-	-	-	-	-
204	M299T194	299.258	3.23103	941.612	1586.17	950.895	1690.92	2081.77	1420.42	2026.23	2140.64	2254.75	2229.38	2067.01	1866.56	2739.17	1880.62	2911.91	1998.14	1244.08	2713.85	1951	2051.42	2475.94	1699.37	2113.7	3365.62	2477.57	1421.27	1513.27	1816.33	1470.18	1686.05	1540.55	1294.8	1324.26	1452.26	2289.41	1763.5	-	-	4773	1	0	-	-	-	-	-
205	M299T376	299.273	6.27192	10671.2	13631.1	15897.1	5415.53	8107.23	7699.39	2918.03	911.066	2051.89	2133.71	2618.88	2536.2	3263.72	2326.83	2587.98	1160.28	1511.02	1783.87	3918.5	3860.18	2944.9	3352.38	4170.45	4012.17	2998.66	3857.52	3609.46	1785	3759.38	3858.1	5226.16	2426.51	1535.8	4531.59	1806.61	4072.99	-	-	1905	0	0	-	-	-	-	-
206	M299T238	299.277	3.96733	3823.15	3621.69	3936.46	9612.12	18463.6	11172.9	6028.65	4624.34	5743.81	3290.48	3152.9	3791.23	2273.42	2837.63	2078.78	5059.07	1924.64	3356.82	4580.54	6496.84	5503.66	6656.74	6726.12	7625.58	10022.8	6613.06	2247.99	5250.42	3468.13	5292.37	7012.92	5057.1	5728.26	3303.63	2463.23	1870.61	[23][M+1]+	-	285	0	0	-	-	-	-	-
207	M299T616	299.274	10.2659	25482	15269.2	20809.6	2985.38	6726.99	10047.2	3242.2	3034.57	2897.97	2123.22	1644.79	3258.99	1891.73	1968.73	4735.75	2572.92	1547.31	1465.12	2685.94	1935.18	2723.2	2797.39	2654.9	2548	2584.56	3370.56	1174.67	2713.35	1110.83	1721.57	2318.32	2229.78	2165.51	2570.89	2260.93	1730.81	-	-	2520	0	0	-	-	-	-	-
208	M300T250	300.261	4.16593	2877.31	3587.95	3429.27	2934.78	5766.27	7798.13	1095.15	2083.39	2862.17	3387.68	1503.26	2321	3562.12	1971.7	3226.64	3342.74	1118.57	1624.46	2122.04	2542.33	2129.55	3171.52	2315.71	2677.06	2422.22	2074.56	2733.77	3087.55	4276.33	4535.54	4010.64	2744.69	3558.63	2688.69	3446.52	4682.92	[24][M+1]+	-	4079	0	0	-	-	-	-	-
209	M300T293	300.29	4.88614	84336	73232.6	73525.8	107354	57329	62825.1	81445.4	35958.4	43397.8	81301.9	58756.7	44309.9	57837.7	32415.5	37921.6	40533	44462	32697.8	31133.3	37459.8	30956.8	48429.6	47239.6	56371.5	44710.1	65122.6	110154	31286.7	23191.6	24032.5	86871.7	87113.3	75722.8	108260	19786.2	31407.4	[25][M]+	[M+H]+ 299.283	266	1	0	-	-	-	-	-
210	M301T62	301.072	1.03563	31317.5	1756.37	1063.6	1509.4	1793.53	2381.36	6657.04	2677.28	5221.38	2480.08	3149.95	1600.92	1696.24	1706.12	3675.42	38708.7	45631.1	1300.36	3081.88	1938.86	1856.99	3365.36	3352.62	4692.56	2387.88	3500.63	2172.31	2303.68	2201.42	2350.95	2640.59	3100.68	2958.1	1968.9	1214.3	1478.61	-	-	4305	1	0	-	-	-	-	-
211	M301T317	301.075	5.28589	34229.4	30527.6	33413	4973.69	2486.23	3690.28	3434.48	3507.21	5077.91	6111.15	3507.5	3557.29	7489.61	3018.62	3217.89	4323.43	3003.03	2776.2	7110.52	3125.01	3722.22	3939.92	7473.24	25158.1	27170	3276.5	3677.94	4575.72	28536.3	4515.94	3225.81	32354.3	24798.4	6208.41	3904.06	5567.19	-	-	4404	1	0	-	-	-	-	-
212	M301T223	301.142	3.72371	123530	141241	131876	122383	212967	129587	135165	170508	131995	129336	126364	133059	135397	134757	128554	126025	129146	135894	144044	154095	334676	142122	135623	141585	134824	138199	146459	135290	148603	139622	131226	196334	128282	135891	137327	130368	-	-	4273	1	0	-	-	-	-	-
213	M301T206	301.214	3.44031	2858.04	2111.54	2032.71	3808.92	2943.64	2329.99	1836.68	2910.15	3032.36	1940.16	1845.14	2791.1	3096.06	1777.15	1752.91	2770.3	1045.47	2042.78	5890.07	7004.6	6411.31	4500.87	4453.22	4171.29	6936.49	6507.09	5415.84	6095.39	6677.14	4550.63	8761.46	8913.52	8554.49	6066.42	4616.29	4194.72	-	-	2932	1	0	-	-	-	-	-
214	M301T311	301.212	5.17937	21135.7	26542	22348.1	23564.8	19838.7	21035.4	13437.9	12224.7	11188.6	10600.9	13754.6	11111.5	14314.6	7311.65	13595.5	12336.6	10551.4	15366.7	28884.2	29689.4	28232.6	31769.3	26712.8	32063.8	22598.2	28747	25020	26067.9	21458.5	26718.4	21897.9	23105.7	25456.2	16051	20546.4	20647.9	[26][M]+	-	1398	1	0	-	-	-	-	-
215	M301T293	301.293	4.88614	18072.6	16599.8	16490.6	22972	14419.9	14432.2	15860.4	7772.72	9653.96	17896.9	11125.1	10000.4	11929.1	8611.43	8406.12	7030.36	9064.81	5650.68	5973.63	6279.53	6422.38	10791	10892.6	13521.7	11531	14010.3	22532.9	6067.08	4829.75	6457.04	18990.2	19850.8	18247.4	23893.7	4890.23	7618.71	[25][M+1]+	-	3835	0	0	-	-	-	-	-
216	M302T312	302.215	5.19337	4208.64	7218.68	4712.61	5734.75	4053.74	5267.4	4596.44	1705.33	3157.98	1785.47	3332.74	3425.06	3010.32	2501.01	3630.04	3251.56	2721.31	3585.49	7757.18	7025.89	5102.62	6216.6	7612.52	8208.47	4357.9	5910.19	6243.37	5405.51	3329.49	6431.85	4256.72	3303.65	5699.38	3693.72	4970.38	3890.28	[26][M+1]+	-	1437	0	0	-	-	-	-	-
217	M302T286	302.245	4.76255	3528.24	5657.4	5278.41	2480.25	4619.68	8445.38	3386.06	4585.67	4846.62	6534.99	5600.92	4962.9	4103.83	3130.2	4261.27	4116.12	4067.33	3685.77	2455.49	5470.3	4983.33	2693.63	3826.37	2870.97	5117.82	3493.24	5482.34	4544.79	5909.12	3122.29	4021.16	4709.23	6410.38	7929.33	4550.62	5726.9	-	-	3308	1	0	-	-	-	-	-
218	M302T293	302.295	4.88132	3966.38	3344.41	2258.23	3262.64	2151.39	2466.04	3214.14	960.038	1133.07	3236.17	1942.7	1291.83	1611.52	1425.27	1294.34	1149.92	1178.17	813.05	1100.48	1637.4	1692.29	1812.02	1465.79	1823.8	2590.31	3079.34	3164.55	1474.77	922.26	820.129	4165.06	2528.51	2958	2814.95	1133.33	1277.89	[25][M+2]+	-	3835	0	0	-	-	-	-	-
219	M302T261	302.306	4.35487	8118.34	8878.67	8121.16	10257.9	8448.67	11357	2198.29	2137.74	1459.44	1548.94	894.902	1194.56	1367.33	893.28	1151.98	779.462	1050.42	1095.51	2041.21	2300.89	2222.8	2916.49	3282.32	2694.16	2023	2623.52	2077.96	1961.84	1342.27	1276.1	1480.12	1360.54	965.617	2247.75	1741.24	1355.03	-	-	4083	1	0	-	-	-	-	-
220	M303T1019	302.905	16.9902	1012.88	1491.6	1153.5	1584.75	1460.48	995.267	1159.08	831.62	1590.87	1504.35	1056.12	1500.41	1563.82	1856.76	2940.81	1365.76	2016.6	1482.8	2410.49	2066.92	2421.27	1379.86	1125.52	1367.2	1709.33	1560.18	1614.46	2214.97	647.226	652.189	1177.53	1757.27	1773.11	1284.61	875.366	2291.94	-	-	4908	0	0	-	-	-	-	-
221	M303T307	303.289	5.12163	6288.59	11182.7	6864.25	2963.92	8213.29	5173.62	4195.39	8119.9	6908.97	5132.87	8141.77	5892.64	11796.4	7696.22	6937.23	7650.36	6573.9	6137.34	7430.64	9909.85	9196.23	7096.13	7244.85	8292.05	9971.57	6822.67	6570.26	5259.23	7494.79	9511.24	5932.76	6511.44	6874.2	5387.96	4949.47	8732.36	-	-	4646	0	0	-	-	-	-	-
222	M303T386	303.305	6.43367	1684.36	887.808	441.709	8910.67	7473.42	8924.94	3835.57	2957.63	3822.96	3470.66	5145.77	2613.1	2720.21	2394.21	2610.42	1985.74	2937.05	2318.14	7643.9	7017.23	8721.01	11612.4	12436	12052.7	8804.83	7577.33	11338.3	7968.91	6288.5	5470.02	5516.52	6877.42	6011.3	3243.42	3781.54	4042.24	-	-	160	0	0	-	-	-	-	-
223	M303T370	303.305	6.17402	6605.29	11296.6	6939.37	4118.16	7363.67	5551.64	5714.88	4995.95	6230.55	6895.08	6435.88	4533.06	8581.99	5271.5	4188.3	6098.5	4438.71	6766.33	6559.44	4778.94	7088.42	4683.47	8671.28	6349.97	8589.53	4938.35	5601	4485.8	5560.88	7689.79	5596.78	5015.24	4684.36	5390.44	6071.47	4782.2	-	-	2057	0	0	-	-	-	-	-
224	M304T306	304.261	5.10387	8171.71	5449.07	8447.94	15584.7	23284.8	28013.2	12428.9	12602	8787.1	12913.1	16475.9	7196.61	12332.6	13763.9	8870.59	12890.2	13359.5	9458.18	9973.06	10356.4	8174.66	11430.4	13709.6	13597.9	12630.2	13905.1	13946.7	11526.3	10788	11878.4	10776.9	13221.5	11943.3	10073	8805.73	11772	-	-	3188	1	0	-	-	-	-	-
225	M304T206	304.299	3.43562	1207.73	862.206	1023.37	1695.3	1409.76	1322.88	1085.98	1329.85	977.478	750.154	1531.56	782.689	1444.24	1450.17	1019.9	943.261	1697.39	737.313	2026.5	894.037	1882.38	2637.39	1460.47	1640	1553.94	890.243	1806.56	1723.89	1215.42	1086.98	2611.52	2777.41	2244.2	1216.59	1806.82	1110.78	-	-	2925	0	0	-	-	-	-	-
226	M305T489	305.138	8.14911	2493.75	2504.09	2863.63	2409.78	3646.4	1353.52	3159.23	2294.98	3575.29	5106.07	1414.89	2203.83	4078.83	1738.05	1706.76	2800.85	2531.28	2586.94	1348.88	3771.14	2587.21	3540.58	5678.85	3977.6	2132.03	3530.93	5878.83	2508.51	1961.62	2428.04	1092.56	1809.96	875.086	1385.21	1779.33	1600.62	-	-	1661	1	0	-	-	-	-	-
227	M305T306	305.264	5.10477	2743.06	2453.71	4643.04	5290.95	4860.84	5759.54	3684.24	3698.47	4315.49	2765.21	3445.74	3221.11	1834.02	2786.03	2793.51	3687.7	3477.79	2781.13	3445.65	2758.25	2564.28	3561.84	3862.81	3584.25	3844.6	4534.37	2855.28	2046.62	2826.64	2104.65	2808.62	2699.54	2785.54	2253.65	3840.88	2685.88	-	-	195	0	0	-	-	-	-	-
228	M306T45	306.192	0.745283	2779.28	2814.37	3314.29	1714.73	2822.54	1756.68	2275.08	1415.9	2461.82	1664.87	1066.53	1464.55	1904.13	1999.47	1461.23	2124.58	1013.9	980.161	1786.53	1867.11	2625.57	1742.94	2550.41	1181.25	2562.21	2602.91	1566.31	1345.63	1864.55	1850.32	1428.8	1622.41	1886.57	1533.81	2301.01	2150.85	-	-	3822	0	0	-	-	-	-	-
229	M306T389	306.279	6.47772	22497.3	22344.4	20495	5755.26	6694.77	12565.6	875.609	3023.09	1002.87	1138.38	879.97	1250.58	937.307	905.091	681.576	848.348	808.584	809.325	12788.1	11828.1	15922.1	14504.7	13695.1	19486.2	14670.8	11985.4	9995.28	12151.3	5915.08	6094.64	6055.11	5859.16	4356.39	5773.18	4300.39	5022.75	-	-	1324	1	0	-	-	-	-	-
230	M306T592	306.28	9.87441	28107.9	40343.5	25812	18136.8	22791.3	40867.3	10538.7	22904.5	7152.07	7072.92	7904.11	6951.36	1794.57	3350.39	5159.08	2731.92	2247.19	2985.6	92636.5	86990.8	61261.7	41773.7	80188.3	75068.7	83787.2	64839.7	71564.2	64554.2	33115.3	35863.1	25634.1	24816	30917.8	40116.1	42470.9	53525.4	[27][M]+	-	3999	1	0	-	-	-	-	-
231	M306T375	306.279	6.2432	21816	23267.9	24559.6	6837.01	10163.2	16797.4	990.134	1117.61	1327.95	1323.31	1982.52	974.079	771.942	794.684	1100.09	1125.08	1093.77	497.478	9509.3	8386.76	7981.94	13086.7	11252.3	15968.9	6006.08	7839.22	8894.48	14422.1	2662.54	8546.35	7009.14	8019.17	6893.46	7417.49	2341	3625.4	-	-	262	1	0	-	-	-	-	-
232	M306T331	306.277	5.51108	2355.05	2903.4	2608.01	5170.85	5136.56	6747.98	3881.88	3007.87	2602.88	4090.84	3402.13	2363.13	3968.61	3220.36	2533.94	2635.1	2978.17	2835.9	2245.24	2159.43	3214.72	2935.71	2973.35	3133.81	3161.16	3073.74	3472.91	2541.45	2636.6	3505.16	3061.45	3015.79	2807.45	2268.85	4605.78	2838.46	-	-	4197	1	0	-	-	-	-	-
233	M306T572	306.28	9.53987	75608.2	68337.7	65846.1	24230.3	31979.5	47761.6	4049.14	8375.87	4518.35	4594.28	4690.6	1714.87	3358.69	4374.99	4090.69	2259.74	817.795	1574.16	76730.1	38497.3	57478.6	39849.8	60296.2	31139.3	70302.2	60038.4	52224.3	36619.8	30163.4	34558.3	42559.3	37823.3	39009.8	64236.2	17605.6	35199.6	-	[M+H-CH2]+ 319.308	226	0	0	-	-	-	-	-
234	M307T1014	306.852	16.8952	3217.08	4259.59	3535.48	1983.6	3187.15	1950.4	3064.84	2333.32	2590.14	2657.78	2615.94	1890.43	1969.65	2156.88	5224.12	1509.2	1540.37	2257.2	3595.6	4765.96	1150.98	2511.95	1439.42	1553.2	2650.21	2527.8	933.331	1869.13	2583.68	1506.51	4935.84	920.211	1446.11	4277.86	1059.48	2308.19	-	-	4905	0	0	-	-	-	-	-
235	M307T41	307.102	0.679975	2928.03	1897.13	2167.2	648.696	2796.73	1500.55	14030.1	19028.1	16347.9	1114.2	839.597	986.116	2595.27	10234.9	3455.49	5528	651.471	648.907	1071.45	814.648	782.119	21477.2	28184.7	5156.21	1687.43	5057.98	8291.64	1533.11	858.818	842.947	651.305	1118.41	1269.13	2873.28	8894.84	3526.18	-	[M+H-CH2]+ 320.128	127	1	0	-	-	-	-	-
236	M307T424	307.19	7.06196	6583.38	3944.81	3564.54	3163.27	3566.39	3516.56	3361.58	3582.28	3799.05	1880.2	2253.74	4366.68	3209.93	3669.08	2106.81	3455.74	2294.68	3867.71	2981.14	5708.63	5056.83	3917.27	2834.89	3599.62	5106.42	3552.62	4638.11	2982.6	2898.04	3685.21	3746.21	3258.64	3268.8	3114.3	7417.6	5655.17	-	-	884	1	0	-	-	-	-	-
237	M307T302	307.24	5.03367	9000.34	19968.6	12348.1	12793	20248.4	12952.7	17089.3	10577	12166	18523.2	14088.2	13788.3	23119.3	25964	15769.3	14139.4	8394.56	17195.5	16394.2	13935.6	18292.4	17472.2	16434.1	13643.2	14101.6	15933	9037.06	24134	16145.8	21922.9	14439.1	13989.1	12223.9	20288.6	21230.4	11593.6	[28][M]+	-	4676	1	0	-	-	-	-	-
238	M307T281	307.263	4.68277	3690.42	5545.05	4769.05	3492.26	3955.48	4459.24	3248.68	3897.67	3824.61	3079.08	3535.33	2854.36	1700.91	2262.82	1765.27	2280.14	2374.37	2255.28	4797.15	6803.86	5999.86	6449.59	6160.4	7420.04	8129.82	5513.05	4530.88	9846.72	6011.19	5881.23	2900.9	4140.99	4535.28	7635.17	9745.11	5635.64	-	-	2618	1	0	-	-	-	-	-
239	M307T592	307.283	9.87019	8391.29	7290.19	7818.69	4657.63	6710.54	11237	2475.87	5271.69	2505.91	2196.74	1533.82	2317.61	1353.37	1344.93	2027.76	1679.63	1435.15	1296.58	21186.4	22506.1	22166.4	9493.58	19502.1	20331.3	22452	16869.9	19668.3	17145.1	8563.35	8774.74	6437.09	6702.82	8096.94	9979.16	10405.7	16035.4	[27][M+1]+	-	4000	0	0	-	-	-	-	-
240	M307T573	307.282	9.55335	17670.2	7073.67	16174.3	6792.23	7793.98	10395.6	1316.23	1522.42	1363.83	879.512	1850.9	601.007	484.175	1422.77	661.888	1183.49	415.708	1487.04	17384.2	8347.77	16733.2	11244.3	17475.7	12734.8	19019.1	11541.8	8802.81	15862.4	6544.99	11145.5	11795.3	13044.7	3945.07	15661.5	3942.46	9560.35	-	-	3714	0	0	-	-	-	-	-
241	M308T302	308.243	5.03138	1158.5	3499.54	2398.14	2674.2	2691.7	2476.61	2695.9	3014.85	1707.11	1612.9	4095.49	1858.08	3312.23	2572.43	2023.03	2167.01	3375.11	3819.92	2510.83	2201.9	2343.42	2137.61	4323.94	1765.22	4832.13	3174.29	2255.96	1349.7	3468.45	2912.32	4451.18	3363.36	2833.83	2660.46	3663.11	3530.63	[28][M+1]+	-	4675	0	0	-	-	-	-	-
242	M308T411	308.295	6.84549	16826.2	14595.1	20019.2	34041.9	23784.2	27118.5	18219.4	42508.8	33421.3	30128	21464.6	26425.7	15537.8	14829	17082.7	19694.1	11797.8	11995.1	63184.2	68641.4	56784.3	54102.2	52162.3	54984.2	59124.5	63054	46448.4	42782.9	32663.2	45737.7	16557.3	17860.7	25434.6	33232.1	19217.9	32435.7	[29][M]+	-	4146	1	0	-	-	-	-	-
243	M308T609	308.295	10.1516	32524.7	56169.8	50573.7	165882	114332	248473	179584	823313	458278	420157	207745	427528	218856	244513	475535	287785	92576.8	131163	257484	256098	488846	278965	224229	177236	166903	281762	215603	129705	129280	98747.6	38572.8	28922.7	40330.7	75107.2	116827	311392	-	-	1841	1	0	-	-	-	-	-
244	M308T593	308.295	9.88772	38364.5	40763.1	36933.8	42762.1	46116.9	75905.4	24617.5	54114.8	17116.1	22987.5	16543.5	15047.6	5961.23	6934.22	15402.3	8708.9	5080.93	9760.25	168671	168487	157812	82181.5	139983	137776	105080	133614	140974	63428.2	76955	68302.7	48804.7	44775.5	56636.6	85451.2	80746.1	104136	-	-	2683	1	0	-	-	-	-	-
245	M309T67	309.168	1.10862	1203.78	1367.75	7564.48	2928.93	2663.74	2919.22	4996.1	7848.68	2581.31	3493.41	1857.74	2081.58	1793.15	1600.43	1772.73	1240.07	1626.64	1320.76	16930.5	16294	18553	21978.3	22555	18046.8	31813	25500.7	8770.85	14732.7	8894.75	9679.97	6295.01	7755.24	6117.3	10014.1	5717.3	10684.9	[30][M]+	-	4421	1	0	-	-	-	-	-
246	M309T205	309.242	3.41151	2696.34	3837.22	2614.25	4280.49	2867.82	3542.2	2813.53	3020.57	2695.31	2780.97	2355.99	3193.81	1814.08	2905.06	2767.94	2814.29	2578.47	955.541	3409.01	3551.99	5261.42	3671.3	3477.8	3411.14	7875.99	4117.95	3828.87	5700.18	4549.56	3320.11	3439.2	3665.68	2293.56	3731.36	5094.45	3945.92	-	[M+H-H20]+ 326.248	453	0	0	-	-	-	-	-
247	M309T269	309.241	4.47922	15851.3	14920	15684.9	5918.63	4800.6	7510.79	6539.22	3394.84	3774.74	3267.46	5258.28	2349.73	5557.63	4288.91	4414.95	2566.52	4471.97	5344.62	3820.88	5919.83	4229.24	7551.91	2535.87	5294.8	5192.5	6963.69	3919.84	6027.53	5743.9	1805.52	5554.89	6575.13	2891.13	4643.99	3215.75	4592.24	-	-	4537	1	0	-	-	-	-	-
248	M309T301	309.279	5.0167	2685.38	3120.52	2068.88	4297.37	3013.27	3193.53	5328.28	4008.05	5315.38	3849.47	3571.91	3950.27	4359.32	2146.5	2181.76	2501.43	1941.67	2609.03	4237.73	4009.25	5289.3	4617.16	7505.74	9189.59	4468.84	2616.84	6406.46	4098.74	3777.63	3663.49	2140.03	2608.28	2870.05	2565.52	3344.6	2916.66	-	-	1975	1	0	-	-	-	-	-
249	M309T411	309.298	6.84722	3079.17	5291.34	5342.82	10480.5	7512.45	9014.49	4050.14	8505.57	7700.91	8061.31	6281.23	6090.27	3422.72	3124.47	4342.83	5095.17	2921.92	5883.37	16346.5	17140.4	22505.3	15402.6	13648	15069.4	15171.4	19249.6	14021.4	11514.5	7542.7	6547.72	4910.13	5337.78	4396	4934.37	4689.93	6593.46	[29][M+1]+	-	305	0	0	-	-	-	-	-
250	M309T609	309.298	10.1535	5737.06	14159.7	11369.6	40005.9	27269.3	40293.6	40416.7	180727	103086	100686	41051.7	94716.4	48585.7	54887.7	113845	65718.8	30131.7	28777.3	59053.7	51713.9	106786	42665.5	51085.8	46813	53035.5	64482.4	50596.3	31024.9	29705	21622.6	11386.1	6214.77	10837.2	25878.5	20424.4	48673.4	-	-	2802	0	0	-	-	-	-	-
251	M310T67	310.172	1.10877	5884.64	6502.72	6166.61	821.352	7214.82	792.988	1154.77	1268.99	3270.42	1068.45	2701.73	729.053	887.406	2897.17	2937.09	2604.98	3345.3	3511.92	3962.06	3154.31	3944.62	4949.83	4235.78	4184.11	6082.31	4579.87	1590.68	2874.16	2017.53	2151.84	1327.12	3438.83	1829.02	1782.04	1596.68	2280.38	[30][M+1]+	-	370	1	0	-	-	-	-	-
252	M310T42	310.165	0.700867	2423.55	3292.65	2271.02	2313.01	3810.86	2988.75	1643.4	1585.49	2108.4	1727.27	636.082	1455.62	1621.5	1979.21	1832.85	1031.79	1207.37	660.9	996.814	934.56	1289.17	2629.94	1985.78	1906.8	2265.07	1212.14	1387.17	1069.58	1177.93	1477.98	1330.04	852.968	1515.04	1393.51	1712.84	1054.62	-	-	4808	1	0	-	-	-	-	-
253	M310T609	310.302	10.1449	5734.49	6165.31	5625.47	6531.64	4821.18	6626.41	10472.8	27540.3	14767.3	14348.9	7741.63	14316.8	7594.66	7020.01	14835.9	8719.41	2730.11	4313.83	8693.46	9435.66	4997.77	4695.74	7243.45	6218.55	7684.35	6301.87	6311.78	6400.48	5154.8	2929.29	3896.91	3038.52	4574.29	6622.56	4270.24	10123.3	-	-	1843	0	0	-	-	-	-	-
254	M310T336	310.311	5.59774	20056.8	26464.9	21622.1	23664.6	26633.1	24757	27238.1	23265.8	20486.4	29349.6	21482.5	19807.6	27733.7	21802.3	24120.3	23841.9	24194.6	22961.7	20838.3	21341.3	28057.1	25852.1	32277.7	28044.5	33144.2	27866.8	23964.3	21306.2	21759.2	28225.8	23973	18403.6	21609.3	21305.3	24901.3	21402.4	[31][M]+	-	169	0	0	-	-	-	-	-
255	M311T277	311.164	4.62082	30025.6	62828	27869.6	26128.7	20088.1	26823.3	20794.6	38167.9	30205.1	27166.1	24407.6	21701.3	17577.9	22775.6	25541.7	39162.3	26414.4	22703.8	23434.7	24443	19295	21212.5	20181.2	22167.5	50419.2	23132.3	26662.1	21287.8	25014.7	61049.8	21592	21630	21056.1	21920.5	19430.9	21532.6	-	-	3022	1	0	-	-	-	-	-
256	M311T150	311.222	2.49562	4730.51	5550.47	5718.46	2453.95	2615.6	2246.55	1502.67	2633.23	1812.58	1754.71	2213.43	2460.44	1468.81	1734.21	2527.92	1917.21	1656.19	2524.52	2646.29	1822.89	2147.87	1942.52	2273.93	2165.31	2504.8	2486.04	2144.97	5603.48	5064.41	6952.14	3465.06	3264.65	3133.16	4881.22	5424.91	4034.64	-	[M+H]+ 310.215	473	1	0	-	-	-	-	-
257	M311T190	311.222	3.16667	3077.52	3550.38	2995.16	2305.12	2387.25	1929.32	2091.78	1771.97	1679.92	1991.39	1369.88	1520.01	1953.39	1820.16	2111.58	1957.63	1372.07	2065.67	2109.99	3066.28	2271.86	1460.91	2140.89	1461.13	2107.17	2088.97	2092.28	4324.32	3270.41	4454	2219.1	2218.23	2582.13	2793.98	2891.16	2350.08	-	-	4182	1	0	-	-	-	-	-
258	M311T64	311.222	1.06498	20977	12868.3	14052.2	5782.94	8512.31	8834.76	1466.76	1213.57	1623.87	1822.66	1405.12	1410.32	1501.45	1439.39	1718.18	1582.84	1287.35	1232.32	1720.7	2192.45	1213.97	1864.18	1523.61	1989.08	2037.53	2378.71	1855.71	1273.45	1765.66	1471.91	1823.89	1981.04	1951.94	1728.49	1807.54	1529.66	-	-	4224	1	0	-	-	-	-	-
259	M311T281	311.258	4.68677	16164	28263.7	33340.5	26896.4	19884.5	13416.9	8807.9	20742.7	17418.5	27914	20009.4	12654.8	24510	6656.14	21254.8	14302.7	20952.5	21780.2	7093.52	7676.46	9210.26	20006	28175.8	21769.4	9277.67	22414.9	7512.51	10687.9	19764.3	9771.49	10369.8	20560.7	19329.3	7106.35	6175.97	18255.3	-	-	2619	1	0	-	-	-	-	-
260	M311T368	311.273	6.13265	11395.8	10301.8	10068.8	4197.85	7763.44	8230.58	2733.37	2112.41	2526.47	1675.23	1542.58	1342.79	1458.68	1144.82	1634.63	1596.3	838.095	972.276	1827.5	1997.63	4712.51	3182.41	4495.35	4937.01	3052.03	3601.07	3685.99	1735.38	1134.72	2500.56	1244.67	1952.04	1451.34	1589	1150.77	1754.38	-	-	3111	1	0	-	-	-	-	-
261	M311T348	311.294	5.80442	8981.24	6593.44	7947.91	36692.4	32277.9	46915.5	9456.3	5681.5	9496.52	7745.61	12612.4	7059.74	6584.19	4251.24	5778.69	6307.41	5908.64	5267.38	30074.4	23926.4	21080.5	35846.6	42047.6	41152.5	28433.1	31455.6	35249.9	28340.6	23665.1	22974.6	26161.2	25740.5	24929.3	11482.7	13610	17199.7	-	-	4365	1	0	-	-	-	-	-
262	M311T290	311.294	4.83975	6361.82	6382.02	4511.82	8058.11	14176.5	2669.87	11763.6	11350.6	2423.64	12454.8	12800	2339.99	12694.9	10521.2	5161.14	12455.9	11755.1	11801.5	11659.5	13215	3735.13	4022.21	5501.07	7344.15	15721.4	16663	17550	13831.3	3081.92	17316.1	5111.72	3314.93	3782.76	13769.1	3449.25	6615.99	-	-	1522	1	0	-	-	-	-	-
263	M311T336	311.314	5.59812	3926.55	5934.55	4960.33	4937.69	6225.34	6052.38	7148.54	4858.2	4904.96	7702.06	5328.48	4709.58	7275.79	6842.49	5551.71	5938.22	5825.94	5118.53	4779.3	4912.24	6528.92	5785.84	6932.79	5816.24	9070.2	7472.03	6460.33	4415.15	5110.83	6489.85	6339.29	4964.68	5208.41	4773.49	6601.98	5056.39	[31][M+1]+	-	2989	0	0	-	-	-	-	-
264	M312T277	312.167	4.61277	8453.12	12901.4	6574.49	9048.52	6617.71	6885.68	4659.15	7781.64	10352	4757.68	7002.14	5086.82	8534.91	5432.74	5810.2	8696.72	6640.02	4564.75	5497.01	6657.19	5982.12	7228.07	4604.95	4694.9	5008.68	6816.02	8518.21	6915.03	8846	3102.34	9943.44	6056.7	6137.55	3778.44	6890.75	5222.01	-	-	3028	1	0	-	-	-	-	-
265	M312T283	312.261	4.71479	3351.56	4084.61	5222.15	2463.84	6581.73	2648.22	2777.95	1848.3	2880.14	2987.35	2904.04	2672.53	4794.59	2619.44	1962.22	2024.85	3397.37	5456.27	4484.05	2813.96	4442.74	1918.26	2873.5	3993.85	3085.9	4476.21	4597.49	3658.92	3770.5	4163.39	1741.76	4172.59	3626.75	3029.4	5709.6	3672.13	-	-	4748	0	0	-	-	-	-	-
266	M312T348	312.298	5.80471	1506.09	2283.13	1836.09	9086.49	8742.2	12269.7	2973.66	1674.24	2735.53	2001.84	2869.4	2357.6	1823.98	1632.18	679.44	2013.63	1459.56	1751.62	6224.18	6427.05	7331.87	10274.6	9439.29	9785.72	6728.05	8296	9520.51	7186.35	6778.86	5413.59	7009.13	7581.74	6538.27	3332.23	3596.12	4391.23	-	-	2095	0	0	-	-	-	-	-
267	M312T366	312.326	6.0947	12339.8	13149	14461.4	10015.4	12399.8	10860.4	12407.8	9285.12	9774.86	11021.8	10531	8980.89	12059.7	7502.92	9985.75	10789.9	10291.3	8624.92	10734.6	9696.94	14078.2	10684.2	11474.9	10489.5	13862.4	10723.4	10478.3	8648.38	9389.39	11791.2	7692.18	9549.19	10056.1	8721.25	12049.4	9241.21	[32][M]+	-	2532	0	0	-	-	-	-	-
268	M312T285	312.363	4.74632	22499.5	21522.4	18435.9	16360	26213.7	16656	24552.6	18093.2	14489.8	24823.1	19664.3	18042.6	13728.3	15737.5	17753.4	16970.6	15503.3	15705.9	19810.3	17730.9	29176.4	17213.2	25308	21867.7	21878.3	20749.9	12854.9	11666.5	15836.2	16207.3	17131	18146.6	16681.1	16439.3	13989.1	17228.6	-	-	3098	0	0	-	-	-	-	-
269	M313T277	313.175	4.62152	3540.65	2421.45	2082.52	3776.55	1818.16	2876.95	1606.81	4256.57	3138.58	4642.22	2569.24	3090.34	3384.22	2070.22	2486.3	4873.89	5216.86	6199.48	2453.94	4586.54	2398.03	3556.7	6146.17	3181.59	1004.19	3083.19	5132.33	2721.45	2160.33	1540.26	3229.27	3731.79	3349.83	3141.6	5213.88	3009.78	-	-	3020	1	0	-	-	-	-	-
270	M313T65	313.237	1.07823	8252.22	8638.9	7958.54	6618.08	8009.28	23349	1519.19	1093.6	1446.04	1497.73	1163.43	1233.29	1613	1434.64	1565.34	2296.57	879.116	1410.98	2234.82	1428.44	1764.08	2483.91	2732	2389.75	2656.59	2923.53	1800.15	1785.26	1430.03	1619.64	2038.56	1747.67	1880.67	1999.36	1758.07	3931.58	-	[M+H-H20]+ 330.242	319	1	0	-	-	-	-	-
271	M313T562	313.274	9.36944	303974	213193	240702	333749	339852	548629	287155	433928	261545	229030	576581	271647	160234	192734	177073	156417	350912	220957	533523	532337	639438	632052	626733	503925	606408	505993	580900	935817	456198	309960	376159	396695	400884	275261	345272	489932	[33][M]+	-	41	0	0	-	-	-	-	-
272	M313T305	313.274	5.0779	154849	170599	140884	102702	135724	116473	104328	63714.8	69184.7	113831	67878.2	65318.1	86591.2	64334.6	69039.1	65100.6	63783.4	60057.7	99516.7	70711.6	106675	74745.8	101451	73445.6	96887.7	76747.1	81383	71715.2	74004.4	94951	71871.7	78655	76010.9	74508.8	97729.4	62339.2	[34][M]+	[M+H-H20]+ 330.278	132	0	0	-	-	-	-	-
273	M313T415	313.274	6.91216	57429.2	234107	250037	60667.5	113144	80420.2	21004.5	26457.9	17348.6	15668.7	10614	15823.2	15409.3	32471.5	34482	11029.9	6482.06	7147.17	32419.2	25056.2	23637.1	26565.5	23348.4	31096.6	81284.8	22499.7	15729.1	34721.6	29654.5	58301.3	38627.1	41715.4	35386.4	24800.3	19695	16891.4	-	-	1274	0	0	-	-	-	-	-
274	M313T538	313.274	8.9666	394095	455039	402369	148151	188888	232657	46305	35461.7	15021.1	19349.4	45961.9	15299.7	12064	14315	14402.4	11377.7	29948.8	14850.8	454871	404523	467262	588416	645668	470469	400403	428701	317845	806205	292976	379206	610477	534826	548811	268503	179300	280413	[35][M]+	-	1068	0	0	-	-	-	-	-
275	M313T444	313.274	7.39385	197043	247976	274024	97044.6	132613	166720	14793.3	32566.3	21203.5	18055.3	13079.4	16820.5	12128.9	10359.2	20097.6	10952.9	6820.49	7863.92	58540.2	70993.6	49776.9	69950.9	57197.9	66730.9	61373.6	69269.3	47954.5	45805.7	42184.7	29778.9	30697.4	31034.4	34114	28694.4	27454	25517.4	[36][M]+	-	1853	0	0	-	-	-	-	-
276	M313T469	313.274	7.81361	89211.5	90069.3	233494	63733.2	81798.1	146145	29059	39252.7	25218.7	23385.7	26758	25560	21388.1	18200.2	30398.1	17456.7	10390.7	15218.6	45913.9	41193.4	62134.9	29134.7	49151.8	33028.4	32826.5	39115.3	30972.7	34299	31708.8	23761	26144.9	27872.4	23371.6	27464.4	21442.6	31455	[37][M]+	-	2241	0	0	-	-	-	-	-
277	M313T365	313.329	6.09034	2248.3	3224.57	6227.8	2657.34	3215.98	7132.59	2699.81	2681.4	1860.05	2230.74	4785.47	1748.38	3301.9	2052.13	1836.02	4419.88	2215.12	1415.41	1873.93	3031.01	2582.76	2483.68	2904.09	2465.21	6163.25	3297.32	2538.7	2178.89	1308.17	2532.64	6792.53	1865.69	2463.51	2087.43	2712.04	1587.87	[32][M+1]+	-	2532	0	0	-	-	-	-	-
278	M313T284	313.366	4.73935	3382.16	5440.61	5190.73	3301.53	6646.51	4054.72	3672.41	4854.09	3872.76	6195.49	2227.97	4045.91	4352.42	4677.1	5154.68	4174.79	3041.58	3607.05	3901.11	4495.41	5624.8	4456.36	6096.5	5460.48	5019.51	2459.83	5303.11	4043.7	4428.68	4079.17	3130.75	4188.83	3897.96	2971.14	5792.63	1829.7	-	-	3092	0	0	-	-	-	-	-
279	M314T230	314.27	3.8288	1848.76	2129.8	2033.08	2904.64	3228.21	3096.29	1946.97	1511.22	1869.81	2104.12	1524.88	496.471	1789.96	1510.59	1563.73	1284.7	1261.42	1197.72	3666.76	3652.32	3946.8	5658.9	7704.7	4332.74	5193.12	3910.72	3908.95	4627.04	4514.08	3710.82	6131.89	6079.17	6740.01	3649.39	3980.89	3444.9	-	-	346	1	0	-	-	-	-	-
280	M314T305	314.277	5.07733	37550.1	39390.3	36583.6	25727.3	38316.5	25567.7	25277.6	18729.3	15860.9	22999.6	15907.5	14936.4	17371.9	16786.9	17508.4	18152.4	14966	14707.4	17936.6	16955.5	19551	20802.8	22547.3	19167.8	25026.9	20744.4	30146	18992.2	20670.4	16976.9	18674.5	17750.3	18247.4	19895.3	19426.3	16121.4	[34][M+1]+	-	132	0	0	-	-	-	-	-
281	M314T562	314.277	9.36841	70817.2	52007.4	60088.2	73839.4	82673.5	120663	66132.8	102049	56581.4	59172.9	118816	58220.4	36716.6	40771.8	40712.6	36403.2	75768.7	49747.4	131009	111052	128846	134223	140538	115852	126500	113685	134275	207530	92442.9	74541.9	83467.7	89476.3	81199.7	65777.1	73521.5	113448	[33][M+1]+	-	41	0	0	-	-	-	-	-
282	M314T538	314.278	8.96913	87379.2	94158.9	89557	36933.2	47983.5	48277.8	9130.33	9667.41	3503.01	5061.92	9384.43	4046.09	3395.42	3592.47	3764.07	3258.51	4676.19	4385.84	106285	102864	99671.7	134911	139262	102897	87394.6	103598	72329.5	193055	67241.7	97350.5	133069	118959	137079	58361.7	46961.7	62077.4	[35][M+1]+	-	1068	0	0	-	-	-	-	-
283	M314T469	314.277	7.81285	22124.5	20479.7	24979.2	15723.2	20745.9	23870	7023.26	8661.98	6121.02	5145.1	6945.53	5193.8	5039.86	4728.93	7123.65	4667.96	1867.41	4823.82	12234.3	14449.9	10760.3	6600.86	11495.3	7014.61	9688.41	11697	9997.53	9781.28	6837.73	4843.37	6294.82	4315.23	4988.79	5336.22	3713.35	5564.26	[37][M+1]+	-	2241	0	0	-	-	-	-	-
284	M314T387	314.284	6.44777	11931.2	11407.3	9491.63	5460.61	7299.75	6888.63	7441.28	5385.79	4205.77	6565.65	4558.19	4489.28	6297.05	5308.74	4360.92	5306.3	4983.71	4483.31	6037.44	4353.78	6034.44	8267.92	6511.35	5111.59	8388.43	3271.7	5128.78	5007.74	5518.59	4971.25	5687.49	4790.02	4816.82	4825.06	6456.33	4234.56	-	-	4845	0	0	-	-	-	-	-
285	M314T444	314.278	7.39385	52644	56774.4	64538.1	20940.6	33306.6	38282.8	4212.93	5132.45	3831.61	5219.41	3072.46	3606.23	3765.43	3488.12	5566.04	2807.46	1924.36	2443.38	15524.9	19052.7	10971.8	16534.1	17566.3	16275.3	12011.5	18844.6	12794.3	14180.6	10462.5	10311.8	9461.24	9726.79	17922.1	7144.05	7128.31	7348.03	[36][M+1]+	-	1850	0	0	-	-	-	-	-
286	M314T421	314.277	7.01286	26928.5	32002.4	21800.1	15586.9	19732.4	18427.2	8983.43	7785.55	5066.07	6791	8258.11	7075.98	7494.85	5827.67	3278.62	7547.39	4080.53	6744.92	6566.07	12786.3	11928.7	12381.9	12235.5	21021.5	14360.1	9961.62	8394.36	8500.68	13021.8	10748.2	13291.9	10573.3	5331.12	5785.11	10545	13259.7	-	-	885	0	0	-	-	-	-	-
287	M314T308	314.306	5.13598	4893.35	6431.65	7040.08	10187	7817.11	4121.23	10299.4	11819.4	6107.51	6178.01	7308.3	5706.05	8218.56	5379.69	11241.4	4470.38	4594.61	6195.37	2987.76	4316.76	15873.8	5037.21	3529.01	13192	3836.48	6725.76	10398.7	4605.01	4183.59	3845.64	7694.03	9615.88	9751.28	10137.7	4498.51	5715.38	-	-	2693	1	0	-	-	-	-	-
288	M314T291	314.342	4.84345	17928.3	24148.2	14410.9	16490.7	18737.7	17804	21759.8	15933.3	17077.3	22576.9	16933.9	15993.7	23937.9	18386.4	21827.8	17835.6	17069.8	17657.5	15730.4	15334	22900.2	18081.7	28170.4	19813.3	27910.9	24775.5	22280.8	14352.8	19311.8	22820.7	16153.6	13962.5	15885.8	16975.4	20170.8	16117.1	-	-	1552	1	0	-	-	-	-	-
289	M315T201	315.093	3.34288	907.438	1135.54	548.811	656.084	756.575	1001.37	1145.7	794.621	633.469	747.86	1024.39	761.469	811.469	891.439	704.991	742.043	1185.58	483.119	1332.21	842.236	758.159	840.876	955.858	799.663	852.929	773.744	898.387	918.319	921.174	516.465	974.17	921.599	859.247	939.542	1022.56	756.132	-	-	538	1	0	-	-	-	-	-
290	M315T180	315.193	2.99705	68486.3	68485.3	68393.8	18279.1	26103.8	22333.9	574.817	1226.84	2051.96	1793.56	1327.26	1665.22	1841.07	1176.16	2647.99	2145.23	1193.8	677.99	1957.56	1545.35	3032.74	1802.52	2024.88	2143.69	2948.82	2610.84	2560.82	1371.19	1492.76	2515.45	1572.65	1783.07	1553.12	1750.33	2669.91	2169.74	-	[M+Na]+ 292.206	324	1	0	-	-	-	-	-
291	M315T126	315.193	2.1051	9070.17	9795.77	9421.43	5037.75	5610.6	6784.97	5138.56	1479.83	1251.4	1532.01	1123.43	1206.25	1604.23	1490.98	2369.68	1560.36	943.69	1086.96	1394.22	1470.22	5482.05	1323.04	5330.58	1696.37	982.984	2124.37	1594.86	992.64	1252.33	763.914	1217.3	954.18	1323.07	929.327	1085.02	658.63	-	-	489	1	0	-	-	-	-	-
292	M315T290_1	315.253	4.83232	22521.6	22168.1	14885.5	24734.5	26979.4	21837.3	24227	20440	18156.2	21769.5	20221.2	21324.9	28679	22232.5	23261.3	20447.4	21122.7	19063.6	18375.4	20045.1	25382.9	26586.2	37403	27674	26827.1	28828.7	28574.2	18535.9	19882.4	20486.9	21608.6	19859.3	19415.1	18918.4	22720	20100.3	-	-	1553	1	0	-	-	-	-	-
293	M315T157	315.253	2.61246	3507.54	2212.71	3462.34	2467.57	3650.39	3367.18	769.867	713.85	589.521	647.439	583.648	567.461	649.575	737.787	916.008	572.41	356.476	411.986	3068.12	3368.7	3996.12	2640.71	1926.93	2441.56	2979.4	2286.74	1564.51	1756.35	1257.52	1660.15	2905.59	1944.59	2768.04	2344.76	1585.72	1647.06	-	-	4438	1	0	-	-	-	-	-
294	M315T538	315.28	8.96547	13816.7	16258.6	12968.2	6176.39	7392.69	10014.8	2666.52	3016.92	898.424	1629.87	2783.96	1523.14	1573.64	1800.28	1991.06	1169.36	1841.97	850.846	18112.9	15777.1	18242.4	19419.8	21006.3	16759.3	15226.3	15001.3	11110	27898.7	13102.7	14949.5	20191	20561.4	21039.1	9982.06	7725.85	11510.6	[35][M+2]+	-	1068	0	0	-	-	-	-	-
295	M315T562	315.28	9.37267	9368.6	13801.7	7046.81	12809.6	11599.7	20221	10080.4	13544.1	11702.2	8423.48	18594.3	13889.2	3962.53	7995.01	9103.36	7585.18	14586.1	6136.05	21367.7	18695.4	19198.8	21962.2	23771.3	18040.7	22807.6	16844.2	22044.9	34398.3	16691.4	9386.31	13934.5	15091.8	13781	7961.95	13066.4	17917	[33][M+2]+	-	1160	0	0	-	-	-	-	-
296	M315T305	315.28	5.0769	7775.11	6976.64	6207.52	5059.49	5337.98	4428.66	4270.08	4461.03	3170.35	2621.38	4011.75	2815.15	4139.49	2574.83	3548.63	3348.17	1800.71	2929.36	4021.28	5220.13	4322.23	5499.03	5070.67	2940.44	3101.4	3940.78	4782.97	4109.23	2533.03	2037.68	1461.36	3575.09	2238.8	4257.25	4402.74	1942.53	[34][M+2]+	-	132	0	0	-	-	-	-	-
297	M315T232	315.287	3.85843	713.306	1202.52	769.602	4162.71	2974.44	3295.89	2084.09	1649.54	2549.42	2222.22	1828.49	1739.16	2129.47	1341.81	2523.24	1590.36	974.33	761.508	1991.92	1330.74	2683.56	3128.25	2376.34	2604.42	2859.41	2708.48	2325.88	2433.08	2483.59	1954.69	2931.41	2750.55	2612	1777.86	1952.44	1511.11	-	-	2777	0	0	-	-	-	-	-
298	M315T290_2	315.345	4.83752	3289.13	5799.87	2091.36	2624	19403.8	4369.64	5543.7	2903.45	2802.15	6213.85	5156.76	4424.53	5091.43	4483.43	4115.64	4291.49	4332.12	3978.42	16770.3	3079.18	19602.8	5293.59	3386.12	3391.88	5863.17	6464.47	23572.8	4504.22	3740.77	6010.66	5228.45	17422.5	4172.04	2559.95	4745.11	2602.91	-	-	1535	0	0	-	-	-	-	-
299	M316T290	316.256	4.82837	5360.61	7256.66	5655.05	8004.52	6775.01	5762.45	3398.67	2981.68	3905.07	6454.43	4369.07	5603.21	4670.31	4960.89	3823.38	3762.37	4647.08	4645.31	5043.43	4832.74	4601.21	5671.76	5822.31	6834.29	5312.73	5755.78	7407.75	6053.15	3417.41	4642.16	5152.27	3286.01	4999.87	3314.95	7028.96	3668.2	-	-	1520	0	0	-	-	-	-	-
300	M316T232	316.285	3.86217	93284	101004	96248.7	481501	295373	359863	312466	265729	352223	325377	234553	244399	287201	262423	322605	241973	131824	160463	281586	261801	288758	371700	347712	349622	318861	392896	256792	225009	259177	291712	275570	265524	274699	144187	160648	140765	[38][M]+	[M+H]+ 315.278	154	1	0	-	-	-	-	-
301	M316T258	316.321	4.30472	12653.6	8908.23	7701.4	5757.64	7043.54	11202.2	8992.36	6012.32	8455.91	5429.45	5475.95	11229	10071.4	10912.8	12864.7	15747.9	7494.39	20225.9	13835.3	7604.87	7492.45	11580	12121	7281.97	2669.92	11540.5	8034.74	14796.7	7183.77	3904.02	8398.45	11256.1	6816.84	11110.4	12423	6491.66	-	-	4151	1	0	-	-	-	-	-
302	M317T43	317.115	0.716325	16476.5	16283.9	15503.4	25064	23518.9	21175.8	32691.3	33614.6	31790.7	29892.8	21302.5	23128.1	29697	31217.9	34193.7	26978.3	17290.9	19763.4	31262.7	34117.6	29478.4	36521.4	34869.7	26526.8	28290.8	32497.3	31294.8	21420	25858.8	20817.1	20585	21199.9	21009.4	25598.4	38044.8	31585.6	[39][M]+	-	3210	1	0	-	-	-	-	-
303	M317T1001	317.115	16.6828	20898.8	12219.1	14497.9	25668.7	15708.4	12584.3	14849.8	15538	18963.7	17314.7	15074.8	16468.7	14422.7	18773.5	16560.3	16075.4	16957.9	16946.8	15206.7	16653.3	16452.4	18330.5	13922	29278.8	16634.3	17254.9	15880.3	14046.2	18230.2	32578.6	18039.8	22157.6	16691.9	18078	16290.1	15056.3	-	-	494	1	0	-	-	-	-	-
304	M317T203	317.209	3.38839	78414.6	90377.8	89930.4	98254.8	40468.6	41940.2	14611.2	14962.5	25668.4	17525.9	16117.7	14125.7	16807.3	16021.9	17743.7	24664	10575.7	14151.1	33618.4	28871.9	32250.1	38426.4	36753.3	34309.4	48761.6	35333.1	32639.7	52508.6	34474	41998.5	43995.4	47074.4	46217	41202.9	50094.8	36615	[40][M]+	[M+Na]+ 294.221	279	1	0	-	-	-	-	-
305	M317T180	317.209	2.99551	32079.5	34637.5	34123.2	14542.4	14889.7	13764.3	4116.15	4997.82	11440.8	5293.68	5577.64	4893.76	7961.92	7757.78	9505.35	9034.37	3695.26	4050.32	3460.11	3951.13	4456.11	4686.49	4282.92	4010.96	6861.71	5450.96	5777.51	5273.52	5572.48	4749.59	6158.52	5442.01	5732.92	4101.96	7245.87	4392.81	[41][M]+	-	4239	1	0	-	-	-	-	-
306	M317T278	317.209	4.63576	2230.78	1044.15	7272.97	5541.13	5740.2	5662.61	1955.59	2845.24	2846.88	4264.18	1667.13	1811.89	1464.88	3520.19	2448.64	4791.18	2183.46	1312.49	5255.59	4291.67	4243.76	3244.42	3758.83	3662.54	3782.26	3627.01	3339.87	4924.18	2980.42	2056.19	4428.85	4491.81	5055.28	3557.74	6362.14	3339.61	-	-	3385	1	0	-	-	-	-	-
307	M317T194	317.269	3.23247	796.338	1184.14	746.303	2148.56	2107.12	2060.7	2275.16	2464.35	2866.68	2666.22	2229.19	1933.1	2249.42	2324.57	2681.17	3075.11	914.94	1962.03	2954.42	3202.65	2952.36	2345.14	2197.98	2016.99	3449.09	2175.33	1354.17	1987.22	1421.34	1224.2	1650.53	1643.12	1476.58	2096.35	2412.21	1849.3	-	-	4774	1	0	-	-	-	-	-
308	M317T231	317.289	3.85653	21479.2	21362.9	19941.1	105409	63052.4	79984.8	64572.5	50805.4	68401.5	63918	50304.7	50438.3	55053.6	56548.9	65504.8	47112	28298.9	33617.7	57998.1	54473.5	57103.8	74275.7	76351.7	72141.2	68330.2	74134.6	54834.7	43909.1	52101.3	57656.9	56637.8	54590.6	55464	31591.8	31532.1	29445.6	[38][M+1]+	-	154	0	0	-	-	-	-	-
309	M317T324	317.305	5.39494	1418.51	1757.71	1173.09	1227.81	1385.61	1087.24	1809.59	1231.18	1365.44	1908.83	1258.11	1484.82	2088.84	1375.49	1439.65	1361.64	1328.75	1573.79	1136.85	1037.56	1593.44	1555.16	1834.75	1438.99	1250.7	1666.46	1337.33	1310.22	1403.93	851.506	1830.05	1319.87	1720.61	1266.72	1367.89	1263.12	-	-	3916	1	0	-	-	-	-	-
310	M318T43	318.119	0.719567	4108.25	5387.43	4361.77	5558.3	4577.66	5018.24	7432.21	8368.85	6365.04	5210.27	4045.79	4335.2	6167.36	6993	7487.8	6355.61	3269.44	4217.36	4782.64	9270.29	6331.42	7615.66	9525.79	6898.94	5565.1	6620.78	6159.15	4330.1	4960.59	5006.68	4032.86	3956.44	4688.11	6133.99	10934.7	5776.06	[39][M+1]+	-	3210	1	0	-	-	-	-	-
311	M318T1003	318.118	16.711	3498.75	2624.84	2807.39	2754.08	2176.49	3053.01	3219.61	2888.71	2390.85	3059.29	2679.8	3301.42	3982.6	3339.44	3331.92	3320.93	2516.94	2862.84	3065.51	3233.06	4641.4	2747.64	2937.19	2955.58	3220.28	2760.69	2371.72	3106.69	3271.1	2312.83	2928.11	3092.4	3244.2	5772.48	1167.73	3424	-	-	4901	1	0	-	-	-	-	-
312	M318T204	318.213	3.39403	17959.7	19824.2	18713.9	9619.9	10371.6	26992.5	3962.74	5855.07	5724.99	3468.62	3290.15	3132.5	4303.1	3759.6	4921.41	5682.19	2922.85	4023.44	7399.76	7690.27	8692.62	9857.23	6878.43	8665.07	12656.6	10712.3	8206.21	13225.1	8878.11	11005.1	12768.7	11758.2	10049.9	10333.2	12550.9	9769.01	[40][M+1]+	-	279	0	0	-	-	-	-	-
313	M318T179	318.212	2.98643	6992.32	7504.1	7591.39	3280.61	3771.11	3060.76	917.258	1317.22	2577.91	1638.96	1416.03	1120.44	2089.56	1975.59	1983.99	1832.53	964.571	1255.32	946.558	1059.19	1428.51	1177.74	1446.59	1097.08	2386.54	1716.19	1200.09	1200.24	1517.19	1413.56	1720.32	1291.61	1401.09	1366.22	1785.81	1202.74	[41][M+1]+	-	4239	0	0	-	-	-	-	-
314	M318T207	318.24	3.44319	41420.3	42725.1	40363.1	20743	3179.25	5934.27	1389.7	1768.89	6120.49	2460.92	1982.17	2062.46	4551.61	2728	1981.4	3425.05	2682.47	2152.67	8449.11	1330.79	9107.92	2681.13	8887.61	1990.31	3548.58	3679.11	2692.18	12948	4367.71	2099.35	12545.4	1126.99	3370.12	10374.6	2719.94	1808.35	-	-	2930	1	0	-	-	-	-	-
315	M318T232	318.291	3.85862	3303.64	4034.68	4031.16	14556.4	10099.8	11329.2	8727.89	7603.59	10127.7	9465.03	7112.5	7908.56	7758.14	7761.32	9437.06	5978.03	4912.98	5103.09	8276.67	7551.19	7624.64	9534.41	10239.3	11087.2	8942.19	12237.5	8136.28	7479.71	7697.11	9207.4	9254.9	7701.8	8106.38	4273.49	5161.41	5040.34	[38][M+2]+	-	154	1	0	-	-	-	-	-
316	M318T246	318.301	4.1069	49944.3	52346.9	52311.1	296967	163588	234922	115787	112640	145016	117857	82461.5	96828.5	110449	110019	135996	95121.4	47110.7	51515.3	122327	107694	122802	201196	184564	160337	160560	191123	118557	99153	103206	105697	97490.2	92826.7	84323.6	65933.6	53769.2	51238	[42][M]+	[M+H]+ 317.294	165	1	0	-	-	-	-	-
317	M319T43	319.115	0.72105	6841.73	1545.25	2390.71	2982.58	3727.31	2396.02	3712.21	3342.87	4819.29	2612.16	2233.34	2384.84	3065.22	4135.87	4178.29	3023.38	1634.33	1822.14	3993.28	2576.81	3221.57	5546.18	6121.08	3914.74	3610.91	3435	4200.18	3941.03	2903.28	2787.46	1654.52	2320.39	2107.68	2662.1	4634.08	3047.81	[39][M+2]+	-	3210	1	0	-	-	-	-	-
318	M319T297	319.194	4.94793	11316.4	11589.2	9120.49	9339.91	6302.14	9819.06	2632.3	3178.42	1346.79	633.218	2556.99	1632.12	1580.28	1645.16	2809.04	2056.94	1417.36	1217.51	7177.97	8154.77	8941.95	12298.8	9466.99	10905.1	5208.37	9077.58	8291.98	7808.3	7921.57	8021.83	8220.97	5749.91	7955.04	6806.45	7219.51	6926.38	-	-	3246	0	0	-	-	-	-	-
319	M319T206	319.225	3.43929	36457	40463.1	38772.6	68423.3	47829.4	43869.5	41997.9	69015.4	86349.8	34404.9	34457.1	31255	59342.3	46680.8	38071.6	64916.8	27364.5	29765.9	138810	139313	156081	103256	97680.6	88206.6	175123	147680	93108.7	180098	163102	114852	199880	227188	231705	131925	151039	98816.6	[43][M]+	-	162	1	0	-	-	-	-	-
320	M319T228	319.224	3.80438	10964.9	14019.2	13674.8	12368.5	13498.4	17003.3	8731.31	6851.94	6028.11	8616.14	9587.01	4058.08	7836.21	5099.12	6189.38	5365.29	3778.63	3860.45	19433.4	19791.5	20174.9	26305.4	27975.7	20767.7	37677.2	22706.7	22654.8	32722.6	25621.9	22393.8	47367.1	46398.3	41688.5	23187.3	23613.6	23303.7	[44][M]+	-	4266	1	0	-	-	-	-	-
321	M319T66	319.27	1.10818	741.142	847.207	875.646	1415.16	1516.39	1353.79	1239.39	1237.99	1652.63	1406.75	1403.71	1243.28	1417.25	1619.73	1462.28	1264.04	2145.58	1751.29	2049.02	1665.53	1316.79	1818.55	1311.31	1311.7	1319.96	1287.66	1430	1386.88	1652.12	1113.39	1731.71	1294.34	1063	1633.48	1672.09	1383.98	-	-	4430	0	0	-	-	-	-	-
322	M319T272	319.284	4.5409	25387.4	33671.4	16258.8	12374.3	39171	9913.23	37858.7	11374.8	8487.73	10082.4	12269.5	20670.9	41719.7	22036.1	27306.9	16620.4	19966.6	14728.2	13717.9	19475.7	27299.3	13940.1	28325.9	13886.3	25201.4	31881.9	19090.6	16923.8	18780.8	40533	26248.6	28343.8	27099.8	13314	14985.4	25182.6	-	-	857	1	0	-	-	-	-	-
323	M319T350	319.299	5.83667	1258.7	1544.83	1614.64	1009.48	2596.3	3217.92	2151.9	1352.14	1659.64	2091.53	1221.27	2209.41	2054.67	1171.6	1916.08	1500.77	1672.94	1276.58	2486.76	2363.65	1476.97	3460.86	3264.46	2855.9	3439.07	1993.35	2313.52	4110.16	2536.11	4818.6	1767.96	2169.9	2012.36	875.895	2433.28	1722.26	-	-	336	1	0	-	-	-	-	-
324	M319T247	319.304	4.10906	11629	11629	11518.7	61094.9	33958.9	52626	24220.4	22468.2	33213.9	24553	17998.3	20586.9	22514.7	22424.7	25364.7	20748.4	9707.2	11757.8	26582.3	27699.9	25023.9	41233.2	39190.1	32902.8	35634.2	39999.6	26444.1	19455.5	20688.4	24449.3	22609.6	21434.4	17908.3	14281.1	10953.3	9112.28	[42][M+1]+	-	165	0	0	-	-	-	-	-
325	M320T206	320.228	3.43929	8906.7	9062.15	11448.7	14079.5	10294.6	10146.7	9699.2	15571.7	19247.4	8243.04	7858.02	6246.78	11699.9	11482.7	7922.31	15123.1	6298.27	7052.67	32093.7	28309.4	35386.5	25086.2	22723.8	18923.6	40909	33002.1	21087	38256.1	36266	27881	43309.8	45747.5	52085.1	33942	34692.7	23018.4	[43][M+1]+	-	162	0	0	-	-	-	-	-
326	M320T229	320.228	3.81109	3248.19	2916.44	3304.08	4282.64	4392.93	4838.18	1729.02	1575.44	1665.32	1766.11	1705.83	1301.45	1485.63	1636.4	2049.98	1542.58	1313.16	1373.04	4957.32	3328.29	5066.57	6322.99	6696.54	5434.31	8591.24	5226	5700.97	6225.92	6245.44	5583.86	10182.4	10331.9	9302.39	6290.46	5428.63	4950.18	[44][M+1]+	-	4266	0	0	-	-	-	-	-
327	M320T238	320.256	3.97139	49778.4	48503.6	50223.6	105146	137411	143600	39774.4	54476	54434.1	46282.1	31709.8	25605.5	20296.5	31849.3	26791.5	33030.5	20245.6	36453.8	51979.8	58784.4	54308.4	63408.4	60053.8	79012.7	46585.4	64611.4	44602.7	56183.5	40697.1	44879.5	51312.8	52174.9	50755.5	28777.6	17622.2	25389	[45][M]+	[M+Na]+ 297.267	285	1	0	-	-	-	-	-
328	M320T246	320.307	4.10553	2116.72	1603.48	2143.87	8956.08	4877.78	6736.22	3328.88	2813.29	4056.76	3249.19	2321.8	3125.08	3302.8	3295.88	3803.5	2886.55	1235.13	1557.47	4544.97	3812.68	4397.65	6124.1	6059.87	5250.72	6234.86	7432.94	2187.75	2600.53	3492.28	6219.1	2967.89	2889.25	5486.79	2620.48	3089.26	1377.39	[42][M+2]+	-	165	0	0	-	-	-	-	-
329	M321T318	321.21	5.30806	4168.8	3132.18	2841.09	8800.74	5520.35	6695.17	8969.64	7597	10228.3	7588.56	7689.1	7190.19	7444.54	7216.92	6823.59	7379.28	5187.72	6888.33	7318.09	7146.77	6610.56	9153.21	7506.92	8100.16	5527.5	7237.06	8460.79	5546.15	5602.43	5506.58	4853.12	6587.15	4174.49	3730.83	5546.26	5136.48	[46][M]+	-	3521	0	0	-	-	-	-	-
330	M321T250	321.24	4.16817	4291.04	3847.26	3998.67	10488.6	9903.75	13036	8123.02	14821.3	21680.2	9107.18	14255	10304.3	16827.3	11977.3	13046.9	22940.7	10630.6	5928.49	14406.4	13142.3	16988.8	21009.2	20123.7	11614.5	23153.8	16853.9	15167.6	19876.4	23047.6	17003.5	23925.6	21640.1	21089.3	22872.2	29095.1	20822.6	[47][M]+	[M+Na]+ 298.251	4062	1	0	-	-	-	-	-
331	M321T207	321.235	3.4559	721.018	2695.32	2190.32	3242.16	4303.44	4929.42	1873.76	3022.96	3906.33	2566.64	2897.46	2528.43	2893.98	2887.78	2900.81	3793.14	2578.91	2828.96	3996.79	4757.07	5109.22	7627.18	2251.34	6687.23	6771.91	5360.21	5013.09	5972.89	4175.5	5001.52	5836.13	10356.7	7107.09	4025.95	6368.99	4830.45	[43][M+2]+	-	162	0	0	-	-	-	-	-
332	M321T238	321.26	3.971	6244.27	9484.32	6911.05	26401	26741.7	31464.7	8638.06	11864.6	10477.4	10074.9	7132.13	5648.16	4541.06	6472.41	6942.55	6701.6	3777.31	7440.19	12398.9	12408.6	13077.8	14863.3	13614.9	17009.5	10319.7	14107.1	9746.17	12621.7	8932.7	9420.83	11589.8	11975.5	11077.6	6824.85	3302.39	5686.72	[45][M+1]+	-	285	1	0	-	-	-	-	-
333	M321T370	321.315	6.17104	22568.5	27530.2	19296	20183.1	23783.9	24092.5	20557.4	18580.7	19587.5	24346.5	20829.7	16298.3	26922.8	17265.1	16235.2	21800.1	18964.8	20175.2	18757.6	18097.2	22186.5	19750.5	27332.4	21178.5	26284.3	21034.9	18043.4	18068.1	17524	23976.4	18192	12932.5	20197.5	18966.7	21177.9	16410.6	-	-	2058	1	0	-	-	-	-	-
334	M321T386	321.315	6.43552	6873.49	7785.06	7785.7	35964.9	32107.8	40154.9	22987.2	19941.4	20460.3	17924.7	32754.4	18476.2	16813.2	11849.8	14516	13377.1	16342.7	12140.7	39852.2	43652.7	45690.8	68153	75698.2	68278.4	43901.8	47519.6	60889	49557.8	36730.4	32497.9	34784.9	36257.5	34314	17529.9	23826.1	25119	[48][M]+	-	2896	1	0	-	-	-	-	-
335	M322T318	322.212	5.30763	888.634	1065.18	980.213	2340.07	1035.08	987.597	2087.74	2216.97	2513.37	1903.45	1240.01	2199.23	1912.18	1512.7	1886.01	2061.55	1265.22	1310.75	1555.22	2809.12	2253.65	1584.85	1888.66	2398.12	1770.44	3120.8	2065.36	1520.32	2270.02	1394.82	1547.19	1964.56	1645.63	1551.49	1329.6	1362.74	[46][M+1]+	-	3542	0	0	-	-	-	-	-
336	M322T250	322.243	4.16688	1335.85	1715.68	1437.05	2911.58	2278.33	2098.98	2882.11	3117.95	5267.02	2633.71	2317.21	2417.46	3636.16	2355.05	3064.14	5724.91	2496.06	1534.88	2880.72	4463.29	2223.74	4452.81	3605.69	3955.44	5233.48	3889.45	3992.66	3977.34	5541.96	3621.06	4858.14	3835.99	5767.35	5213.04	5901.74	4150.97	[47][M+1]+	-	4062	1	0	-	-	-	-	-
337	M322T293	322.272	4.88591	32685.5	31630.9	31328.7	47313	21620.3	31181.9	43752.8	19685.3	27496.2	47076.6	32601.4	25031.9	32040.9	20283	24273.4	22830.6	27747.8	21957.3	15773.7	14634.2	15248.5	23590.5	23147.1	25966.2	21719.6	28924.3	48621.8	16700.7	14041.9	14289.9	38362.7	44685.4	38619.7	51548.1	9514.19	13974.2	[49][M]+	[M+Na]+ 299.283	266	1	0	-	-	-	-	-
338	M322T198	322.274	3.29258	4706.53	3991.39	3992.75	4198.47	2988.98	2700.61	2495.01	4886.74	6377.38	2224.21	2364.13	2512.61	2506.52	2599.52	2451.28	2245.74	1592.41	2076.01	19564.7	21143.5	21756.9	14746.5	12823.8	14438.4	25495.7	17207.8	16858.4	24907.3	12712.3	11286.6	24901.9	25252.9	28411.6	13106.2	11405.5	10497.2	[50][M]+	[M+H-H20]+ 339.278	385	1	0	-	-	-	-	-
339	M322T254	322.272	4.23708	72786.6	70783	70033.3	15088.9	10499.7	16007.5	8698.83	8830.35	10274.6	5651.09	3979.45	4895.32	4131	4062.71	5107.88	4495.29	3243.15	3909.67	5506.09	2468.04	3788.23	9122.61	8213.76	8905.55	6564.81	7289.54	5656.12	4839.05	8495.79	3683.94	4861.42	2456.87	4295.59	4157.42	4045.46	3757.86	-	-	299	1	0	-	-	-	-	-
340	M322T386	322.319	6.43552	1679.67	888.149	1324.31	10818.3	8423.62	12330.8	5935.37	4992.77	5595.53	5325.94	9434.5	3491.66	4624.88	3066.5	3567.79	2977.61	3631.58	3414.19	10009.1	9913.62	10882.6	16817.3	17915.1	16591	11286.3	11091.4	15781.4	12469.7	9647.22	6898.39	9150.79	8632.01	8519.19	4714.69	6378.77	7065.75	[48][M+1]+	-	2891	0	0	-	-	-	-	-
341	M322T370	322.319	6.1729	7783.49	10879.2	7091.15	4982.21	6937.01	6203.01	5535.1	4944.34	6456.48	6147.84	6333.59	4818.59	8049.76	4451.9	4966.72	6081.43	5354.08	6266.69	4551.82	4042.32	7596.85	5614.25	6995.76	4880.8	7350.1	5812.75	4947.77	5696.53	5202.25	6159.74	4425.76	5117.44	4464.82	5755.54	6943.66	3930.73	-	[M+H-CH4]+ 337.338	2054	0	0	-	-	-	-	-
342	M323T50	323.146	0.835542	1379.94	1908.65	1452.48	790.54	747.201	841.425	1135.66	1554.88	836.404	1398.6	687.277	645.656	531.661	938.873	929.799	733.825	484.855	569.288	6426.01	6605.66	6793.06	2063.95	2122.65	3436.99	2042.37	4413.08	4808.13	3982.93	3563.8	3925.55	2820.76	3389.3	2985.16	4348.19	4666.16	4200.04	-	-	4343	1	0	-	-	-	-	-
343	M323T346	323.226	5.76063	1300.9	1544.83	2341.32	1634.65	1699.6	1328.86	1205.79	1073.34	2112.66	1113.88	2220.01	1588.97	2166.08	881.814	1874.47	954.431	1191.81	1701.04	2395.82	2053.93	2105.64	2131.96	2700.92	2840.37	1798.21	1696.68	1876.62	1500.16	2176.02	1268.05	1929.34	1507.24	2404.21	2037.02	973.363	1917.1	-	-	4606	0	0	-	-	-	-	-
344	M323T293	323.275	4.88598	9112.88	8937.54	7881.89	9886.74	4703.71	7480.84	10125.7	5460.07	5572.11	9781.98	7654.38	5275.66	9033	4273.18	4884.94	5374.94	6375.35	4033.44	3470.68	3174.82	5393.18	5485.11	6251.09	5478.74	4947.07	9480.32	11316.2	3484.26	2811.46	6992.08	9890.69	8713.22	7869.01	12569.7	3662.95	3322.4	[49][M+1]+	-	266	0	0	-	-	-	-	-
345	M323T197	323.278	3.29136	1300.78	788.632	816.651	1364.68	1023.99	805.866	869.201	1121.6	1280.37	903.192	848.795	892.367	902.63	616.569	842.799	978.447	710.438	872.155	4405.24	4595.7	4916.63	3971.02	3253.74	3642.79	5976.57	3971.69	4378.09	6784.89	2917.23	2869.19	6942.9	5864.75	6669.47	3103.72	3097.44	2351.45	[50][M+1]+	-	385	0	0	-	-	-	-	-
346	M324T281	324.29	4.67608	383538	344577	372601	222320	190259	286165	33656.9	21254.2	35255.1	26180.2	23533.1	16635.9	11471.8	19141.7	17810.3	12567.1	5745.91	13092.9	132159	135710	152660	289885	331930	504665	178177	145621	238543	162641	61794.1	123147	114451	105418	112061	62586.6	37263.9	71950.1	[51][M]+	[M+H]+ 323.283	142	1	0	-	-	-	-	-
347	M324T353	324.325	5.88115	1839.52	2038.72	2261.25	2009.48	2177.66	1697.96	1547.77	1282.03	1532.7	2909.76	1655.71	1866.39	2239.66	1920.3	1801.98	1877.96	1575.55	2653.37	1663.07	2461.42	2920.41	2926.89	2047.18	3113.38	2547.56	2274.49	1806.84	1642.88	1919.71	1676.77	2072.22	1528.39	1635.61	1923.12	1822.12	1404.23	-	-	3606	0	0	-	-	-	-	-
348	M325T40	325.113	0.672117	4565.56	4662.16	4667.14	1524.75	8448.43	2779.63	91518.8	139460	108588	5529.67	5345.87	3088.63	14213.9	58066.2	24140.3	37335.9	1308.67	1811.17	4828.89	4445.87	4772.48	154541	170367	35778	13477.2	31201.3	52486.4	5369.53	3834.37	4490.88	3721.12	3687.64	3813.73	20334.8	65102.1	19704.7	[52][M]+	[M+H-H20]+ 342.117	127	1	0	-	-	-	-	-
349	M325T67	325.141	1.10992	474.287	327.034	331.283	606.082	649.766	463.644	911.939	1649.86	688.957	673.182	384.711	327.255	409.327	430.325	602.513	393.263	384.068	361.375	2937.04	2770.15	3211.65	4774.88	4344.98	3303.9	4339.6	4567.6	1412.23	2142.77	1643.9	1528.56	725.7	997.613	1003.32	1517.92	969.491	1779.05	-	-	4431	1	0	-	-	-	-	-
350	M325T49	325.162	0.8177	3386.55	4527	1354.7	764.424	1242.53	1653.64	1610.84	1270.24	1529.52	1333.87	1110.13	778.628	1202.9	835.195	472.787	1430.39	967.494	992.852	1340.88	1266.87	1311.16	2558.14	2429.97	1616.71	2370.28	2285.44	1498.52	1618.11	1618.65	1637.87	1588.69	1532.68	1929.6	2091.63	1569.7	1477.08	-	-	456	1	0	-	-	-	-	-
351	M325T297	325.212	4.94778	142847	147330	142403	137896	116050	151166	21040.2	12915.2	11116.9	14023	12677	10645.6	4899.51	6835.93	7791.68	6115.55	4270.75	7802.08	96313.8	117479	123963	186070	169412	200139	99259.2	121625	128124	99248.1	98547.4	112998	98981.6	102621	106248	61960.3	58872.9	78295	[53][M]+	[M+Na]+ 302.222	201	1	0	-	-	-	-	-
352	M325T275	325.235	4.58757	10100.2	8378.23	9082.56	11753.4	6886.43	7571.36	7110.98	7309.54	8040.35	11158.6	22621.3	10041	9077.54	10196.7	10639.3	28819.2	8786.16	26986.6	7948.11	9984.69	7716.86	7171.42	40422	10577.4	7232.58	14352.3	13989.4	9122.31	10664.5	33812.8	10500.6	9981.81	21807.1	8896.14	9355.24	15280.3	-	-	4260	1	0	-	-	-	-	-
353	M325T301	325.274	5.01532	5190.59	8542.33	5936.07	4442.61	3602.19	6379.79	6896.83	3326.71	4474.54	2545.65	4864.36	5366.87	3111.06	4674.2	6314.43	4173.35	4337.72	4339.25	5300.74	8513.07	8823.89	10815.8	11788.2	9142.86	7849.28	10832.6	5768.14	4713.28	4945.43	5805.36	5744.95	6076.16	4661.71	4301.84	5309.65	1903.52	-	-	1976	0	0	-	-	-	-	-
354	M325T551	325.273	9.17667	2652.34	6418.7	4893.42	1977.36	7660.57	6399.17	3132.51	4821.25	2562.92	4026.92	7962.22	3015.33	3756.91	2364.52	2958.07	3335.16	6043.39	3499.53	5673.89	9161.12	3360.29	12378.1	4433.35	5117.57	6697.1	5298.98	6535.23	8415.64	6396.3	3100.16	4820.53	4875.62	4884.07	7390.77	7354.02	6586.39	-	-	349	0	0	-	-	-	-	-
355	M325T281	325.294	4.67604	87956.3	84258.3	84082.3	51582.7	44065.4	67180.2	7644.66	7700.31	10201.9	6767.72	7058.11	5599.42	2759.05	5373.54	4430.71	2930.49	1201.73	3552.7	33615	33799.3	34007.2	72337.4	84228.9	120403	43858	31774.2	57378.1	37393.7	15977.9	25737.6	26149.4	26401.3	26971.7	14591.9	10241.9	19634.2	[51][M+1]+	-	142	0	0	-	-	-	-	-
356	M325T347	325.31	5.77993	4206.08	6135.36	5702.98	2844.53	5677.17	4888.34	2785.55	2116.27	2085.11	3437.21	3823.91	1820.4	3202.07	1406.32	1061.37	2468.54	1374.61	1985.27	3803.7	3031.67	3210.84	1911.85	6280.54	2397.61	2787.66	2353.06	2686.75	4727.79	3390.15	3285.01	2476.79	3334.48	3055.76	3127.71	4276.99	2074.5	-	-	3889	0	0	-	-	-	-	-
357	M325T367	325.31	6.11422	1916.05	3959.43	2849.45	2991.26	3445.83	3695.57	1615.52	1694.85	1339.27	1366.4	1891.09	1933.79	1759.8	1010.79	1564.11	2076.76	1321.47	761.854	2457.05	2462.9	3354.85	2648.35	2842.04	3534.91	3945.52	2900.47	2465.81	2741.71	1772.28	2009.55	2133.78	2786.47	1608.09	1651.86	1555.58	1759.12	-	-	3458	0	0	-	-	-	-	-
358	M326T41	326.117	0.676417	993.938	1963.18	2157.85	774.801	1597.98	431.158	15732.9	22575.2	16175.9	1107.31	834.081	512.857	2287.76	9601.63	3579.36	5622.52	259.978	499.059	919.042	987.771	874.133	26101	27019.2	6264.87	2311.58	5057.98	8383.41	821.079	476.405	732.929	653.216	578.535	618.989	3109.34	10548.8	3452.56	[52][M+1]+	-	127	1	0	-	-	-	-	-
359	M326T297	326.215	4.95015	37750.3	34089.6	32657.1	33463.8	28318.9	31991	4490.09	5192.32	4076.87	5454.65	2975.38	4449.93	3105.34	3806.19	3585.27	3526.28	2776.54	2978.4	22628.8	30119	24196.1	41875.4	34190.2	46681.5	27555.2	30312.3	31659	20879.9	25695.7	25963.4	25652.8	25766.4	24067.5	14324.1	14055	16777.2	[53][M+1]+	-	201	1	0	-	-	-	-	-
360	M326T44	326.209	0.73175	2801.62	1997.5	2140.66	2444.86	875.301	1570.16	2394.88	1894.39	1470.43	1831.66	1093.79	773.869	1897.73	2110.87	2029.07	1474.67	567.599	909.754	1285.55	1403.03	2177.44	1794.05	1719.66	2223.69	2179.4	2025.75	2319.07	986.394	1265.69	938.154	674.612	1115.41	1251.78	1709.79	1681.22	1265.91	-	-	3823	1	0	-	-	-	-	-
361	M326T280	326.297	4.67497	12952.6	8937.23	11372.8	5593.04	5045.76	7271.39	1761.04	1477.9	1956.12	1699.18	1832.04	1408.99	1789.74	727.578	1291.17	1184.01	998.864	1154.04	4287.14	4649.51	5054.34	10031.6	15912.3	16476	6898.06	5486.19	7915.14	7089.92	3531.8	5010.09	3500.64	3969.06	3591.48	2319.16	1766.21	2873.98	[51][M+2]+	-	142	0	0	-	-	-	-	-
362	M326T301	326.306	5.01007	136959	134643	135739	443166	162909	247342	288955	341498	244077	316852	248483	261986	108217	135301	172939	127687	146035	205813	370269	404150	415890	702205	717110	861650	526828	437339	560556	374755	224001	247335	164272	162126	164902	141835	143259	195682	[54][M]+	[M+H]+ 325.299	92	1	0	-	-	-	-	-
363	M326T415	326.306	6.91191	887.424	444.132	888.531	4455.61	2478.65	2920.81	4095.8	5649.4	4589.22	4137.48	3167.69	3450.47	2217.34	1767.63	4074	4503.14	1470.25	1960.13	6235.45	8558.62	3435.74	8282.85	5100.35	5132.26	4970.18	5360.3	4080.01	3909	2756.7	2976.82	961.87	1031.6	1365.48	1483.73	2913.91	3529.25	-	-	1298	1	0	-	-	-	-	-
364	M327T298	327.218	4.96057	6581.71	5796.54	5343.36	4382.87	4417.94	4446.81	1638.53	1003.91	2019.87	1160.97	1679.38	1557.79	1370.88	2010.36	1671.29	1500	1051.39	1427.79	2886.97	4180.3	5301.31	7609.54	6477.13	10672.1	3908.71	4113.75	4139.38	3984.57	3956.13	5175.1	3772.21	3683.26	4924.62	3195.23	3618.49	2662.63	[53][M+2]+	-	201	1	0	-	-	-	-	-
365	M327T319	327.227	5.30885	23337.3	26004.6	31495.4	105867	52077.1	88749.9	130576	117650	139727	117844	110820	104488	106607	91310.9	101105	101914	98110.1	106022	91230.3	112912	96790.9	102890	118400	123691	93628	102300	135043	64614	74212.4	73112.4	50447.3	54770.4	51688.9	53344.1	75390.1	68898	[55][M]+	[M+Na]+ 304.238	233	1	0	-	-	-	-	-
366	M327T394	327.253	6.56376	6529.5	9113.83	7561.32	4657.3	4456.01	5557.08	2909.55	3104.93	3548.77	3145	2668.22	3070.98	3503.08	3870.34	4298.89	3379.32	3470.2	3533.77	3575.01	6275.25	3836.36	4659.12	3241.83	4515.83	6044.47	5004.12	3634.57	3443.8	2920.47	4128.48	3931.96	4274.4	4460.41	3948.48	3181.02	3918.74	-	-	4089	0	0	-	-	-	-	-
367	M327T376	327.253	6.2677	1634.5	5649.54	5414.15	2810.38	5504.19	4987.64	2684.24	2687.84	2825.83	4084.39	3120.28	3042.05	3226.46	2622.37	3924.3	1849.51	3138.27	3429.54	2620.16	2675.74	3203.83	2511.01	4702.92	2611.12	3856.91	2469.99	2370.89	3434.92	3560.25	1898.09	1908.51	2495.2	2423.71	1790.35	4331.01	3093.94	-	-	1894	0	0	-	-	-	-	-
368	M327T205	327.253	3.41275	1848.77	2041.25	1857.54	2521.13	2147.74	3232.16	1668.23	4620.46	2163	2540.84	1749.36	1098.91	2260.47	2887.67	1918.9	1153.17	1637.45	2034.25	3242.74	3778.09	3859.37	2358.57	3026.32	2626.19	3926.82	3280.94	2521.53	4137.93	2573.2	3225.61	3115.17	3176.06	2967.35	3493.53	3828.57	3185.57	-	-	4754	0	0	-	-	-	-	-
369	M327T578	327.29	9.63979	7892.56	9761.94	4045.4	4910.01	6911.85	6621.84	5679.29	5616.09	4468.74	4069	6825.93	5448.78	4582.89	2462.31	5340.28	4356.98	3565.37	4493.93	7588.62	8265.04	6820.63	7907.89	7799.22	7127.86	8488.87	7553.9	8529.35	11692.5	5146.41	5699.24	4354.55	4161.19	4944.18	5291.98	5768.61	5082.24	-	-	2185	1	0	-	-	-	-	-
370	M327T300	327.309	5.00806	30188.7	31805.3	28880.8	103500	35867.2	53795.3	67796.7	75129.3	55785.7	71994.3	56793.1	57597.1	26666	34125.5	40610.7	31697	33925	47092.4	83373.1	88026.3	93818.5	151445	169908	192250	123204	97326.8	128615	84106.8	56640.9	57579.2	37030.8	35975.5	37841.2	34179.9	31086.9	45482.5	[54][M+1]+	-	92	0	0	-	-	-	-	-
371	M328T319	328.231	5.30866	5640.94	5826.71	6856.92	21979.1	11674.2	19227.9	30594.4	27001.6	29634.5	23849.4	23899.5	21916.1	25006.9	19059.4	19950.2	21448.5	21525	21775	18951.2	24464.2	21619	22210	24973.5	27006.1	19073.3	22565.4	27386.2	13088.4	20238	15785.1	11695.8	12871.8	10123.7	11568.2	16919.1	14921.8	[55][M+1]+	-	233	0	0	-	-	-	-	-
372	M328T190	328.249	3.16743	1255.31	1415.83	1586.33	929.65	712.803	1132.6	991.12	1111.07	971.264	1121.81	974.744	1026.49	1047.99	945.08	611.513	794.463	809.033	678.203	1133.76	1143.71	894.482	973.628	860.225	994.127	1290.86	1113.25	1000.34	2280.83	1787.04	2073.37	1309.64	1081	1669.72	1885.38	1923.52	1325.4	-	-	4183	1	0	-	-	-	-	-
373	M328T275	328.285	4.58944	12983.5	10549.8	9258.67	41164.5	22086.1	22403.3	28726.6	24598.1	25989.6	24949.3	35517.3	27750.2	32754.4	31987.2	33886.2	22402.4	20570.1	13356.9	28695	25842.5	32493.1	10916.4	11808.7	7751.86	30578.8	28624.1	8477.67	50969	32894.2	32276.6	33510.8	37834	38173.1	39826	24382.3	36516	-	-	4255	1	0	-	-	-	-	-
374	M328T301	328.312	5.01138	4156.89	4743.64	4129.65	16160.4	5144.68	7209.11	9033.75	9377.23	8940.75	10247.7	6970.74	8062.48	3691.17	4439.99	5000.63	3812.35	4220.96	7452.54	12929.4	13195.8	15091.9	18796.3	27270.3	25031.6	17799.4	13573.4	20395.3	10390.4	8579.83	7570.42	5774.71	6573.82	5337.14	5399.21	4813.55	6794.44	[54][M+2]+	-	92	0	0	-	-	-	-	-
375	M328T324	328.321	5.39473	28930.3	31844.4	30763.1	73242	32932.2	36679.1	89147	29993.1	40717	96949.7	53541.3	39519.3	67473.5	28817.9	40610.8	29304.4	44887.7	26748.9	12233.7	11249.7	14555.3	13844.1	13649.1	11611.4	11382.4	42533.5	80457.2	10355	9054.97	9857.35	84193	83025.2	80086.9	111969	10935.5	24102.8	[56][M]+	[M+H]+ 327.314	276	1	0	-	-	-	-	-
376	M329T251	329.16	4.18237	8500.88	9560.56	12398.4	9904.57	10601	7745.33	8710.88	10357.7	9769.46	8478.26	12495.8	17092.9	10072.7	9093.21	9677.92	9724.51	9888.98	8405.65	15571.5	11564.7	8945.92	22396.7	15108.2	12652.3	14387.2	10151.6	8560.59	12724.8	15638.9	16357.6	11502.4	15914.9	11076	14745.8	23173.1	9418.91	-	-	2588	1	0	-	-	-	-	-
377	M329T278	329.194	4.63019	7813.81	6070.42	10061.9	6419.78	6201.97	9093.96	9019.01	9691.09	9314.59	13104.2	10286.7	6964.52	9662.9	11021.6	11245.2	7805.92	14675.3	10029.6	8726.92	5939.16	11209.8	5843.3	9933.58	8817.98	7849.56	5628.62	10649.4	7225.96	8938.62	11035.6	14284.1	3743.72	9818.95	7711.77	15706	6034.96	-	-	3386	1	0	-	-	-	-	-
378	M329T995	329.194	16.5818	133903	50270.6	41664.5	170084	27684.4	49251.6	48164.1	114400	45534.9	44126.4	32526.6	26147.4	106609	27840.9	81220.2	27448.9	41814.1	46866.6	25831.4	45472	136857	47262.3	49791.3	71332.2	52569	55198.5	49396.9	35326.4	101332	45858.2	43645	47284.1	31486.6	24686.9	22725.9	17495.5	-	-	4712	1	0	-	-	-	-	-
379	M329T949	329.194	15.8207	45108.9	30971.9	54191.9	33007.3	33095.4	29631.7	37010.4	35775.2	28161.1	32138	33549.5	40149.4	76985.7	27416.5	69891	67487.2	31979.9	25759.2	33277	40670.8	33906.3	35538.9	37427.4	96231.2	47207.2	36105.7	25609.8	21158.8	25932.4	30570.8	35117.9	31332.6	23604.8	32778.1	27303.7	28184.8	-	-	443	1	0	-	-	-	-	-
380	M329T872	329.194	14.5279	37726.4	46867.4	41416.1	120978	44786.1	21434.7	25993.6	31027.5	43973	43733	41615.6	64682.5	26857.1	23214.9	25110.1	27054.2	119300	27195.3	43041	47240.6	43443.1	41464	50577.6	65128.7	35721	50750.6	48482.6	22487.2	26290.9	47139.9	45006.5	49704.9	35783.8	44745.7	44502.1	55969.2	-	-	381	1	0	-	-	-	-	-
381	M329T302	329.222	5.03705	22514.9	28334.5	19213.2	20220.8	25657	20156	33874.9	21697.9	18559.1	30553.3	28336.7	23153.6	16832.1	21916.2	25037.4	30112.9	24351.1	26369.5	25018	22628.2	31764.7	19067.2	21793	23489	24050.1	23254.7	22265	24759.7	24450	31869.3	20691.8	22118.2	21876.1	23695.4	21625.1	25520.5	[57][M]+	-	4670	1	0	-	-	-	-	-
382	M329T345	329.243	5.75497	5960.45	5166.37	4880.11	8129.8	6301.05	7433.06	8076.1	6571.01	8396.54	10862.4	7602.66	7364.77	11033.4	8775.39	7102.12	8095.54	6967.72	7030.6	10986.6	13344.8	13095.3	13264.3	20175.2	16276.9	10951	9702.1	15606.9	7418.21	9778.72	8954.75	10002.7	5673.51	6793.85	6747.1	8687.44	8053.4	[58][M]+	-	4603	1	0	-	-	-	-	-
383	M329T275	329.288	4.58117	3142.88	3129.7	9266.32	9732.95	6065.68	6138.5	7706.49	6046.31	9074.33	7974.11	10673.7	12111.6	9733.27	11006.1	8077.17	8150.93	5593.78	4901.94	7272.99	8063.72	5135.88	6680.7	7588.22	6238.71	8328.31	6220.05	6467.19	12055	9051.74	7888.39	10675	13920.8	11766.8	14980.9	8859.33	8940.5	-	-	4259	0	0	-	-	-	-	-
384	M329T605	329.32	10.0856	3290.66	2614.04	5560.03	2967.25	2968.54	1975.15	1096.36	1840.33	1517.19	2587.63	2196.05	1564.29	1997.95	1827.04	1295.81	1877.09	1079.32	1255.8	2303.68	2479.39	2201.12	1749.39	2145.38	1501.85	2112.6	2047.78	2622.36	2681.86	1418.63	2429.64	1720.37	1012.48	1646.75	1737.29	1848.61	1485.69	-	-	140	0	0	-	-	-	-	-
385	M329T324	329.325	5.39472	6659.62	8217.65	6860.91	17222.3	8065.28	8831.54	21336.2	7227.1	8987.04	22684	12294.6	10398.4	15243	6171.47	10338.2	6634.02	10387.1	6979.8	2939.43	2843.63	3112.11	3422.36	2943.32	2734.88	2913.39	10351.5	20290.5	2760.83	2650.63	3139.81	21193.6	21415.3	18205.7	25121.9	2396.99	5338.05	[56][M+1]+	-	276	0	0	-	-	-	-	-
386	M330T302	330.226	5.03483	5901.19	7485.5	6567.95	3373.68	5246.55	4142.77	6185.44	6923.63	5727.26	4736.81	4471.12	6587.14	3393.44	5523.95	4379.46	3803.46	5549.17	5288.46	6456.1	4314.3	7235.86	5510.97	8722.6	5091.88	6988.26	5055.75	6314.35	6395.09	5926.09	5934.85	6279.85	5900.94	4604.16	6922.67	5083.37	6201.69	[57][M+1]+	-	4671	0	0	-	-	-	-	-
387	M330T345	330.246	5.74628	1372.79	1635.54	1594.63	1961.2	1734.87	2012.64	1938.91	1278.01	2437.89	2305.23	1578.77	1825.6	2586.86	2112.63	1635.13	2184.28	1734.76	2009.77	2477.67	3652.24	2956.33	3624.13	4117.66	3995.27	2916.81	2377.45	3473.79	2542.86	2307.02	1529.62	2071.7	2020.84	1813.84	1774.45	2250.17	1805.66	[58][M+1]+	-	4603	0	0	-	-	-	-	-
388	M330T98	330.264	1.6309	6708.61	5460.04	4336.96	3344.85	2573.41	1957.46	910.638	2075.22	3603.01	1386.07	1219.32	1017.21	2309.27	1571.33	1489.05	1683.07	900.216	1071.37	5147.21	5260.8	5026.49	3548.63	4289.1	3208.4	6921.51	6144.56	4168.09	8458.72	7178.02	10397.7	8295.72	8818.07	9724.54	4958.68	9207.82	3767.43	-	-	514	1	0	-	-	-	-	-
389	M330T129	330.264	2.15076	31119.5	33230.3	11866.5	15492	16665.6	16072.5	1483.36	3271.96	5380.73	1997.03	3154.62	1877.42	2755.98	1906.53	3047.38	2312.42	2300.3	1144.58	3601.02	3154.79	3102.5	2073.57	1825.63	3645.02	3024.9	6317.13	1774.84	12184.2	5143.07	7710.84	7794.89	8811.45	8791.58	6781.81	9849.58	5990.22	-	-	4822	1	0	-	-	-	-	-
390	M330T290	330.3	4.82796	5786.05	6985.73	5324.26	14715.8	10573.1	12632.1	15328.3	15206.4	14096.3	13317.5	14690.1	12722.3	13014.9	13394	17235.4	12977.5	8888.16	6860.93	11669.2	13202.9	13733.1	5148.79	7757.95	6532.53	13415.2	12007.7	4537.83	32892.3	13287.2	15619.5	13613.9	14287.3	14281.5	19882.4	11067.4	16989.3	[59][M]+	-	1554	0	0	-	-	-	-	-
391	M330T305	330.3	5.08238	10651	16472	11580.7	12119.1	12794	10016.8	16283.8	11043.2	10248.7	16107	12372.8	11870.8	16498	12812.1	13544.9	13903.6	10706.4	12923.3	13079	9490.32	17113.5	12494.5	23231.3	12007.1	16350.4	12356.2	10355.7	13110.1	11622	15177	9726.81	10588.1	12184.8	1750.25	16288.6	13018.4	-	-	2563	0	0	-	-	-	-	-
392	M330T263	330.337	4.38792	45269.7	41359.1	43367.1	46036	43165.8	59123.9	89313.8	37950.2	14090	63150.6	51322.3	43322.7	98604.5	33855.4	68661.1	58153.3	56051.2	48694.8	13286.4	14749.8	47121.5	59378.8	53629.5	86594	34058.3	17431.1	52625.6	36740.5	43476.4	38376.5	16598.5	35205.9	47068.7	63889.3	56971.7	14900.5	-	-	4496	1	0	-	-	-	-	-
393	M331T65	331.189	1.07949	14930	15197	14137.2	36360.5	29779.8	33751.1	1593.51	1086.97	1836.18	1726.82	1066.45	1301.71	4029.03	2947.41	2235.15	1637.01	1209.49	947.318	1939.33	1361.82	1228.61	1041.33	1362.76	1082.83	1571.76	3049.6	787.421	1565.3	1378.28	1681.38	1328.71	1260.58	1682.76	1402.33	1019.6	1185.54	-	-	4225	1	0	-	-	-	-	-
394	M331T106	331.267	1.77493	1023.47	1058.77	1000.84	937.397	896.231	856	400.663	642.088	992.344	464.492	614.188	365.236	611.262	522.554	435.617	464.639	383.726	393.134	638.514	1426.85	1236.85	894.588	786.322	661.548	1546.66	1521.97	1067.79	2161.59	1942.52	1192.53	2663.07	2848.06	2469.03	1391.82	1010.75	1173.28	-	-	558	0	0	-	-	-	-	-
395	M331T538	331.284	8.9666	6078.84	12388.3	9029.15	4529.22	4250.58	8123.27	1392.71	3505.17	3002.72	2471.6	3131.7	878.381	3546.11	1809.93	4028.5	914.432	3994.85	4924.49	10912.5	12037.9	8394.44	16383.9	12407.6	9821.24	10166.8	11097.7	9220.6	18897.6	4843.87	8164.9	11647.5	13093.6	7801.74	6561.64	3998.01	7327.6	-	-	1073	0	0	-	-	-	-	-
396	M331T305	331.284	5.08188	136631	127129	113774	64469.3	96779.5	81853.2	21558.8	16973.5	18703	25288.2	20172.9	16660.7	17617	16631.1	19527.2	15564.6	13297.9	12722.9	26890.6	24985.6	29562.6	31680.8	29375.3	34261.6	33522.1	31519.2	27187.6	25755.3	22139	24184.8	27261.9	31835.1	32271.2	27961.7	21023.3	20482.5	[60][M]+	[M+H]+ 330.278	132	0	0	-	-	-	-	-
397	M331T290	331.304	4.82932	5867.33	6804.84	8144.03	3986.72	2152.08	4206.89	3509.48	3665.31	3110.07	3521.19	3186.78	2585.58	2888.57	3039.58	4054.53	3158.02	1966.91	1365.21	3768.39	3868.36	4739.16	1953.54	3608.16	3195.49	9436.22	4137.78	5001.65	6146.27	3769.48	4380.6	4912.95	6172.63	3199.54	4207.3	4301.86	2812.14	[59][M+1]+	-	1523	0	0	-	-	-	-	-
398	M331T341	331.321	5.68553	2099.1	2722.05	2516.84	2028.62	1917.38	1777.66	3342.41	2454.33	1943.55	2930.85	1882.03	1978.02	2365.71	2084.27	2027.3	2250.46	1658.37	1968.09	1950.37	2071.86	2182.98	1854.76	3127.79	2000.98	2746.81	1887.62	860.862	1514.7	4647.66	1984.36	2467.74	4861.51	3873.9	1402.38	2302.65	1268.73	-	[M+Na]+ 308.331	344	0	0	-	-	-	-	-
399	M331T268	331.34	4.46532	11809.9	6577.86	11199.6	15732.8	6309.03	10774.4	8428.06	8366.28	11311	12328.1	9574.79	11976	19130.2	12837.8	11989.7	14435.3	12190	21484.5	8508.21	11213.2	10575.7	15791.1	8928.23	9575.03	7744.99	14665	16014.4	10395.2	11244.5	11579.2	11344.6	10235.6	11870.3	11702.9	7483.11	9725.13	-	-	4456	0	0	-	-	-	-	-
400	M332T337	332.293	5.61432	6878.05	8849.82	6349.92	7993.54	8396.42	7725.61	9867.66	8007.56	6537.82	8788.22	6637.59	7085.94	9161.02	8531.4	8181.62	6835.61	8053.72	7837.54	7610.94	7568.69	9022.06	6609.52	8667.86	9211.19	9640.26	8575.59	6858.35	7354.1	7026.31	9343.76	7915.46	7019.43	7780.17	6442.43	7978.42	6540.46	-	-	4114	0	0	-	-	-	-	-
401	M332T305	332.288	5.08842	28952.6	27346.6	28406.6	16311.9	22354.8	17600	6451.52	4514.72	5119.62	5713.9	3767.1	4164.63	4723.35	4418.35	4660.3	3621.8	2922.95	5694.03	5955.03	6559.32	8754.02	8392.3	8855.31	10500.3	9029.93	9271.69	8640.81	6591.88	6939.33	7444.24	7179.87	7236.05	7034.85	6387.09	5807.58	4687.09	[60][M+1]+	-	132	0	0	-	-	-	-	-
402	M333T1004	332.916	16.732	1878.14	1178.86	1669.24	1195.39	1321.64	1109.79	842.913	1242.38	1332.66	1668.75	969.557	897.261	1307.03	1287.94	1222.6	1644.62	964.465	975.875	1260.9	1408.19	1421.51	1763.75	1565.69	1205.61	1656.83	1301.83	1875.34	1190.87	1182.2	1204.92	1538.26	1856.44	1196.55	1406.59	1370.85	1718.66	-	-	4902	0	0	-	-	-	-	-
403	M333T278	333.146	4.63	2549.66	806.272	2099.57	4062.3	2207.36	1711.35	2829.67	3611.51	3104.7	3084.72	2783.53	2967.62	2842.71	7619.84	3456.69	6470.47	6363.76	3628.36	3340.63	3379.67	2635.13	6973.56	2457.05	4242.92	3715.4	2921.3	2424.08	2232.31	3482.1	2095.59	3221.1	3395.05	6104.35	3234.3	1543.27	4200.79	-	-	3387	1	0	-	-	-	-	-
404	M333T203	333.183	3.39063	7841.99	9377.6	9754.28	3956.59	3970.99	4094.89	1680.07	2510.95	3615.67	2528.79	1699.78	1443.96	1933.25	2049.52	2289.68	1999.39	1253.28	1137.67	3485.75	2351.13	2130.83	3573.98	3696.93	3596.29	4410.94	2877.52	2354.91	3849.7	2778.94	3988.76	4133.08	3735.92	4276.38	3447.03	4220.08	3467.9	-	[M+K]+ 294.221	279	1	0	-	-	-	-	-
405	M333T150	333.204	2.49878	4787.14	2340.27	6263.08	6250.49	2187.43	5687.11	1239.11	2285.14	1982.57	1428.43	1780.59	2606.39	1548.5	1374.46	3034.21	1539.67	1742.17	965.26	1793.5	1684.52	1751.21	1826.23	1736.91	2332.01	1968.71	1980.84	3015.58	8647.35	4618.5	5478.27	3600.7	3846.36	3601.21	6888.37	6477.31	4500.25	-	[M+Na]+ 310.215	473	1	0	-	-	-	-	-
406	M333T72	333.204	1.19699	12979.5	12239.2	12156.1	12174.8	14287.3	9468.35	2372.15	3735.8	3531.08	8869.8	8279.46	1790.92	3328.85	11498.9	3621.09	3127.78	1693.35	1406.1	2660.75	1670.57	1885.18	2164.06	1852.14	1850.62	2886.09	2617.01	1838.69	11858.9	10413	2020.86	8984.59	8782.65	2760.47	13294.8	13111	12813.6	-	-	498	1	0	-	-	-	-	-
407	M333T90	333.204	1.50638	21056	22930.7	20417.6	19859.4	24889.1	7831.85	1111.47	1354.63	3899.03	2040.85	2042.54	1650.01	3264.14	2648.9	4298.03	3256.39	1277.23	1565.57	1994.88	1558.19	2095.22	2505.88	1847.93	1782.08	2851.43	2477.45	1969.74	2642.5	2445.83	2555.23	2394.08	2773.34	2731.77	3289.67	2613.78	2791.18	-	-	461	1	0	-	-	-	-	-
408	M333T190	333.204	3.15898	4340.03	4992.63	4439.21	2738.26	3285.69	2801.91	1114.86	2551.89	1726.27	1810.14	1844.75	2038.16	885.5	1415.15	1916.97	1725.35	1367.79	1441.6	2541.35	1894.25	2407.38	1609.68	1942.08	2464.64	2328.22	2216.52	2417.16	5667.23	5224.53	6223.58	3770.08	3928.21	3398.75	4052.58	6115.88	3951.43	-	-	4184	1	0	-	-	-	-	-
409	M333T268	333.24	4.46162	3521.21	6380.58	5320.23	7597.81	5121.91	4919.83	3701.1	3232.65	5052.74	3607.25	1749.59	2562.05	3891.78	2664.78	2608.39	2840.52	2620.43	2865.78	4866.05	6048.43	7650.33	5585.97	5558.61	4022.52	9191.55	11020.1	10069	4424.29	4843.73	5119.42	6407.35	7843.5	7893.95	5746.7	6940.85	6578.14	-	[M+H-C3H2O3]+ 418.242	376	1	0	-	-	-	-	-
410	M333T348	333.277	5.8041	2227.67	3292.82	2782.81	11401.6	10185.3	16054.3	3568.39	2562.46	3715.29	3167.06	5067.18	3335.89	1856.4	2605.93	2508.62	2077.49	2413.51	1458.41	8794.84	10583.1	8331.89	10382.9	10434.9	12234.6	8646.88	8790.57	10058.5	8191.01	6946.97	5812.34	8506.66	7659.79	8150.68	3525.3	3949.03	5434.52	-	-	4366	1	0	-	-	-	-	-
411	M333T280	333.3	4.66618	4349.52	5118.35	4353.65	5856.95	6438.65	4893.36	3964.51	4971.58	6648.35	6669.84	9971.31	6541.22	8314.59	5990.22	7466.77	4084.81	4533.53	5211.07	4051.67	3522.77	5411.07	10494.6	6460.85	5999.86	13841	7909	4756.17	8985.74	3981.58	4132.6	5939.99	3962.68	4422.65	6622.99	7065.06	6359.31	-	-	2620	1	0	-	-	-	-	-
412	M334T184	334.295	3.06295	900.777	1152.39	1437.45	4008.99	2168.74	2952.77	1273.66	1051.94	1840.69	1574.83	844.004	1420.34	1313.73	1328.91	2353.97	2240.76	903.292	526.793	1035.09	860.926	1598.31	1437.26	1213.83	1496.72	1435.75	1476.38	1065.9	1081.3	1088.89	1358.23	1377.83	927.245	875.053	1235.82	1007.96	815.727	-	-	549	1	0	-	-	-	-	-
413	M334T326	334.31	5.44064	2682.57	3876.14	2668.08	2586.4	5471.31	2634.63	5061.8	2590.54	3722.1	3477.5	3896.6	2892.01	3377.59	2231.85	2441.01	3108.79	3237	2977.03	2814.42	2237.65	4026.72	3008.76	4212.08	3202.58	3582.02	2766.28	3520.81	3875.39	2299.78	3453.04	2465.71	3053.9	3587.94	4028.31	3850.88	3223.46	-	-	4776	1	0	-	-	-	-	-
414	M335T206	335.198	3.43883	1875.2	3908.08	1831.42	4604.84	3613.51	3165.87	3410.6	4331.45	6775.12	2564.03	2951.96	2466.53	4465.83	4386.76	3163.34	5450.3	1879.21	2257.7	8411.01	9612.79	9822.74	7124.15	7075.4	6188.43	13323.9	11169.3	6585.26	10712.6	10363	9112.68	13618.5	11707.4	15241.9	7636.37	10555.8	6573.69	[61][M]+	-	2915	1	0	-	-	-	-	-
415	M335T106	335.22	1.75896	47033.5	47088.5	50249.7	34432.2	47419.6	41165.9	2949.89	8550.08	11159.3	4711.23	2881.08	3965.62	4383.68	6555.36	7246.67	5353.53	2639.64	3177.51	8374.17	10511.5	15670.3	14394.3	6964.71	11590.8	11656.3	11869.4	13336.9	9340.36	10797.6	6094.12	15738.5	16334.4	16033.7	10279.6	9862.23	9103.08	[62][M]+	-	390	1	0	-	-	-	-	-
416	M335T142	335.22	2.36658	27654.8	31295.4	29320	23866.9	23112.6	22499.9	4198.44	9235.63	9365.84	6280.31	4375.68	5231.44	4195.35	4960.9	8305.91	15583.3	3906.59	3230.38	8402.22	9903.33	10951.1	11227.4	22515.4	12447.4	29862	13101.7	20750.1	20670.9	11565.4	11212.9	13743.5	10959.3	15318.6	13029.3	19522.7	9977.04	-	-	455	1	0	-	-	-	-	-
417	M335T128	335.22	2.12667	29004.6	31530.5	55687.6	21888.9	26548	14838.5	3410.03	9774.69	10357.4	5156.42	6659	6673.79	6988.82	6056.48	7051.79	8644.75	4892.08	4690.36	10190.6	7933.41	8985.89	9649.99	10098.3	9881.27	14266.9	12123.1	9262.06	29637.1	18875.9	20881.9	23435.1	23678.2	21561.6	30726.9	14670.6	16486.2	-	-	438	1	0	-	-	-	-	-
418	M335T69	335.22	1.14787	18509.8	15868.7	17726.2	15251.1	18898.1	16452.4	1499.47	1601.47	1907.4	1925.86	1436.09	1464.29	1814.6	3045.66	3404.67	2527.63	1251.54	1727.01	1961.18	1787.98	1594.58	3558.49	2452.62	7627.99	3218.39	2681.42	2576.92	6224.89	2254.94	2105.55	1843.08	2117.38	1855.69	2388.38	2043.14	1976.24	-	-	4742	1	0	-	-	-	-	-
419	M335T292	335.222	4.86701	7544.7	8249.55	7651.11	7273.94	4293.34	5693.51	6849.78	5044.09	8230.17	4821.25	9225.27	5563.06	6963.26	5949.72	5617.9	6087.33	5313.7	6400.87	4544.52	8589.4	6401.09	9091.52	7994.8	6289.71	11242.8	6325.81	6742.86	5323.84	6107.1	7743.25	7672.67	6157.6	5842.73	5369.77	2215.59	5180.8	-	-	335	1	0	-	-	-	-	-
420	M335T45	335.244	0.745283	6487.63	7431.28	5981.69	4330.1	2780.47	3654.31	1586.16	3371.86	2518.82	2504.33	996.202	1032.32	1469.47	1563.23	2135.36	781.519	1089.13	1078.13	1530.9	2145.3	2827.13	917.875	1615.53	2376.66	2589.98	2085.14	2081.78	1342.73	1451.1	1130.81	872.188	777.744	966.839	1496.07	2033.99	1008.22	-	-	3824	0	0	-	-	-	-	-
421	M335T419	335.258	6.98751	85178.9	59130.9	81880.5	41371.3	38367	83104.5	19717	25418.3	22496.2	12542	25828.6	8177.8	12769.1	18959.9	16662.2	17587	7327.24	11322.8	30668.2	34252.7	53640	40166.7	23172.6	23332.3	47308.9	27548.1	28008.8	53365.9	42149.5	17152.5	24798.5	26323.5	27481.9	21009.6	20249.7	24694.4	-	-	22	1	0	-	-	-	-	-
422	M335T304	335.256	5.06355	29051.5	37920	24130.1	27373	30385.7	25151.8	42839.9	28188.2	34033.1	36700.4	26472.9	30040.1	38073.5	27642.2	29006.8	26432.2	31285	29973.9	24342.2	29134.2	35491.5	24275.9	31478.6	23655.4	28064.9	24620.7	26021.2	28537	29460.9	36836.7	28773.7	27097	30604.8	28114.3	47330.7	26914.5	[63][M]+	-	428	1	0	-	-	-	-	-
423	M335T209	335.258	3.4849	10863.9	12029.1	10450.8	7664.24	6453.23	5363.06	4921.56	5778.73	8312.11	4789.44	4961.43	4312.8	6142.35	4027.02	3818.04	5413.98	5079.57	2922.46	31533.6	35806.7	33688.8	19343.5	17982.2	10144.4	39447.2	40506.7	19877.6	32843.1	36982.8	20702.6	60075.7	62730.1	59575.4	26718.8	26865.3	22518.6	[64][M]+	-	2413	1	0	-	-	-	-	-
424	M335T519	335.258	8.6545	111931	101377	41361.9	14850.7	23183.1	20462.5	3344.84	4723.03	3772.07	4638.16	5613.21	3714.01	3621.97	4017.85	4034.36	3204.01	2952.59	3591.65	15367.1	15966.2	12508.1	17810.1	17812.5	24558.4	17383.1	10710	12527.1	16628.4	7626.28	12737	14681	16355	12634.4	7970.43	5010.47	10209	-	-	971	1	0	-	-	-	-	-
425	M336T206	336.201	3.44104	1124.71	648.437	1111.62	1395.34	1303.68	1713.27	1419.44	1713.37	1961.58	1494.81	614.705	770.267	1732.93	1301.81	1255.45	1212.94	816.673	1207.9	2425.53	3614.23	750.474	2406.43	1782.74	1121.24	3256.09	2330.02	2225.93	2938.49	3136.89	1664.19	3030.01	3653.32	3210.23	2531.33	2730.98	2309.54	[61][M+1]+	-	2931	1	0	-	-	-	-	-
426	M336T106	336.223	1.77033	10417.3	10413.3	10370.5	8720.44	9968.08	9174.95	937.967	1506.67	2118.56	885.43	970.47	1053.54	1309.25	1474.38	1730.44	1434.47	907.622	825.067	2453.74	1899.3	2221.02	2542.4	1786.6	1420.08	2895.2	4596.83	2914.56	3205.85	1996.31	2516.14	4142.85	3421.2	3961.92	2363.3	3862.46	2549.39	[62][M+1]+	-	390	1	0	-	-	-	-	-
427	M336T312	336.22	5.19332	3705.23	3805.83	3149.64	5308.15	3043.91	3107.75	2479.82	1641.12	2382.15	1933.13	2694.47	1639.08	1880.69	1737.14	2116.42	1699.54	1508.08	2340.61	4148.15	3520.82	3891.75	3387.03	2898.81	4692.02	2957.65	2867.84	1621.36	2769.04	2500.02	3501.84	3414.45	2251.69	3888.06	1804.2	2042.63	3276.66	-	-	1399	1	0	-	-	-	-	-
428	M336T290	336.224	4.82851	5094.91	6160.93	3877.14	1424.38	4387.25	6109.11	2205.99	2338.99	2469.95	2382.78	690.037	2537.21	2504.83	1726.73	1585.18	2369.77	996.263	2080.95	5669.18	4620.69	4603.28	3232.49	6931.71	7771.66	3308.25	3714.7	3878.39	1832.82	3866.94	3452.15	3754.11	4010.14	3449.43	3017.59	3888.55	2301.55	-	-	1542	1	0	-	-	-	-	-
429	M336T238	336.23	3.97032	2197.63	2582.51	2901.15	3453.19	2569.83	2302.11	1742.23	2307.06	2189.85	1822.44	2003.1	1905.6	1514.57	2037.28	2094.43	1717.79	807.234	1865.51	2879.87	2961.77	2392.59	2594.45	2657.7	3048.31	1991.41	2926.92	2267.36	2164.06	2077.99	1871.02	2192.65	1602.82	2233.77	1568.3	1275.82	1037.42	-	[M+K]+ 297.267	285	1	0	-	-	-	-	-
430	M336T44	336.239	0.73175	4742.06	3619.74	848.763	1420.41	852.797	1293.13	1298.39	1642.61	820.804	758.919	499.717	478.238	737.216	890.131	832.002	585.431	414.193	524.421	2204.92	2072.27	2478.84	1392.17	1282.22	969.235	2675.79	2963.51	1212.52	1360.66	649.297	776.952	615.337	861.077	602.971	1281.4	1218.76	2097.14	-	-	263	1	0	-	-	-	-	-
431	M336T304	336.259	5.06217	6457.05	9981.22	7091.01	6927.78	9161.5	5617.87	10241.8	6661.64	7329.31	8861.3	6714.29	8420.51	8984.59	6344.37	6443.52	7137.34	6069.09	8605.79	6566.75	7400.36	10035.2	7378.31	6391.49	6756.59	8721.11	5743.81	7570.14	6799.92	7156.48	8778.2	6775.86	8731.06	6740.28	6621.87	11058.5	6950.21	[63][M+1]+	-	428	1	0	-	-	-	-	-
432	M336T420	336.262	7.00409	23978.1	23850.5	28056.9	9246.7	14869	18662.5	5211.17	5790.77	5441.95	4245.77	5924.17	3823.65	3728.6	1616.93	4046.58	4963.99	1648.07	3077.79	14978.9	9168.15	10026.9	8103.26	5845.3	8217.06	9985.84	6778.17	3531.27	9351.26	13497	2831.75	18608.3	9870.94	8506.26	11340.2	8102.42	7030.21	-	-	886	1	0	-	-	-	-	-
433	M336T209	336.261	3.48488	3157.74	7017.89	1305.2	1648.92	1347.11	1218.61	1382.42	1703.91	3082.2	1530.15	1685.15	1478.89	996.018	1403.92	1112.38	1107.43	1606.55	1239.07	9399.1	10178.9	10093.7	5772.66	5844.98	2590.27	11266.8	10511.1	5905.59	8749.17	10054.6	6230.31	13859.9	16204.2	18946.8	4807.89	9085.36	6491.45	[64][M+1]+	-	2413	1	0	-	-	-	-	-
434	M336T308	336.287	5.13597	5393.49	3610.15	2852.96	4481.7	3664.53	4306.17	6555.36	6160.42	7355.98	5572.96	5570.28	1948.33	4985.5	2853.75	4337.8	2651.82	3274.68	3728.51	2742.51	6534.77	8803.11	5261.86	3083.21	5559.5	4360.01	7668.95	8165.39	7154.5	973.841	1862.77	5496.03	5840.73	5188.06	5550.22	3018.11	1849.78	-	-	2703	1	0	-	-	-	-	-
435	M336T271	336.311	4.52047	33886.5	6665.68	34066	20220.3	17781	8484.82	10047.9	10404	9513.12	11226.1	7740.58	7353.65	24011.4	17645.4	13193.5	6899.06	13437.4	14042.4	7760.64	8124.57	11446.1	15521.9	14629	13933.7	15458.5	15218.1	3948.75	4522.97	6582.4	13704.2	7545.24	7995.19	9383.94	3894.05	6278.98	7163.97	-	-	4373	1	0	-	-	-	-	-
436	M336T345	336.326	5.75537	15643.8	17120.2	12826.2	16398.2	18396.8	15369	16728.3	13567.1	13443.5	19949.1	16113.6	15526.9	18873.6	14302.6	14283.9	16457.9	18529	14091.3	14212.4	13890.2	19324.9	15808	20287	17175.5	19442.5	14478.8	18713.9	13808.9	14472.5	21176.9	13663.9	13330.3	11028	13758.1	20140.2	14753.2	[65][M]+	-	4604	0	0	-	-	-	-	-
437	M336T274	336.327	4.57343	11494.9	14321.4	12124.5	11283	10298.5	20738.5	12035.6	5355.82	8945.86	14742.6	7893.54	11434.3	19558	14151.3	10900.9	14052.9	13351.3	6044.01	6071.24	15348.5	10453.5	11509.7	13880.7	13951.3	15475.6	20173.4	11049.3	13452.8	14318.1	15270	10918.7	4424.54	16147.1	16928.3	14304.3	12942.4	-	-	2766	0	0	-	-	-	-	-
438	M337T999	336.928	16.6582	4733.63	4641.04	4119.75	4716.13	4609.31	5691.07	4538.13	5773.65	4515.92	5578.82	5151.77	5777.89	5092.45	5433.77	4134.38	4578.91	7228.38	4629.35	5119.06	5050.64	5717.47	4724.99	4186.27	4608.77	4909.92	5427.34	7940.44	5112.52	3264.89	3851.11	4698.38	5321.48	6322.84	4941.13	5678.4	4346.06	-	-	4780	0	0	-	-	-	-	-
439	M337T200	337.075	3.33735	1992.7	2118.72	1721.48	2153.61	1450.92	2271.49	2498.61	2498.97	1919.73	1953	2014.2	1948.78	1947.31	2212.13	2362.36	2472.31	3564.71	2323.33	2400.41	2182.05	2294.46	2310.53	2101.01	1217.87	2269.66	2111.03	1563.08	2360.49	2721.48	2224.02	2368.13	2218.54	2408.67	2456.28	2216.87	2553.84	-	-	4884	1	0	-	-	-	-	-
440	M337T231	337.2	3.85577	2229.87	1926.47	2137.53	4047.53	3738.37	2543.35	2082.81	2551.97	2575.35	1733.53	1757.41	1827.61	1878.75	2705.59	2659.33	1608.86	1483.99	1545.09	2133.96	2572.9	2956.59	1861.05	3376.09	2771.25	2591.79	2180.33	1251.49	2407.34	2698.86	2676.15	2606.45	3065.92	2980.91	2011.88	2264.69	2202.15	-	-	2778	1	0	-	-	-	-	-
441	M337T143	337.235	2.38424	27626	14231.4	13511.5	17726.4	51596.1	18363.8	2862.54	4210.65	8853.23	3574.88	2141.8	1849.54	2097.64	2789.32	5803.71	2283.41	1447.08	2456.74	11667.8	9563.57	33407.8	29447.5	13328.1	13491.1	14525.9	31995.6	8964.86	11059.5	5427.25	8464.41	10962.3	12320.4	9329.79	9639.03	5507.31	7772.33	-	-	4758	1	0	-	-	-	-	-
442	M337T290	337.236	4.83232	9280.11	4398.67	7416.22	7002.14	9991.45	2607.97	5939.26	3593.66	5051.77	7871.32	8114.92	6464.63	7203.73	9452.5	9900.72	6267.38	8925.36	9122.23	4444.28	4637.89	8273.07	8619.25	12436.4	2095.1	8398.12	8358.04	8207.96	7349.28	7754.88	6251.27	7785.58	7872.86	3084.54	6635.12	6502.01	6222.55	-	-	1536	1	0	-	-	-	-	-
443	M337T157	337.235	2.61013	7053.72	9296.22	9320.07	10511.8	13595.3	11232	1973.18	1990.01	2124.8	2325.02	1421.31	1430.58	1339.17	1620.43	2216.3	1705.2	1121.4	1442.22	11897.5	10496.4	10864.9	8539.82	8163.56	7987.35	10754.7	9180.85	5485.06	7082.95	5679	5052.07	12546.4	6895.35	9988.21	6112.76	4825.63	7941.91	-	-	372	1	0	-	-	-	-	-
444	M337T128	337.235	2.12647	7584.42	8576.11	9195.14	11589.6	13015.1	11605.3	2445.64	2561.1	2601.88	2570.54	1843.33	1870.55	2042.23	2191.19	3704.59	2077.21	1476.19	2024.26	7568.13	7147.15	7534.03	6955.6	7591.46	8314.72	10828.8	8026.85	4603.88	5495.81	3268.93	4990.29	7012.78	6870.26	7087.36	4982.43	4060.73	5250.04	-	-	4702	1	0	-	-	-	-	-
445	M337T544	337.274	9.06032	177151	246073	234297	365267	355389	428424	111664	118254	8448.14	41382.6	109051	38912.9	24463.2	19067.4	23403.3	15088.5	39129.6	27402.4	586850	508991	513441	653306	625050	497888	523149	954660	770974	997041	400159	713753	537572	1.09679e+06	700040	560046	533310	447603	-	-	2117	1	0	-	-	-	-	-
446	M337T451	337.274	7.51187	183594	293594	407872	42287.9	87194.9	126702	34431.4	26720.8	22854.4	37092.6	19993.3	19467.7	13787.5	12409.1	9683.47	11726.5	6171.44	9308.8	46253.7	67206.2	57159.5	43831.3	81760.4	40879.1	91525	40395.4	36075.9	33121.2	32313.2	30043.3	20949.2	32182.6	65623.4	22650.1	22312.2	29245.2	-	-	2390	1	0	-	-	-	-	-
447	M337T426	337.274	7.09741	181305	224545	200765	200222	255905	207463	30483.3	38468.7	31402.4	36935.1	31542.7	27150.8	14812.6	14450.5	30235.3	16704.5	7309.28	8789	108643	109507	130056	133953	98772.9	152834	71697.7	107639	92821.6	90183.1	78383.8	66132.6	63577.6	78556.9	74942.8	40136.7	32937.9	65321.4	[66][M]+	-	22	1	0	-	-	-	-	-
448	M337T370	337.274	6.16523	47327	39133.3	39817.9	10277.3	21298.7	19334.2	5933.34	7028.01	6920.6	6586.2	7344.43	6586.66	7361.2	5833.61	6435.05	7783.68	6512.39	7704.14	9738.98	10165.9	11925.8	10999.8	18532.4	11897.5	13186.1	10149	13193.7	13637.8	8399.77	10814	9334.77	7839.43	9714.5	10334.2	8183.61	7727.56	-	-	1883	1	0	-	-	-	-	-
449	M337T573	337.274	9.55355	52156.1	46680.3	36185.1	27001.1	31779.9	58980.6	8930.75	14820.5	7561.46	7734.04	5289.53	5610.23	6203.35	6694.6	7140.37	3980.74	10663.1	10331.2	78690.6	63114.9	67024.9	77768.5	99452.6	69326.5	74930.4	75179	70879.1	115717	52475.7	45057.1	83752.2	94517.9	62837.2	63344.2	47802.2	50101.3	-	-	3715	1	0	-	-	-	-	-
450	M337T480	337.274	8.00028	105871	71872.1	82693.1	21518.9	37135	40240.3	15411.3	22820.6	16397.9	11503.5	13375.6	8140.82	4117.75	7773.22	6862.65	9829.67	6975.85	10017.3	55254.9	53685.7	44654.8	24708.5	25741.3	27505.9	27507.3	50906.7	27967.5	22544.1	22576.1	16592.6	15590.3	17692.6	16068.7	14928.7	13684.7	26506.2	-	-	711	1	0	-	-	-	-	-
451	M337T519	337.274	8.6511	308269	233430	240753	103325	141537	148510	5893.15	7986.34	4986.63	5465.43	9553.83	4271.54	2958.1	2393.99	4537.66	2454.25	2985.36	2933.81	316852	276093	323406	535963	507011	400968	246688	272252	270017	465710	153854	275177	421691	445014	343933	141933	103815	169253	[67][M]+	-	29	1	0	-	-	-	-	-
452	M337T398	337.274	6.6312	147682	148906	153380	34861.9	49295.6	91432.9	5849.77	8051.56	5186.11	4851.39	4025.62	4586.25	2929.17	3358.28	4267.91	3227.41	1844.97	2460.59	41259	51081.6	12854.7	52809.2	28907.2	32956	22955.1	57844.1	15979.2	45108.4	27456.2	34327.5	17775.4	17941.4	19552.9	36608.3	13479.4	21545.9	-	-	3686	1	0	-	-	-	-	-
453	M337T606	337.274	10.0969	25554.8	24450.5	20688.9	14951.7	13282.5	14713	2566.06	3838.09	3287.85	2285.14	2711.04	2215.95	1337.88	2396.39	2033.3	1773.39	2049.92	1345.85	9344.79	8473.85	14005.1	12296.2	11215.1	11688.1	8638.82	12706	9600.77	14995.4	5896.37	8140.19	8070.56	8076.97	7593.45	7581.2	5462.87	8752.9	-	-	2604	1	0	-	-	-	-	-
454	M337T665	337.274	11.0843	15053	28950.9	25063.8	3623.74	8104.46	7800.73	1749.95	4550.56	2576.23	2529.35	8447.43	921.555	1413.9	1167.39	1995.36	1337.69	1195.32	1312.18	5810.47	6911.5	7673.3	10586.3	7761.74	8115.16	7702.99	8725.2	4930.72	23117	6435.35	5058.11	6219.36	5694.98	7066.68	12581.6	5855.48	14058.9	-	-	2552	1	0	-	-	-	-	-
455	M337T289	337.274	4.82078	534486	488289	449071	267024	334733	413841	28155.6	23354.5	17940.6	29998.1	27511.4	22359.2	15676.5	17315.6	24881.1	19302.6	15840.2	14872.2	181528	194448	202760	321370	327837	364115	192758	221836	284330	159690	159213	218190	194421	185912	181161	127623	95092.3	118888	[68][M]+	-	2960	1	0	-	-	-	-	-
456	M337T354	337.31	5.89936	1260.51	5445.23	3898.21	9711.75	6499.4	7183.21	6676.78	4770.36	6894.92	5371.6	9260.9	4851.56	4536.88	3341.07	3114.23	4430.4	3850.39	3191.81	5959.21	6562.07	6939.71	11612.1	10945.3	10129.2	6707.84	7705.32	9624.61	7830.86	5034.86	4764.74	5593.9	5503.58	5729.74	3092.51	4292.35	4705.15	-	-	3607	1	0	-	-	-	-	-
457	M337T318	337.31	5.29263	4295.23	5997.33	5076.12	3426.8	2898.14	4985.72	3553.07	2577.91	4661.48	2519.68	2672.42	1834.28	1798.09	1816.1	2677.18	2754.32	2180.9	2511.09	3221.57	4396.2	4965.94	5520.33	5884.97	7023.14	4129.15	3308.3	4080.24	3489.59	2949.74	2952.55	5709.06	2733.08	4872.75	3608.3	1889.93	3588.51	-	-	369	1	0	-	-	-	-	-
458	M337T345	337.33	5.7551	2726.58	4141.32	2883.95	3605.04	5874.38	3857.92	4654.47	3448.25	3416.32	5052.92	3930.79	3442.25	4370.85	4030.9	3410.16	3923.25	2877.06	4541.82	2897.77	3763.83	3890.61	4503.07	5484.38	3535.37	4960.63	4906	5052.2	3393.57	3583.6	5376.76	3997.98	3432.87	3245.3	4017.8	4066.21	3563.04	[65][M+1]+	-	4604	0	0	-	-	-	-	-
459	M338T200	338.076	3.33652	640.558	570.627	731.268	603.502	500.278	655.65	835.283	855.451	660.983	633.041	603.775	701.72	687.757	646.05	964.068	658.161	1227.11	675.001	668.323	605.995	841.167	855.651	555.761	446.078	841.375	521.033	551.859	721.794	658.291	625.398	762.759	528.428	653.892	915.646	821.193	566.56	-	-	4885	1	0	-	-	-	-	-
460	M338T569	338.218	9.48255	7229.87	5759.93	5909.55	10942.8	14499.8	9233.85	10185.6	16929.9	11817	12524.2	26606.9	5662.62	6135.91	13457	9503.41	11030.6	24671.5	14771.4	17750.5	19826.4	14470.5	13762	14899	18431.3	13745.6	7401.67	16850.1	9720.14	11288.5	8355.91	5514.37	7147.46	7798.46	10346.9	9067.72	13182	-	-	743	0	0	-	-	-	-	-
461	M338T232	338.267	3.85843	97496.6	81556.9	94549.7	311670	207558	243392	245241	226188	260056	239314	202058	220281	214195	222054	270921	204961	126415	155602	233498	228784	221393	267962	245078	249445	147435	256613	199479	174536	194486	202132	186842	181126	191918	120335	123049	124587	[69][M]+	[M+Na]+ 315.278	154	1	0	-	-	-	-	-
462	M338T371	338.272	6.19107	830817	986423	21685.6	799728	6595.04	907153	7142.6	2785.97	4282.99	1.03346e+06	5004.36	4615.86	5039.15	1646.88	5655.18	950706	5279.04	3487.72	733374	781329	930364	755074	5315.82	830000	5784.18	787231	2178.05	753568	3657.87	3959.45	791291	696857	802678	782766	6018.6	733720	-	-	99	1	0	-	-	-	-	-
463	M338T544	338.277	9.06802	45537.3	65067.5	142836	90125.1	102208	112613	31199.4	30634.4	7121.75	11603.2	34753.1	13362.7	4714.81	4645.81	7200.2	5256.51	9618.54	9599.89	144956	131990	118769	182594	146310	221320	136672	234820	193192	239486	106981	171864	133228	160394	162395	151088	98589.3	108534	-	-	834	0	0	-	-	-	-	-
464	M338T425	338.277	7.08999	55522.9	57417	50603.9	60026.4	67610.6	53500	6374.44	7792.78	5841.65	9182.95	13011.8	39724.7	4725.13	4677.05	7617.97	40675.8	34431.2	36088.8	33078	28985	25005.1	38567.9	24041	43182.4	21419.2	31427.1	25128.7	32038.5	19623.5	20253.2	17498.6	21220.7	29780.7	18636.1	13259.1	11764.2	[66][M+1]+	-	22	0	0	-	-	-	-	-
465	M338T289	338.278	4.82067	138622	128590	115063	65870.6	81731.4	104411	7781.81	6661.29	6212.24	7353.06	6709.75	5072.89	5405.62	6035.82	7668.25	4362.32	3168.55	4585.16	44288	49036.9	46340.4	76423.8	78030	92700.3	45723.3	57328	70930.2	42010.1	39532	60623.9	49039.7	46712.9	46112.1	36473.5	22479.3	35305.6	[68][M+1]+	-	2960	0	0	-	-	-	-	-
466	M338T519	338.277	8.65246	75589.2	66768.6	63220.6	26266.5	33609.9	38054.8	19652.4	22282.9	22115.7	23564.2	21710.8	25072.1	21767.9	21291.3	20930.4	24191.7	19953.2	21373.4	86165.5	70550.3	77564.4	137037	118848	102668	62661.8	83020.7	62464	119324	45611.5	70967.4	105833	107361	89007.3	31652.6	23474.3	43060.1	[67][M+1]+	-	29	0	0	-	-	-	-	-
467	M338T450	338.277	7.50378	58039.5	89602.7	86164.5	39020.8	35622.9	27627.3	9726.9	14559.4	32221.7	8920.47	36098.4	6700.44	5348.79	35857.1	11345.2	3517.3	29856.1	2031.73	38458.9	16830.8	27419.6	43437.6	38487.2	36828.8	44548.4	14881.8	8417.27	33296	11897.9	32903.8	32448.3	31120.9	9546.85	33964.8	6279.27	7310.9	-	-	2386	0	0	-	-	-	-	-
468	M338T354	338.313	5.90282	5824.62	6948.78	5070	2283.99	6434.97	2729.25	7206.7	1491.4	6559.08	2055.1	2796.6	1494.05	7834.13	1243.69	6399.67	1300.51	1320.61	6732.23	1276.91	2021.48	2179.43	3375.72	3261.82	2850.23	2638.26	1818.15	3016.72	1861.24	2195.88	1081.67	1291.25	1574.14	1213.21	1271.52	7296.25	1268.81	-	-	3577	0	0	-	-	-	-	-
469	M338T370	338.343	6.17237	836491	1.00192e+06	841310	813767	1.09585e+06	911678	1.02893e+06	827316	725440	1.09262e+06	840991	776541	978065	702812	856316	940143	942453	935975	751778	804960	971025	784166	1.05837e+06	852311	1.12001e+06	813353	930196	812040	775716	1.01927e+06	806630	731975	835105	816393	913373	743141	[70][M]+	[M+H]+ 337.335	100	0	0	-	-	-	-	-
470	M339T43	339.084	0.7153	3861.23	4735.97	5153.78	4771.24	8060.43	4597.28	7921.45	7449.66	6943.06	1554.6	842.3	797.03	2469.46	5277.51	2371.08	2817.44	657.434	685.055	1433.1	1832.68	1717.77	7428.76	8819.91	4587.69	1166.81	3863.59	4257.25	1545.28	982.452	1028.55	1158.52	1012.68	907.869	1244.2	2792.05	1655.39	-	-	3218	1	0	-	-	-	-	-
471	M339T50	339.121	0.830133	1179.28	676.136	1776.83	511.2	805.107	897.507	989.52	1905.98	626.204	606.554	491.284	324.5	396.329	1995.96	670.473	505.827	410.336	316.81	3111.87	3320.02	2919.64	2678.27	2385.75	2493.23	729.542	2449.69	2404.28	1891.92	1272.72	1536.48	1097.29	1144.17	1186.5	2185.09	2978.41	2216.82	-	-	4344	1	0	-	-	-	-	-
472	M339T203	339.192	3.39063	12165.5	10858.2	12212.3	4245.05	4039.27	6219.78	1939.12	1990.38	2943.42	1950.84	1373.94	2039.99	2592.01	2074.76	3450.21	1141.01	1594.05	688.896	2592.91	1415.18	2665.09	3537.61	1048.41	3429.59	1453.5	968.398	1297.85	1821.93	1975.88	2495.79	1782.81	3058.96	2485.51	2083.32	2703.86	2000.04	-	-	3931	1	0	-	-	-	-	-
473	M339T194	339.251	3.23083	3073.94	2821	2795.79	9096.09	9159.58	8380.95	8202.16	8251.52	11454.3	10236.9	8386.69	7901.88	8582.47	7542.59	11682.9	12450.9	3358.9	6224.73	11321	11020.3	11746.6	7644	7747.15	8604.24	14168.3	9317.98	6241.8	8445.01	5568.72	4536.91	6011.81	6357.5	6126.12	8864.2	8242.9	7679.47	[71][M]+	-	464	1	0	-	-	-	-	-
474	M339T284	339.251	4.72941	34143.9	20607	16249.8	12251.5	9735.63	18143.8	32102.6	22059.8	16842.1	25778.2	24132.2	15372.7	11637.7	9467.03	17982	6966.13	22743.5	13683.4	11130.9	12880.1	13851.8	7995.56	10926.9	11993.5	11957.3	12505.8	12023.3	19591.8	20526.2	15868.1	22781.7	10690.1	24800.3	7407.68	25717	21391.5	-	-	3099	1	0	-	-	-	-	-
475	M339T232	339.27	3.86235	19418.3	17642	20253	72283	45023.9	60496.9	53064.8	47101.9	54204.3	51868.8	43995.6	47666.6	45459.1	50824.8	56749.6	43789.3	27227.9	33660.9	47845.5	47917.8	47988.7	52934.4	48989.7	56606.2	34635.4	57009.7	42945.3	37755.7	43051.3	43679.9	40623.1	36400.8	39785	26479.9	24983.6	25898	[69][M+1]+	-	2776	1	0	-	-	-	-	-
476	M339T568	339.29	9.46798	433360	674213	515387	2.15569e+06	1.57966e+06	2.04385e+06	2.12478e+06	2.66227e+06	1.75524e+06	1.95328e+06	4.512e+06	2.34128e+06	1.82964e+06	1.52689e+06	1.2939e+06	1.40903e+06	2.63357e+06	1.84717e+06	2.51795e+06	2.03679e+06	1.50216e+06	1.60752e+06	1.79095e+06	1.12318e+06	1.90991e+06	2.17141e+06	1.55515e+06	3.78069e+06	1.4577e+06	1.22222e+06	1.04516e+06	874994	1.19642e+06	1.70093e+06	1.56346e+06	1.62101e+06	[72][M]+	[M+H-H20]+ 356.294	11	1	0	-	-	-	-	-
477	M339T421	339.29	7.01307	76429.8	75010.2	77543.8	53521.7	152331	74352.3	98481.3	84430.4	59387.6	90682.3	42122.2	28219.4	50223.9	23503.7	79951.6	60909.8	11738.1	27179.1	67747	56086.9	140961	50746.6	37415.2	39649.3	50116.8	52506.3	89185.6	48853.2	93002.5	50127.6	65782.9	39725.1	75561.1	82975.4	35751.3	42693	[66][M+2]+	-	22	1	0	-	-	-	-	-
478	M339T309	339.29	5.15043	180643	199352	156145	430594	280263	338617	359221	413495	454395	390870	377161	351181	430452	352537	421489	464959	333029	257561	324268	395399	396029	425197	421958	489696	404275	341317	399450	316006	306694	249214	220614	234460	231607	212199	227113	272682	[73][M]+	-	2706	1	0	-	-	-	-	-
479	M339T544	339.29	9.07463	218220	266685	239751	290407	381168	494232	128539	156578	76809.5	55116.1	209354	40340.1	163153	24790.6	35335.2	22241.8	43533.7	36541.4	640926	569476	556037	713359	713355	565530	590886	636927	815740	1.034e+06	428249	441399	569735	660081	763846	367325	463871	503715	[74][M]+	-	827	1	0	-	-	-	-	-
480	M339T596	339.29	9.93062	37569.3	42219.7	36446.3	42145.2	77622.6	85347.6	44722.8	72980	55895.3	51368.2	128709	53481.1	38539	45527.3	49973.3	39330.2	71093.2	66678.1	99257.9	95245.4	93676.1	82670.6	90425.6	58965.6	79183.4	84357.4	98525.6	130631	80482.6	56066.8	51258.7	57303.9	65928.1	46659.8	81716.1	80073.1	-	-	2320	1	0	-	-	-	-	-
481	M339T474	339.289	7.90555	143051	98630	120277	159186	220591	395407	73598.9	103672	102597	64965.3	60624.4	62861.3	137454	111163	96365.2	62293.9	72400.7	48406.2	40344.9	84556.1	79268.2	53703.3	35653.6	36206.1	73806.3	36612	34398.9	27321.8	20726.2	15429.3	33381.7	34673.5	35133.5	42922.7	51109.4	60604.4	-	-	180	1	0	-	-	-	-	-
482	M339T451	339.29	7.52108	113905	134840	103179	124640	176084	168767	80509	66249	74667	72796.3	62679.6	65620.1	47719.3	46318.4	62374.2	52880.1	24769.4	23969.3	52367.9	53039.5	69597	61021.2	50010.2	80540.4	79065.1	55154.4	65973.3	63387.4	56044.8	43731.8	34890.1	88607.3	93557.6	38675.2	49599.3	60333.1	-	-	278	1	0	-	-	-	-	-
483	M339T768	339.289	12.8079	17750.7	17302.2	12940.4	10643.8	15713.9	12429.3	19975.1	68416	28877.9	41431.2	110781	59914.2	30580.5	21755.9	44279.8	21283.7	66060.8	26357	16297	12383.2	15686.4	23072.4	24385.5	8341.41	21255.4	26629.1	16791.4	46289.2	19820	22657	12133.8	15207.6	14371.6	48451	28556.8	39975.2	-	-	584	1	0	-	-	-	-	-
484	M339T755	339.29	12.5898	11116.8	13791.7	11446.4	11053.2	14656	12103.9	12870.1	40441.9	14261.5	28118.4	27178.8	29246.4	10006.7	11807.2	10199.3	6668.55	32884.3	12775.7	11386.8	19070.4	15990.2	19535.6	22208	14330.5	21722.2	23925.6	21021.3	45002.4	19482.6	20068.7	18202.4	25653	12420.5	36498.1	25768.5	45836.8	-	-	642	1	0	-	-	-	-	-
485	M339T656	339.29	10.9407	12716.2	11973.9	12289.7	11848.3	13634.1	15969.5	7830.35	26542	7954.29	10695.5	20590.4	11776.1	5734.05	7125.46	9761.59	5196.67	146188	6695.62	10043.5	10907.6	12140.9	14105.6	24317.5	11629.3	10292	10858	11988.7	45542.9	6425.11	5699.23	8267.79	8784.39	8054.24	13693.5	18877.7	13574.9	-	-	2123	1	0	-	-	-	-	-
486	M339T511	339.289	8.5212	26039.1	61545.8	28571.6	30781.2	43846.9	24704.7	26568.1	43287.9	17299.8	16259.8	15795.3	12306.4	9220.81	17915.1	18026.7	10706.7	6343.9	6317.3	9461.73	12243.6	12479.1	9340.37	36982.7	8131.87	10767	10527.4	20398.9	6921.69	7148.76	36127.7	24533.4	5547.86	6090.17	11433.1	8743.25	9455.65	-	-	1772	1	0	-	-	-	-	-
487	M339T386	339.327	6.43457	24514.2	23800	15366.3	186898	156965	174456	116275	88303.6	104480	93287.5	162639	84116.1	75431.4	58580.7	65097	63553.8	73065.1	52615.2	211039	230857	219425	338860	377810	342889	218788	231956	349683	225967	179475	161940	168904	181813	176066	82967.6	120428	146753	[75][M]+	[M+H]+ 338.319	160	1	0	-	-	-	-	-
488	M339T316	339.326	5.26603	1225.17	8820.44	1354.55	18293.9	10391.9	14489.2	13403.9	3780.54	1581.15	2541.14	1968.78	1724.99	2238.7	10390.6	14378.9	2096.42	2247.06	13614	3362.17	3453.61	3241.53	3061.6	3502.42	3338.48	25939.6	22246.6	3550.46	17077.9	2276.4	17047.1	36776.7	42408.7	2178.79	2173.41	2979.88	1871.6	-	-	4059	1	0	-	-	-	-	-
489	M339T370	339.346	6.17002	223074	286252	207759	196858	264138	234944	261056	186602	175159	257772	198904	184065	248000	181118	208381	222963	225677	239318	192573	187272	248138	190006	275624	217460	283597	203920	215530	188835	189031	257580	191030	184218	198136	198570	223901	177492	[70][M+1]+	-	100	0	0	-	-	-	-	-
490	M340T194	340.254	3.23387	1145.58	1196.57	1003.79	2473.11	2445.31	1943.86	2512.11	2516.35	2373.54	2809.77	2121.2	2034.7	2319	1892.95	2797.86	3108.73	1743.96	1600.04	2790.17	2729.11	3090.42	1898.11	1674.96	1877.26	3424.05	3102.38	1906.48	2439.27	1617.59	1335.68	1941.69	1657.63	1470.56	1615.12	2344.8	2219.18	[71][M+1]+	-	464	0	0	-	-	-	-	-
491	M340T107	340.249	1.78673	1919.23	1649.73	1575.98	2446.67	3187.22	2857.01	921.96	545.848	733.251	881.643	822.33	804.118	1053.95	692.933	739.937	892.957	950.335	730.033	1272.99	1376.36	992.01	581.192	886.024	563.072	1079.81	1006.57	667.457	1004.59	1145.81	1765.47	977.372	1895.03	1989.32	906.802	740.334	661.91	-	-	4904	1	0	-	-	-	-	-
492	M340T283	340.254	4.70985	2568.38	2283.34	2172.67	2441.65	4171.57	4321.7	3923.94	3860.61	3506.21	3523.8	5863.01	2699.95	6201.28	2186.85	3797.29	2473.69	2475.31	3013.74	2103.35	4690.57	4338.52	3552.81	2280.28	3870.28	4719.81	2830.39	3579.52	3378.99	3156.85	3608.96	3140	4222.21	3758.51	2536.84	3245.26	3733.81	-	-	4749	0	0	-	-	-	-	-
493	M340T232	340.273	3.86122	3059.93	2791.8	2857.11	11591.4	7139.97	8874.15	7131.3	6374.04	7895.68	7663.88	6150.96	5831.12	6673.84	6614.79	9331.36	6757.37	3719.91	4328.34	6917.3	6217.66	7424.03	8606.12	7278.05	9274.86	4871.59	7616.67	6668.97	5568.99	5638.22	6574.07	6783.59	4538.52	5879.78	3904.31	3904.83	3904.27	[69][M+2]+	-	154	1	0	-	-	-	-	-
494	M340T246	340.283	4.1069	45818.8	43901.1	49012.6	227126	133415	180351	113527	118708	147912	114890	100922	102472	102280	119795	145829	102394	58938.8	62310.1	126432	113336	118433	166286	145888	132034	86402.6	155274	110408	90197.7	114158	100455	96388.7	87541.4	84415	62855.8	50763.1	44295.1	[76][M]+	[M+Na]+ 317.294	165	1	0	-	-	-	-	-
495	M340T422	340.293	7.0286	19091.7	20492.4	10959.6	18370.2	22105.4	21953.1	15307.2	18267.2	31929.3	11704.6	11849.1	9375.7	26178.5	12303.6	11039	16916	5110.63	14528.4	18242.3	36955.5	17966.3	17950.8	14886.9	15672.6	14371.7	6723.28	9568.36	10896.1	11787.6	10524.6	18550.5	14692.6	9902.88	14594.7	18192.2	11004.5	[66][M+3]+	-	22	0	0	-	-	-	-	-
496	M340T450	340.292	7.50474	33056.9	33694.9	27982.6	28474.9	40886	51720.2	23088.4	19218.4	14070.3	23972.8	15346.5	13022.6	14709.5	11214	28709.3	12726.3	8646.21	9545.66	14405.8	18090.5	20484.7	24761	20747	20477.7	25359	15135.5	10374.2	15140.3	19458.2	13018.3	9216.56	8824.99	9078.92	9849.47	11926.1	8005.13	-	-	2397	0	0	-	-	-	-	-
497	M340T474	340.293	7.8928	42268.3	29180.3	36206.3	39996.5	31569.8	20453.3	28897	42297.6	24134.7	23207.8	30712.2	19151.6	18649.1	12507.9	15012	10990.7	8376.58	10686.7	14405.7	18683.2	16860.6	9822.73	16185.3	15813.3	15623.5	13958.4	12127.5	8326.03	10370.2	7746.04	8437.91	6285.91	9074.36	8864.68	11629.3	13085.6	-	-	938	0	0	-	-	-	-	-
498	M340T568	340.293	9.4679	119523	112674	112996	519553	398217	499825	521772	667843	366924	477958	1.04215e+06	504245	461692	399224	315919	328457	640988	437968	628081	471006	371409	382779	405191	297593	433466	545346	405359	869313	336614	299938	234719	225445	312502	414041	352812	389090	[72][M+1]+	-	738	0	0	-	-	-	-	-
499	M340T309	340.293	5.15043	43714.6	54135	41069.2	107938	71686.3	92268.8	89687.4	102552	119787	103501	98422.8	86693.7	106978	86332.4	102593	123999	84418.4	61737.2	82403.7	98522.3	98849.5	114307	105056	116904	92784.4	85515.5	96863.6	78742.8	72572.5	62862.5	56972.5	61048.5	57257.5	51404.9	59930.5	64966.9	[73][M+1]+	-	2705	0	0	-	-	-	-	-
500	M340T544	340.293	9.07473	52929	66264.7	71748	72865.9	99377.1	118664	33605.3	39034.8	8342.98	12742.4	30212	11220.6	1061.02	5801.91	6508.65	4926.12	12112.4	9630.05	168588	143469	137307	174618	177143	134298	146286	163045	197571	248226	113907	113765	139124	172328	186650	99505.5	104690	130101	[74][M+1]+	-	828	0	0	-	-	-	-	-
501	M340T386	340.329	6.43445	7957.61	7876.4	6982.94	46661.3	39199.2	45934.3	27584.4	22388	24006.4	23012.4	41110.2	21514	20399.8	15627	17464	16602.1	17541.9	12767.1	49737.8	53626.5	53318.8	84709.8	90373.2	81630.7	58032.6	56360.1	86171.3	54805	44929.3	41583.7	44638.6	46483.1	43692.3	21218.2	31780.6	36234.5	[75][M+1]+	-	160	0	0	-	-	-	-	-
502	M340T370	340.349	6.17323	31206.5	36718.9	31238.6	28207.4	35123.5	33252.7	34679.5	28021	28014.1	34220.9	31593.1	26337.5	37585	24782.8	26390.2	31572.9	29935.6	35326.6	26512.6	25403.6	33497.7	25285.3	38223.3	27106.2	41342	29265.9	28432.8	24187.9	26668.4	33814.1	25538.2	25580.3	23923.7	30163.7	32345.5	26479.4	[70][M+2]+	-	100	0	0	-	-	-	-	-
503	M340T405	340.358	6.75297	19133.6	24059.3	16923.2	21484.1	29143.4	24232.1	20023.3	17656.6	17305	21932.6	21708	17130.2	25391.5	17032.8	19106	19806.3	17459.9	18390.7	22137.9	22149.2	25435.4	23706	27697.9	22812.4	26254.1	24207.2	19217.8	18808.7	23748.6	26557.7	19767.9	18795.1	17530.4	19235.5	25295	17571.1	[77][M]+	-	44	0	0	-	-	-	-	-
504	M341T48	341.137	0.793417	1420.88	1081.3	1615.58	7720.48	7954.63	933.098	7678.24	1435.63	7176.1	724.612	6929.76	7322.95	7321.94	6228.94	824.382	7452.78	7153.6	7203.88	749.865	1015.38	1038.7	3467.05	3419.51	1470.75	933.348	2286.39	788.563	6922.79	7076.36	631.965	6041.1	640.937	7200.92	1593.4	1491.53	1305.72	-	-	4792	1	0	-	-	-	-	-
505	M341T298	341.185	4.95852	10623.4	10348.2	10432	9167.41	9350.92	9631.07	1719.83	1432.7	2721.25	2165.46	2066.45	1480.74	1022.04	1113.26	1357.06	1401.71	1266.87	1147.38	8380.63	9731.81	8447.33	13393	12119.8	16450.5	7102.41	8958.06	8764.26	7624.53	7482.15	6851.62	8565.76	9664.72	7290.23	4384.44	5702.31	5502.27	-	[M+K]+ 302.222	201	1	0	-	-	-	-	-
506	M341T61	341.194	1.01627	1803.24	1654.94	2205.61	1065.46	2549.62	863.096	1074.69	1213.06	715.693	728.98	1053.99	851.382	850.122	822.9	721.649	721.568	746.305	619.513	2796.33	4995.61	4627.95	1390.11	1697.86	1443.71	3530.57	4258.62	1247.32	2811.82	2184.78	2329.12	1614.97	1267.18	1131.11	1823.3	1819.13	2892.04	-	-	4876	1	0	-	-	-	-	-
507	M341T207	341.207	3.44176	6039.53	5642.07	5375.4	7985.88	6066.01	5691.63	4329.58	7162.92	8512.88	3968.01	4436.64	4555.53	5904.61	5409.8	5195.02	7668.32	3631.97	3807.49	15637.1	13862.2	13857.1	12069.5	9986.33	8248.59	15983.2	16505.3	10174.5	14912.6	13402	11590.9	17783	19878.1	24042.5	10502.3	13178.1	9649.84	[78][M]+	-	2916	1	0	-	-	-	-	-
508	M341T246	341.286	4.10821	10514.9	8865.87	10626.1	48269.1	27554	40351	24331.9	25011.9	31256.2	24654	20961.1	21719.7	22448.7	24897.4	28752	21057.9	11910.8	13244.2	25737.2	25890.1	26973	37241.8	30490	29009.3	19957.1	33785	23852.1	20884.2	23628	22356.4	18856.1	17387.6	16523.9	13981.1	11066.9	10793.6	[76][M+1]+	-	165	0	0	-	-	-	-	-
509	M341T309	341.296	5.15073	9300.32	10808.3	7544.2	17926.8	15631.1	16290.7	16142.2	16210.2	19437.8	18886.7	16260.2	16636.4	16747.3	16546.5	17106.4	20018	14496.8	10172.9	17115.5	17830.9	11957.7	20306.9	17378.1	20032.5	17887.6	10574.6	19130	14098.2	15702	6869.52	8544.34	9563.31	9022.6	9006.7	9031.63	11866.8	[73][M+2]+	-	2704	0	0	-	-	-	-	-
510	M341T570	341.297	9.49698	56882.4	56794.9	40942.1	76270.1	67658.5	80614.9	76507.8	99097.6	55355.6	66763.5	165718	90997.9	69535	54051.7	58186.4	53358	89477.8	74384.1	72013.4	100226	85655.3	87390	91792	64278.2	78504.1	79505.7	129473	196095	119427	66299.5	99150	111846	80905.3	69133.2	90877.2	79219.3	-	-	261	0	0	-	-	-	-	-
511	M341T480	341.305	7.99955	41215.4	47294.7	45770.2	19528.3	33056.3	28966.8	5249.91	13294.4	10219.9	8321.05	5702.61	2215.42	3267.73	5835.39	8766.52	5618.68	3852.29	3902.38	35556.1	36729.1	36903.9	19754.1	25137.5	22023.3	23677.6	42888.3	29883.6	23991.1	14763.2	14339.7	13149	12188.4	15451.1	15586	13254.3	16748.6	-	-	155	1	0	-	-	-	-	-
512	M341T336	341.306	5.59913	18380.4	15936.1	15282.7	13515.6	10903.8	13106.6	10472.6	7643.23	7290.22	12291.4	8867.12	6902.07	11915.4	7145.95	9320.1	11153.9	6670.55	5528.08	7321.31	9252.41	7818.43	8385.15	18239.5	9790.71	8375.18	12516.4	12179.4	7222.72	7493.33	7574.14	15025.6	10479.2	14413.9	16080.3	12211.3	7339.11	[79][M]+	-	2978	1	0	-	-	-	-	-
513	M341T596	341.305	9.92713	23230.6	29968.8	23977.2	31108.5	41211.1	48300.1	39666.1	67331.1	50800.2	52132.6	108685	53435	34124.6	41028.7	47965.5	39597.1	74429.7	67057.5	106935	96861.5	94723.4	73837.7	83862	57507.4	85962.2	86167.7	98330	133189	82353.3	56640.2	51520.6	59221.2	63915.7	59612.6	77536.6	83992.7	[80][M]+	-	116	1	0	-	-	-	-	-
514	M341T456	341.304	7.60361	37475	38012.1	35022.6	13930.6	15418.2	16109	11139.8	6351.01	6277.11	8928.95	8024.16	7686.85	4772.17	8214	8107.56	6117.67	3852	4859.56	10397	14769.8	13143	19114.6	12192.8	11244.7	9301.78	11686.7	3101.95	9891.46	23185	5654.78	11285.6	9783.75	7613.38	7748.25	9252.93	8097.91	-	-	1234	1	0	-	-	-	-	-
515	M341T386	341.332	6.43425	2606.03	2160.56	1683.15	7973.07	5905.77	8673.85	4549.42	3458.86	3536.01	2924.78	5410.84	3585.74	3187.57	2086.53	2601.19	2031.73	1985.77	1974.4	8371.81	7404.4	6783.01	12527.3	12052.2	10548	7860.97	8096.4	11999.4	9131.08	5878.6	6138.91	5493.55	5287.18	5871.75	2376.21	4410.39	4334.37	[75][M+2]+	-	160	0	0	-	-	-	-	-
516	M341T370	341.351	6.17402	3937.48	6152.87	6330.78	3206.59	5066.59	4127.69	4677.91	3114.2	3140.01	3744.73	3009.14	2798.38	4800.64	2639.52	3334.58	2817.57	4169.8	3245.94	3679.7	2013.4	3853.1	3230.24	3840.33	3296.87	5146.04	3542.47	3150.05	3128.67	2514.68	3516	3454.51	4129.23	3240.97	3340.62	3628.62	3211.99	[70][M+3]+	-	100	0	0	-	-	-	-	-
517	M341T405	341.36	6.75297	5344.26	5792.05	4010.28	7181.15	11512.8	6703.24	4536.15	4344.27	4487.03	5536.31	4583.49	4172.64	5666.78	4420.56	4820.79	4360.2	4716.95	5000.29	5892.89	6593.83	7452.84	7911.66	9705.63	6934.95	8250.26	5084.1	6954.1	3630.97	6495	8155.69	5268.76	8011.36	6300.83	5036.64	6992.27	4496.44	[77][M+1]+	-	1223	0	0	-	-	-	-	-
518	M342T207	342.21	3.44788	1471.83	1950.08	1815.74	2149.27	1528.89	1992.35	1180.42	2102.49	2392.46	1110.25	1220.31	1146.34	1744.67	1369.68	1385.44	1903.43	909.286	1158.69	3719.85	3786.63	3864.6	3096.84	2224.96	2269	3612.66	4045.05	2342.48	4036.39	3992.43	3127.62	4912.71	5789.09	6339.07	1491.24	3256.29	2785.28	[78][M+1]+	-	2917	1	0	-	-	-	-	-
519	M342T247	342.289	4.11243	1618.91	1511.49	1628.2	5372.31	4073.27	5886.36	3882.99	3486.89	3807.68	3319.64	2973.16	2952.96	2046.22	3056.63	4097.89	2984.78	1699.26	1741.91	4196.59	4051.35	3410	4325.63	4289.17	4428.13	3324.94	5051.96	3681.43	3412.21	3933.87	2706.6	3532.42	3706.63	3731.42	2216.58	2344.02	1741.9	-	-	4462	0	0	-	-	-	-	-
520	M342T285	342.301	4.74892	41355.9	41891	43591.5	194907	116800	147025	139041	137926	161169	164602	177146	154208	152777	159599	218767	139447	86180	91070.6	132089	132711	127213	101160	90691.4	80593.4	165906	160285	53940.4	117788	175104	158011	148523	153118	160904	87817.5	82493.4	79667.7	[81][M]+	-	204	0	0	-	-	-	-	-
521	M342T596	342.309	9.92713	6915.53	8319.81	6616.86	6387.19	12135.9	14703.5	10164.9	17017.8	14201.9	12587.3	30012	14339.6	8766.85	12704.5	12446.1	10421.2	16394.4	16961.4	26290.9	28724.5	22179.9	17221.7	23346.8	16880	20945.6	22119.9	24129.7	33458.4	19242.2	13402.8	12448.4	14137.8	15865.5	14079	21770.4	20631.3	[80][M+1]+	-	116	0	0	-	-	-	-	-
522	M342T572	342.308	9.53882	15803.7	18218.8	11256.4	13571.1	13137.3	14207.8	12227.5	9720.39	10608.7	10770.9	22730.6	10166	9089.25	9700.26	4246.79	9287.34	13901.1	9796.27	23990.6	20436.4	21528.5	34247.4	26777.7	21057.3	25682.1	24403.6	22991.3	48487.5	22219.3	17393.8	24804	26275.4	24255.4	21315	18565.9	19483.3	-	[M+Na]+ 319.308	226	0	0	-	-	-	-	-
523	M342T336	342.308	5.59827	3634.39	4546.89	3648.34	5068.73	3744.35	4367.72	2707.15	1610.2	2169.44	6600.32	2484.73	1946.6	4083.17	3558.97	4045.58	1702.05	2517.53	1887.69	1781.25	1918.82	2479.24	1944.69	2844.03	5272.51	3855.07	3340.37	2794.26	2128.21	1730.04	3016.21	4800.44	2496.26	3672.43	3879.95	3272.92	2224.73	[79][M+1]+	-	2978	0	0	-	-	-	-	-
524	M342T480	342.308	8.00362	10396.9	12675.8	13065.4	4236.77	9111.16	6679.14	909.444	2662.2	1404.29	3806.82	2210.32	2075.94	2031.05	1324.97	2595.4	871.753	315.82	432.615	9588.96	13296.8	11603.2	7117.05	4794.51	6272.75	6859.68	11946.4	7363.28	5416.66	4495.65	3522.73	4566.55	3600.99	3101.26	5604.74	5327.59	5612.12	-	-	10	0	0	-	-	-	-	-
525	M342T341	342.337	5.68376	3492.32	4041.88	2949.7	3978.07	4094.03	2992.43	5759.95	3631.08	4150.29	5123.76	3621.42	3300.63	4622.18	3017.61	3337.95	3435.59	3361.47	3322.68	4488.23	2440.7	3959.18	4303.87	4945.48	3764.82	4734.2	4640.91	4044.72	2475.99	3158.63	4200.81	4625.61	4590.77	4376.65	4197.9	4881.82	2726.58	-	-	4322	0	0	-	-	-	-	-
526	M342T264	342.337	4.40292	71206.7	77151.4	72681.6	76564.3	69187	86707.6	29446.7	29366.3	28492.3	18872.5	21908.6	15872.5	16099.5	19601.8	24620.9	14812.7	13761	14766.4	38127.2	42495.2	38869.7	84956.3	104651	119958	56711.7	49356	36242.5	51249.4	46589.7	49201.1	52874.1	52919.3	54093	29373.2	14812.9	26973.1	[82][M]+	-	273	0	0	-	-	-	-	-
527	M343T40	343.124	0.672417	2170.75	2933.82	3240.84	1031.01	3844.56	1439.46	47576.8	69105	56755.5	3325.01	2648.53	1635.82	9190.18	30218.3	12500.6	19188.1	859.141	930.299	2412.48	2644.72	2819.65	84877.4	87314.6	19400.8	5541.91	17289.9	27475	2526.49	2231.22	2320.91	2369.58	2112.67	2110.64	10915.4	35140.9	12417	[83][M]+	[M+Na]+ 320.128 [M+H]+ 342.117	127	1	0	-	-	-	-	-
528	M343T318	343.201	5.3082	2825.05	2898.76	2602.93	6258.72	3449.22	5258.78	8978.75	8008	8489.14	7789.71	9375.7	7927.83	7197.4	7526.4	7411.33	6843.8	7232.01	7746.54	7481.68	7479.33	6372.13	6787.7	7111.94	8565.34	5131.81	7426	8988.43	4837.89	6397.59	6067.5	3090.12	3614.71	5272.4	4570.77	5584.67	5046.22	[84][M]+	-	3523	1	0	-	-	-	-	-
529	M343T250	343.223	4.16213	1308.03	1600.71	1726.7	2200.81	1972.95	2910.38	2470.3	2211.5	2770.67	1623.19	2247.59	2569.14	2568.76	1941.54	2057.46	2644.68	1364.63	1031.85	2898.56	2010.34	2550.26	2140.36	2495.82	1682.64	3676.01	2532.34	2176.49	2601.18	2620.53	3323.09	2711.25	2949.76	4377.53	2763.6	3429.17	3366.88	-	-	4065	1	0	-	-	-	-	-
530	M343T313	343.284	5.20847	14828.5	13895.8	15456.9	12514.9	17138.5	9715.71	10389.4	11660.9	7161.7	27214.8	6204.62	16555.4	28996.4	18847.6	11810.1	18438	10393.7	21818.5	13357.5	4571.6	15486.4	16318.5	11055.7	15231.1	15338.4	16010.4	27474.4	12926.3	14661	16003.5	15993.4	11682.9	13527.6	13215.9	15619	12909.7	-	-	4692	0	0	-	-	-	-	-
531	M343T297	343.285	4.94537	11423.6	13189.3	7394.57	7605.89	8064.33	8749.75	5295.1	4901.37	3401.91	5840.37	5728.5	5247.64	6649.66	5936.96	4985.78	6824.1	4239.74	4824.13	8826.85	7163.17	11649.2	7189.52	9859.72	6441.8	7481.36	7354.77	6422.12	8398.72	6421.15	7719.77	5883.81	4039.93	6064.88	8254.78	6867.71	7610.62	-	-	3275	0	0	-	-	-	-	-
532	M343T285	343.304	4.75038	12074.9	10099.6	10924.4	47538.2	27184.3	34737.6	34462.1	29320.2	38439.4	41156.2	39196.2	36310.1	34538.8	37828.7	48317.2	32131.5	19581.1	20625.8	32529.7	29420.6	29717	22746.2	20704.7	20269.4	41659.6	36479	12735.3	29077.8	42344.1	37827.6	36478.2	35116.3	39230.6	20443	18326.7	19778	[81][M+1]+	-	204	0	0	-	-	-	-	-
533	M343T359	343.3	5.97509	2705.48	3781.96	2682.92	2657.37	2800.49	1604.78	3357.41	2182.86	2678.69	4633.58	2895.09	1651.02	3612.21	1831.68	1982.03	2973.83	1865.85	2423.95	2294.92	3127.86	3441.21	2085.88	1987.8	2512.96	2899.87	2529.64	2942.67	2949.28	2157.83	2763.14	2180.76	2897.49	3113.75	2020.18	2874.6	2342.97	-	-	3512	0	0	-	-	-	-	-
534	M343T595	343.311	9.92499	2807.46	1053.79	2115.27	2414.02	2405.12	2003.4	1980.09	3025.82	2521.03	2917.91	5138.33	2391.22	1736.72	1958.13	2065.38	1216.84	3047.87	3207.78	4918.01	6303.88	2886.23	3648.44	3328.44	2050.5	3720.08	4621.53	4441.59	5417.15	3849.15	2880.73	2826.44	2626.7	3125	3175.46	3748.02	4243.22	[80][M+2]+	-	2321	0	0	-	-	-	-	-
535	M343T264	343.34	4.4035	18240	17678.4	19171.1	20931.3	18319.1	22400.7	8708.01	8991.7	8125.59	5702.37	6364.75	5718.79	7082.25	4298.63	4297.51	4167.04	3896.81	5326.3	12152.2	14512.9	11878.2	21467.7	27970.3	33751.3	16966.8	13390.8	14121.7	14423.2	12315.6	16983.5	13948	11678.6	16259.8	8877.12	3965.41	8572.31	[82][M+1]+	-	273	0	0	-	-	-	-	-
536	M344T41	344.127	0.684592	1114.81	907.74	1375.33	686.074	1070.74	857.71	7731.28	11799.8	10935	520.671	492.202	376.299	1210.4	5223.93	3119.02	4135.61	259.158	320.214	562.657	407.092	675.002	13347.9	14370.8	2936.67	1279.78	2961.01	4940.87	754.091	398.645	397.415	570.863	691.099	628.761	1526.29	5912.39	2026.03	[83][M+1]+	-	127	1	0	-	-	-	-	-
537	M344T318	344.205	5.30763	1035.48	1209.41	912.528	1503.63	1484.04	1542	2274.48	2811.6	1509.64	2023.11	1253.51	2065.81	1900.85	1504.08	1428.11	2038.01	1928.07	1488.12	1678.39	2459.55	2547.11	1718.56	2451.25	2817.31	2375.31	1846.05	2308.7	1214.95	1722.47	1276.39	1864.76	1863.74	2165.41	1321.64	745.887	1428.43	[84][M+1]+	-	3530	0	0	-	-	-	-	-
538	M344T43	344.228	0.715633	3130.14	3255.19	3425.28	1420.74	1804.8	1506.68	1867.01	1517.88	2156.93	1466.35	1525.69	1066.07	1794.58	1636.94	2029.38	1098.69	1195.11	1276.54	1221.93	887.712	1641.05	2219.36	1555.65	1384.79	840.746	1671.95	1891.52	1803.44	1547.81	3226.75	1390.5	1299.57	1616.21	1313.12	1555.37	1595.67	-	-	3219	0	0	-	-	-	-	-
539	M344T261	344.256	4.3504	51319.9	46546.4	47067.9	17626.7	15143.4	23836.5	2078.24	978.662	2554.87	2385.2	2202.12	1667.01	1477.55	3118.55	1727.97	1307.07	1789.93	1133.05	2664.06	3642.61	2896.33	6560.46	3690.23	6996.43	3757.39	2567.81	4386.84	2434.17	2391.42	4132.45	2854.19	3343.04	2865.91	2201.95	1490.86	1818.67	-	-	297	1	0	-	-	-	-	-
540	M344T205	344.279	3.41155	2385.73	3829.71	2303.02	3261.8	3033.82	4011.99	4001.3	6129.11	2266.94	3416.73	2168.04	2825.15	3848.45	2334.46	2594.5	2800.55	2444.62	2390.08	3884.82	4263.96	3590.26	3370.89	4086.04	2967.25	4501.85	3940.19	3327.01	5072.6	3123.8	3733.58	2882.37	3797.27	3415.8	2934.61	4973.98	2902.6	-	-	4755	0	0	-	-	-	-	-
541	M344T299	344.316	4.99012	25793.1	24890.9	26465.2	114556	72684.1	105380	58612.8	61314.2	73518.1	65180.9	53179.1	60557.7	51851.2	62684.1	81283.3	51436.1	29927.4	31541.3	59721.2	63828.8	63399.3	58349	48306.3	46419.9	78212.4	93810.2	30855.2	65111.7	82014.1	65984.8	60995.1	61134.7	54278	40262.8	28654.9	33590.6	[85][M]+	-	268	1	0	-	-	-	-	-
542	M344T264	344.342	4.40293	2312.24	2806.77	3236.2	2434.87	3013.21	3433.91	3105.34	1164.04	3204.76	2797.77	2654.76	695.383	2543.44	3319.97	2156.32	692.998	688.453	1573.71	2037.25	4080.97	3850.14	2761.27	4801.59	4834.6	2924.46	4272.47	5060.9	3154.89	2316.15	2420.48	2060.62	1542.64	1221.21	1263.08	1921	2765.89	[82][M+2]+	-	273	0	0	-	-	-	-	-
543	M345T1000	345.168	16.674	3415.94	4577.54	3695.4	3260.78	3113.55	3474.57	3595.22	810.72	3878.09	3382.59	4449.26	3327.18	3856.03	3687.97	6176.01	3650.57	3871.18	3568.81	4363.83	4092.24	4027.58	3788	4073.26	4023	3222.76	4847.75	4164.13	4088.17	3745.47	1751.28	2956.85	4561.7	4797.9	3034.1	3199.56	3910.76	-	-	4832	1	0	-	-	-	-	-
544	M345T43	345.196	0.7175	8605.72	979.416	9279.54	1046.76	3104.38	685.419	2250.66	1438.36	1689.28	1596.6	811.262	1632.39	1683.63	1181.01	1882.6	2039.82	1104	1201.62	2032.43	1594.91	1369.43	1822.14	2710.09	2341.48	1633.89	1959.07	1379.63	1215.32	1257.26	1020.91	1102.34	1101.01	1448.02	1832.98	1903.3	1851.86	-	-	3224	1	0	-	-	-	-	-
545	M345T302	345.196	5.02618	2447.12	2133.82	2362.87	2693.02	1739.82	1858.51	2925.89	2329.77	1131.86	2127.97	2007.91	2685.91	3431.4	2789.75	800.6	2073.13	2763.96	2770.62	2239.8	2916.86	1528.07	1867.88	3038.4	1749.3	2597.92	1693.65	1919.08	1359.36	1471.95	1139.18	3255.33	2599.47	2701.24	2043.46	1696.32	1934.78	-	-	4677	1	0	-	-	-	-	-
546	M345T196	345.206	3.2601	1041.5	1189.1	715.646	4778.95	6534.13	11740.7	2347.21	1774.7	2077.6	1991.59	1872.64	1619.61	1512.63	1170.11	1035.74	1097.75	831.743	1068.95	2283.44	2497.16	2301.52	1912.85	2566.8	1794.17	1916.85	2922.6	2455.83	2083.06	2646.15	1831.59	2417.43	2822.44	3063.6	2011.52	2377.93	1887.84	-	-	450	1	0	-	-	-	-	-
547	M345T316	345.3	5.26135	10189.9	12360.1	6374.87	7122.75	6260.04	6728.51	7530.72	8927.92	3444.95	4352.98	5805.01	4534.89	9680.43	6366.31	6326.35	6995.84	2180.44	4769.09	6470.06	4186.89	6158.01	4568.39	6519.95	4676.73	3607.39	5941.25	3757.81	4557.18	7710.17	5524.88	8180.07	5270	2317.91	5477.15	6762.57	3214.67	-	-	4048	0	0	-	-	-	-	-
548	M345T299	345.32	4.9914	6087.87	6995.87	7129.2	31207.9	15797.5	22341.1	13910.3	13312.2	18019.4	14019.5	14101	14363.2	13286.6	13813.2	18271.4	12876.2	7456.89	7804.48	13862.4	16754.6	15652.4	14501.5	13414.4	13675.9	18711.9	23450.7	5681.51	15860.4	17654.5	15851.7	14172.8	14970.4	14735.3	10789.8	8937.31	9600.18	[85][M+1]+	-	268	0	0	-	-	-	-	-
549	M346T53	346.223	0.884192	800.994	1549.09	1346.7	666.805	797.077	1152.77	931.512	3099.65	675.853	1555.14	734.82	1221	698.948	848.954	1257.51	574.87	612.871	510.074	3757.86	3549.66	4136.81	686.022	654.995	501.216	2208.07	2437.32	572.752	4376.45	2973.22	2122.48	1810.87	1415.29	1994.49	5974.31	2875.34	5527.54	-	-	4863	0	0	-	-	-	-	-
550	M346T281	346.272	4.67577	189897	173510	193321	125311	105982	156683	19604.3	15936.3	21196.1	17324.7	15540.7	10822.6	8341.85	14323.2	12264.7	7406.23	4162.87	8643.99	83035.5	86273.7	84169.5	155823	180379	264307	97184.6	77011.1	128838	95302.1	38217.9	68283.8	62115.1	65921.1	72578.8	42610.8	26651.5	44759.7	[86][M]+	[M+Na]+ 323.283	142	1	0	-	-	-	-	-
551	M346T299	346.322	4.98947	1419.94	2168.72	1348.04	4527.46	2474.09	4586.4	1863.12	2717.48	4335.92	2964.18	2792.92	2263.36	2180.95	2369.06	3167.14	1918.59	1379.17	1383.38	2110.16	2787.06	3486.86	2938.01	2621.04	2436.34	3302.6	3948.58	2045.69	2758.51	3348.7	2606.98	2697.45	2902.89	2556.68	2879.05	2335.96	2238.35	[85][M+2]+	-	3861	0	0	-	-	-	-	-
552	M346T278	346.331	4.63907	4289.76	173300	192519	4311.69	6600.26	4361.72	3171.99	3590.17	22718	5920.14	1468.18	6724.46	5893.23	5708.14	6783.53	6086.25	3440.03	5941.21	4320.24	87550.3	3107.32	4362.31	770.868	3447.18	5864.64	6105.76	3150.11	96041.6	2213.11	68922.2	3472.18	3659.44	74929.8	42408.7	27619.9	44270.5	-	-	3388	1	0	-	-	-	-	-
553	M347T281	347.275	4.6764	48689.9	46430.7	50099	30551.6	24092.6	36645.5	5094.78	4861.11	6673.46	4052.75	3964.03	3409	1471.93	4459	2831.4	2605.28	1060.02	3129.59	22534.3	22287	24685.2	37310.5	39655	64833.2	23792.3	20606.1	35712.2	24796.8	10367.8	17013.8	18141.1	15977.3	16378	9785.98	5668.8	11781.4	[86][M+1]+	-	142	0	0	-	-	-	-	-
554	M347T311	347.295	5.17874	29638.7	29595.8	34505.3	38986.8	30184.9	32041.2	5121.53	6421.58	8393.51	13029.3	7415.62	3705.2	7602.23	3516.55	7717.65	8330.48	3256.64	3028.4	9814.23	7961.56	9833.89	14647.9	12832.6	11977.3	8763.8	14726.6	8519.57	2971.81	7962.35	6559.92	7985.78	6603.02	11345.2	3490.09	3220.02	3405.72	-	-	1444	1	0	-	-	-	-	-
555	M347T302	347.316	5.03276	6721.17	11184.9	8632.59	11685.4	11952.9	8185.94	12933.6	12425.1	11371.5	15276.9	10614.6	8521.81	16495.1	13386.7	11694.3	10833.8	8605.14	7680.77	7735.45	10886.3	15045.9	9779.61	16245.7	13409.8	12894.3	8965.9	13819.9	10033.6	9513.45	13923.4	9047.12	8990.75	9579.24	8553.48	6281.04	11039.9	-	-	4667	1	0	-	-	-	-	-
556	M348T62	348.275	1.03365	33181.9	33207.3	32697.7	11638.5	19094.2	18991.9	903.966	911.036	1084.57	632.434	427.445	460.154	595.698	850.891	1385.07	923.655	313.113	657.324	1546.62	1576.66	1381.45	1805.73	1748.47	1795.86	1605.11	1584.3	1130.55	1447.39	837.914	904.74	1434.78	1417.19	1085.47	1224.89	1081.9	965.616	-	-	341	1	0	-	-	-	-	-
557	M348T281	348.278	4.67719	8289.24	6624.9	7906.42	3852.22	4883.79	5753.19	1861.53	1504.28	1692.04	1723.53	1629.66	1043.42	1654.52	1744.34	1638.18	1313.29	1416.52	1084.73	3535.6	3399.85	4226.4	7202.44	6012.14	8202.12	4111.35	3320.28	5492.64	3385.97	2069.17	2578.18	2795.19	3475.62	3285.33	2707.86	2220.82	2332	[86][M+2]+	-	142	0	0	-	-	-	-	-
558	M348T300	348.288	5.00806	72924.3	63869.9	64304	209920	77146.8	116134	139609	186081	139064	165037	131167	139949	62915.3	78787	101055	71681.8	83059.2	114747	170245	189557	200080	303131	297029	357954	212731	199737	262177	164519	122682	117322	79707.8	77868.5	81168.6	74573.7	69143.3	98315.3	[87][M]+	[M+Na]+ 325.299	92	1	0	-	-	-	-	-
559	M348T306	348.312	5.09413	28897.3	28711	24792.1	15146.7	19491.6	18376.4	4495.41	2942.14	3979.81	3021.53	5344.56	2877.74	2504.13	4294.77	4613.02	4115.83	3635.24	3925.08	5152.74	6212.62	4398.2	8133.85	5063.8	6575.8	6894.45	5335.41	6452.8	5183.25	4442.39	5882.83	7071.56	7462.77	7335.24	5416.64	4175.89	4429.08	-	-	3191	0	0	-	-	-	-	-
560	M349T204	349.235	3.40825	14530.5	4776.73	7295.75	4368.36	4169.03	4147.64	3724.52	7759.39	3671.03	4488.84	3275.79	4255.24	2502.16	4585.34	4419.19	2360.71	4831.65	2768.23	6477.88	7288.89	6631.22	6053.71	6745.8	7059.21	5319.82	7761.91	6302.63	12061.4	11510.1	8182.06	6006.34	5866.49	8614.38	8628.92	14261.2	6688.88	-	[M+Na]+ 326.248	453	0	0	-	-	-	-	-
561	M349T301	349.291	5.01138	18541.4	16129	16373.6	51706.5	18731.7	29607.6	35884.2	41110.8	35735.9	35625.2	31343.5	34006.8	13688.4	18169.8	22587.9	17279.7	18635.4	27297.2	42276	39287.5	51471.1	73369.6	72222.2	82350.1	56351.3	47522.8	60755.8	39060	28106.7	30979.4	19762.7	18782.2	21998.2	18154.5	17494.6	21104.9	[87][M+1]+	-	92	0	0	-	-	-	-	-
562	M349T305	349.314	5.09077	9041.12	6940.49	7253.73	5591.09	6329.38	5331.77	4310.61	1328.05	1272.16	10115.8	1368.03	2075.32	2808.58	1819.99	1220.47	723.394	2799.58	5139.68	6030.99	10099.9	2840.12	2406.14	2637.35	21039.6	13105.8	1979.85	5681.87	7974.98	1926.49	6940.93	2399.31	5979.79	2449.79	1729.15	4825.32	1034.82	-	-	3768	0	0	-	-	-	-	-
563	M349T428	349.348	7.14106	445.102	1782.53	2223.12	6139.39	3566.25	6316.89	7599.47	9400.6	7045.85	9265.28	15838.8	8593.77	5930.45	6413.17	6668.73	7150.95	8050.34	4575.97	13419.2	12453.2	13834.1	15037.7	16395.4	16983.5	4631.57	11582.5	16277.2	15157.1	10874	9284.22	10889.7	7228.7	8416.9	6469.86	7468.21	7191.14	-	-	887	0	0	-	-	-	-	-
564	M350T43	350.244	0.714433	3043.75	2495.56	1997.23	3177.42	3348.37	2701.53	5895.98	11427.5	11825.4	3888.64	1462.3	1203.04	7534.82	9415.73	4950.86	6480.31	1293.73	2636.39	7193.66	6832.5	7242.7	16960.1	11526	4761.71	6387.78	9064.4	7425.27	3869.14	5296.48	2817.32	5203.35	4935.94	5779.66	8301.85	7689.42	6536.15	[88][M]+	-	3221	0	0	-	-	-	-	-
565	M350T204	350.238	3.40322	3782.76	4158.83	2196.9	1187.8	1247.69	1018.74	1002.38	1660.88	1291.75	1697.36	868.521	1972.03	1070.18	1997.94	1160.99	924.472	914.631	746.317	2072.55	1758	1743.39	1519.13	1928.8	2117.44	1226.79	2174.66	2792.98	2861.56	2048.96	1806.56	1666.1	1383.14	1351.77	2267.18	2810.23	1766.16	-	-	4582	0	0	-	-	-	-	-
566	M350T301	350.294	5.01532	2429.57	2302.71	2070.03	6224.49	3122.89	4349.96	4168.1	5959.34	5589.16	5150.6	5376.56	4392.36	1923.58	2845.55	3311.22	2076.58	3283.93	5458.41	6778.83	5479.25	7560.86	10466.6	10357.3	14555.1	8087.37	7422.77	9785.68	6253.75	3892.59	3793.68	3760.84	4212.57	2986.57	2055.68	3214.96	3149.21	[87][M+2]+	-	1972	0	0	-	-	-	-	-
567	M350T324	350.303	5.39448	17027.5	17717.1	19408.4	44397.1	19286.2	21219.6	49261.5	19024.6	24904.2	53493	31310.8	24063.8	39859	20092.3	23685.7	18706.3	26004.7	17371.2	6614.93	8661.68	9000.02	8250.21	9439.42	9027.08	6869.58	25865.7	47781.7	6715.87	5613.03	6610.72	48728.2	44752.2	46682.9	63362.8	6778.6	14126.3	[89][M]+	[M+Na]+ 327.314	276	1	0	-	-	-	-	-
568	M350T281	350.327	4.67957	5641.12	6054.37	3443.43	4431.74	11654.2	3406.87	12329	5047.29	4648.8	10013.8	5051.51	10206.1	6856.71	7991.36	4411.01	6203.5	3605.13	5633.33	5537.62	5827.12	5953.14	5447.75	7142.31	4829.73	8070.79	10196.6	4929.96	4828.48	7245.72	5876.52	6514.63	4136.85	7654.7	4653.12	7551.26	3696.96	-	-	2621	0	0	-	-	-	-	-
569	M350T428	350.35	7.13593	0	0	444.706	2679.77	891.962	902.506	1904.43	3252.01	2090.53	2950.17	3798.42	4924.56	1878.29	2059.06	1385.95	3144.64	2245.05	1145.88	3832.07	3566.02	4729.32	4957.59	7061.9	7323.61	2855.62	4057.03	3722.1	1519.55	3482.69	3274.58	2807.44	3267.98	3868.8	2370.95	1986.91	2171.39	-	-	888	0	0	-	-	-	-	-
570	M351T44	351.1	0.7285	1556.23	1097.37	1458.94	2278.71	1506.47	1691.06	3551.16	1457.38	2663.85	3209.09	2048.05	1216.2	3074.83	2530.43	2794.82	1749.87	1277.67	1065.56	1682.15	1907.53	2439.3	2774.99	4545.67	1492.54	1959.48	3192.11	2174.1	1853.36	1773.8	1598.46	1895.55	1415.45	1639.5	2284.72	3437.04	1126.19	-	-	4575	1	0	-	-	-	-	-
571	M351T243	351.123	4.04698	613.144	464.732	429.935	723.07	794.691	708.097	748.706	1887.54	1204.24	1376.13	2798.45	2280.98	4538.29	1471.02	1865.31	2355.18	4180.44	1470.54	909.009	1924.19	953.723	1270.61	961.34	533.77	1413.14	939.655	1210.17	888.489	978.459	1107.42	1028.26	1128.63	1040.26	3327.03	2751.07	2408.34	-	-	4453	1	0	-	-	-	-	-
572	M351T222	351.123	3.70676	1615.8	1740.1	1504.19	2013.3	1356.24	1800.8	3782.41	3164.94	2246.88	1414.52	3476.54	1145.21	1560.17	828.454	3302.65	2110.25	1622.95	1800.39	2029.46	1189.12	2739.55	1496.31	1910.51	2163.54	1431.79	1269.11	1251.36	2099.21	2194.34	1724.37	998.296	873.178	1158.45	1754.68	1686.52	1032.83	-	-	540	1	0	-	-	-	-	-
573	M351T62	351.215	1.03807	57850.1	63497.3	62600.4	19748.3	44257.1	31182.5	1773.78	2472.13	5465.99	4258.07	3038.73	3211.57	3122.87	2526.23	5946.92	3555.8	1636.27	3026.27	2919.38	2948.47	3380.83	3533.21	5013.19	5070.15	5609.25	3676.01	4694.79	2930.4	4271.75	2755.13	5551.39	3248.7	5866.95	5133.38	2547.62	4241	-	-	4306	1	0	-	-	-	-	-
574	M351T303	351.23	5.05127	4599.52	2736.26	4058.78	5609	3084.73	3559.41	3836.76	3634.61	3019.48	5792.77	3629.74	3117.8	3416.14	4322.18	4442.48	4311.94	3779.78	4661.69	5472.78	2433.77	2510.17	2988.36	1787.68	5658	4533.77	3531.3	4933.27	2706.72	3045.82	3195.36	2883.06	2640.21	3334.05	3004	4501.14	4397.41	-	-	4664	1	0	-	-	-	-	-
575	M351T43	351.247	0.714975	2179.22	1724	1653.9	1069.59	1328.11	672.813	2523.38	3085.74	3725.18	1398.25	673.19	709.268	2512.3	3028.45	1438.86	1863.9	805.079	923.322	1758.49	1615.72	1574.38	3478.39	3134.29	1297.74	1458.37	2257	1525.73	1303.49	1693.11	903.795	1409.6	1166.22	1394.45	2201.71	2367.29	1735.85	[88][M+1]+	-	3220	0	0	-	-	-	-	-
576	M351T282	351.251	4.69492	67600	68763.6	72236.3	36519.4	50074.2	39668.6	33189.7	27227.4	28788.2	37671.5	27393.1	28031.3	37196.2	32965.7	33508.5	42359.2	35604.6	37602.7	19522.3	36656.7	22134.9	25171.5	12840.1	17400.5	13545.1	21085.6	20345.1	28199.8	34025.9	30981.4	25564.3	31484.6	24379.3	25143.2	35236.4	45092.8	-	-	4301	1	0	-	-	-	-	-
577	M351T208	351.253	3.46695	105945	108163	101484	59254.5	90888.3	64092.8	13171.8	26551.4	24384.7	19251.7	18065.9	17871	18976.7	13787.4	20575	21263.3	10081.5	9552.09	61412.5	59862.4	64497	64886.2	61109	59483.8	79577.9	88486.2	57060	126692	99379.9	90294.9	111226	112967	126008	87531.9	87592	77458.7	[90][M]+	[M+H-H20]+ 368.258	283	1	0	-	-	-	-	-
578	M351T149	351.253	2.47982	1587.79	2121.88	1723.21	2373.48	2750.83	1861.4	983.824	2868.42	2881.25	2053.46	5794.53	5279.16	1620.76	1240.27	2278.73	2948.53	2112.55	1455.99	3051.37	2970.58	2942.35	5390.57	4285.98	8778.44	10065.1	6156.06	5814.82	16819.7	12365.9	18112.3	24573.2	15643.4	14747.7	9734.26	9761.42	8834.56	-	-	487	1	0	-	-	-	-	-
579	M351T67	351.252	1.11203	25841.4	27558.9	14728.7	1401.15	1502.36	1697.4	575.663	776.623	2076.52	748.966	444.629	1125.83	720.348	1997.56	647.312	781.805	1222.12	1300.81	1567.27	1346.58	2434.77	2359.61	1123.6	1454.71	2286.11	1447.02	1103.32	1354.01	2333.21	1243.46	1313.5	2955.42	3174.87	1398.97	1427.8	1056.4	-	-	4426	1	0	-	-	-	-	-
580	M351T120	351.254	2.00113	1071.33	1208.12	1290.49	1852.47	1324.66	1225.1	1164.73	1678.1	2273.76	2067.29	1575.39	1354.96	1649.11	1498.77	582.938	1145.54	1285.41	840.823	11730.9	12232.2	12173.5	11338.5	5369.93	3891.34	11461.9	9163.35	7269.12	11251.9	10417.5	13700	13579.7	17553.7	16788.2	14236.3	11065.2	12780.8	-	-	404	1	0	-	-	-	-	-
581	M351T372	351.253	6.20728	7430.28	7813.02	8893.96	6258.16	8434.43	6401.77	6930.88	7414.7	12504.4	5259.3	5346.92	4056.71	5253.24	4729.52	6095.72	5522.06	4099.23	5276.35	14325.8	7352.16	9243.06	8622.3	8948.05	9345.79	12940.9	10135.5	7629.41	13402.1	9049.15	7150.71	12633.6	31338.5	25125.7	9208.69	10801.2	6926.09	-	-	431	1	0	-	-	-	-	-
582	M351T324	351.306	5.39472	3546.91	3513.22	4199.72	9226.34	4580.5	4201.99	11262.5	4465.77	5698.38	12126.5	7715.12	6207.94	9607.74	4186.3	5178.73	4754.33	6764.67	4264.79	1534.57	2167.81	2472.83	1990.49	1868.21	2771.13	2268.97	5822.38	11904.3	1858.98	1462.72	1939.33	11813.5	10869.2	10651	13739.7	1652.63	3600.91	[89][M+1]+	-	276	0	0	-	-	-	-	-
583	M352T63	352.218	1.04697	12784.9	13166.9	14556.2	4533.65	5570.18	7861.7	1557.52	826.511	1022.76	1680.34	964.298	802.766	1709.61	999.443	809.711	1674.89	878.428	964.334	936.596	998.339	1102.72	1626.37	1686.08	811.026	470.554	1881.09	1087.4	745.083	1017.93	2022.05	1119.43	994.705	849.271	886.315	1831.82	994.119	-	-	4226	0	0	-	-	-	-	-
584	M352T208	352.257	3.46237	28111.9	27597.5	26869.2	18223.6	17513.5	16236.8	4974.61	6449.41	6857.31	5294.9	4147.82	5817.42	5752.86	4296.03	5948.19	6204.87	3602.81	2736.56	18365	17765.3	17015	16284.1	14306.8	15633.5	20271.7	22367.3	17985.7	33156.7	22588.7	22334	27773.7	31972.6	32682.2	20030.9	23806.9	19854.3	[90][M+1]+	-	3954	1	0	-	-	-	-	-
585	M352T281	352.254	4.67975	17423.9	16260.9	19294.9	9307.5	10871.7	9930.06	8608.68	10543.1	6439.82	7631.05	4060.83	7164	8396.1	9196.01	8736.65	6665.08	8486.07	6680.93	6227.56	4324.99	5587.54	12163.6	5287.43	5465.71	13531.7	5238.53	8134.73	4466.17	4589.86	7710.92	4820.98	11554.9	6658.38	4148.21	6918.64	11597.7	-	-	2622	1	0	-	-	-	-	-
586	M352T302	352.298	5.03357	3157.11	5113.08	3119.99	3358.85	1931.78	4544.2	2319.22	5155.24	3378.03	4595.51	3081.46	2992.52	4787.75	1909.71	4744.58	3295.86	3286.26	3912.08	3105.44	3683.94	3389.08	3457.37	1827.91	5273.89	4397.87	2538.76	4832.42	4077.95	4317.54	2503.22	4257.92	4902.97	2805.26	3009.08	4802.08	3530	-	-	4668	0	0	-	-	-	-	-
587	M352T277	352.321	4.61792	16023	20642.8	15896.9	16498.2	25383.8	15974	14455	6136.71	11444	10149.4	12768.8	12403.5	12246.3	9356.44	13797.2	11311.4	14808.4	12563	14659	11356.4	10336.1	13643.3	21064.8	11978.9	6868.64	12147	12553.4	21627.6	10129.6	17891.4	15281.4	12717.7	12522.4	12831.5	10726.5	12351.7	-	-	3029	1	0	-	-	-	-	-
588	M352T389	352.357	6.47872	1334.12	2663.77	3360.84	1100.5	1732.64	1277.45	1378.6	751.354	753.928	985.924	1072.7	908.86	1479.68	833.112	1255.43	1078.02	935.677	1029.12	851.73	714.598	998.531	1083.28	1280.5	1068.8	1456.18	1170.09	1199.21	1173.51	831.737	1454.21	736.821	918.922	1024.97	1244.5	1331.61	773.339	-	-	1325	0	0	-	-	-	-	-
589	M353T267	353.121	4.44973	9727.29	3531.02	10944.5	3485.42	8037.92	9580.22	7796.18	4423.44	4899.43	10365	6262.87	20756.5	4089.23	5997.33	4800.98	3666.54	9685.05	14458.8	10236.8	5853.38	9756.69	10701.1	18242.4	9060.65	6225.08	10586	9240.21	10044.3	2536.52	9065.27	7899.43	4921.87	6177.25	11682.3	9266.74	8048.85	-	-	4457	1	0	-	-	-	-	-
590	M353T64	353.23	1.06539	72951.7	75858.1	73957.5	53751.7	68160.9	81593.4	5804.86	6150.01	7418.15	4996.64	4196.03	3839.55	5034.3	5772.9	11202	8048.19	2928.5	7435.27	10750.8	10742.8	10285.7	13638.3	11735.9	13885.9	11484.7	12528.7	6983.87	10424.6	7093.69	6366.33	10467	10815.7	10779.7	11130.1	7621.85	8167.67	[91][M]+	[M+Na]+ 330.242	319	1	0	-	-	-	-	-
591	M353T305	353.267	5.07747	657555	647791	594769	366643	516465	452363	176622	114758	131481	118762	126014	128609	127095	115243	142698	111989	96150.4	100550	161203	167633	187104	180353	153596	203310	180798	189581	170658	172261	164130	159146	229226	233323	203737	179364	136053	126795	[92][M]+	[M+Na]+ 330.278	132	1	0	-	-	-	-	-
592	M353T458	353.268	7.63033	4933.95	6869.93	7626.41	22042.2	17213.6	15777.4	8458.97	6004.35	8316.48	3312.58	5985.92	6098.4	3123.32	3717.58	5203.68	3406.72	4649.02	6184.72	30360.9	28724.4	20231.2	36965.6	21230.6	14189.9	35990.7	65482.8	13203.2	18510.5	17815.7	18219	21505.6	22785.7	17018.7	14848.5	14843.4	29530.8	-	-	2023	1	0	-	-	-	-	-
593	M353T250	353.267	4.1585	19474.3	22004	15150.6	9469.7	14929.6	9532.13	28861.5	8380.55	9365.06	10495.6	9411.88	7377.53	11729.2	7607.7	14283.3	9276.27	7595.06	13399.1	10821.5	9695	29806.3	16892	27288.8	14823.5	16507.5	12122	21820.9	10250.3	11113.2	17018.4	12617	19403.8	16403.8	15856.4	13247.9	11133.4	-	-	4064	1	0	-	-	-	-	-
594	M353T210	353.269	3.49912	33541.2	33101.1	36115.1	87294.7	49334.3	45868.6	41548.3	71090.1	100655	48069.9	44394	39424.6	68822.1	48972.1	34900.3	55456.6	36019.5	25279.8	361269	412197	411172	250623	231472	180452	467283	512278	262989	428153	464135	281193	809699	787726	778482	331814	303216	245173	[93][M]+	-	123	1	0	-	-	-	-	-
595	M353T273	353.269	4.54993	1.0763e+06	1.092e+06	1.13488e+06	294350	328077	360362	18531	11762.9	17316.9	31688.4	28189.9	33041.5	25073.9	32347.3	36883.3	37164.6	29959.9	11023	21816	17738.9	18639.7	32951.5	31043.3	38380.9	23979.2	43303.5	23044.7	33416.9	27569.6	32706.1	24955.5	23495.8	24199.9	20036.7	27016.9	27096.1	-	-	858	1	0	-	-	-	-	-
596	M353T231	353.269	3.84392	8391.33	15111.8	14102.5	19856.3	23263.3	20228.2	12503.7	8813.65	10800.7	12355.5	8176.64	8273.08	12806.3	7124.93	7131.92	9683.93	6413.97	5957.31	38401.8	50249.8	49929.8	56093.8	55481.6	45470	68303.1	57491.1	48968.8	65238.5	61434.9	55660.4	97018.9	103854	118177	51355	40897.4	46554.9	-	-	4332	1	0	-	-	-	-	-
597	M353T432	353.269	7.20673	12212.1	9601.91	9179.44	4679.67	16282.4	11344.6	5189.55	6344.06	4430.47	3666.75	4179.77	4631.9	6560.69	4816.94	4677.14	5291.66	3659.47	3772.1	15765.9	19956.9	19384.9	22502.8	15923.3	14855.7	18922	17391.7	9638.53	23631.4	12129.8	7191.05	28235.8	23945	25196.4	15362.1	10024.7	11755.3	-	-	3014	1	0	-	-	-	-	-
598	M353T278	353.324	4.63425	3054.25	2196.15	2564.85	5223.23	3382.67	3695.29	1875.31	3521.95	5410.09	10704.4	5774.47	3046.89	7253.9	4327.13	8391.71	5164.69	5194.88	2484.41	6452.93	3596.43	6103.15	3156.12	4338.34	4015.14	10535.9	16615.8	3751.45	9070.28	3172.71	4151.37	3628.57	8122.82	4288.58	2408.52	13849.9	6472.48	-	-	3389	0	0	-	-	-	-	-
599	M353T385	353.342	6.41978	6442.7	6596.58	4708.36	8197.63	6335.09	8716.59	4616.58	3566.79	3558.7	3052.26	5187.36	2355.52	2460.82	1964.26	3467.07	2102.16	2437.49	1423.77	7536.33	6965.49	9298.38	4105.4	3240.58	4007.79	5187.33	6287.45	3459.66	8148.5	6206.5	6056.88	5508.57	5116.05	5706.99	2890.24	4445.8	4056.24	-	-	481	0	0	-	-	-	-	-
600	M354T232	354.241	3.86217	4557.01	5082.45	4806.9	13064.8	9226	10625.5	12210	10200.4	10440	11127.1	9071.68	10802.6	10161.8	11454.3	12930.2	11086.7	6886.73	9008.2	12599.7	12443.5	10106.8	12510.7	10864.7	11418	7703.04	12567.3	10322.1	8593.88	9074.53	9456.78	9394.79	7664.37	9827.17	6553.71	6213.66	6587.74	[94][M]+	-	2773	1	0	-	-	-	-	-
601	M354T64	354.233	1.06556	16388.3	15715.2	17613.7	12224.5	15698.4	16999.1	1156.18	1542.15	1802.14	1094.2	653.48	741.606	1300.87	927.383	2353.56	2051.26	805.737	1880.05	2175.19	2323.14	2510.07	3216.97	2995.93	2993.84	2624.24	2994.36	1948.08	2449.63	1402.66	1438.31	2668.97	2658.64	2654.3	2178.02	1590.4	2080.9	[91][M+1]+	-	319	1	0	-	-	-	-	-
602	M354T305	354.27	5.07723	138570	140264	131036	98672.1	103865	109267	32910	29713.9	29272.9	30836.5	27224.6	28522.3	29102.1	26371.1	29224.4	22302.5	21187	19022.1	35504.6	38164.1	39169	42732.2	41614.8	45532.1	40668.4	42446.9	40724.8	39368.6	35207.1	33788	42679.8	52064.2	46041.2	38753.7	32336.3	27438.8	[92][M+1]+	-	132	1	0	-	-	-	-	-
603	M354T210	354.273	3.49448	7992.19	10375.6	9287.48	24922.2	16465.3	14376.5	9537.03	19040.7	27218.9	11024	11361.8	10505.6	15377.2	11803.1	8626.32	14579.2	9509.81	6949.81	96699.3	101088	105208	62008.5	56883.9	44912.6	114962	122323	66560	106731	119327	71950.6	192889	191196	197191	83101.9	82126.1	64925.7	[93][M+1]+	-	123	0	0	-	-	-	-	-
604	M354T297	354.337	4.95412	8216.52	10510.1	6940.92	6523.47	16099	7708.68	11632.7	11897	11194.8	8598.29	11655.5	8941.6	13678.2	9069.91	8744.49	5497.68	9285.38	6055.32	5195.09	8047.94	11920.3	12042.5	18573.9	8616.3	8416.62	8021.79	7552.29	6739.57	10147.5	15997.8	11773.7	15015.9	11510.3	9455.75	10881.7	8747.46	-	-	3276	1	0	-	-	-	-	-
605	M354T354	354.336	5.89354	1631.23	1893.38	1391.91	3109.16	2626.39	2763.44	2127	2367.15	1981.64	2407.59	3248.27	2148.61	1244.6	920.423	2197.21	1936.78	1519.07	1650.01	1559.58	3045.39	2303.91	2396.7	2873.27	2692.26	1451.1	2516.42	3539.3	2678.85	2276.1	1091.56	1436.69	2098.23	1965.73	2379.41	1959.98	2073.17	-	-	3608	1	0	-	-	-	-	-
606	M355T49	355.174	0.823067	7149.99	7008.07	7786.94	1087.47	2317.49	3345.17	891.31	1064.25	926.681	790.247	448.285	602.456	649.931	865.427	708.17	865.455	551.836	493.134	996.839	484.767	943.847	1042.97	1269.98	746.946	1231.98	1284.28	591.315	1428.58	739.409	1062.1	734.776	687.384	917.705	1843.05	1025.26	1723.41	-	-	4345	1	0	-	-	-	-	-
607	M355T231	355.244	3.85577	1672.4	755.417	1244.68	4112.69	2168.84	3218.77	3693.53	2941.74	3126.9	2850.33	3467.92	3239	3281.28	3036.11	4027.9	3128.89	1996.72	2083.76	2806.4	2827.75	3056.6	3242.28	4131.18	3370.79	2738.27	3794.66	2854.92	1575.53	2129.18	2944.76	2687.31	1852.64	2136.92	1541.22	1746.62	2391.55	[94][M+1]+	-	2773	1	0	-	-	-	-	-
608	M355T290	355.285	4.82814	1.20182e+06	1.13058e+06	1.03842e+06	626735	753231	862362	56543.7	43001.8	39506.5	59131.7	52694.2	39950.7	32075.3	38804.5	47004.9	35290	25802	35553.9	396134	387284	406391	657570	712373	798843	425174	486984	529886	341520	319455	426811	386962	397879	373938	245115	186307	254432	[95][M]+	[M+H]+ 354.278	64	1	0	-	-	-	-	-
609	M355T210	355.276	3.49608	1964.05	1940.24	2496.46	3932.18	3497.17	4716.46	2968.17	3412.86	4684.93	2812.02	1281.15	1686.06	5491.5	2416.3	5045.1	1055.55	1768	1276.61	18871	16846	17273.6	14585.2	10552.8	7675.58	16274.4	20028.6	9750.34	18040.8	22039.5	11153.8	28551.5	33533.2	30217.4	13933.8	14484.9	13845.9	[93][M+2]+	-	123	0	0	-	-	-	-	-
610	M355T250	355.284	4.16228	3510.62	5160.95	5373.39	12038.6	10721.5	11929.2	8423.26	17265	25775	12165.7	12674.6	11973.1	24191.9	16622.5	13726.5	28660.8	13857.2	5545.3	21626.5	20979.6	24482.1	27884.1	23812.4	22111.4	31383.2	20344.1	22333.1	32241	33130.5	20394.3	35344.5	34203	34657.5	31557.9	28437.9	32096.1	-	-	4064	1	0	-	-	-	-	-
611	M355T307	355.283	5.12386	26322.1	14125.8	27406.9	20727.3	16386.6	13711.8	17841.2	3233.08	12406.9	17906.4	11977.5	10319.6	16249	11412.4	10625.3	22835.3	14691.6	14278.4	13205.4	21452.7	12838	42925.5	49957.5	28096.8	18257.3	23447.7	43227.4	3572.54	12891.1	4405.84	11224.2	6399.26	5304.33	5109.45	10295.2	3756.28	-	-	4644	1	0	-	-	-	-	-
612	M355T477	355.284	7.95432	3099.99	3831.55	2713.09	8640.54	30796.7	14860.8	8141.92	11086.2	17860.1	10042.2	13882.1	8200.95	10487.1	11573.9	9266.2	12570.4	9620.51	11848.5	13172.7	16341.5	24043.9	9423.22	7016.05	15012.5	18698.1	12331.4	7734.6	22919.4	11996.4	7819.3	5259.41	7634.2	9370.04	6482.83	9714.79	16641.7	-	-	3134	1	0	-	-	-	-	-
613	M355T372	355.321	6.19547	3066.75	8657.61	5571.46	2693.56	5164.98	6583.58	5740.73	3346.63	4325.85	4833.52	2512.48	5009.44	4690.97	3410	3171.59	3670.47	1817.08	4167.7	1593.36	4504.31	6617.96	3281.65	5277.7	4550.61	3908.62	3854.58	3131.73	2466.06	3100.22	4309.86	4839.47	3667.09	2396.85	4591.53	7306.71	4722.26	-	-	2050	1	0	-	-	-	-	-
614	M355T317	355.321	5.27877	2758.48	3253.52	3163.1	3863.91	2440.55	5424.78	3138.12	3448.07	2826.58	2601.04	1770.36	2198.68	2178.13	2745.21	3013.57	2415.3	2261.9	1355.05	4485.93	4935.81	3833.71	5507.77	6392.12	7772.92	6635.36	4086.6	5569.83	3622.18	2374.22	4058.93	2305.04	2764.74	2507.98	1645.97	2970.71	3537.65	-	-	4049	1	0	-	-	-	-	-
615	M355T298	355.339	4.97335	1161.73	43125.1	1989.88	33870.2	26485	32432.4	7314.36	5973.63	5349.42	2239.77	2577.41	1127.28	2720.64	3368.55	2935.13	6470.09	1715.67	5559.23	28535.6	2048.24	1779.64	2692.95	2889.53	41918.8	43326.3	2249.85	3921.84	2150.23	16150.9	23000.5	24520.9	23703.4	1484.66	1963.87	13599	14633.4	-	-	3865	0	0	-	-	-	-	-
616	M355T370	355.368	6.17306	3938.82	3087.3	2464.13	2500.75	4203.94	3463.1	3037.32	3020.01	2543.48	2573.29	2944.41	3928.27	3406.09	2406.51	4157.28	3847.94	3359.65	3631.1	1980.54	2397.84	3159.95	2932.1	3830.9	3537.11	3873.83	5119.19	2840.64	2448.11	2081.5	2967.23	1968.84	2004.56	2101.14	3138.22	4104.36	3455.37	-	-	2059	0	0	-	-	-	-	-
617	M356T311	356.17	5.17914	3887.06	4667.01	2968.22	7471.11	2925.89	7919.8	7370.61	8080.37	9084.8	4738.99	4371.57	6915.91	6947.53	6101.6	7095.75	6039.73	1925.45	5544.24	6021.58	5329.65	7081.02	7973.57	2764.77	7555.19	5438.67	5305.77	4863.43	5192.74	6202.45	3914.93	4749.53	2737.02	6153.24	3146.42	3800.48	4365.71	-	-	1445	1	0	-	-	-	-	-
618	M356T231	356.24	3.85465	923.579	1115.61	625.104	2546.14	1942.68	1705.1	1327.67	1712.92	1476.49	1493.01	1631.26	1492.88	1296.38	1234.65	1546.92	1137.67	667.884	1051.7	1837.35	1564.86	1339.11	1410.65	1433.37	1356.28	1115.52	1260	1499.35	1398.23	1565.73	1038.92	1378.5	1415.65	1193.2	1094.96	990.079	751.545	[94][M+2]+	-	2773	1	0	-	-	-	-	-
619	M356T247	356.256	4.11276	2566.28	2333.1	2097.48	8226.7	3918.3	6414	4559.77	4743.95	5972.5	4531.23	3792.48	4026.77	4408.3	5225.14	5892.35	5168.89	2954.75	3447.67	4595.47	5029.85	4074.07	5628.71	5962.67	5032.5	4651.49	6885.92	4712.06	5110.09	3785.18	4897.09	3993.07	4663.12	3636.64	2995.22	2391.25	2457.47	-	-	4463	1	0	-	-	-	-	-
620	M356T182	356.277	3.03989	1160.02	1106.59	1079.36	3438.19	1714.3	3261.96	1264.77	1135.02	1890.17	1763.63	1266.59	1446.49	1576.92	1287.02	1405.16	1203.08	824.213	792.954	1245.82	1407.33	1402.03	1534.71	1354.17	1694.76	980.345	1814.07	1047.02	1293.36	1221.04	1188.63	1237.57	1038.64	1275.45	893.425	853.569	740.817	-	-	4894	1	1	Acylcarnitine 13:1	Fatty Acyls	AcylCarnitine	-	-
621	M356T290	356.288	4.82844	306593	274665	252028	159273	182188	214644	17196.3	10557	11602.8	16844.6	16005.7	12270.8	10773	10433.7	12567	10751.3	6634.09	8872.14	93884.9	93801.1	102203	170207	170639	189488	103476	124211	135851	87632.2	73359.2	106882	90843.8	94929.7	103993	63926.7	43679.5	60983.9	[95][M+1]+	-	64	0	0	-	-	-	-	-
622	M356T301	356.316	5.01797	14010.5	15191.1	14676.1	64481.4	39482.1	50304.6	42402.2	37903.5	48033.3	45322.2	38467.7	38237.3	42706.7	40488.2	44891.6	33257.3	23521.1	23581.4	37622.1	42571.9	44631.9	17920	20020	20376.2	41376.1	45371.8	14877.6	33243.4	45366.5	44625.2	40176.9	40200.1	40802.9	28389.2	23302.4	21830.9	[96][M]+	-	1973	1	0	-	-	-	-	-
623	M356T386	356.353	6.43465	4283.23	6026.52	4817.23	33594.3	29003.1	32993.6	20510.7	14654.9	17636.6	16730.9	26688.9	15711.4	12170.5	10056.5	13715.9	12140.6	13380.2	9870.19	35283.4	37986.9	35074.8	56748.7	63799.9	56714.4	37509	43904.3	63662.1	37267	28720.5	28033.8	30799.1	31175.8	33261.9	14355.3	21506.5	27604.9	[97][M]+	[M+H+NH3]+ 338.319	160	1	0	-	-	-	-	-
624	M357T318	357.147	5.30065	1740.41	1882.4	3936.49	5332.98	3733.76	3327.97	4440.33	4097.83	3284.46	4043.09	3904.45	3531.15	3448.86	3349.09	3947.31	3537.49	3821.39	3196.85	4652.15	5520.21	4004.25	4755.84	4740.58	5334.55	4522.43	3316.46	4472.47	2277.3	3687.88	2270.25	3325.03	3866.73	3723.9	1939.8	3046.26	3263.58	-	-	3539	1	0	-	-	-	-	-
625	M357T227	357.147	3.77807	11422.2	21659.3	12428	7080.53	10024.1	10607.8	25757.2	12108.5	9594.35	5491.69	17707.4	11265.9	12829.4	18132.1	20229	4043.34	17924	18953.7	12338.2	13529.9	3480.19	9265.79	5918.22	11464	3851.6	5768.51	5789.96	12773.5	10094.1	14116.3	7060.55	11085.9	3284.45	6338.2	7909.89	12743.6	-	-	2567	1	0	-	-	-	-	-
626	M357T50	357.189	0.835458	1639.11	1541.23	1447.46	805.023	798.707	1073.78	696.571	1872.61	516.364	679.427	493.272	596.565	590.523	960.191	648.693	679.403	586.274	639.992	1540.85	1606.2	1467.42	906.833	852.108	763.918	1171.12	2153.86	711.006	1384	1258.1	1395.6	1308.3	1187.36	1078.02	2276.4	1795.4	2017.14	-	-	4346	1	0	-	-	-	-	-
627	M357T292	357.203	4.8586	5042.26	1463.53	4043.1	4083.71	4267.03	4382.28	6615.37	1575.67	3037.76	3676.58	3890	2275.19	3312.07	5081.38	4582.83	4419.81	3606.77	3494.52	3717.02	3753.13	3567.5	3859	5770.52	5234.17	4863.69	3981.85	4122.29	5691.64	4095.28	2828.83	3946.27	3777.99	1449.84	3495.56	4737.97	3882.11	-	-	1543	1	0	-	-	-	-	-
628	M357T246	357.26	4.1072	1573.05	1439.91	1252.43	2236.3	1956.64	1912.3	1459.61	1573.69	2213.97	2600.66	2024.36	1354.56	2101.09	1116.85	1965.09	2212.6	1028.65	952.495	1782.71	2045.07	2304.51	1923.56	1601.91	1413.26	2528.12	2304.12	1913.53	2452.9	1614.11	2565.75	3222.92	3053.28	2385.89	2219.22	2134.01	2101.25	-	-	2951	0	0	-	-	-	-	-
629	M357T383	357.274	6.38988	4758.67	5229.97	3446.08	3934.61	3265.52	2988.2	2497.31	2898.35	1593.03	1138.83	792.468	746.724	3139.38	2197.6	2529.64	785.113	898.62	1399.49	2446.68	2388.41	2933.94	2931.55	4593.11	3984.72	2446.95	1717.08	1966.27	1654.11	1012.87	1215.64	3009.42	1486.74	2406.52	2662.55	1312.54	907.087	-	-	513	1	0	-	-	-	-	-
630	M357T290	357.291	4.82892	51047.7	47616.9	43368.9	26681.9	27735.9	35462.3	4540.1	5317.98	4956.85	1769.77	2415.7	4698.05	3962.71	4070.06	5581.44	3884.33	2552.84	3185.28	17948.1	18578	14102.1	26895.6	34114.3	32598.5	19120.2	20094	20712.6	15777	12306.4	18256.2	16972.4	16743.1	16967.6	10834.7	7509.4	11181.9	[95][M+2]+	-	1549	1	0	-	-	-	-	-
631	M357T310	357.301	5.1667	404383	419602	357477	859619	554047	689875	732598	842315	952034	788880	708843	719146	844980	694350	796005	978541	649166	499014	665234	805292	794392	863930	870210	1.00549e+06	813085	729732	791706	632418	631250	486386	441415	456129	466472	431679	463140	574053	[98][M]+	-	1415	0	0	-	-	-	-	-
632	M357T544	357.3	9.07229	6818.86	6416.49	5302.86	9083.18	9673.34	9063.98	4191.66	3670.79	2834.73	2844.03	3855.06	3570.73	2424	2675.12	2276	2089.39	2793.71	2940.64	15130.1	12290.7	12384.1	15908	16627.8	11865.8	9708.42	16195.2	16732.2	22611.5	8423.15	8990.97	8303.04	14559.1	15342.3	7709.3	8117.95	11464.5	-	-	835	0	0	-	-	-	-	-
633	M357T569	357.3	9.48237	7613.12	5367.86	7865.83	18556.2	11024	21606.3	15766.4	22601.1	11953.8	16901.4	31016.4	15531.6	15431	11997.8	14847.2	6696.35	14629.4	13544	18540.1	18555.4	18169.5	9295.1	17482.5	12573.5	9860.23	13891.4	14632.6	19770.8	14377.9	11015.4	9615.68	12746.7	8788.51	15452.6	13930.5	17701.5	-	[M+H]+ 356.294	11	0	0	-	-	-	-	-
634	M357T301	357.319	5.01514	6528.63	4039.04	5953.91	18273.1	11363.9	15459.5	12086	11611.7	10262.5	12070.2	8993.28	11820	10909.2	11734.6	12273.1	9112.48	7492.86	7889.76	10573.8	11371.4	15174.5	7661.99	9764.47	10057.7	13019.2	14697	5617.31	9375.13	12441.3	12594.9	11058.6	9794.34	10929.6	8014.82	6316.2	8890.26	[96][M+1]+	-	1973	0	0	-	-	-	-	-
635	M357T386	357.356	6.43508	1328.21	1775.62	424.455	11084.5	8822.38	9312.37	5855.27	4160.17	5032.53	4641.17	6714.06	4426.11	3667.42	2490.43	3092.28	3311.24	3094.66	3387.22	9869.76	9859.54	9108.79	14670.5	18321.1	13712.1	10323	11508.5	15878.9	9535.12	8107.29	8411.15	6876.44	8179.84	8612.8	3876.33	5519.31	6984.47	[97][M+1]+	-	2899	0	0	-	-	-	-	-
636	M358T246	358.295	4.10053	1563.89	1509.45	1498.3	6326.99	2624.24	5997.93	1884.62	2089.17	3106.32	2516.95	2444.09	1885.44	2569.17	1869.25	2568.45	2722.88	1485	951.303	2061.57	1680.41	1605.83	2527.59	3639.12	875.958	3701.38	3808.34	1912.15	2808.31	2628.7	2671.77	2329.59	2559.76	2643.05	1964.82	2118.22	1417.34	-	-	2952	0	0	-	-	-	-	-
637	M358T311	358.304	5.17853	98073.1	99809.3	100704	208300	140635	163670	178135	213975	229937	200812	188880	186627	206104	171973	200338	235481	153243	117349	158883	182973	189072	214887	210678	253657	213055	166650	199393	162482	161343	119636	116686	115606	111381	107649	120552	131087	[98][M+1]+	-	1416	0	0	-	-	-	-	-
638	M358T316	358.331	5.26358	9313.07	7950.73	8638.08	41559.7	20760.1	30362	21052.1	18641	23439.2	19748.2	13786.1	17438	18843.6	16246	18674.9	17751	11616.4	12106.7	16872.7	16402.2	20042	10243.2	9587.56	10183.9	20997	23900.9	7784.56	15816.4	16590.7	17655.1	14082.5	13967.7	13065.1	14182.1	10909.3	11699	[99][M]+	-	4050	1	0	-	-	-	-	-
639	M358T298	358.368	4.96036	72085	95057.8	70252.5	74899.7	90319.1	70947.8	117684	75881.8	68838.9	105131	76939	75965.7	123266	86090	98670.8	91735.2	86092.2	89707.2	57170.3	66006.1	91157.3	108044	123624	90869.9	112185	101802	95341.3	71505.8	87788.2	96375.7	62012.6	61044.5	64366.9	63605.1	88068.2	73513.2	[100][M]+	-	3250	1	0	-	-	-	-	-
640	M359T354	359.292	5.89813	901.188	1178.06	838.135	3384.3	2510.63	3574.84	3081.01	2628.39	3213.93	2552.38	5160.26	2027.3	1935.43	1388.26	2091.95	1728.11	2036.94	1205.74	2469.01	2635.33	2608.98	4897.95	4507.39	4262.56	3645.67	2941.54	3923.05	2496.78	2209.55	2728.03	2789.02	2507.44	2581.62	1236.93	1272.11	1517.89	-	-	3609	1	0	-	-	-	-	-
641	M359T311	359.306	5.17845	17078.7	13345.8	13845.2	39177.8	24349.4	27166	30717.7	34306.3	38414.7	34295.8	33781.1	29329.1	36862	27120.8	31456.5	36566.1	26986.7	23103	29271.4	31125.7	32853.1	38463.3	38210.7	40695.6	36110	30220.1	38446.5	25115.8	28614	19946.7	18096.2	19408.7	22470.5	20300.8	22834.7	21105	[98][M+2]+	-	1417	0	0	-	-	-	-	-
642	M359T336	359.315	5.60214	16848.8	19333	18379.6	16566.4	13787.2	14578.5	13021.8	8848.38	9521.08	15557.7	9839.73	8365.82	12916.2	11099.3	16210.2	8184.44	9715.92	7967.59	8039.93	8216.75	9129.73	12773.5	10768.4	10476.9	10566.5	13190.7	14676.9	7720.22	7074.98	9066.94	19219.3	12372	14731.7	14697.7	9272.54	8880.32	-	-	2990	0	0	-	-	-	-	-
643	M359T316	359.335	5.26435	3486.88	4694.72	3348.8	9122.76	6347.34	8890.39	7086.38	6542.38	7184.52	4905.11	4751.74	6808.03	5958.68	4391.51	5635.2	6651.52	4136.15	3721.49	7846.48	6916.18	5159.97	2540.8	2923.35	10473.9	5793.52	6440	1756.83	5493.25	5045.48	4388.74	4778.81	4314.4	4120.21	3414.76	3242.65	3426.33	[99][M+1]+	-	294	0	0	-	-	-	-	-
644	M359T378	359.352	6.30514	3079.65	2525.22	1470.18	3752.67	4230.69	2993.23	3246.89	3551.58	3489.96	3017.3	3299.92	2268.94	4584.11	3215.97	1721.07	2271.6	2030.6	2367.18	2719.27	2031.44	2884.53	2720.29	4417.74	3467.21	3522.91	1876.49	3943.94	2315.07	2486.35	4406.94	2127.15	2756.47	2028.21	2384.92	5349.67	2563.22	-	-	4107	0	0	-	-	-	-	-
645	M359T298	359.371	4.96002	23567.3	26870.6	18848.9	24022.3	25955.2	19707.1	28875.9	20713.5	19958.6	29008.6	20957.6	19741.3	32276.7	23711.9	21133.6	24632.9	25013.8	23802.5	16542.7	15514.9	27344	26641.4	35360.6	28066.6	30548	26556.5	24508.5	20256.7	19752.8	25142.5	16300.9	18430	18575.3	21310.3	24628.6	19701.6	[100][M+1]+	-	3251	0	0	-	-	-	-	-
646	M360T40	360.15	0.671575	7073.57	7655.11	6101.99	2695.31	12048.3	4158.82	140809	209839	168317	6718.62	7792.32	4131.28	23221.1	76796.5	36116.7	51223.3	1859.85	2497.3	6686.48	6735.84	6747.69	243882	239390	53211.4	19658.5	49267.5	79443.4	7899.44	6015.32	6020.96	5680.19	5915.17	5785.21	31407.4	101729	28595	[101][M]+	[M+Na+NH3]+ 320.128 [M+H+NH3]+ 342.117	127	1	0	-	-	-	-	-
647	M360T196	360.251	3.26144	1835.61	2047.34	2239.54	1091.47	669.209	1202.96	617.15	997.429	904.417	496.09	829.038	698.869	816.315	658.664	702.429	665.217	548.678	702.824	2322.6	1692.01	1572.64	2429.61	1848.42	2449.81	2432.5	2130.57	1946	3880.78	1765.21	1436.8	2363.44	2090.16	2445.13	1756.07	1669.73	2036.38	-	-	4752	1	0	-	-	-	-	-
648	M360T310	360.309	5.17344	3463.07	5675.96	4472.3	5980.87	7016.8	6906.46	3865.13	5977.32	5185.2	7034.36	7494.22	5632.09	7103.11	5119.92	6852.88	5152.02	6170.22	3672.39	5482.33	4547.27	4865.69	6667.66	7207.46	5533.16	6170.49	7447.53	6402.15	5817.06	5668.09	5309.64	4799.98	4297.08	3479	1936.19	4568.16	4134.92	[98][M+3]+	-	1418	0	0	-	-	-	-	-
649	M360T371	360.324	6.17507	108387	126390	99818.2	154018	187697	164970	228031	169384	157149	218678	191694	175117	215280	156610	190212	214315	197606	204738	168448	150851	180435	140005	184847	160643	227551	154355	163161	142011	163359	205258	153735	151399	168609	154703	176688	153519	[102][M]+	[M+Na]+ 337.335	100	0	0	-	-	-	-	-
650	M360T298	360.374	4.95858	2569.51	4211.05	4065.3	2067.7	1151.14	3249.81	4695.01	4169.34	2421.9	4471.4	3421.73	3899.6	5368.66	3463.7	3873.06	3697.16	4331.93	3693.05	2289.73	2717.08	5064.93	3836.03	4297.19	3927.6	2905.54	5565.23	5910.38	3135.92	3174.4	4658.12	2959.53	6203.26	3524.5	2106.29	4875.3	1096.13	[100][M+2]+	-	3259	0	0	-	-	-	-	-
651	M361T41	361.154	0.675783	2367.56	1314.01	2201.04	788.16	2478.51	1132.84	22839.6	34043.1	27676.5	2413.55	1110.56	655.922	4399.6	13118.3	5684.46	9495.25	370.865	450.891	948.72	1273.67	1430.46	38514.9	43376.8	8394.4	2975.06	8960.04	13711.6	1477.74	1025.87	1377.51	1121.27	1022.59	1105.13	5532.48	14897.6	4458.18	[101][M+1]+	-	127	1	0	-	-	-	-	-
652	M361T386	361.308	6.43465	833.019	2663.7	2080.87	33461.8	26712.8	26439.9	35059.8	29203.1	34933.7	27652.3	51215.6	28072.7	22586.4	20699.5	24168.4	20751.7	26735.4	18706	62537.6	63590.5	61186.2	91759	92840.3	84894.6	53359.8	59779.5	91086.2	59632	50774.5	44248.9	52711.3	52963.7	47208	24265.5	35865.5	40418.8	[103][M]+	[M+Na]+ 338.319	160	1	0	-	-	-	-	-
653	M361T371	361.328	6.17517	31419	32499.9	29273.9	36486.6	50107	47802.2	56462.8	39769.5	43717.9	52164.1	49087.6	49513.1	55194	38321.8	48168.5	47828.9	53059.9	51932.5	40707.5	40926.6	50870.4	38792.9	47380.6	44696.8	54962	37618.3	41723.5	36125.1	45075.2	53774.1	42366.9	40567.4	41488.7	41154.2	45505.4	37399.1	[102][M+1]+	-	100	0	0	-	-	-	-	-
654	M362T41	362.155	0.685017	1397.88	678.416	2152.04	758.911	655.799	954.893	6029.91	9149.84	7196.5	1191.48	647.178	557.87	1168.53	3837.65	1544.66	2506.12	517.423	526.748	747.858	768.952	925.895	8928.75	11401.9	2154.12	1350.48	2191.17	3584.95	805.126	621.707	731.564	762.343	598.049	786.844	1431.26	4433.23	989.109	[101][M+2]+	-	127	0	0	-	-	-	-	-
655	M362T318	362.236	5.30774	1690.26	1933.03	3151.26	2436.3	1970.44	1999.15	2953.85	3261.9	3598.42	2594.55	1780.52	2299.1	3126.02	1474.39	3046.67	2870.18	2138.62	4223.86	2179.94	3813.25	2526.18	3123.9	2413.59	2938.14	2686.9	2886.56	2810.54	2221.45	3421.85	2536	2567.93	2437.88	1903.9	2785.99	2504.29	2383.08	-	-	3543	0	0	-	-	-	-	-
656	M362T281	362.246	4.6764	17887	15471.6	16774.5	11456.2	9557.19	14317.3	3843.97	2257.63	2395.86	2038.21	3187.33	1935.48	2791.67	2373.14	2585.81	2200.79	2335.34	2927.29	9015.39	8251.19	10168.5	17261	16669.6	24556.3	11011.7	9349.4	13554.7	10437.7	4701.81	7859.16	7224.95	6528.3	6969.6	5046.35	3482.6	6655.36	-	[M+K]+ 323.283	142	0	0	-	-	-	-	-
657	M362T198	362.267	3.29198	5189.64	4912.51	5074.39	4684.38	2719.08	2416.25	3687.51	6137.41	6791.38	2973.02	3375.93	2398.68	3390.7	3772.82	2685.62	4162.52	2121.52	2317.16	28660	25981.3	26821.3	19472.9	15369.9	18170.4	24314.4	22367.8	21424.1	31588.2	16925.7	13249.9	31676.2	30884.1	35215.5	16469.8	13189.2	13245.1	[104][M]+	[M+Na]+ 339.278	385	1	0	-	-	-	-	-
658	M362T332	362.291	5.52773	4250.81	7765.57	3112.23	3393.78	7278.82	2466.74	6772.47	2891.28	3343.87	7869.48	3708.76	2687.64	5259.24	3533.65	3588.5	4078.22	5416.18	3813.28	3222	4197.07	5129.85	4163.63	4270.39	3013.8	4771.2	2917.01	3004.1	3359.94	6265.76	4607.07	4859.52	4112.58	3970.25	3404.29	5587.35	4866.9	-	-	4512	0	0	-	-	-	-	-
659	M362T386	362.311	6.4355	889.48	1325.78	865.807	9265.45	9780.77	7215.08	8716.04	8002.56	8507.8	7882.63	12950.5	7360.59	6009.04	5853.03	5472.58	5156.53	5596.96	4194.95	14723.1	16164.4	14943.9	22926.7	24662.4	22077	15719.1	16016.8	23227.1	15643.3	13323.3	11343.4	13704.1	13272.8	11870.8	6504.28	9805.06	9375.75	[103][M+1]+	-	2900	0	0	-	-	-	-	-
660	M362T371	362.33	6.1758	6379.77	6942.8	4473.2	5750.39	8913.6	7615.47	8783.41	8576.69	5430.17	9390.01	7371.77	6451.94	8755.89	6230.78	8463.8	7387.38	8482.09	8361.55	3706.94	6759.33	8670.25	7537.21	9405.76	7987.37	7778.32	7228.39	7555.59	6353.65	8419.09	6788.99	7468.46	5730.46	5807.4	6671.67	7699.92	6491.76	[102][M+2]+	-	100	0	0	-	-	-	-	-
661	M362T406	362.34	6.76684	445.168	0	445.098	1495.69	1312.9	397.158	2480.23	1809.19	2033.32	2392.75	2000.66	1603.43	2377.83	1958.96	2553.3	2231.85	2036.29	2413.98	1927.92	2757.07	2112.18	2786.98	2924.23	2829.99	3456.61	2253.06	2066.75	2315.05	1487.74	2746.22	1877.18	2227.62	2480.58	2551.16	2389.5	1121.02	-	-	2406	1	0	-	-	-	-	-
662	M363T996	362.927	16.5981	21513.1	17891.6	18241.9	16152.5	26339.8	19007.5	23721.1	17237.7	17428.5	12207.1	18070.8	18491.8	20025	19990.6	19509.8	7290.11	11962.3	14052.6	22605.2	20907.4	19614.1	20413.6	19017.7	18702.6	16963.5	11916.8	13526.7	25721.3	24263.2	18899.5	16158.6	17983.1	18075.9	21143.7	17032.4	16938	-	-	4713	0	0	-	-	-	-	-
663	M363T274	363.17	4.56257	7940.89	8602.96	4785.16	8495.22	4997.69	5208.41	6243.86	2528.34	5130.66	4846.99	3670.57	3825.05	3578.42	3301.65	1452.81	3519.11	5604.85	4079.73	3173.49	4374.29	6196.98	4393.23	4469.35	9873.69	2474.18	3924.92	4831.41	6252.98	3050.28	4809.68	5045.73	4222.49	4971.96	6519.63	11752.2	3421.24	-	-	2767	1	0	-	-	-	-	-
664	M363T312	363.181	5.19345	8222.68	6953.89	7157.26	9810.75	6045.8	8451.24	9539.94	6078.09	2639.16	6527.4	4087.55	5189.6	5852.25	3768.13	4182.14	3427.95	6129.05	4542.63	9622.25	9147.6	6778.91	9605.04	8177.96	10581.8	7265.22	7341.54	10747.9	7146.17	8601.5	7015.83	6853.37	6328.91	5544.46	4842.9	5812.68	7655.81	-	-	1446	1	0	-	-	-	-	-
665	M363T280	363.25	4.67021	15905.4	14429.8	15034.3	7064.75	6036.05	7579.63	2693.68	3696.63	4383.93	1067.02	1377.34	2838.05	3915.57	1386.88	3193.65	3602.65	2114.88	3984.95	3421.27	3158.62	3732.84	6595.51	6522.7	7982.14	3810.1	4983.56	5563.56	3664	2359.2	2855	2543.98	2929.65	2943.67	1647.49	4346.03	2605.41	-	-	2623	1	0	-	-	-	-	-
666	M363T198	363.27	3.29243	1193.19	1609.65	1785.91	1125.2	684.273	1110.81	1009.02	1202.59	2000.85	663.816	1166.53	1295.09	1330.84	931.997	903.107	1304.95	1084.42	745.493	6449.44	6589.56	6425.42	4480.75	3475.99	4081.66	5753.09	5107.67	5349.61	7634.42	4282.43	3340.69	7804.65	8161	7701.91	4418.23	3474.1	3683.63	[104][M+1]+	-	385	1	0	-	-	-	-	-
667	M363T268	363.311	4.46063	30208.3	41118.5	27168.1	21471	42253.2	34486.6	18595.6	30523.5	19775.4	23607.8	25525.1	23341.4	38496.9	20584.6	18995	28731.4	24239.5	19255.6	39317.8	23440.5	21890.2	18508.8	14441.8	11975.1	17781.2	36190.2	18640.1	21217.5	22325.8	43739.1	39496.7	23208.5	25791.3	19034.6	32308.3	33552.4	-	[M+K]+ 324.348 [M+Na]+ 340.321 [M+H]+ 362.303	4454	0	0	-	-	-	-	-
668	M363T385	363.314	6.42128	854.735	2214.51	1756.5	2698.95	4333.88	2404.16	3169.23	3169.6	2812.9	2208.02	6123.47	2157.88	2076.38	2119.95	2018.33	1608.66	2237.48	2097.6	4596.29	3165.5	3379.97	5219.95	5128.27	4736.09	3933.02	5294.6	5530.39	3761.05	2777.07	3200.5	3426.48	3570.14	2823.41	2119.73	2881.33	2364.74	-	-	4817	0	0	-	-	-	-	-
669	M364T301	364.262	5.01448	5426.95	5167.66	4608.23	14512.1	5481.1	9742.59	11751	17125.8	14136.8	12436.7	15663.1	12518.8	5236.07	7751.91	10561.1	6634.59	10445.7	13378.8	15168.2	17684.8	14658.6	22882.2	23815.2	31267.4	16903.8	17233.9	25540.4	12926	12346.3	8915.77	6768.72	7044.38	7336.68	7098.77	5253.63	9068.03	-	-	1977	1	0	-	-	-	-	-
670	M364T285	364.283	4.74259	2148.8	2225.87	2063.87	2967.23	3660.33	3935.59	2815.2	2128.18	2595.44	2863.72	3743.08	2813.63	2167.22	2166.14	3521.61	2454.93	1825.11	2270.62	2774.16	1704.29	2294.86	2362.59	2638.35	3527.07	2989.66	2782.73	2175.37	1530.41	2332.67	2279.16	2615.16	3404.09	2673.69	1661.99	2131.71	2220.16	-	-	3093	1	0	-	-	-	-	-
671	M364T241	364.282	4.01967	4916.77	2009.77	4962.17	4083.89	3736.86	1564.31	2296.75	2155.84	2171.41	2559.78	3578.64	2013.08	2369.92	2140.11	2065.99	3223.22	2269.53	1827.49	2716.33	1353.52	2947.56	2215.81	1775.69	2566.66	4597.73	2200.42	2364.58	2052.43	2448.25	2595.21	1933.71	1659.06	1711.58	1566.6	1200.58	1632.33	-	-	2946	1	0	-	-	-	-	-
672	M364T341	364.319	5.6792	2978.49	2524.84	2082.97	2466.33	3599.7	2323.97	3356.55	2179.87	2269.41	4278.35	2034.22	2584.85	3455.58	2840.8	1760.52	3019.12	2401.6	2259.05	1839.77	1836.9	2695.8	2638.76	4437.66	2667.39	3273.18	3033.62	2994.51	1907.24	1879.12	2713.29	2481.88	2117.28	2796.73	2294	2929.01	2376.35	-	[M+K+NH3]+ 308.331	344	0	0	-	-	-	-	-
673	M364T267	364.315	4.44655	14139.6	14575.6	13681.9	7305.55	13292.7	15372.8	8279.08	2323.7	5031.11	4488.26	4975.56	4959.3	10717.3	11843.5	4558.65	4802.63	5030.48	5631.09	6417.12	6812.23	5573.7	6423.72	8282.37	7274.71	5886.93	3710.24	7510.37	4822.59	3658.08	7008.35	5645.14	4569.23	7345.77	3414.79	5288.49	5572.21	-	-	4579	0	0	-	-	-	-	-
674	M364T232	364.321	3.86511	98572.2	101545	101512	52196.4	44483.1	67298.2	8178.75	8153.83	6735.54	8850.05	6204.53	5127.46	5683.71	8337.6	9274.31	5978.03	4341.84	7493.61	10320.8	10754.4	10198.4	17839.4	18385.7	21553.5	12261.5	12539	13257.8	9767.39	8847.74	12806.7	11092	11187	12339.9	6316.29	4940.21	8288.15	[105][M]+	-	154	1	0	-	-	-	-	-
675	M364T302	364.342	5.03233	8165.94	9241.94	8359.98	10917.9	11437.3	8208.74	12599	11131.1	8671.51	14526.2	9773.48	10746.1	16657.3	8088.18	10914.6	10669	8892.48	10225.7	7960.57	12645.8	15000.6	9709.98	11703.8	10816	10994.8	10373.7	8675.16	7956.83	10820.1	11869.7	10331.6	10670.6	8646.67	12206.1	10988.8	11305.5	-	-	4669	0	0	-	-	-	-	-
676	M364T359	364.357	5.98912	2748.94	5034.89	3462.46	3174.07	3980.88	3046.64	3364.31	3063.27	2863.98	3993.14	2609.98	3384.41	4051.69	3214.19	3479.96	3380.04	3571.95	2867.48	3122.56	3392.49	4150.14	3170.89	4265.49	3708.39	4659.61	3064.14	3235.09	2378.95	2221.59	4099.16	3880.96	3159.09	2747.81	3238.99	4774.42	2846.22	-	[M+H-CH2]+ 377.382	367	0	0	-	-	-	-	-
677	M365T43	364.964	0.714758	1137.54	1149.79	1261.74	1452.57	1077.45	1388.06	4528.73	5610.63	4274.75	1803.66	1043.05	1680.65	3014.81	3692.36	3086.23	5082.03	1862.94	1498.14	1778.46	2543.55	2465.35	5576.67	1959.49	3058.42	2791.78	2948.79	3817.39	2035.93	1760.69	1929.35	1898.89	1853.74	1950.22	2900.67	3295.19	2547.83	-	-	3222	1	0	-	-	-	-	-
678	M365T40	365.106	0.671033	26519.4	24795.8	21955	13547.4	43486.6	15128.7	384658	516859	467150	59649.3	65145.2	33375.4	135805	365577	167881	378625	25455.5	32403.5	43237.1	57168.4	40630.3	467425	359279	225935	82163.6	195628	368169	88722.1	45257.7	53835.2	61901.7	65122	76277.7	198350	300256	181112	[106][M]+	-	134	1	0	-	-	-	-	-
679	M365T998	365.106	16.628	14925.4	9999.85	9353.06	13576.8	6722.17	9092.01	9694.79	7133.72	8177.04	9841.42	6689.76	7317.7	9452.76	14339	12567.2	13817.2	9224.51	10450.9	13249.8	10047.4	11935.6	18469.8	9731.87	11698	9795.78	8622.94	12259	7162.08	26037.3	13792.3	8126.22	5413.6	14450.4	11183.6	13207	10764.2	-	-	4714	1	0	-	-	-	-	-
680	M365T298	365.266	4.96395	30147	31702.9	20536	19997.4	17967.7	17580.6	14972.3	15647.4	17702.9	15175.6	17408.4	15913.1	16831	14507.8	17683	16589.1	13312.7	17182.5	18127.4	19777.6	22095.7	20895.9	23097.5	23667.9	17560.6	19502.9	22709.1	14385	16004.6	23448.7	13706	14208.7	14119.7	13455.6	13579.9	14566	-	-	3277	0	0	-	-	-	-	-
681	M365T352	365.302	5.86401	24283.4	31002.1	25132.7	11781.2	9812.52	16165.7	2142.48	2715.51	2706.73	1713.18	2622.07	3309.86	3023.18	1398.69	3534.95	2448.72	1620.7	2600.82	2612.54	2494.07	1528.14	2425.42	1781.89	4689.61	3144.74	2959.46	2954.42	3208.9	3038.02	3901.98	1148.87	2592.87	2708.13	1720.14	3332.25	2046.63	-	-	3576	1	0	-	-	-	-	-
682	M365T232	365.324	3.86513	26252.3	27354.1	26028	15638.1	12081.5	19187.7	2466.61	2676.07	2187.16	2795.55	2216.6	1740.64	1695.94	3062.85	2427.51	1562.79	1005.74	1885.92	3472.95	3161.7	2857.5	4326.4	5631.92	6136.36	3190.21	4243.73	3928.25	2640.88	2352.04	3752.85	3131.88	3252.69	3074.23	1914.54	1606.19	2578.03	[105][M+1]+	-	2779	0	0	-	-	-	-	-
683	M365T301	365.346	5.0184	2577.34	2586	21032.9	2524.22	11557.3	2536.87	3541.81	9910.07	1843.9	3208.96	3169.9	2181.28	6063.49	3305.25	2290.3	1272.48	9137.38	3088.87	2621.02	3122.1	4942.62	3038.24	18877.9	19526	3579.18	14889.5	3463.55	2468.63	13234.6	15250.5	3245.87	1474.24	2649.52	3313.59	4124.94	2318.87	-	-	1978	0	0	-	-	-	-	-
684	M366T40	366.11	0.671	4202.61	3831.93	4619.51	2010.11	6143.2	1934.43	60864.2	76429.8	76185	9330.88	10090.6	5253.13	20377.6	63444.5	25093.3	58465.5	4140.06	4744.72	7011.73	9001.68	6836.66	69465.5	59368.8	37934.3	11793.2	30597.8	61229.7	13666.8	7474.2	8676.92	9668.77	10817.3	11225	32239.3	46401.5	31675.9	[106][M+1]+	-	134	1	0	-	-	-	-	-
685	M366T251_1	366.262	4.18921	117151	116316	124218	351186	1265.21	197874	57142.9	73756.1	58744.5	1848.1	7186.79	3777.81	1601.88	41765.9	2129.63	2921.6	2384.58	4271.29	2958.68	218818	2488.03	354098	384975	519166	2500.98	298858	296925	4453.45	5578.52	231844	3163.77	3699.65	4557.51	2531.26	3318.06	3139.28	-	-	138	1	0	-	-	-	-	-
686	M366T297	366.27	4.95067	8350.73	8397.26	7492.35	5710.3	3871.27	5570.95	3911.53	2848.55	5827.74	3723.68	5713.03	4581.33	4576.77	1383.62	5909.04	4911.85	4321.07	2933.65	6780.52	4359.37	4745.19	3734.78	5448.91	5331.74	4691.78	2501.75	8128.07	2914.47	3356.02	5696.37	3647.93	5502.79	2859	4871.86	6302.44	6151.63	-	-	3278	1	0	-	-	-	-	-
687	M366T324	366.277	5.39498	2027.81	2242.87	2049.79	3362.81	1890.4	2040.84	4094.11	1820.31	2139.64	4475.49	3156.36	3121.85	3801.01	1797.27	2622.59	2215.47	3064.5	2157.72	1701.6	1508.15	1943.99	1615.67	1916.91	1805.96	1475.05	2412.48	4603.39	1465.19	1641.84	1417.49	4307.74	4216.43	3530.17	5281.2	1470.32	1355.16	-	[M+K]+ 327.314	276	1	0	-	-	-	-	-
688	M366T256	366.298	4.26383	5005.07	3167.65	108181	18658.1	5995.08	5537.34	10966.2	7438.12	11747.4	12928.5	12398.7	12714.3	9145.43	12511.3	16169.2	13118.2	5271.55	8259.85	6360.82	7509.07	5458.94	280531	12027.3	9619.83	7828.8	9900.35	8951.37	9360.61	6339.8	6111.73	164506	155663	166628	80398.4	44834.8	5992.3	-	-	2935	1	0	-	-	-	-	-
689	M366T303	366.313	5.04806	11486.6	12143.6	12642.6	2200.83	3653.36	5592.69	4186.7	1366.22	3013.56	5238.54	4558.3	3649.1	2017.86	3679.22	2514.06	3361.25	3762.42	4459.09	1948.24	5777.26	5476.05	6051.68	5403.86	2297.96	4511.99	4574.32	2286.32	4271.04	4183.92	4449.05	3174.76	4239.56	4529.78	2580.8	4020.51	3878.9	-	-	429	0	0	-	-	-	-	-
690	M366T251_2	366.337	4.17972	118198	116251	123461	345025	128682	196132	50757.9	73058.5	55165	64993.7	54098.4	49261.1	18464.1	33872.6	36307.8	23174.3	26665.8	30506	212816	212496	193604	357366	379432	521130	216698	295701	294611	232367	177937	230230	207529	205131	209553	85184.8	43395.8	108193	[107][M]+	-	138	0	0	-	-	-	-	-
691	M366T408	366.373	6.80267	14684.5	24397.3	7550.45	25555	30179.8	22435.4	21258.3	16970.4	17154.4	22887.3	17608.9	16702.8	22125.5	15858.3	17447.5	18361.6	17878.7	17091.3	19113.6	21976.1	25178	19218.2	29515.5	22192.5	24144.3	20458.8	19099.5	16557.3	19135.5	25292.4	19101.9	18959.3	21027	18839.3	22331.6	17112.3	[108][M]+	-	985	0	0	-	-	-	-	-
692	M367T43	366.961	0.714	760.24	1359.69	1134.73	1423.07	1368.44	1674.56	1872.88	2844.28	2516.75	1890.09	1528.54	2087.92	2155.3	2683.98	3500.4	2844.73	1377.46	1363.87	2016.23	1718.49	1836.48	3090.47	3106.65	2007.98	1629.98	3390.86	2275.24	2210.21	1797.3	1555.85	1643.86	1759.71	1629.94	3520.87	3629.97	2338.45	-	-	3212	1	0	-	-	-	-	-
693	M367T40	367.111	0.671033	873.925	624.96	1564.37	638.576	1511.87	845.719	15159.6	17255.3	17504.8	2211.88	2565.35	1441.08	5523.79	15643.5	5858.13	15378.7	1124.46	1500.52	1585.33	1905.94	1710.02	19097.4	17052.5	9623.76	2854.78	7240.72	16514.5	3715.88	1771.01	2218.68	2276.5	2567.01	2702.85	7290.63	10435.5	7359.21	[106][M+2]+	-	134	1	0	-	-	-	-	-
694	M367T319	367.216	5.3086	1963.26	2302.43	2206.59	3266.81	1217.92	3103.7	2458.82	3151.39	2328.74	2141.21	3063.36	2161.71	1894.38	1639.39	2082.22	2903.06	2264.51	1186.07	2890.61	2756.25	3377.05	2504.8	2523.13	3548.32	3792.54	2201.18	2320.53	1784.7	1736.99	1535.71	1866.2	1753.61	2291.99	2798.14	2041.91	2283.31	-	-	3544	1	0	-	-	-	-	-
695	M367T282	367.224	4.69551	4609.26	5305.76	6475.67	3331.27	2720.46	3843.7	3910.02	1386.13	3434.55	4361	4546.87	3213.17	3681.51	2984.86	3592.95	2890.19	4512.32	5135.31	3823.54	4681.53	2351.8	4794.16	1121.04	1769.23	1191.62	1935.52	5186.02	2204.16	3551.39	1130.05	3725.81	3568.83	4171.68	3016.98	2665.66	2362.88	-	-	4302	1	0	-	-	-	-	-
696	M367T170	367.248	2.83372	8009.77	9078.21	5451.56	6477.8	4569.25	7972.94	1893.27	3089.1	2632.73	2765.47	3899.33	7262.99	2527.93	2149.45	7506.15	3305.79	5539.42	2349.55	3598.97	3638.64	3848.56	4201.08	5274.87	5310.31	4811.86	5375.58	5028.75	14712.4	11062.3	10538.1	9199.47	8959.63	10499.8	9458.01	11140.8	9739.7	-	-	459	1	0	-	-	-	-	-
697	M367T198	367.247	3.29258	6769.74	7099.14	12358.7	5090.14	5377.03	5840.16	5114.42	7697.49	4965.57	4566.85	4448.19	5359.31	4443.02	4851.95	4598.08	4540.76	20431.7	11316.8	4775.38	4693.58	4073.69	8699.74	5749.95	6041.58	3903.16	5159.47	10930.4	9946.66	8336.37	8483.1	8879.58	9587.83	9040.08	7192.22	8669.73	6204.24	-	-	4491	1	0	-	-	-	-	-
698	M367T68	367.247	1.12613	2553.49	3086	3433.8	3585.74	3849.23	2009.89	1041.78	1063.74	1351.91	1064.43	1041.85	948.914	1250.99	1341.71	1549.8	1417.6	1033.04	1027.79	1315.53	1144.88	976.587	1305.05	1392.44	908.998	1768.83	1591.19	1302.59	1495.87	1633.09	1307.03	1524.72	1432.36	1631.24	1503.81	2003.27	1494.97	-	-	4869	1	0	-	-	-	-	-
699	M367T318	367.282	5.29487	46500.7	34930.8	40632	36339	40743.5	48462.1	22989	23953.8	27115.8	32229	28818	28778.8	31563.5	21652.8	27399	28796.5	27079	27191.5	27314.6	22976.9	35100.6	31433.5	39081.7	24842.9	26150.7	25857.9	36060	22361.6	27029	19685.3	27039.9	26173.2	24907.8	24959.7	21396.6	26068.9	-	-	4467	0	0	-	-	-	-	-
700	M367T600	367.321	10.0054	11035.8	11685.3	10128.8	19723.8	29331.9	37440.8	9518.83	13535.3	6807.15	7248.29	23073.4	6848.92	3872.45	5702.21	5192.22	3839.69	10167.8	7725.41	8162.33	6533.77	9969.37	9423.99	8542.47	7492.72	4643.43	6111.3	8533.95	10895.4	3236.96	4053.29	3438.45	4365.05	4761.59	3488.5	2788.57	5691.7	-	-	4543	1	0	-	-	-	-	-
701	M367T360	367.318	5.99593	3852.43	5149.1	3210.72	3289.27	2641.35	4467.18	4151.76	3608.21	4758.26	3669.54	3398.02	3174.15	4431.42	2892.21	3459.95	3468.23	3425.84	4460.35	4570.16	3692.29	4774.13	3588.98	4662.38	3804.81	2401.04	3418.57	2657.86	2546.52	3436.41	4082.83	3098.81	3330.44	3519.94	3235.55	3107.71	3497.74	-	-	4393	1	0	-	-	-	-	-
702	M367T338	367.321	5.63944	19101.1	22277.6	18717.1	10792.5	10715.1	11136.1	4673.13	2495.82	3138.69	3905.76	3854.16	2360.83	3135.6	2952.65	3577.7	2150.7	2706.52	3065.7	2802.43	2899.46	3030.81	4186.86	5686.51	4511.42	2876.3	3844.18	2751.79	3418.48	2547.04	3462.04	3993.17	3485.93	2881.63	3143.06	1850.88	2424.06	-	-	4115	1	0	-	-	-	-	-
703	M367T251	367.34	4.17907	29823.8	31371.4	31747.2	90665.7	32903.3	49786.9	12804	20865	14495.5	16765.5	14001.6	14403.8	3987.22	9199.73	9200.56	6055.32	6966.34	8007.5	58244.7	60176.5	57302.2	95338.9	91570.8	130988	59926.6	80353.7	83666.2	63522.8	47247.7	62373	59928.6	56498.1	54404.2	25321.2	13603.9	24925.5	[107][M+1]+	-	138	0	0	-	-	-	-	-
704	M367T428	367.357	7.13355	5788.5	7574.41	4454.4	24992.9	16015.4	23079.3	36345.7	42631.3	47855.7	40493	67501	41235.3	32102.1	26811.8	28813.9	27627.3	38176.9	20433.1	51928.4	58370.6	58076.9	80118	86672.6	72793.2	59112.1	54336.8	86884.8	63221.2	46624.7	43790.1	41073.2	45728.6	39238.7	34598.9	34168	47817.3	[109][M]+	-	22	1	0	-	-	-	-	-
705	M367T408	367.377	6.80148	5714.79	10243.6	4888.12	5943.59	11042.1	9198.48	6310.98	5240.68	5573.81	6551.02	5145.19	4405.37	5844.66	4938.39	4781.35	4815.14	5088.54	5340.95	6006.36	6702.43	8591.3	6120.48	7949.96	9029.92	8294.33	7621.29	6883.78	6827.7	5702.95	8905.35	5316.34	7263.66	4219.57	6436.75	6894.32	5328.26	[108][M+1]+	-	985	0	0	-	-	-	-	-
706	M368T317	368.286	5.28459	9154.77	14806.9	10413.2	9378.23	9171.77	11262.6	6356.89	5562.29	4775.86	8957.35	6680.57	5504.44	4896.2	7138.34	8179.33	6670.99	9327.09	7305.89	7355.59	7490.42	11334.2	6737.29	6841.58	7322.79	5526.19	6418.49	7285.71	6095.29	5184.87	8767.91	5944.33	2882.94	4276.75	7333.18	5401.63	6761.28	-	-	4405	0	0	-	-	-	-	-
707	M368T275	368.314	4.57768	1344.3	1630.75	6535.14	5995.11	2929.37	2507.43	11174	9913.48	12119.4	10945.6	11813.5	8307.6	14289.3	12894	8183.81	11311	3541.02	5138.06	6687.52	6540.38	5148.69	5394.74	7377.13	9375.96	4934.72	7725.75	8685.72	6225.37	3817.27	10003.2	3018.91	1775.97	2612.13	5616.56	2654.21	2378.31	-	-	4368	0	0	-	-	-	-	-
708	M368T600	368.324	10	3683.5	4808.29	3905.77	6019.44	8177.61	12476.5	2504.64	4931.52	2006	2445.96	6961.74	2023.98	1424.17	2112.62	1154.76	1049.72	2184.55	2604.16	2293.38	2700.56	1730.28	1748.43	2511.83	2922.71	1798.95	1384.76	2006.13	3150.97	837.084	1234.69	672.32	1653.49	1210.41	1663.07	867.506	1761.28	-	-	4543	0	0	-	-	-	-	-
709	M368T251	368.343	4.18061	4970.46	4541.51	4716.66	16096.1	5457.71	7096.76	2545.06	3617.72	2372.89	2677.95	2504.3	1866.11	1501.64	1019.37	1564.95	1885.49	1376.36	2073.2	6821.26	10548.8	10363.8	14494.2	15668.5	19367.8	9334.64	13634	10573.7	12233.9	9906.69	10548.5	9539.32	8707.37	9183.94	2920.95	1507.05	5110.06	[107][M+2]+	-	138	0	0	-	-	-	-	-
710	M368T270	368.352	4.50713	36869.1	33973.8	39613.5	81990.1	48566.4	79969.2	77439.9	64830.6	86888.2	56924.9	57938.5	51611.8	55662.8	56622	66006.9	47898.6	42977.3	44014.7	39326	37263.5	43427.7	73396.9	85870.8	104110	57543.3	50161.7	54157.8	35575.9	36242.4	41249.4	36772.8	36261.1	39039.5	28200.3	18004.9	25378.8	[110][M]+	-	3434	0	0	-	-	-	-	-
711	M368T428	368.36	7.13274	445	1782.37	1334.34	9206.91	7118.85	8121.72	13447.6	12248.6	11566.2	10728.8	19530.9	15723.3	13605.5	9664.75	11223.3	8773.72	11095.6	7466.26	18102.8	16496.3	14719.4	24176.4	30021.5	23644.3	18098.6	16482.5	24969.9	21231	15165.6	17938.8	11867.4	14126	15388.4	11458.6	7775.16	11267.5	[109][M+1]+	-	22	0	0	-	-	-	-	-
712	M368T448	368.388	7.46135	4363.52	7953.14	6047.64	4902.31	6662.92	7063.55	9541.1	5850.17	6286.18	7562.59	5505.77	4925.04	9011.17	7002.17	7282.27	5439.37	7300.14	5644.9	7281.18	6952.02	7292.85	7094.56	9139.76	7329.11	7094.03	9050.74	6697.13	5829.32	6004.12	7092.48	4212.4	5896.57	8968.04	7215.44	6996.65	6813.84	-	-	1028	0	0	-	-	-	-	-
713	M368T343	368.425	5.71548	4535.31	8805.9	6360.84	6521.01	7334.49	8246.72	8474.09	6045.66	5661.82	10031.7	5804.93	5801.73	7339.03	5817.93	6809.04	6626.83	9593.43	7161.6	9774.81	6956.24	7857.85	6107.96	14394.6	6300.53	8936.74	7088.89	9214.91	6142.18	5478.36	10214.7	9337.71	5678.93	8191.64	6555.37	9866.15	5917.63	-	-	3662	0	0	-	-	-	-	-
714	M369T311	369.199	5.18615	18267.5	17520.4	17573.8	16511.6	15683.5	14849.3	12160.2	9485.02	12685.8	7995.9	11232.1	13213.6	11960	9796	11263.8	12430.8	9841.26	13074	18445.8	21391.9	20221.8	19890.4	21461.7	23787	17833.1	21632.4	18481.2	17402.5	16430.8	16908.3	15214.6	16509.6	16739.7	13667.4	12732.4	13158.1	[111][M]+	-	1400	1	0	-	-	-	-	-
715	M369T63	369.204	1.05808	7175.29	7371.89	7521.81	5303.02	6467.34	8758.63	964.151	925.289	861.25	593.585	650.314	628.234	637.054	958.338	1847.66	691.966	574.977	1292.5	1133.95	1297.61	1240.36	2022.58	1508.89	1605.86	1197.16	1181.15	1003.96	1031.25	780.973	874.01	948.192	1225.22	1250.33	1157.5	786.658	1095.35	-	[M+K]+ 330.242	319	1	0	-	-	-	-	-
716	M369T305	369.24	5.07637	22564.8	19166.3	20365.4	14857.5	16403.6	17387.7	8234.02	9352.61	7912.82	10206.9	7905.08	7977.33	7863.3	7600.75	9089.14	7616.11	6943.99	7403.76	7633.44	9545.66	9215.8	8557.45	11282.7	8911.56	10226.7	10574.2	8781.69	9240.93	9346.83	10998.4	9350.84	11500.3	11271.1	9811.7	8670.63	7805.43	[112][M]+	[M+K]+ 330.278	132	1	0	-	-	-	-	-
717	M369T211	369.263	3.51307	15184.6	16402.9	24690.7	9304.43	8844.9	8967.19	3408.07	1876.16	4833.27	2859.57	3120.55	2968.73	2880.6	2571.14	2510.71	3275.35	1898.91	1535.7	6009.18	7509.38	7779.9	7766.75	9523.39	6571.12	7106.12	7828.67	4681.29	13399.3	11479.7	9890.32	13251.4	9164.73	9634.64	12381.1	10635.6	9713.93	-	-	2415	1	0	-	-	-	-	-
718	M369T67	369.263	1.11213	2310.25	2529.03	2500.86	2928.62	3733.56	3140.08	891.05	1001.95	1245.13	811.549	619.234	749.378	930.155	785.546	1099.53	1226.1	624.22	954.342	2570.53	2138.1	2465.83	1810.38	1513.9	1649.79	2660.19	1981.86	1651.71	1903.16	1427.47	1636.93	2032.85	2376.78	2066.42	2059.82	2108.84	1415.27	-	-	4432	1	0	-	-	-	-	-
719	M369T121	369.264	2.01164	8127.43	3596.3	4180.13	8215.85	4442.89	3339	811.886	1485.18	1794.89	1319.5	871.628	928.664	1427.5	1180.92	1057.27	832.486	798.568	778.235	4016.15	4330.66	7528.64	3762.76	2681.92	2209.15	5207.93	4870.5	6994.85	5329.67	5678.91	8143.07	14934.9	10918.3	7556.61	3756.23	2253.46	3268.3	-	-	4566	1	0	-	-	-	-	-
720	M369T157	369.264	2.61201	1394.22	1830.04	1319.68	2397.18	2060.36	1920.18	902.065	3655.8	4771.48	1350.49	1745.57	1723.87	1441.4	1162.44	2240.92	1770.44	1052.71	786.23	2482.88	2164.87	6497.15	3321.96	3010.58	3102.12	3394.5	4085.28	3681.47	6509.01	7106.81	6138.91	15498.4	6878.56	14729.4	4552.81	4806.13	3649.29	-	-	4439	1	0	-	-	-	-	-
721	M369T299	369.298	4.98935	3661.4	5985.67	3469.95	6880.88	6808.48	5157.1	5275.08	4441.5	4845.54	6456.24	4963.22	4680.49	4967.72	5754.41	2718.23	4197.89	4365.7	4828.51	6684.9	3939.08	6970.9	7694.98	7429.67	8045.78	7630.52	7674.41	6669.81	3102.34	6430.91	6567.51	4267.3	6229.46	5474.98	6882.43	6992.43	6561.35	-	-	3856	0	0	-	-	-	-	-
722	M369T371_1	369.337	6.178	9383.6	4874.51	4597.98	2881.38	4600.53	3934.09	2010.6	3746.32	2346.75	2832.58	1547.38	3061.77	3302.98	2312.28	3493.01	3076.71	2618.35	3099.09	3953.01	2842.22	5068.22	1858.03	5645.91	3194.57	4445.43	1364.19	3522.93	2770	2498.9	3931.34	3343.57	3427.97	3253.38	3186.85	2894.4	2937.99	-	-	2060	0	0	-	-	-	-	-
723	M369T606	369.337	10.1004	11638.5	11139.1	11579	5275.77	5977.48	8324.48	2084.92	2303.96	3910.64	3668.85	1935.99	1916.35	2264.01	2370.33	2984.8	2166.77	1947.29	1462.45	7290.44	8274.59	9955.19	11370.6	13637.5	10653.8	6877.67	9359.22	8891.55	12937.2	4878.84	7172.3	6518.22	6358.38	4993.22	5390.01	3890.75	8847.99	-	-	2463	0	0	-	-	-	-	-
724	M369T442	369.352	7.36856	13474.7	17337.6	20837.9	9775.71	14696.3	11838.1	14159.1	9629.32	11117.9	13035.4	10388	8849.7	16941.4	10479.9	12886.4	9757.96	8216.5	9452.8	8322.3	11906.5	13654.7	9769.63	11679	10350.2	8872.63	8822.11	9197.22	7809.87	10220.4	12071.7	9439.4	7164.33	10388.2	12690.1	15232.1	9858.15	-	-	3332	0	0	-	-	-	-	-
725	M369T839	369.352	13.9848	42033	43869.9	62561.3	64569.9	50259.9	62033.2	51231.1	194463	32911.1	48918.4	46321.7	52872	56355.5	64854.3	56849.9	237163	76174.6	61549.2	55691.6	59090.2	58535.6	58650.1	103725	85885.3	77941.2	86517.3	47563.9	64617.5	69379.7	62231.6	57840.1	51386.3	56902.9	58455.4	51388.7	48098.2	-	-	68	0	0	-	-	-	-	-
726	M369T317	369.352	5.27962	3216.62	4390.22	3820.42	3381.44	4240.55	2907.79	5212.93	3749.9	4918.27	5232	3694.56	3407.18	4649.03	1928.2	3699.92	4230.09	4176.88	4024.8	4454.47	5492.79	5881.71	3682.48	4825.36	5103.27	5627	3926.17	6527.37	3175.5	4866.71	4549.29	4125.63	4639.23	3005.35	4534.82	5041.9	3425.86	-	-	4415	0	0	-	-	-	-	-
727	M369T770	369.352	12.8405	97005.7	89985.2	104317	127236	71757.5	91478.2	75637.2	31113.1	85213	58778.1	14109.3	45656.4	134171	47910.9	54114.1	87014	38225	88173.2	48865	89451.1	165902	57617.3	50190.1	102249	177895	64236.3	165986	27150.4	62977.8	81961.1	76460.7	97240.4	83906.5	43112.5	105537	33351.9	-	-	578	0	0	-	-	-	-	-
728	M369T724	369.352	12.0627	21734.2	21449.6	24844.9	42117.7	20231.2	16995.7	19090.4	17163.2	34262.3	13251.2	17474	22248.8	21263.1	22228.1	16255.7	21905.7	21900.2	20847.2	20733.5	29730.9	20325.4	18587.8	44171.9	17368.3	24686.1	39634.7	15625.3	22125.5	17510.8	16456.8	46633.5	18016.7	20355.1	17281.8	24419.9	17306.2	-	-	1862	0	0	-	-	-	-	-
729	M369T806	369.352	13.4296	51983.8	54442.6	60343.6	52890.3	56213.2	46345.1	69540.6	35863	40643.1	46542.6	23270.7	48316.9	40082.3	69911.3	28402.5	49612.1	33763.5	47761.1	44958.6	36485.5	46844.8	57381	44426.1	65608	72256.8	49442.5	44457	18700.9	37055.7	41992.6	69887.1	45965.7	62713.2	39057.5	57947.1	21325.3	-	-	166	0	0	-	-	-	-	-
730	M369T788	369.352	13.14	49732.2	67696.2	40351.2	61251.4	74379.5	35742.6	63224.5	34943.5	44119.6	36242	21683	35519.8	38482.5	45507.3	60290	58876.2	27860.5	64911.2	52496.8	55925.9	60005.2	54030.9	40581.7	60878.7	58580.8	40395.3	63971.5	30232.9	60680.6	57487.8	69740.9	49352.6	79075.3	34674.8	27152.8	20874.2	-	-	104	0	0	-	-	-	-	-
731	M369T748	369.352	12.4655	161070	113914	122434	107591	191570	209161	93085.1	91369.5	116909	145379	62812.2	116925	144911	134210	141962	119917	94843.7	208795	164272	100440	121748	74090.4	75281.4	134996	135422	64784.2	106641	23185.1	95471.7	113395	100715	358718	199656	55171.1	84960	47178.3	[113][M]+	-	139	0	0	-	-	-	-	-
732	M369T271	369.356	4.51485	12773.6	13525.3	16139	21960.6	14135.2	22308.6	22388.4	20108.8	26259.6	16015	19977.5	13978.8	17155.4	17935.4	19995.6	14719.3	10035.6	12371	13034.6	12143.3	15773	20758	26649.6	26742.7	17765.7	16727.2	17208.6	7582.38	10612.5	10187.5	14593.2	10286.8	12020	10705	6233.68	7723.92	[110][M+1]+	-	3435	0	0	-	-	-	-	-
733	M369T823	369.352	13.7194	49066.5	52424.4	48492.6	40349.6	76324.5	45946.1	59323.3	28605.6	64801.5	50749.9	25284	45284.9	55301.3	59993	52428.7	52304.4	27163.6	52927.4	52378.1	61031.8	78418.5	44024.5	52918.2	74832.3	95186.3	46209.4	57052.8	29783.2	42584	51606.3	56902.7	43046.8	60149.3	54894.5	40860	44051.9	-	-	265	0	0	-	-	-	-	-
734	M369T297	369.384	4.94928	6262.63	11662	7874.16	5665.06	8032.86	7024.57	8142.36	6157.18	6261.53	9958.33	5388.05	6032.5	9973.63	7408.91	5651.84	7180.33	6296.51	6641.59	5455.76	8007.14	10356.1	6172.51	11963	8740.45	14375.7	7029.87	8218.16	7272.72	6753.84	9371.72	6768.94	5678.75	6956.52	6729.92	6527.93	6526.63	-	-	3279	0	0	-	-	-	-	-
735	M369T371_2	369.383	6.17745	1483.23	4296.89	2209.14	2055.31	2247.93	2201.9	2689.79	2079.91	2344	2121.3	2676.66	2403.76	2317.09	2118.32	1729.7	2112.45	1113.4	942.48	2152.47	1453.83	2227.1	2140.32	2551.62	1589.09	2771.79	2703.23	1847.08	2676.57	1623.93	3122.54	2980.44	2740.12	1892.39	2533.64	3720.23	2002.23	-	-	2056	0	0	-	-	-	-	-
736	M369T343	369.429	5.71754	1781.66	2663.12	2339.69	2419.22	1019.36	2147.48	2295.77	2188.11	1947.18	2673.58	2096.73	2127.83	2546.37	2172.5	1905.73	1578.4	2118.17	3036.21	2252.79	1796.2	2288.93	2518.78	2853.34	2635.3	2775.38	2658.9	2447.42	1642	1738.64	2309.38	2325.48	1526.41	2487.78	2327.49	2230.53	2012.42	-	-	3663	0	0	-	-	-	-	-
737	M370T312	370.202	5.19314	4689.68	4750.13	4338.44	3880.08	2832.63	3733.98	3114.59	4279.84	2112.47	2598.27	1983.43	2936.77	2605.15	4393.04	2273.48	2629.18	2262.57	3674.79	5728.06	5841.45	4543.11	5393.62	5853.3	8115.73	5162.9	4266.87	4870.33	5043.48	4060.96	5050.67	3201.92	3702.49	3551.28	3920.58	1370.3	4133.92	[111][M+1]+	-	1447	1	0	-	-	-	-	-
738	M370T304	370.243	5.07005	5910.32	6156.28	5117.36	5158.57	4548.37	3799.78	2518.06	2103.44	1870.19	2772.35	2111.16	1678.31	1746.88	2177.77	2145.84	2826.39	1475.62	2147.02	2786.32	2675.8	1476.56	2170.93	2854.88	3063.31	2946.08	2133.45	2124.82	2450.65	1439.42	2111.69	3012.09	2543.77	1787.45	2499.35	1926.89	1157.88	[112][M+1]+	-	132	0	0	-	-	-	-	-
739	M370T211	370.267	3.52173	4081.93	4008.61	4332.25	2533.45	2352.56	1670.13	580.909	1684.32	890.411	1887.22	1370.4	607.275	2291.35	1449.76	1318.18	2014.99	1319.16	1239.09	2524.06	1661.32	1213.11	1745.85	1247.83	959.81	2079.8	11156.7	1736.69	4159.3	4419.67	2819.58	2016.64	2448.81	3379.13	3645.72	2253.93	3218.35	-	-	477	0	0	-	-	-	-	-
740	M370T274	370.295	4.5608	474304	456247	467806	111697	138535	167551	6752.72	9576.48	20801.5	17684.5	10843.5	13352.1	15427.2	13699.4	15518.8	15670.1	7024.72	10501.8	9575.06	8857.28	4262.72	16169.6	11427	20428.5	13624.1	20330.1	12232.7	10591.1	16820.9	10034.4	11546	16896.6	15722.4	10551.4	9017.13	20619.2	-	-	2768	1	0	-	-	-	-	-
741	M370T210	370.296	3.50428	5569.19	4929.2	5231.69	4134.31	3843.09	3634.41	2200.68	2753.73	3266.11	2123.2	1616.85	1627.16	2503.46	1761.48	1648.11	2322.13	1565.7	1465.84	7243.71	7878.64	8790.37	6277.48	5469.34	4461.67	10383.8	10713.2	6527.92	9983.66	10118.5	6828.04	16855.7	17317.1	16068.5	4964.59	8210.12	7336.73	-	-	2416	1	0	-	-	-	-	-
742	M370T316	370.332	5.26358	13282.9	12943.4	11876.3	49080.9	28722.7	39766.2	32757.4	27726.7	35929.8	32444.7	26594.6	27546.6	26289.9	30666.9	38512.3	26630.8	18501.2	20078.7	29654.4	26766.6	27413.6	13904.4	13787	14619.1	30316.8	32046.5	8992.77	22896.7	28527.7	29568.2	27784.1	26181.4	22204.5	16736.4	14174.4	17210	-	-	4037	0	0	-	-	-	-	-
743	M370T283	370.332	4.71068	3222.37	3873.71	3408.95	9242.37	4676.91	7457.34	3712.73	3893.82	3901.52	4080.93	3712.18	3748.96	3656.35	3206.56	3859.3	4519.96	2629.97	2046.16	5198.17	5153.09	5530.14	5700.6	7706.48	11659.5	5142.24	7850.04	4111.2	5382.55	4114.95	4371.74	5319.57	4869.44	4573.02	3802.3	3474.42	3605.54	-	-	4750	0	0	-	-	-	-	-
744	M370T606	370.341	10.1012	3258.91	3842.53	3588.38	2219.35	2504.47	2926.16	1262.66	1407.83	1900.58	1849.1	1273.62	1396.66	2065.3	1025.5	1501.12	821.939	1194.47	1072.98	2199.89	2225.16	2393.47	3697.3	3760.86	3687.03	2093.07	3810.7	2727.7	3615.28	1620.99	1553.65	2626.92	1396.53	1834.52	1371.19	1245.63	2376.53	-	-	2464	0	0	-	-	-	-	-
745	M370T748	370.355	12.459	61604.8	59809	47473.3	41980.9	39252.1	39658.5	61646.4	32255.5	72668	44846	29296.8	43534.9	71131.1	66039	42114.5	76185.9	53474.8	72722.3	45925	39461.9	40022.3	30483.9	33576.7	43118.1	54776.2	25283.3	98656	7180.76	35513.6	45466.7	30324.2	34325.2	42979.4	16915	30546.8	12908.6	[113][M+1]+	-	2597	0	0	-	-	-	-	-
746	M370T442	370.354	7.37148	6178.07	7868.31	5764.5	4848.49	4009.47	2186.82	3650.07	2907.33	3230.34	3723.85	2601.14	2361.17	4433.7	2879.34	3803.2	3406.1	2700.38	3261.07	2948.56	4261.65	3957.52	3039.25	2242.53	2486.78	3364.08	3330.81	2747.45	2464.48	3282.71	3424.08	3140.48	3574.01	4221.09	3297.97	4922.06	3042.75	-	-	3333	0	0	-	-	-	-	-
747	M370T770	370.355	12.8409	26648.6	48527.4	46445	37805.8	39071	27361.8	37144.4	10004.7	17601.4	23558.9	5559.72	16250.5	20090	32733.7	21594.2	17639.2	9218.78	25187.8	27696.9	56696.9	25325.3	26286.4	29172	24102.3	24734.9	16969.6	31931.3	5554.49	24701.8	43626.2	28031.1	46952.4	59617.9	17531.8	17228.1	6677.41	-	-	585	0	0	-	-	-	-	-
748	M370T293	370.368	4.8867	10059.8	13851.1	15546.2	9297.26	6207.19	11820.3	3645.8	3614.89	3409.14	3299.68	1607.69	2035.13	2897.89	3027.87	3928.58	1939.07	2163.82	3915.27	3850.26	10275	5577.01	15247.6	16254	17052.6	7284	7131.14	8010.02	7216.22	10099.6	8051.08	6543.97	4573.59	6827.97	3940.08	3773	4885.06	-	-	3838	0	0	-	-	-	-	-
749	M370T386	370.368	6.43365	855.204	385.115	441.729	1563.13	1160.71	1389.32	979.693	954.408	1231.65	831.738	1514.49	780.208	1046.81	845.257	585.104	649.406	533.451	373.454	1595.95	2131.36	1605.93	2127.04	2300.45	1755.52	1820.52	1560.26	2173.84	1718.41	1941.64	2058.07	1323.75	1624.1	2648.72	1114.17	2291.13	1887.5	-	-	160	0	0	-	-	-	-	-
750	M371T48	371.147	0.799617	8050.68	2499.14	2910.95	1166.23	1852.92	1522.4	762.421	1407.73	7728.28	6139.36	7205.52	7020.19	7778.33	8259.32	8199.15	8379.96	8788.43	7220.75	886.266	954.396	890.691	1192.47	1313.86	1242.24	5575.94	1376.46	858.094	8356.54	8768.3	9418.56	7376.66	7678.04	8565.2	1040.93	815.743	983.228	-	-	4793	1	0	-	-	-	-	-
751	M371T318	371.162	5.30744	2001.56	1931.31	1920.98	4450.82	2365.21	6038.53	3734.6	4456.79	5208.34	4299.78	4374.35	3898.49	4410.56	3869.98	4786.06	3965.08	4708.17	6796.74	4312.01	3583.24	3472.8	6935.51	4477.45	4740.85	3467.34	4533.42	3816.9	3474.38	2981.53	3120.5	3030.35	3589.67	2643.22	2642.93	6249.83	3859.89	-	-	3545	1	0	-	-	-	-	-
752	M371T241	371.163	4.01896	21484.1	15054.3	23778.9	10027.7	7304.18	8529.12	12233.8	6570.07	26191.4	33903.3	16400.2	23856.2	16295.2	8220.77	17664.2	15701.6	8927.94	10682.2	16872.5	18439.6	24362.9	7580.57	14861.6	16829.6	16304.6	16750.1	15272	17360.7	17256	17021.7	18019.9	11688.1	16866	24725.6	14010.6	16135.7	-	-	2947	1	0	-	-	-	-	-
753	M371T298	371.233	4.96767	3109.2	6562.26	4673.57	5584.47	1827.51	2127.53	4968.47	3958.1	3324.63	5351.33	1203.35	3413.16	3889.68	3803.45	3612	3565.32	4267.63	4044.25	2986.44	3944.37	6438.58	2109.51	6991.38	1631.44	5626.31	2488.01	4931.75	4610.84	4947.81	2704.07	3633.5	4447.85	4643.93	4857.31	1144.92	4996.8	-	-	3856	1	0	-	-	-	-	-
754	M371T170	371.281	2.83703	23463.3	1221.29	24606.2	3955.77	5026.28	25068	23227.6	23500.1	23569.8	22856.7	23828.8	25470.1	24037.7	22629.7	23902.2	25031.5	23368.9	23608.4	7200.48	7655.53	13090.1	5426.72	6306.81	5982.9	6628.68	6508.09	4942.39	8023.62	2288.95	3057.19	5344.96	5185.57	9217.8	23011.9	25094.4	3548.96	-	-	4768	1	0	-	-	-	-	-
755	M371T231	371.28	3.85623	2616.5	3082.52	3003.22	4450.61	5110.46	5220.54	20300.2	1230.31	1812.5	18352.4	1045.42	20451.8	18303	19095	18628.4	19349.2	17397.9	17683.9	7955.34	8914.24	7035.46	11752.2	10929.5	8005.05	10277.2	8046.92	9198.31	13477.6	12181.2	9806.74	25520.5	23634.1	20647.6	9838.64	7124.16	8541.2	[114][M]+	-	2774	1	0	-	-	-	-	-
756	M371T353	371.316	5.87973	168328	230450	164583	155979	223691	158968	254589	178948	148994	207322	155257	155772	222762	163431	164227	159031	161203	161450	161530	158617	201813	157881	206051	165522	210969	144982	161201	162412	167233	212089	157473	166623	160204	157598	207086	163229	[115][M]+	[M+H]+ 370.309	234	1	0	-	-	-	-	-
757	M371T748	371.358	12.4668	5677.33	14321.6	6682.47	6213.75	8497.31	4769.27	6612.99	8658.61	6017.3	9411.94	1304.11	4270.51	6458.24	5502.78	6894.8	5255.92	3620.31	3553.89	4981.96	7206.37	7729.55	3345.39	4828.68	6035.2	6666.61	4438.36	8771.49	843.602	9470.41	7257.23	6474.49	5862.91	4408.23	2668.95	5186.04	2598.71	[113][M+2]+	-	2598	0	0	-	-	-	-	-
758	M371T292	371.367	4.8734	4754.3	5158.02	3739.29	4612.88	4714.23	3814.11	2055.62	1559.86	2080.71	2485.64	3072.3	1997.81	554.19	1973.56	2643.2	1096.99	1795.88	1828.02	2791.63	2785.08	3438.33	7302.42	5223.59	6060.33	3521.92	3109.79	3770.07	2231.22	1984.01	4068.44	4066.09	3127.98	3461.46	1679.4	1804.83	3504.06	-	-	266	1	0	-	-	-	-	-
759	M372T232	372.283	3.8586	573.392	8323.49	5880.33	1952.65	2513.24	6529.36	6570.55	6025.44	5815.48	6665.85	5929.99	6856.5	6033.51	5894.87	5961.6	6665.58	5305.39	5500.91	2186.44	1976.07	2273.26	3551.5	2280.4	2785.92	2626.35	2587.77	2447.3	4169.15	2755.33	2763.6	5480.59	4938.13	5536.15	2504.66	1505.45	2912.06	[114][M+1]+	-	2774	0	0	-	-	-	-	-
760	M372T291	372.311	4.85771	761212	715383	716311	393747	476979	475921	36159.1	25847.4	29960.3	34382.1	31495	29532.2	18729	24047.5	37099.5	26110.3	25366.9	16982.5	200694	217354	201670	371386	386413	410711	238992	267617	270028	172114	171442	213307	198500	199750	187172	125171	92104.3	133277	[116][M]+	-	1545	1	1	MG 18:2	Glycerolipids	MAG	LMGL01010006	LMGL01010000
761	M372T353	372.319	5.88115	42319.7	56609.6	43934	40315.9	57144.1	49207.1	59564.8	40611.1	47736.5	55591.8	43884	39505.7	55730.5	41119.5	42753.3	40403.4	44037.9	47993.8	46607.3	42242.8	56459.7	43374.1	55951.9	45035.5	50422.8	40931.3	38847.7	41094.3	41942.4	52053.1	41588.9	38735.6	42938.6	39736.2	55936.8	39377.1	[115][M+1]+	-	234	0	0	-	-	-	-	-
762	M372T330	372.348	5.50612	8260.84	4944.26	3203.89	17943.8	8797.16	16744.1	7921.91	8556.93	11999.8	8538.59	6900.35	7425.95	11139.1	10316.3	9332.53	7400.17	6787.01	6795.61	8913.23	9394.93	9720.82	9079.46	4720.24	4611.74	9155.21	12461.6	8832.47	8388.84	9303.41	9111.12	6990.35	8026.54	7744.22	5305.65	5622.93	4746.08	[117][M]+	-	4203	1	0	-	-	-	-	-
763	M372T253	372.347	4.21172	7336.3	6518.27	5540.82	16886.3	6263.83	7647.97	6539.15	6275.24	8152.14	19380	4260.39	8375.53	5084.74	5959.75	5660.26	6330.48	4954.94	4861.99	7650.51	9940.88	17475.1	8982.55	11714.1	10671.7	20315.6	5465.01	16845	16496.1	6007.11	9802.31	7907.67	6244.58	8701.57	8743.71	6992.82	7618.24	-	-	1335	1	0	-	-	-	-	-
764	M372T316	372.346	5.26165	9254.89	11464.8	3291.94	7279.61	10431.9	12411.6	11403.8	8424.53	10458	11888.6	6067.92	10138.7	7653.84	7893.31	9124.39	8572.13	6423.98	4814.81	8836.34	6940.46	8518	7575.45	6417.87	9155.09	10364	9548.51	5274.94	3237.44	5705.72	10612.4	6698.77	10853	8811.73	4984.89	9885.22	4774.69	-	-	4052	1	0	-	-	-	-	-
765	M373T58	373.22	0.974275	11547	11194.7	13218.2	3040.88	1977.84	1177.32	2412.43	4316.65	1626.17	1657.55	964.794	801.99	664.939	892.932	838.454	806.359	743.189	606.918	9125.23	10188.7	10138.5	1808.74	2279.21	1501.07	5855.61	6915.23	1031.07	6354.07	3982.44	3871.35	3004.93	2443.41	2897.62	5236.05	2666.2	5891.34	-	-	405	0	0	-	-	-	-	-
766	M373T622	373.273	10.3744	5269.53	3556.31	6705.52	687.536	3308.36	1710.07	1884.93	2286.02	1243.8	1236.2	1679.45	1434.33	2198.13	1659.69	3446.96	1575.65	667.576	1533.01	1663.9	1916.86	2413.23	1597.37	1816.45	1526.75	664.313	1160.56	1146.13	2054.57	1583.34	1149.23	1659.24	1457.88	1207.29	2124.93	1429.39	1296.29	-	-	3375	1	0	-	-	-	-	-
767	M373T202	373.295	3.36277	1052.14	545.776	1265.04	2949.04	2398.43	2554.95	4322.48	5048.15	5926.08	4784.93	3180.08	3377.12	5658.63	3782.35	4476.56	8159.63	2453.29	2502.26	6990.14	7698.93	8164.05	4624.38	4335.22	4321.18	7308.27	5489.1	3595.36	4812.78	2872.74	2107.18	3427.43	4448.13	3944.09	4035.25	4626.11	3673.28	-	-	491	0	0	-	-	-	-	-
768	M373T250	373.295	4.17197	1802.45	1213.46	1410.35	3430.71	2354.1	3006.85	2654.19	4646.51	6894.69	2916.13	2966.35	2751.25	6577.2	4695.81	3124.84	8025.53	3392.29	1888.42	5344.94	6276.34	7117.39	7964.2	5971.36	4749.09	6352.07	6433.72	8370.96	8977.32	8968.81	7579.34	9945.96	8812.89	8614.16	8193.32	7836.79	8069.88	-	-	4066	0	0	-	-	-	-	-
769	M373T308	373.295	5.13812	3656.68	1457.89	4554.62	6037.62	1307.17	2779.2	4472.72	3218.66	3814.53	4199.51	4165	2504.86	6579.17	4357.61	3269.4	6650.01	3895.91	4161.43	2156.39	1392.92	1262.32	9522.82	13394.7	9366.58	5583.96	8262.24	12974.3	2473.44	4874.62	2841.27	2151.77	2206.25	1786.5	2536.24	2693.99	3782.76	-	-	2696	0	0	-	-	-	-	-
770	M373T291	373.315	4.85747	180873	183272	176427	105537	126980	115232	9688.25	6659.09	6610.39	10210.6	8617.08	7461.58	4665.17	6641.98	9600.51	4928.19	4330.72	5577.4	52389.9	58806	52131.7	88396.8	97571.8	104954	59790	67980.2	70389.7	45808.6	40291.6	54905.5	48711.5	54525.6	50929.7	32413.9	23320.8	33659.9	[116][M+1]+	-	1537	0	0	-	-	-	-	-
771	M373T353	373.322	5.87781	8858.2	16927.5	8511.81	8636.95	9434.52	9089.62	9764.56	7990.13	8048.71	9960.61	6989.24	8241.48	9773.04	7993.27	8120.72	6702.21	8768.81	8382.53	6692.74	7669.67	9294.3	7260.84	10914.2	8590.2	11130.4	8521.77	8219.92	7896.18	9078.15	10124.4	8711.16	7682.65	7384.57	7777.51	9377.74	8326.04	[115][M+2]+	-	234	0	0	-	-	-	-	-
772	M373T330	373.35	5.50062	2270.42	2060.3	2324.92	4808.16	3143.79	4290.63	2731.1	1910.74	2656.55	896.768	1748.37	2247.47	3032.12	2400.21	2460.17	2397.74	2378.98	1737.38	2535.74	2485.82	2290.59	1278.77	2382.29	2213.94	2676.82	3277.49	2184.98	1765.78	2811.35	2466.72	2566.56	2400.21	1290.04	1371.49	1831.02	773.854	[117][M+1]+	-	4198	1	0	-	-	-	-	-
773	M374T277	374.303	4.6211	8375.49	7611.48	8382.11	3167.67	6242.81	7383.09	4939.51	6616.04	9058.21	5765.93	6059.07	5790.64	8021.65	7355.32	7223.31	6650.09	5369.8	6794.85	7056.42	7438.31	7415.58	7011.6	4349.4	7033.63	3483.25	5101.24	4833.88	5768.38	6382.31	10818.6	5913.04	6543.84	6290.62	6641.37	11211.8	6848.1	-	-	3030	1	0	-	-	-	-	-
774	M374T292	374.317	4.85882	31313.7	29095.8	28308.5	20103.9	21405	19711	1747.24	2309.75	2631.94	3674.99	1868.6	2442.13	1882.67	2853.64	2399.56	2985.54	2049.49	2018.37	9817.36	10873.9	8795.34	14524.8	16009.1	18560.6	8364.77	12446	15705.4	10526.2	9796.79	5833.45	11234.7	9026.75	11010.8	6845.26	4872.31	6987.78	[116][M+2]+	-	1538	1	1	MG 18:1	Glycerolipids	MAG	LMGL01010005;LMGL01010024;LMGL01010004	LMGL01010000
775	M374T312	374.327	5.19297	127261	128618	127079	217368	149692	201098	197321	223396	233850	220981	189066	191539	213463	181644	192110	221327	174089	121242	168067	181580	179159	227636	239619	239793	208311	185321	220419	154630	178397	126937	109492	123168	115772	117862	111754	137862	[118][M]+	[M+H+NH3]+ 356.293	56	1	1	MG 18:1	Glycerolipids	MAG	LMGL01010005;LMGL01010024;LMGL01010004	LMGL01010000
776	M374T306	374.363	5.10577	2960.36	7283.39	3219.39	5065.42	4887.09	3332.72	3975.11	2227.77	4517.62	3204.51	3230.08	2776	4465.42	3625.08	3361.8	4062.45	2391.42	2856.23	2172.37	1629.21	4188.29	4569.85	5353.78	3082.79	3587.46	1921.96	5843.89	2668.98	3160.99	3671.18	3169	3475.5	2341.71	4941.17	4688.02	1725	-	-	3189	1	0	-	-	-	-	-
777	M374T267	374.363	4.44252	9043.32	3649.71	4899.9	7089.96	3279.98	7535.96	4907.44	8744.12	3695.74	4368.89	6614.3	4475.17	4426.83	5867.77	5910.18	4653.55	6551.8	7173.41	6146.93	3280.99	5640	6553.56	5416.23	7346.99	5296.36	11735.1	7053.09	4915.58	5456.53	3755.37	6144.47	5414.89	6751.96	4948.53	6177.49	5360.62	-	-	1058	1	0	-	-	-	-	-
778	M375T273	375.251	4.5515	1.65335e+06	1.64176e+06	1.75417e+06	562306	667568	720303	14285.4	8909.37	13458.5	22749.1	20564.9	18065	26098.1	22891.1	18094.9	28252.3	10758.3	31761.1	16572	13628.5	13465.4	70669	55317.2	79725.3	18967.1	48156.7	25102.5	35452.7	37390.6	61673.9	47334.2	44532.2	43326.3	16013.7	48678.2	57852.8	-	-	856	1	0	-	-	-	-	-
779	M375T311	375.33	5.18214	29931.4	33375.4	29534.5	60206.1	38539.3	50768.8	49067.9	58374.9	56861.5	57771.4	47074.4	47359.5	55242.8	47121.9	50781	56614.1	42842.2	33318	48676.8	43376.1	48039.3	62703.4	60925.5	66641.5	59314.9	48523.4	62068.7	39406.6	42636	33197.2	26227.5	29573.4	27233.5	29245.8	26431.6	34795.2	[118][M+1]+	-	1419	0	0	-	-	-	-	-
780	M375T335	375.347	5.58341	1690.41	2073.2	1172.2	1350.14	1367.52	1290.71	2044.85	1882.81	987.747	2289.97	1818.69	1392.1	2568.3	1791.33	1643.21	1391.85	1075.56	1395.2	1341.67	1348.25	1618.6	1301.29	1951.06	2168.69	1420.57	1794.16	601.824	1098.16	1449.89	1828.99	2456.52	1683.87	1683.04	1442.48	1508.83	1402.87	-	-	2991	0	0	-	-	-	-	-
781	M376T291	376.075	4.84359	19410.6	15773.7	16369.4	7618.41	12796.4	15770.2	2319.4	1976.8	1509.79	2136.64	2236.01	885.776	1271.67	1751.04	1973.03	1430.59	819.748	869.964	8451.04	8042.42	6809.54	10357.7	7127.83	10083.4	7563.33	8666.29	10947.5	7747.46	6964.49	6571.19	5366.56	9375.94	8175.21	6386.21	2843.27	6544.98	-	-	1555	1	0	-	-	-	-	-
782	M376T279	376.174	4.65128	1844.83	6096.45	4130.83	9516.03	3314.87	4602.14	4061.15	2426.13	1862.46	5421.52	2229.56	3384.33	4429.84	3586.95	3325.62	6088.1	3973.76	3499.85	3951.55	3173.59	5502.38	3237.22	2429.47	6033.65	3959.59	3478.94	2875.27	4328.07	3347.84	4049.64	2448.73	4350.74	2495.57	4317.69	6550.43	1997.51	-	-	3390	1	0	-	-	-	-	-
783	M376T274	376.254	4.56025	400579	396143	405753	168589	182426	198881	4825.24	8841.97	6152.52	17985.9	14534.7	8197.02	5991.09	9080.49	15403.8	10242	6611.37	17048.9	11895.9	4490.48	13083.2	21081.7	18370.4	23426.3	6674.64	24031.8	6629.01	14222.4	21169.1	19016.1	13138.4	17126.5	16989.4	7615.93	13209.3	12360.7	-	-	2769	0	0	-	-	-	-	-
784	M376T258	376.269	4.29234	10816.4	10027.8	5069.32	4729.7	5840.14	4955.91	5759.42	6857.28	6344.65	10543.5	8647.58	8578.66	9413.23	11195.8	4370.41	13178.9	13904.4	9289.09	4083.86	10582.3	22679.7	11633.8	22194.5	4587.96	12083	9809.23	12220	6602.9	5998.73	7695.3	7214.49	4850.13	13632.2	7836.8	6800.57	8562.44	-	-	4812	0	0	-	-	-	-	-
785	M376T371	376.298	6.17585	10760.1	11414.9	11649.6	15684.4	15706	16358.7	21812.9	15780.6	19215.2	25108.6	20904.2	20505.3	22429.1	18182.9	23954.9	27225	23749.5	25435.7	17256.6	17101.4	20083.9	16257.2	18101.9	18212.8	21083.9	14993.6	18368.7	13102.6	18621.2	20080.5	17735.2	15320.3	16866.9	15540.9	16975.7	13744.9	-	[M+K]+ 337.338	2054	0	0	-	-	-	-	-
786	M376T275	376.319	4.59081	14238.6	16442.3	11731.8	6722.61	8172.47	10074.6	5321.43	6270.64	6474.3	6580.73	11412.9	12188.5	21231.7	6808.4	7177.58	10656.4	29300.1	7994.47	4627.78	12123.4	9089.37	5438.48	9535.91	9818.29	15250.7	9109.51	7019.05	7143.26	8943.88	13369.4	7947.88	8271.97	6701.32	6573.65	7797.59	7872.14	-	-	4256	1	0	-	-	-	-	-
787	M376T298	376.318	4.96447	6115.53	7673.44	11436.4	6553.18	12969.2	10989.9	9453.79	10628.2	8239.25	13326.3	8097.31	8716.29	8250.03	8989.58	7899.64	7349.58	9044.44	8283.69	7537.32	10444.4	7736.38	8680.23	15487.3	14394.1	10137.7	9220.66	11371.2	9096.54	7271.01	9204.1	8235.21	9161.87	9130.5	8804.99	9943.91	8501.71	-	-	3280	1	0	-	-	-	-	-
788	M376T312	376.332	5.19334	6026.22	6223.11	5974.89	11679.3	6549.38	9014.94	3881.16	13358.6	10002.9	10305.3	8330.24	7337.55	9897.89	8308.92	9427.05	12191.1	8190.85	8453.81	8910.95	8436.49	9625.57	10794	13573.3	12316.8	10575.4	9584.54	9664.63	8056.1	6579.12	6289.4	6475.54	5226.16	4966.45	5691.63	7431.87	4889.04	[118][M+2]+	-	1434	0	0	-	-	-	-	-
789	M376T336	376.343	5.60002	6318.97	6109.2	6257.67	6711.9	4838.2	5133.13	4765.95	3091.94	3102.9	6071.69	3357.67	3292.32	5004.11	3568.46	4118.5	2460.99	3303.95	2593.72	2700.73	2711.55	3292.39	3655.09	3589.71	4746.33	4170.5	3136.2	4322.57	3150.86	2031.26	3011.06	5962.12	5824.99	5020.36	5209.26	3039.22	3020.57	-	-	2983	1	1	MG 18:0	Glycerolipids	MAG	LMGL01010003	LMGL01010000
790	M376T378	376.378	6.3057	892.349	1904.84	3063.7	1512.64	2542.68	665.596	1799.8	2091.28	1803.94	1546.4	2713.2	1526.88	2888.49	1510.54	1440.93	1470.66	2647.84	1674.46	1820.62	1993.51	1596.56	1651.37	2144.93	2179.18	2309.9	1577.45	1189.89	1807.84	1669.73	2180.22	1557.39	1858.65	1874.33	1204.55	3004.87	1754.69	-	-	4108	0	0	-	-	-	-	-
791	M377T207	377.182	3.44688	717.177	1313.56	1383.22	879.856	819.95	986.436	1259.69	1636.05	594.235	920.969	902.365	731.868	1169.1	937.159	1084.06	812.195	746.734	899.52	1123.72	1143.27	1965.58	1453.27	1154.3	1359.23	1776.89	1225.8	1337.66	1645.22	1361.53	1268.12	2155.23	1601.22	2206.42	1694.5	1228.96	921.043	-	-	2918	1	0	-	-	-	-	-
792	M377T291	377.267	4.84258	2.74043e+06	2.57617e+06	2.31858e+06	1.71476e+06	2.00055e+06	2.16906e+06	309211	230589	228626	313090	295595	217507	178606	197284	273425	194397	160665	192446	1.22059e+06	1.20251e+06	1.26418e+06	1.64034e+06	1.80679e+06	1.79532e+06	1.16148e+06	1.35242e+06	1.50329e+06	1.16061e+06	1.07392e+06	1.31241e+06	1.21135e+06	1.24437e+06	1.15641e+06	952120	694228	907999	[119][M]+	[M+Na]+ 354.278	64	1	0	-	-	-	-	-
793	M377T386	377.282	6.43563	2550.43	2491.76	1290.09	5868.57	3016.54	3318.67	5509.64	4843.96	5994.6	4296.92	8805.41	4859.76	4497.26	3902.55	4831.64	3244.66	4425.28	3732.27	9340.71	7805.01	9590.63	14585.2	13980.2	12107.5	8987.9	8519.9	14662.6	9496.59	8253.2	7724.5	7668.07	8602.35	8609.85	3826.43	5133.24	6420.6	[120][M]+	-	2891	1	0	-	-	-	-	-
794	M377T371	377.301	6.17617	4099.63	4751.66	3961.35	5035.62	6697.72	6938.14	7794.98	7099.4	6393.7	9181.58	8858.25	6804.16	9038.82	7658.98	8751.04	5740	8667.56	11398.4	6432.21	6463.48	7917.63	7107.21	5659.88	6471.71	8911.73	6591.59	5422	6651.12	6586.64	8232.03	6651.22	6926.38	6677.57	7294.18	6236.47	5162.44	-	-	2061	1	0	-	-	-	-	-
795	M377T317	377.303	5.28879	1142.79	951.078	9416.9	8178.03	3845.63	7869.46	5890.04	4739.83	5062.42	3870.72	5817.14	3556.1	5414.47	2814.28	2827.79	3978.61	4047.23	1983.05	8362.07	9120.18	7861.54	14667.1	15354.7	18276.5	7477.02	9271.69	11751.3	5126.11	4646.67	3993.36	2284.88	5211.79	4096.52	2437.89	2509.21	4829.15	-	-	4406	1	0	-	-	-	-	-
796	M377T279	377.326	4.65038	30256	41395.1	22665.6	29220.8	19237	14552.8	18529.1	25697.5	27868.4	29881.7	16062.7	16205.7	31714.2	21100.6	13808.7	24585.6	14970.8	20469.5	8762.16	16019.5	43046.8	30203.4	47246.9	18772.2	39541	31320.5	13358.1	28469.5	14240.7	44614.6	19877.9	19930.7	32338.6	25438.3	45840.5	15853.5	-	-	3391	0	0	-	-	-	-	-
797	M377T472	377.377	7.86554	1187.37	447.808	889.242	5641.46	4316.68	5129.77	5735.91	6731.14	6813.76	5011.89	10116.5	3583.69	4054.33	3285.34	3437.3	3968.45	5901.17	4041.99	7345.79	6704.83	8025.41	14833.9	17007.6	11561.4	6741.98	9971.6	12463.2	10414.6	7153.22	7654.69	6108.65	7670.45	4128.21	3058.98	3027.79	4474.57	-	-	2428	0	0	-	-	-	-	-
798	M378T311	378.084	5.18218	10360.3	1513.54	8138.49	17165.5	8269.76	5660.9	10184.9	11933.1	14111.7	14244.1	6826.85	12555.7	13058.8	11122.3	10363.7	12674.1	10744.5	10127	8722.8	14559.1	11624.3	12018.7	14577.9	15082.3	13693.1	9849.62	14880.8	12182.2	10462.8	8152.01	8604.77	7643.65	7399.9	7386.92	7432.08	8733.72	-	-	1448	0	0	-	-	-	-	-
799	M378T198	378.241	3.29943	908.752	784.996	1145.65	1431.89	856.268	982.736	839.962	999.935	906.163	1651.16	1042.66	934.531	534.093	768.781	893.735	774.189	951.563	453.715	3765.29	4288.73	3953.15	2751.76	2600.51	3191.61	2903.13	2953.16	3622.85	4356.41	1993.48	2045.12	4130.01	3419.12	4067.61	2153.18	1769.12	2060.27	-	[M+K]+ 339.278	385	0	0	-	-	-	-	-
800	M378T291	378.27	4.84258	669886	596521	599857	416151	472025	522618	75105.2	60725.8	54429.5	85618.5	75796.2	55500.4	42106.7	53884	68785.3	49554.3	38299.2	49222	304447	310577	304742	430037	433398	429276	290851	334018	373888	277274	266203	343706	287346	293434	286218	237646	175954	223916	[119][M+1]+	-	64	0	0	-	-	-	-	-
801	M378T386	378.285	6.43792	388.402	0	883.207	2189.65	1949.62	1124.38	1852.94	1422.91	2136.61	1491.23	2426.46	1213.61	1967.44	1233.49	1283.71	1005.96	1126.49	803.502	2310.62	2736.81	2878.87	4261.25	3771.86	3594.87	2322.81	2885.78	3803.12	1592.25	1892.15	2087.84	2045.56	2333.62	2003.65	1219.66	1547.45	1345.45	[120][M+1]+	-	2891	0	0	-	-	-	-	-
802	M378T371	378.298	6.17697	2568.23	3236.16	2062.3	2101.75	3570.6	1387.71	2744.77	1861.98	3781.95	3952.58	3243.72	3409.77	3686.63	3396.94	2837.02	3751.45	3430.99	3577.51	2688.22	1347.55	1864.08	2528.08	3154.7	2582.58	2924	2104.92	2804.99	2470.95	3105.55	2480.95	2114.34	2372.98	2449.39	2569.56	1945.68	3540.56	-	-	2053	1	0	-	-	-	-	-
803	M378T317	378.306	5.28049	2580.88	2423.65	3448.73	3626.6	1597.3	2755.64	2321.06	1518.76	1464.84	2355.38	2522.14	1224.67	2058.02	1509.82	1865.63	1302.39	1453.05	1654.47	3814.03	2743.89	5000.35	4802.33	3888.64	6350.25	3031.02	2065.06	5075.21	2592.44	3049.19	1330.76	2419.07	2039.56	2641.13	2599.17	1818.44	3179.58	-	-	369	0	0	-	-	-	-	-
804	M378T278	378.329	4.63582	5165.95	6987.62	84793	60731.1	111398	3936.35	16646.1	15057.1	5147.71	5712.38	1038.54	8461.18	7270.7	9817.11	6463.14	5843.62	9246.84	7061.45	6041.43	6359.08	43079.1	106899	78124	32250.1	8639.38	6206.52	90645.3	8244.44	8304.61	41851	11049.6	4497.23	5835.72	6009.01	24872.2	31515.2	-	-	3392	1	0	-	-	-	-	-
805	M378T472	378.381	7.86101	0	0	0	1984.34	1855.39	2279.11	1586.87	1326.09	1351.68	468.507	3989.18	929.09	928.191	771.445	1104.35	965.661	1451.8	991.186	561.33	1562.96	2213.14	5039.3	5505.62	3364.53	2470.19	2811.15	3632.95	2649.58	3029.91	1826.81	2724.07	1613.3	1564.38	188.843	2159.75	1733.44	-	-	1376	0	0	-	-	-	-	-
806	M379T311_1	379.085	5.17885	4401.49	5362	4132.27	8242.89	4983.53	2481.45	10424.3	7480.88	7019.03	6045.53	4339.91	4747.78	6083.14	3248.56	2165.81	7781.52	5533.88	4606.28	6079.82	6534.63	6490.94	6642.04	7317.11	9639.63	2517.62	6072.99	5111.59	4786.89	1728.78	3051.71	3440.3	3399.4	2547.92	2190.49	2262.66	3692.72	-	-	1433	1	0	-	-	-	-	-
807	M379T40	379.121	0.671092	725.067	845.016	966.257	433.634	353.467	384.276	2480.07	4951.62	4771.31	555.537	609.894	444.42	872.629	2153.54	2399.57	1646.12	367.29	271.479	821.938	746.786	546.93	4099.17	3617.62	2955.35	1619.72	1735.8	3821.31	985.51	700.54	758.296	587.627	701.479	613.776	2329.57	3469.3	2511.17	-	-	2571	1	0	-	-	-	-	-
808	M379T291	379.273	4.84351	94396.1	99534.5	114606	68375.5	74514.7	81312.4	11183	10784.1	9818.15	13731	13168.6	7868.16	8649.61	9556.93	10889.2	7508.57	6508.31	7648.26	47051.7	50792.9	54851.6	68085.1	70330.3	74340.7	52168.9	50406.3	55695.6	44898	39169.7	55461.8	51261	44589.1	45552.1	37595.3	27685.1	34560.5	[119][M+2]+	-	64	0	0	-	-	-	-	-
809	M379T311_2	379.283	5.17907	1.27142e+06	1.20392e+06	1.12241e+06	1.96346e+06	1.41497e+06	1.68229e+06	1.69316e+06	1.91551e+06	2.08267e+06	1.7398e+06	1.71486e+06	1.808e+06	1.80067e+06	1.6947e+06	1.75213e+06	2.21028e+06	1.62425e+06	1.46262e+06	1.66714e+06	2.04469e+06	1.93777e+06	2.17754e+06	2.30355e+06	2.53621e+06	1.94124e+06	1.77617e+06	1.96511e+06	1.65572e+06	1.53244e+06	1.29883e+06	1.12213e+06	1.24107e+06	1.22602e+06	1.18639e+06	1.23988e+06	1.519e+06	[121][M]+	[M+Na]+ 356.293	56	1	0	-	-	-	-	-
810	M379T300	379.319	4.99713	1848.07	12206	8324.14	2684.69	13208.1	1759.93	2509.74	1096.79	1585.83	11283.6	7216.17	1439.3	14343.2	593.968	6290.13	11651.3	1687.06	1364.61	4900.16	2656.87	10896	4566.46	4968.24	6022.5	1852.07	2878.61	2645.79	4937.76	2572.6	3275.15	4706.77	1817.98	4886.31	1299.85	2372.98	4105.3	-	-	1979	1	0	-	-	-	-	-
811	M379T347	379.32	5.77591	4039.11	5151.88	4175.52	1790.04	4350.66	5123	2944.66	3523.77	1302.85	3702.47	3663.48	3344.79	4564.78	4502.8	5968.56	2419.41	2169.15	5273.23	7666.7	6833.04	948.652	7562.22	7727.77	7444.66	1837.42	6445.54	6960.67	1344.3	934.821	5197.64	8541.92	6178.47	5839.77	3671.41	1779.38	1870.75	-	-	270	1	0	-	-	-	-	-
812	M380T291	380.276	4.84257	14227	16770.7	15541.7	10091.1	12153.1	12925.6	2801.58	4787.75	4035.01	4175.56	4608.24	3899.35	4165.56	4136.34	3890.77	4198.38	3226.07	1878.94	9588.1	9198.25	11370	10890	10692.5	12397.5	10583.3	7807.27	10333.7	7755.8	7632.39	8809.14	8947.54	7728.03	7811.98	6630.4	5375.52	3993.41	[119][M+3]+	-	64	1	1	Acylcarnitine 15:3	Fatty Acyls	AcylCarnitine	-	-
813	M380T311	380.286	5.17898	306060	299677	271332	507528	372227	415757	418552	449970	520106	447695	426850	420364	438151	399502	428497	506266	380963	333901	420111	483816	468266	536846	562066	603589	469862	423421	508147	391865	369634	327458	288907	309735	304413	285808	302654	342227	[121][M+1]+	-	56	1	1	Acylcarnitine 15:3	Fatty Acyls	AcylCarnitine	-	-
814	M380T163	380.316	2.71158	567.319	880.104	809.852	3621.5	1725.8	1063.24	1065.3	2926.02	3202.95	2345.03	1744.63	2103.51	2039.54	2433.03	1978.48	2581.07	1826.54	1102.52	3484.16	4001.73	4114.21	3055.64	3126.47	2893.03	3916.51	5554.44	3286.88	5622.06	4252.67	3913.2	5181.79	5655.46	5389.97	2142.37	1489.7	2228.14	-	-	522	1	0	-	-	-	-	-
815	M380T268	380.337	4.46206	16846.8	13288.9	32975.4	16047.1	29386	20039.1	24043.7	30499.9	13981.7	28582.6	34431.5	17663	33531	25017.8	13542.2	17331	18211.1	33725.9	22756.1	14036.8	18358.8	20885.8	26050.4	23553.8	88525	39326.4	12738	20476.6	17429.1	25896.2	23789	19673.6	39382.8	38313.4	31627.8	35827.9	-	[M+K+NH3]+ 324.348 [M+Na+NH3]+ 340.321 [M+H+NH3]+ 362.303	4454	0	0	-	-	-	-	-
816	M381T41	381.08	0.685058	20097.1	17996	22800.3	9984.9	48961.1	14922.1	472713	593286	523144	56710.6	34901.2	28516.5	131143	374545	174265	233394	10380.5	19662.1	33905.7	52037	34104.8	706114	590466	227462	72685.9	210307	294651	49931.9	40181.6	28225.2	29346.8	30959	38894.4	144302	389459	208772	[122][M]+	-	2476	1	0	-	-	-	-	-
817	M381T999	381.08	16.6495	966.386	1796.17	1255.94	1314.99	1254.94	1571.94	1574.69	1761.01	1247.26	1024.21	745.591	1207.57	1023.96	1832.45	1436.15	1085.53	592.857	1541.26	2307.64	1993.78	1853.97	861.128	1062.41	1041.29	1065.2	1731.3	1109.65	2137.67	2006.81	1148.34	1098.67	1268.08	1963.24	1275.74	1535.22	1457.2	-	-	4781	1	0	-	-	-	-	-
818	M381T258	381.225	4.30662	3819.92	9249.42	3721.25	4370.26	4170.28	3245.67	4392.49	4862.44	4247.27	2663.57	6660.6	5698.12	7783.39	7673.21	4671.08	4446.76	4271.24	4962.03	4334.07	4692.73	4897.63	3057.69	8120.4	6265.15	5863.6	3504.72	5297.78	4312.49	2300.73	2247.7	3028.99	3338.58	3819.47	5989.45	1977.06	2691.1	-	-	4152	1	0	-	-	-	-	-
819	M381T311	381.288	5.17898	50576.5	50865.7	42661.2	82649.5	58771.9	69509.8	69852.6	71520.5	75559.9	76761.2	72850.9	70213.8	75846.3	60203.5	66832.4	75607.6	59411.2	52839.4	73214.9	77327.4	74910.2	86719.5	87358.3	101506	74197.5	60709.5	82896.5	65785.8	68297.2	52566.1	45506.6	49134.8	43512.6	45646.4	47981.5	53733.8	[121][M+2]+	-	56	1	0	-	-	-	-	-
820	M381T336	381.298	5.59836	148204	155137	159464	142982	116818	120210	106687	70998.5	81087.9	134636	91464.5	78956.7	105620	69367.9	89479.6	62837.6	83123.4	68519.2	65916.9	74717.6	74998.3	76413.2	69027.3	69668.4	71158.8	82905.9	89981.5	63334.1	65650	76338.7	135274	93351.6	115537	139063	66071.1	75027.7	[123][M]+	-	169	0	0	-	-	-	-	-
821	M381T269	381.339	4.47598	5117.7	6451.73	5906.14	5359.93	7049.47	5197.49	7187.2	3927.28	2447.86	4917.91	5440.36	4255.91	9525.39	4316.9	1868.83	9027.02	5793.12	6646.13	6141.03	1963.33	9333.39	5877.7	7343.1	4558.94	5430.53	2971.28	3690.3	4694.36	4868.68	5928.02	7078.82	8371.32	4355.98	8038.78	4931.77	5727.93	-	-	4540	0	0	-	-	-	-	-
822	M381T744	381.351	12.3963	18559.4	16004.5	19966.5	3240	4850.53	4855.1	3048.9	4856.93	3433.25	3471.45	13820.2	6071.62	2285.15	1989.45	3578.41	2134.94	7404	2811.65	2931.96	3103.74	3673.34	7104.8	8404.71	7723.86	6660.48	2220.54	2270.78	7577.84	6267.03	3105.89	3002.81	4062.51	3999.9	3816.63	3038.77	2671.41	-	-	625	1	0	-	-	-	-	-
823	M381T386	381.373	6.43495	0	0	1731.47	2065.66	2556.73	2242.65	1463.55	1080.1	1775.13	893.606	2212.5	1309.82	1256.66	1035.97	1024.05	789.337	783.561	1261.68	3183.04	2551.68	3111.98	3653.35	3171.87	4307.63	2329.98	2787.21	2934.06	2839.21	2211.57	1731.03	2262.1	2613.37	1474.02	1466.99	2380.2	1513.25	-	-	2892	0	0	-	-	-	-	-
824	M382T41	382.083	0.685275	3468.41	3518.68	3409.54	1610.66	7317.21	2237.21	76488.6	106039	83968	11079.1	5703.82	4439.75	20341.5	65112.5	27666.1	40251.1	1566.01	3151.44	5542.07	7986.71	5288.09	116224	112378	39749.1	13030	36954.4	51999	8695.76	6418.63	4834.19	4901	5662.74	6124.2	24665	65463.8	37599.6	[122][M+1]+	-	2476	1	0	-	-	-	-	-
825	M382T311	382.291	5.17912	7853.44	8499.64	8215.21	6409.85	8729.72	9788.71	11380.7	13018.8	7622.67	14171.1	10013	9618.94	10125.6	9879.81	10265.3	10648.9	8607.82	8630.15	10552.4	12430.3	9953.94	11461.5	13720.3	15532.9	11963.9	11431.9	9759.72	10535.5	9279.31	9305.4	7585.29	8408.65	9572.55	6434	7508.05	8942.32	[121][M+3]+	-	56	0	0	-	-	-	-	-
826	M382T189	382.294	3.15694	860.142	1016.93	874.47	1093.13	1365.77	1129.04	1310.89	1236.27	1324.34	1134.93	662.688	946.675	1196.04	907.66	887.367	880.286	837.265	1037.03	1848.73	1636.14	1197.95	1191.38	1029.14	1581.61	1398.3	1054.95	1312.59	1397.89	691.092	1381.67	1971.71	846.566	1751.89	709.772	1360.38	1414.84	-	-	4185	1	1	Acylcarnitine 15:2	Fatty Acyls	AcylCarnitine	-	-
827	M382T336	382.301	5.59842	40818.5	38709.1	39233.4	36167.5	29313.8	29539.5	30986.7	18186.6	20271.8	34035.6	22797.4	18199	31507.6	17640.5	22990.4	16199.8	17215.3	17861.9	15917.9	18324	17456.5	17809.9	15628.7	19449.8	17032.7	20118.7	25395.9	15941.5	17151.8	18586.1	33743.8	24780.3	27420.9	32767.5	17445.4	18144.4	[123][M+1]+	-	2985	0	0	-	-	-	-	-
828	M382T166	382.332	2.75871	1191.17	938.381	814.625	7905.21	1391.71	2070.64	5874.6	8446.62	13551.1	8904.35	6261.45	5927.83	9767.17	8844.85	9347.12	8287.56	8075.07	7403.75	18072	17744.9	16796	12342.4	12364.3	13378.7	16612.6	27268.2	11884.9	18042.4	18222.9	18696.9	25362.5	25572.9	24849.2	10225.2	5397.15	9867.07	[124][M]+	-	448	0	0	-	-	-	-	-
829	M382T371	382.379	6.17585	945.693	999.478	464.98	2569	2733.21	2236.52	3155.79	1705.25	2880.4	1490.02	2232.31	2345.79	2715.18	2217.25	1594.27	1461.53	2344.22	1353.89	2250.54	1341.89	2242.51	1475.85	1759.52	1681.22	2805.59	2111.87	2104.02	2190.47	1794.99	2329.37	980.468	2438.15	2152.85	2510.54	2336.35	2661.93	-	-	2062	0	0	-	-	-	-	-
830	M382T469	382.403	7.82043	1832.36	2132.38	2673.85	888.167	1279.88	1242.86	1750.59	1091.9	715.431	1039.08	1163.45	1577.69	1138.41	987.361	949.791	1472.8	969.972	1002.51	1281.86	2237.68	2109.6	1405.74	2476.15	700.682	661.931	665.501	1140.18	885.152	1226.1	1201.68	912.177	1516.26	1466.25	671.208	1710.41	552.911	-	-	2248	0	0	-	-	-	-	-
831	M383T41	383.08	0.685967	2685.26	2254.44	2549.62	1524.41	5143.52	1817.99	54161.5	64550.6	52385.4	5904.78	3756.82	2861.81	12041.4	41819.4	18004.7	27851.2	1021.31	1984.42	3488.74	5120.14	3340.55	78248.5	63042.9	26096.2	8327.78	23644.5	33908.6	5005.15	4044.56	2839.29	3041.18	3473.32	3632.79	17053.5	41828.1	24760.4	[122][M+2]+	-	2476	0	0	-	-	-	-	-
832	M383T297	383.171	4.95773	5756.69	5259.9	5078.42	4526.58	5321.44	7598.88	2923.25	2529.99	3172.06	2725.39	2455.74	1755.24	1560.1	2276.78	2357.82	2374.53	1489.19	2136.56	5607.89	5466.7	5381.46	7682.43	7573.25	7310.93	5239.19	7166.46	5952.17	4138.11	5584.77	6902.68	4151.88	6343.79	5735.51	3393.22	3560.59	3322.7	-	-	201	1	0	-	-	-	-	-
833	M383T1002	383.238	16.702	2639.67	2026.66	2201.2	2498.85	3685	1777.99	4020.59	2026.82	3555.09	1835.77	2255.69	2349.81	1994.58	2945.63	2039.09	2202.75	1983.99	3045.98	2804.97	3385.87	3153.65	2631.05	3034.41	2448.59	1610.97	3539.59	2023.57	3063.28	2839.62	1693.66	2150.76	2050.51	2215.03	1115.16	1649.2	1514.29	-	-	4898	1	0	-	-	-	-	-
834	M383T615	383.28	10.2577	31648.2	32719.1	26072	7430.51	12405.8	17581.3	3479.65	4120.91	1592.03	2316.82	3787.31	2182.62	2225.03	2895.33	2969.62	3266.65	2666.81	461.011	4659.34	2716.95	4520.46	2998.22	5133.89	2822.71	5606.75	4485.63	2549.1	4895.56	3201.97	1944.32	2431.31	2503.53	1997.14	5124.26	2038.1	2750.45	-	-	2502	0	0	-	-	-	-	-
835	M383T336	383.316	5.59836	13811.4	17259.4	12395.2	16504.2	21285.7	13209.3	26556.2	16297.6	16198.7	40985	23936.7	19231.7	58489.2	31713	30861.7	48604.7	37395.2	34196.8	8108.28	8766.57	9985.46	80775.9	108306	82295.8	30188.1	66438.7	86351.4	8865.74	8215.91	11346.5	11836.6	9883.55	9680.68	11938.2	13639.3	10687.1	[123][M+2]+	-	169	0	0	-	-	-	-	-
836	M383T165	383.335	2.75015	685.953	954.03	652.02	2155.23	803.756	825.065	1330.93	3049.84	3719.49	2559.38	2242.51	2081.53	2784.81	2323.37	2470.96	2439.14	2061.44	1657.16	4795.93	5458.49	4588.95	3918.62	2967.13	2876.09	5804.11	7217.99	4060.47	5104.79	6086.46	5345.72	6625.26	6411.51	6793.31	2511.08	1658.89	2865.88	[124][M+1]+	-	448	0	0	-	-	-	-	-
837	M383T319	383.331	5.32383	5085.47	6256.5	8977.68	5647.91	4512.97	3222.68	5545.5	4316.99	4580.28	5665.18	3659.2	3413.23	8389.67	4254.69	4212.09	3357.76	3747.95	4454.51	9427.31	3089.82	5960.39	4445.97	7735.01	4662.88	6524.59	3976.74	3748.99	3170.58	3681.74	4917.62	2922.67	9512.47	4093.44	3341.13	4894.13	2802.64	-	-	4175	1	0	-	-	-	-	-
838	M383T417	383.331	6.95483	6162.9	5696.09	2894.22	4177.17	5742.91	3450.72	6756.51	3658.22	4641.75	6262.71	3844.95	5053.47	4786.42	5735.03	4142.86	4065.16	3548.75	4972.6	5400.8	2999.85	6354.06	6276.3	5827.88	5474.76	4678.84	5934.12	5621.67	6340.6	5303.58	6993.66	4178.14	4016.44	1645.99	4253.88	5403.69	4281.05	-	-	3060	1	0	-	-	-	-	-
839	M383T280	383.339	4.67105	4397.22	4513.31	4290.73	4996.93	2654.66	4023.41	1048.65	2727.04	3474.63	3301.85	2320.83	1609.47	2717.52	2206.27	2188.41	2153.48	1988.69	2264.75	2911.04	2722.55	2767.8	3366.03	5722.64	6066.16	3422.92	3448.69	5317.52	3725.41	3026.37	2733.23	2111.91	1695.12	3073.43	2900.05	2753.02	2853.77	-	-	2624	0	0	-	-	-	-	-
840	M383T609	383.368	10.147	538432	784840	676866	94272.1	176616	335255	11333.5	38241.5	37812.9	56677.5	20842.9	60159.7	10102.8	38086.5	16324.2	13132.6	29873.4	5007.11	34078.6	40048.2	42769	23782.7	30407.2	32716.7	40354	58993.6	23939	66355.9	27197	25770.5	20442.4	15428.9	16450.7	35456.2	14425.3	37451.2	-	-	1845	0	0	-	-	-	-	-
841	M383T365	383.367	6.09034	488016	553057	579617	185483	319969	293889	31183.9	60276	41034.2	25222.6	29930.5	28914.4	26980.8	19713.3	21252.5	15505.2	11381.7	10538.6	40788.2	49824.1	45218.9	63076.1	51555.6	69286.9	42089.7	79212.6	67172.7	28716.4	34266.8	23642.4	24776.6	25526	26478.7	20697.8	21934.8	26548.2	[125][M]+	-	2538	0	0	-	-	-	-	-
842	M383T455	383.368	7.57787	167820	165166	134683	113862	116482	134052	63405.5	71205.9	53719.3	52649.9	67849.8	49634.4	34639.9	45071.6	47909.9	50843.3	45123.7	46019.5	82278.5	98821.8	91815.6	116633	108009	104411	95322.1	116378	102479	109629	103135	104427	92998.9	79102.1	113926	64518.3	78167	82796	[126][M]+	-	1110	0	0	-	-	-	-	-
843	M383T760	383.368	12.6673	288339	360787	331478	41449.3	76812.7	71645.1	12160	40472.9	14455.9	20227.8	71425.8	31773.1	7766.73	5311.45	13257.3	6081.51	30239.6	6040.05	23191.5	29112	20948.8	48348.3	64123.7	51341.8	46178.7	49299.2	14282.6	102160	28348.8	37970.2	28127.9	22532.1	27918	44075.5	11553.5	39612.3	[127][M]+	-	1091	0	0	-	-	-	-	-
844	M384T41	384.083	0.68515	739.474	1130.17	437.849	225.397	564.752	442.624	9024.71	10471.6	9408.61	1040.52	515.775	395.793	2446.07	7699.26	3216.75	4667.81	166.172	313.323	463.497	813.207	578.592	12858.1	12596.1	4144.16	1682.78	4113.15	5291.29	962.262	518.438	515.168	505.697	471.895	493.224	2603	6751.42	4067.2	[122][M+3]+	-	2476	1	0	-	-	-	-	-
845	M384T278	384.311	4.63112	9938.67	8461.03	11221.3	11041.3	8681.49	12246.2	7064.27	6622.78	8503.8	8180.98	7088.39	5340.49	7907.9	6004.12	11141.5	5548.72	4400.91	3959.59	13415.5	13862.1	11600.2	13749.4	12849.3	24278.6	16272.4	10211.9	7645.22	6739.06	12370.4	9170.78	7625.34	10102.2	9640.64	10644.2	6972.6	5932.84	-	-	3393	1	1	Acylcarnitine 15:1	Fatty Acyls	AcylCarnitine	-	-
846	M384T336	384.319	5.5968	3908.79	18584.8	3527.15	5361.55	6591.8	4957.7	9162.61	5434.72	4594.13	12072.9	8520.6	6749.7	16781.8	9402.21	8967.25	15309.2	11249.1	10773.7	10108.2	2335.05	3719.75	23534.1	28694	19212.9	9990.62	17906.2	23886.1	2150.18	2669.1	3625.76	7869.9	3516.38	2529.02	3354.03	4046.18	1676.49	[123][M+3]+	-	169	0	0	-	-	-	-	-
847	M384T333	384.347	5.5473	15731.2	19483.2	23778.2	16197.2	13165.1	17185.3	6968.04	13504	8612.89	10252.4	12135.4	7262	14087.7	9648.74	13732.2	7859.18	6343.63	3932.77	5487.54	6359.07	5489.93	8613.48	6009.25	10896.8	5927.09	8372.55	6034.35	13186	5709.61	6598.49	8274.84	6695.53	11126.2	14277.5	8513.55	10134.9	-	-	4135	0	0	-	-	-	-	-
848	M384T608	384.371	10.1257	382644	257687	142697	31647.8	52856.5	75879.7	3942.38	36171.5	7261.09	15122.5	6400.87	16725	4292.57	9041.58	5763.04	10559.4	6542.83	2238.48	10748	12097	15302	8958.81	10808.4	11150.3	22047.1	34235.6	9350.17	14202.9	8834.37	9763.67	6093.59	5600.46	5679.65	11682.3	5163.07	11770	-	-	2465	0	0	-	-	-	-	-
849	M384T365	384.371	6.08966	154845	169549	185394	54598.8	94475.2	99564.2	10803.4	18562.7	13163.4	7330.04	10312.6	8620.26	8183.37	5939.96	6961.19	5491.18	3420.2	3324.07	11309.4	15115.7	14706.9	18763.2	15436.8	22864.9	14162.8	24407.7	20526.9	9541.64	11680.3	7543.21	8606.11	7883.69	10483.5	7145.3	7511.83	9069.79	[125][M+1]+	-	2533	0	0	-	-	-	-	-
850	M384T455	384.37	7.578	53676	53586	48909	40268.6	34930.4	38310.4	20942.8	25434.2	17278.4	20579	23077.3	18332.6	19822.9	16715.8	15482.3	17799.2	18113.6	16699.8	28398.7	31920.7	29191	39142.9	37014.9	39210.9	31210.8	34559.6	39315.7	34799.1	36245.1	30360.4	31673.3	29529.2	37206	25236.4	26270.4	25398.7	[126][M+1]+	-	1110	0	0	-	-	-	-	-
851	M384T760	384.371	12.6668	102013	112105	97831.6	17807.8	22639.7	24287.3	3434.66	18679.8	5888.64	7780.56	21394.5	10316.9	1441.6	1804.11	8017.01	2195.97	7135.44	2959.59	9430.07	9642.25	9220.82	19080.5	21755.7	16170.2	16734.7	15106.3	6533.9	33025	9512.75	14897.1	7807.81	9180.7	10056.4	13885	6664.12	17279	[127][M+1]+	-	1088	0	0	-	-	-	-	-
852	M384T428	384.384	7.13554	445.106	2228.05	889.833	6141.51	4904.03	9298.99	9788.42	9681.3	11672.8	9974.38	20212.9	10394.3	8593.43	7503.86	8740.53	8954.69	10210.9	6671.31	15902.2	14971.5	11840.5	22813.1	26264.6	16271.8	15925.9	15037.2	19109.1	16524.8	11522.7	11366.5	13778.8	13348.3	11085.4	8918.51	7270.63	11796.8	-	-	889	1	0	-	-	-	-	-
853	M385T269	385.152	4.48385	3171.52	2539.22	2006.13	3091.59	3107.78	2752.54	2313.05	1007.39	4041.82	3113.51	1867.1	1353.31	2575.38	2806.86	1692.24	1665.65	2058.11	2912.9	2159.64	1581.34	5527.37	682.978	2264.59	1754.01	3116.42	1527.99	2335.07	1480.44	4929.98	2196.97	3324.86	3643.92	2019.03	2054	4256.22	1744.85	-	-	392	1	0	-	-	-	-	-
854	M385T255	385.178	4.24343	13455.8	16634.5	10772.4	11082.8	15629.5	14859.6	13168.2	17564.8	16420.5	24858.8	10701.3	17495.7	19136.6	16109.7	11385.4	16728.8	17633.6	12831	20017.2	13755.7	21526.8	18731.8	13409.3	12750.1	27246	6562.98	12298.7	18948.3	19575.7	20377.4	11021.9	21219.1	12996.1	17030.6	30251.7	13189.8	-	-	4101	1	0	-	-	-	-	-
855	M385T318	385.185	5.30797	1581.5	2898.76	3315.15	6702.44	4870.61	5083.05	7388.74	6494.34	6299.29	6775.35	7265.02	5733.43	6890.9	5645.41	5260.75	8662.37	6286.16	5984.55	9116.53	7346.78	6540.15	6931.01	7598.63	7848.77	6914.65	5543.81	7159.9	5669.78	3340.91	5576.19	5563.75	4723.5	3727.02	3391.99	5099.57	4025.05	[128][M]+	[M+H-C4H8]+ 440.222	233	0	0	-	-	-	-	-
856	M385T67	385.258	1.12032	1722.39	1476.24	1389.08	2506.96	2868.77	3491.77	778.425	1121.41	831.337	772.436	516.763	664.935	762.636	622.451	886.401	960.72	542.992	537.676	1782.8	1226.19	1449.74	1344.94	985.285	1356.67	1696.91	1434.47	1190.15	1739.95	1091.12	1301.82	2058.09	1512.82	1477.12	1290.03	1903.14	1259.74	-	[M+H-H20]+ 402.263 [M+H-COCH2]+ 426.26	370	1	0	-	-	-	-	-
857	M385T200	385.258	3.32762	1062.21	1002.83	1072.16	1161.25	4977.28	1428.92	1012.77	1659.47	684.959	1032.85	915.199	911.875	1097.88	1059.39	868.018	1084.52	921.194	986.944	1564.15	1664.77	1923.05	1320.17	1529.26	1365.23	1816.71	1713.06	1939.52	3342.32	2386.2	1404.84	2303.89	2379.45	1216.57	1111.79	2707.28	2028.52	-	-	4886	0	0	-	-	-	-	-
858	M385T175	385.259	2.91965	1162.3	1179	858.805	1788.97	1234.28	1207.65	783.506	946.308	899.856	741.067	1111.44	547.179	899.641	1026.02	1063.13	989.123	932.616	967.432	1199.68	1515.14	1513.29	680.132	1752.09	1117.84	1366.57	1662.69	1486.83	2600.71	1441.99	1353.19	1401.67	3188.83	3111.17	1595.15	4727.2	1485.48	-	-	550	0	0	-	-	-	-	-
859	M385T339	385.331	5.65002	7616.34	8216.59	6733.32	7660.93	8552.66	9354.24	7742.1	4679.05	5446.13	4513.28	5100.69	2955.85	6953.07	6206.51	7639.29	6907.32	6326.99	5011.57	4160.17	5155.46	6671.54	9070.73	14989.6	7337.97	8058.44	6081.91	9435.5	4283.01	3874.11	4185.26	4580.26	5280.14	4930.15	3670.16	4218.64	1914.1	-	-	4700	0	0	-	-	-	-	-
860	M385T427	385.347	7.11417	10243.6	12006.9	9341.93	8366.51	7498.96	9340.56	13911.5	7061.5	9754.3	11114.6	10024.9	8004.89	10562.6	8733.22	12052.1	8368.96	7254.26	6596.09	9244.31	11252.9	9180.44	11312.8	8296.23	9834.51	7994.54	8685.82	11282.7	8348.04	8593.2	12321.6	10544.3	9833.99	8261.88	11292.5	10263.4	9439.67	-	[M+Na]+ 362.365	22	0	0	-	-	-	-	-
861	M385T366	385.346	6.10348	2036.01	3751.66	5518.77	4138.08	2740.23	3318.43	2614.56	2762.66	2090.79	1772.04	1955.35	2235.95	2413.42	2104.29	2453.29	3445.05	2815.94	1418.05	1820.25	2647.14	3325.19	1715.7	2889.51	2672.71	2886.4	2671.05	2559.96	2505.31	3343.29	2615.69	1953.72	3388.9	3310.57	2386.86	3574.51	2269.8	-	-	3459	1	0	-	-	-	-	-
862	M385T365	385.374	6.09008	24523.6	24472.2	30562.7	10117.2	15796.2	14494.5	1792.14	3644.72	2685.58	1934.03	2275.66	1730.94	1566.13	961.896	1284.34	1136.78	1003.06	582.258	2615.93	2517.72	2603.67	3546.33	3059.15	3879.32	3057.33	4265.2	3370.53	1740.75	2225.24	1371.01	1940.74	2582.93	1700.88	824.704	1137.07	1903.93	[125][M+2]+	-	2534	0	0	-	-	-	-	-
863	M385T608	385.374	10.1282	36794.3	32011.5	36499.5	5631.04	10379.6	12545.1	614.479	1344.07	2814.54	3348.68	5246.75	2645.18	755.758	2097.11	4969.3	2186.57	1373.83	426.982	2255.24	1594.99	1858.66	1483.1	2417.66	1728.99	2605.71	3755.75	1170.55	3974.22	1394.79	1875.85	780.242	563.639	1260.96	2075.3	751.997	2296.95	-	-	1834	0	0	-	-	-	-	-
864	M385T455	385.374	7.57775	10947.9	12231.9	7869.59	6188.58	9774.34	9263.89	4035.87	3968.02	3076.52	3640.02	3375.41	5417.04	1816.23	1441.86	3479.3	3548.89	3700.37	5949.9	5980.72	7774.79	5383.32	6883.66	5867.54	6518.58	5877.8	9591.24	5942.56	4891.28	6267.55	7016.47	6581.2	3382.15	9162.11	4394.61	5430.91	3832.06	[126][M+2]+	-	1110	0	0	-	-	-	-	-
865	M385T428	385.387	7.1331	4451.12	3120.47	2224.75	3580.36	2230.13	4514.22	2983.2	4028.8	3527.17	4860.32	6544.55	4716.98	2938.81	2147.91	3858.27	2815.48	4031.51	2247.48	6970.52	6544.15	6570.46	6635.24	10467.2	6823.19	4057.96	5042.17	5999.54	7036.86	2796.27	3976.2	3979.88	5394.66	3726.63	2408.4	3702.18	3206.66	-	-	890	0	0	-	-	-	-	-
866	M386T256	386.182	4.25915	2521.52	2778.12	2591.24	4147.76	3117.99	3042.8	3974.4	2840.52	3144.31	3834.29	4401.29	3395.01	4078.07	4010.65	2613.89	3998.62	2624.26	3362.94	4297.97	3019.81	3652.99	3973.68	4831.29	2807.2	2914.01	4553.19	2240.63	2874.86	4939.51	5596.78	5139.52	5299.01	4773.19	2632.6	3767.25	1795.1	-	-	2936	0	0	-	-	-	-	-
867	M386T318	386.187	5.29952	845.123	2338.24	986.601	2572.06	1484.73	1501.05	1878.9	1084.06	1664.64	1299.55	1355.79	2015.08	1767.53	2017.56	1761.98	1663.35	1507.69	1251.76	1431.75	1833.62	1917.66	1609.82	2726.99	2724.28	1683.25	2189.16	2117	2291.55	1855.25	2191.82	2109.33	1608.4	1603.7	979.387	2591.28	1110.76	[128][M+1]+	-	3531	0	0	-	-	-	-	-
868	M386T285	386.327	4.75015	3936.34	6872.47	3113.94	5017.9	7099.13	6676.72	3283.1	4542.63	3916.25	4381.14	4455.95	2641.75	2839.37	3065.76	4516.12	4114.79	2218.26	2366.59	3487.88	6353	6291.14	2576.65	2723.43	2150.45	3312.69	4702.83	2198.17	3146.51	5375.71	4004.91	2672.41	3421.62	4001.3	2697.01	3121.08	2260.39	-	-	3309	0	0	-	-	-	-	-
869	M386T426	386.35	7.10082	2225.64	3118.59	2674.48	2231	4904.35	4059.23	3828.98	2655.28	2668.26	2937.09	2545.14	2105.49	3517.65	3205.72	3033.33	2802.36	1449.24	2114.81	4313.07	3820.63	3403.84	2907.05	2151.97	4350.33	3480.24	3537.29	3360.52	3340.5	2189.24	6690.54	2805.19	2686.42	3478.8	3174.34	4701.08	3457.7	-	-	22	0	0	-	-	-	-	-
870	M386T350	386.363	5.83442	4974.24	3893.88	3504.81	17840.8	7019.98	13594.7	4564.63	4238.47	4915.41	8463.58	2832.72	3928.25	4481.41	3776.21	4912.49	4845.52	2294.9	3201.55	4673.71	7140.14	4529.16	3504.38	3158.11	2195.6	2893.01	15502.6	1244.22	7638.96	2298.01	5907.35	4436.8	2577.93	3267.3	4989.56	6446.85	5612.82	-	-	101	0	0	-	-	-	-	-
871	M386T349	386.399	5.82437	6616.62	9390.96	4306.04	7470.25	6157.8	3711.27	7561.69	5429.59	6173.93	7952.27	4882.32	4644.89	6730.62	5295.72	5465.51	4538.16	4474.11	4812.22	6274.95	6550.61	6004.33	4647.7	7104.15	4016.06	3241.81	5083.12	4746.4	7371.7	5613.58	7224.21	6252.42	5403.2	5674.45	6288.74	6248.93	5118.65	-	-	2075	1	0	-	-	-	-	-
872	M387T47	387.144	0.781542	3615.22	5346.13	6077.9	4071.57	6791.18	5310.54	1122.18	2118.24	999.002	653.313	748.3	676.414	889.907	1062.23	1119.39	903.077	444.446	591.959	863.07	968.102	1343.93	1318.81	1893.67	1578.81	949.138	1046.78	1416.25	766.967	1198.36	725.078	844.551	969.877	1011	1212.37	1497.84	1705.12	-	-	4034	1	0	-	-	-	-	-
873	M387T297	387.182	4.94706	12624.1	7886.74	7575.63	8987.7	15509.2	9547.43	5262.82	5422.65	10042.2	6595.11	6302.96	6611.58	5035.54	6738.87	5339.02	5667.58	4919.48	5843.5	11258.5	8976.32	8486.14	11900.8	10095.1	15340.4	9021.69	9808.98	10669.2	9793.18	12216.6	22509.7	26643.4	8290.72	17665.7	8245.59	10353.2	11390.6	-	-	3252	1	0	-	-	-	-	-
874	M387T67	387.274	1.12498	721.548	856.12	760.263	881.006	1187.59	1135.53	584.423	361.974	687.96	661.125	618.057	548.716	697.797	561.993	635.832	1219.23	454.433	467.475	1090.27	1171.88	1163.39	974.5	846.09	1152.27	1246.82	1207.28	725.475	767.762	649.039	920.851	1145.51	1334.16	1450.53	1009.57	1021.4	827.97	-	-	4870	1	0	-	-	-	-	-
875	M387T350	387.366	5.82636	2077.76	2299.15	1102.59	2346.34	1796.68	3112.86	1360.9	1012.35	1856.27	1382.79	1036.76	745.247	1058.38	1104.03	2344.26	1276.1	1592.56	1457.91	1588.91	1200.93	1571.83	1221.69	1244.92	714	1513.48	2398.3	1082.92	980.249	1274.08	808.184	1402.59	1042.54	1059.17	2231.66	922.055	1054.89	-	-	2097	1	0	-	-	-	-	-
876	M387T402	387.375	6.69438	8653.5	14448.4	7560.75	10393.4	14690	10590.6	13072.2	9471.15	11014.5	12453.2	9827.02	9196.1	12540.5	10246.1	10359.8	9285.6	9230.34	9113.96	11292.3	11398.7	16232.4	13526.3	13279.9	12606.6	13555.3	10815.4	8101.52	11457	12459.1	15358.5	10834	10847.6	15256.6	11740.2	13195.1	10841.6	-	-	3825	0	0	-	-	-	-	-
877	M388T43	388.254	0.714717	3796.27	3538.79	4133.86	1873.25	1544.67	2777.7	1471.31	1952.07	2049.44	1845.74	1612.84	1348.36	2683.11	1590.74	1730.21	2912.9	1359.34	1188.23	1290.45	1485.12	1761.03	2273.57	2949.59	1365.48	6746.85	1781.25	2416.62	1469.51	1865.63	2152.95	1628.08	1550.03	1553.19	2057.42	2139.26	1939.27	-	-	3223	0	0	-	-	-	-	-
878	M388T233	388.307	3.87905	1581.43	1979.02	1210.35	3718.67	1920.47	4085.56	2469.53	2077.74	1332.34	2790.76	2205.98	2527.05	2491.5	2545.02	2510.97	1926.91	1783.74	2161.99	3095.01	3378.84	3590.98	4943.89	8596.52	3960.19	4898.34	4850.59	4336.88	5612.31	5303.86	4247.52	8100.18	7930.5	8439.93	4038.22	3519.26	3505.23	-	-	4849	1	0	-	-	-	-	-
879	M388T353	388.342	5.88173	10594.6	14313	11327.5	11242.6	16585.6	12453.2	15054.7	10212.4	17581.3	15512.1	11099.4	16759.9	16488.3	12067.3	12126.2	11782.9	13168.4	12178.9	12098.5	10713.2	17170.2	12986.5	15532.2	13908.3	16075.9	11821.8	9692.47	11470.1	12470.9	17233	12545.4	11369.4	10781.4	11571	18420.6	10377.1	[129][M]+	-	3581	1	0	-	-	-	-	-
880	M388T409	388.355	6.8108	0	2672.3	0	1858.91	2122.49	401.909	4352.66	3516.07	4949.29	4666.53	4623.4	2970.61	5003.46	4507.55	3718.02	3933.16	4354.32	4698.93	2876.91	3793.69	2749.21	2338.39	2644.74	3662.01	2400.65	2644.8	5219.94	2948.16	2776.5	4093.57	2672.42	2038.91	2335.48	3693.57	5232.37	3001.32	-	-	4445	1	0	-	-	-	-	-
881	M388T402	388.378	6.69845	890.925	1780.53	3113.06	3771.83	7060.43	4332.22	4583.28	2452.86	2549.19	3690.56	2726.3	3137.72	4351.91	2613.64	2841.98	3233.67	2426.78	2376.89	5236.69	6106.74	3253.84	3012.63	4916.04	4622.61	4860.92	3274.13	4268.77	6639.89	3290.93	5712.08	3098.26	4529.62	4316.09	4255.83	4436.99	3358	-	-	2748	0	0	-	-	-	-	-
882	M389T241	389.112	4.01211	3132.03	2920.57	3092.37	3229.81	3553.33	2512.91	3481.99	3311.31	3195.16	2970.81	2472.06	2833.51	3199.07	3234.18	3130.96	2916.66	4506.58	2795.21	2538.1	2947.37	3077.68	3046.12	2683.14	1688.89	3502.86	3783.5	2175.35	2597.91	3282.37	2521.09	2968.85	2303.91	2914	3391.04	3138.1	2974.98	-	-	2948	0	0	-	-	-	-	-
883	M389T46	389.159	0.763167	3337.78	14312.7	3195.42	1786	2379.01	2680.12	1182.59	935.759	419.891	803.527	564.89	626.889	493.008	1088.87	674.142	574.135	360.412	536.672	830.475	671.656	914.132	1302.62	1305.98	1120.62	833.684	859.38	594.711	538.559	808.482	573.957	693.306	718.059	623.866	789.553	1133.02	822.177	-	-	4026	1	0	-	-	-	-	-
884	M389T319	389.198	5.3084	4298.17	3279.74	4515.03	8186.13	4717.8	6414.72	6763.15	7536.61	8761.68	6668.06	7024.48	6788.99	6261.07	6780.13	6152.15	7479.2	6231.92	5634.79	6717.04	7237.55	6488.76	6544.07	7908.5	8381.16	5425.99	6277.21	6525.37	5653.9	5621.56	5457.81	5386.29	5380.04	4475.86	3798.41	5400.81	5298	[130][M]+	-	3522	1	0	-	-	-	-	-
885	M389T58	389.194	0.964767	18602.8	20469.5	22231.4	1166.69	1517.87	2043.25	677.587	1341.66	604.21	565.044	414.373	288.885	409.553	426.342	338.956	281.679	397.227	392.77	1506.09	1690.48	1512.24	675.026	911.505	555.993	919.707	1221.41	340.134	978.968	608.129	785.479	563.801	508.563	443.668	622.627	620.604	895.072	-	-	4567	1	0	-	-	-	-	-
886	M389T603	389.269	10.0445	63462.2	49337.6	65560.5	7234.1	16837	18337.7	917.287	1834.78	1510.19	2485.98	1359.84	921.177	824.129	971.743	1273.13	1062.11	1204.74	2034.41	5557.03	5825.96	4433.8	4793.1	4076.02	4186.66	3270.85	7155.66	3014.09	3721.7	3532.81	3357.39	2730.89	2427.5	3594.18	2912.86	2231.93	2667.24	-	-	1568	0	0	-	-	-	-	-
887	M389T176	389.289	2.9308	878.727	761.508	792.894	776.889	836.967	1196.71	811.06	609.934	624.62	761.693	619.358	657.209	658.402	701.048	635.553	635.935	580.327	475.562	2654.76	1799.61	2143.98	1416.19	1932.55	2019.03	966.002	2384.46	1184.19	1324.33	1260.5	1067.1	1225.56	1021.44	1260.31	1045.17	1060.28	1642.32	-	-	4895	0	0	-	-	-	-	-
888	M389T333	389.303	5.55517	76176.5	71134.2	75390	20804.8	25106.5	42159.6	1521.12	1358.57	1280.99	1541.43	1097.3	914.64	1645.92	1511.55	1460.51	1168.16	992.293	1097.8	1938.4	1413.1	2156.36	3373.24	3656.78	5410.51	1895.85	3137.04	1989.38	2653.64	1248.87	2269.67	1554.88	1806.44	1150.59	1145.17	1297.57	1609.21	-	-	4136	1	0	-	-	-	-	-
889	M389T428	389.339	7.13713	1779.94	2673.66	444.505	899.139	445.793	1353.62	6466.97	8109.8	7304.17	7899.88	12916.7	8351.02	7625.26	5996.14	5568.94	7169.91	14189.9	6583.76	7634.02	8340.57	10804	10476.6	11544.6	11032.1	10878.7	6208.73	13512.7	8146.95	8716.21	8263.04	7332.5	7381.56	7803.8	5766.43	5752.68	8105.53	-	-	891	1	0	-	-	-	-	-
890	M389T353	389.345	5.87948	5500.95	6316.19	5670.21	4433.98	5959.93	4823.42	4990.81	3748.6	4453.25	5017.4	5411.56	6616.79	4819.65	4066.39	3742.36	2824.62	5810.2	4678.32	2464.01	3263.34	4455.38	3701.93	3298.18	2127.77	6107.58	3315.01	4021.15	3635.34	3746.35	5623.58	4008.16	3626	3614.71	3926.03	5455.98	3410.25	[129][M+1]+	-	3610	0	0	-	-	-	-	-
891	M390T350	390.048	5.83258	5554.56	7339.52	4977.49	7007.79	3992.74	5728.33	7845.61	6057.5	5791.1	7997.71	4919.85	5371.38	5819.22	4854.05	6681.08	6243.23	6740.66	3126.48	6391.96	3752.57	6842.41	6647.3	8361.3	8069.03	8013.06	7412.17	4308.72	7691.05	6773.5	7761.85	7247.77	5420.74	5654.46	4876.93	7591.58	5666.72	-	-	2096	1	0	-	-	-	-	-
892	M390T258	390.109	4.30721	3104.57	4151.8	3421.34	3014.45	2664.6	3230.2	3291.05	3335.05	7305.77	2660.18	2666.82	2114.62	3384.89	3137.43	2646.5	3426.38	2785	2860.63	3601.08	3136.63	3211.54	4984.92	3188.37	2842.02	6379.05	2644.84	1881.36	3156.75	3272.66	4581.78	2943.51	2462.53	3151.11	2463.57	3353.64	5380.06	-	-	4153	1	0	-	-	-	-	-
893	M390T319	390.201	5.30918	910.198	1357.07	1159.73	1834.15	1519.67	1543.2	1695.12	2039.37	1996.44	2541.04	2014.17	1635.14	1606.49	1544	1511.02	2274.82	2360.9	1579.97	1554.53	1346.2	2239.41	2563.23	1657.61	1639.51	823.029	1935.92	1963.6	1765.58	1871.2	1062.31	1999.22	1385.03	1619.49	1543.28	1401.52	1638.04	[130][M+1]+	-	3546	1	0	-	-	-	-	-
894	M390T308	390.321	5.13283	1808.75	2608.54	1923.98	3639.1	2265.52	3331.03	3938.59	3059.86	2479.73	4661.09	2471.88	2688.05	7752.19	4954.94	4886.79	5799.5	7222.27	5539.35	2287.79	2814.76	2340.54	10655.8	13055.7	8854.69	4563.89	8735.91	10513.1	2876.61	1814.1	1609.42	2501.22	1838.79	1794.92	1854.94	2088.69	2676.05	-	-	4647	1	1	DG 18:0; DG(6:0/12:0)	Glycerolipids	DAG	-	LMGL02010000
895	M390T251	390.322	4.18519	1007.53	1181.22	953.639	2795.69	1888.54	2349.05	1471.01	2453.75	3559.47	1812.29	1627.3	1117.05	3401.37	2219.3	1998.84	3557.82	1796.02	1359.04	1997.67	3483.09	2893.3	3324.17	2603.65	2250.03	4419.86	4307.77	3532.64	4115.32	4259.89	3330.01	4858.43	3430.89	4002.07	4245.3	4113.93	3409.16	-	[M+H-C3H2O3]+ 475.316	2587	1	0	-	-	-	-	-
896	M391T346	391.215	5.76395	4864.7	4844.03	2249.47	5209.73	4931.41	1752.28	3930.57	3187.93	4298.21	3359.7	3998.1	2200.18	5105.29	4512.34	4261.65	3619.93	4063.04	3414.63	2717.57	4379.87	4614.2	3914.58	3329.57	3694.12	2493.62	4290	4118.73	3066.45	3502.3	4402.27	3723.71	3889.28	3726.68	5324.18	2928.47	3580.88	-	-	4607	1	0	-	-	-	-	-
897	M391T273	391.225	4.5576	135689	130793	132065	81818.8	81044.3	89261.4	3410	1078.67	6340.46	4874.82	4227.7	4723.71	7377.32	4744.62	3536.49	5910.07	5456.05	5679.75	6436.16	2668.9	3506.92	13971.7	7403.85	17100.4	3076.74	6843.14	9029.51	6822.82	9343.18	11243.1	5909.61	10078.1	10207.7	7208.97	8721.93	7451.81	-	-	859	1	0	-	-	-	-	-
898	M391T208	391.246	3.46273	170841	170571	182980	94007.6	131506	113294	22618.7	47045.8	45015.9	35431.8	31017.4	32100.9	32816.6	28006	43397	41017.8	21372.9	17578.2	81049.5	85534.3	89713.8	90000.7	81997.1	85453.6	80766.8	105453	88456	150327	118778	111638	115306	121181	120087	108217	116812	114356	[131][M]+	[M+Na]+ 368.258	283	1	0	-	-	-	-	-
899	M391T191	391.246	3.18397	6935.08	41377.3	56080.5	30031	34107.5	20490.2	33416.1	31798.7	4972.39	6080.74	29290.6	5555.46	5705.52	5570.72	9684.2	7668.75	7520.57	30400.5	30660.9	9711.2	5843.03	5956.65	29006.9	29851.2	22745.5	14259.8	8012.64	32323.8	14400.4	32176.3	5727.63	11401.8	32603.7	5077.59	31974.9	10905	-	-	397	1	0	-	-	-	-	-
900	M391T349	391.285	5.81956	974496	1.31242e+06	954772	983848	1.39204e+06	936085	1.31002e+06	957687	949706	1.3598e+06	900981	980840	1.32565e+06	951503	967609	1.02812e+06	916479	988955	943736	898592	1.24189e+06	944416	1.26072e+06	993264	1.19213e+06	1.06836e+06	987441	933153	941698	1.31336e+06	963659	920371	939506	917903	1.32726e+06	934600	[132][M]+	-	2076	1	0	-	-	-	-	-
901	M391T296	391.342	4.93827	16765	23376.8	15754.8	17143.2	20672.1	14548.7	21257.1	17292	19546.2	22327.5	17061.7	16193.6	17032.1	18906.9	17157	17029.9	16447.7	17853.6	18183.7	17547.8	23756.5	15596.2	23529	2846.85	28394.5	17808.5	19579	18050	18239.9	24055.1	17371.2	21954.3	19576.2	20132.4	20938.7	20949.9	-	-	3281	0	0	-	-	-	-	-
902	M392T353	391.789	5.88188	702.233	1693.07	1026.03	1753.72	820.959	1068.15	5671.91	15647.9	10563.9	6330.94	4796.41	6770.44	4049.08	5180.07	9644.92	3822.24	1652.05	3264.26	16652.7	13528.8	15276.5	2759.85	3895.5	2173.06	12754.9	8582.94	5088.27	10032.7	10386.6	7059.15	10159.7	11781.6	11354.7	11604.8	19068.1	11318	-	-	3582	0	0	-	-	-	-	-
903	M392T210	392.016	3.50289	1032.72	606.445	946.21	1528.55	1110.72	1374.66	730.4	1793.43	2156.36	533.145	990.76	509.414	1196.97	1180.86	634.94	926.355	436.746	548.872	5757.58	5270.42	5323.5	3885.87	1893.64	2160.5	3541.78	5092.29	2408.09	5283.81	6808.28	2458.3	5247.34	1919.96	9953.25	6453.62	5748.46	4031.67	-	-	2417	1	0	-	-	-	-	-
904	M392T208	392.249	3.46502	47151.4	45859.3	31620.6	27682.3	39111.2	36737.2	5224.79	8451.7	8342.73	6853.17	6818.05	8461.46	6299.98	5781.63	8134.96	9196.27	4677.45	4048.02	19522.7	19423.7	21177.1	24330.8	19980.5	20775.3	20877	25114.2	21309.9	35365.5	30257.6	28160.3	23130.6	32528.9	34597.1	28790.3	27524.8	29728.1	[131][M+1]+	-	283	0	0	-	-	-	-	-
905	M392T349	392.289	5.81975	253854	378929	255896	269429	356364	266364	357164	276173	270177	363093	243348	262074	342309	251291	273350	269037	254669	252824	259121	239253	330003	259698	341993	274055	328889	287834	262735	275184	272272	353340	262146	257443	261588	260077	348489	254247	[132][M+1]+	-	2081	0	0	-	-	-	-	-
906	M392T296	392.346	4.93977	4362.88	21087.5	4252.25	7047.24	5873.4	16913.3	9140.42	3664.49	5088.76	5593.23	6323.28	6504.61	5638.74	6262.77	5223.57	6525.32	6654.19	6823.52	16169.4	8328.12	4644.81	7552.94	12623	15002.6	12512.1	3586.54	5416.8	4440.83	15778	6854.98	6214.56	5887.78	15733.6	6917.74	4989.83	3886.91	-	-	3282	0	0	-	-	-	-	-
907	M392T336	392.374	5.5934	1985.09	1509.94	1731.8	1860.82	2342.13	1981.86	2075.66	1480.74	1523.2	2740.72	2257.82	2193.07	2769.46	2490.99	2310.51	1667.86	1708.28	1466.72	2082.9	2129.49	3004.11	2108.77	3066.96	2726.01	2129.08	1526.68	1995.64	2323.06	1727.83	2050.42	2242.75	2235.56	1734.93	1792.84	2313.07	1437.03	-	-	2992	0	0	-	-	-	-	-
908	M393T297	393.199	4.94957	21926.4	17136.6	20709.9	22623.7	17685.8	19951.3	5391.21	4582.18	5126.2	6551.97	5613.11	4618.8	3817.28	3861.35	3437.87	7075.81	2156.21	3965.92	18984.3	18925.8	18546.9	25451.9	26562.8	25792.5	15134.2	22179.4	24432.6	19565.7	15315.4	19004.3	15402.6	18208.2	17095.3	13400	10809.3	13163.4	[133][M]+	-	3253	1	0	-	-	-	-	-
909	M393T448	393.241	7.47182	67398	69533.3	111653	48002.5	75361.6	99443.2	30024.5	28928.4	37224.9	29541.3	26599.8	24458.3	24215.3	25307.5	44954.5	23373.3	8342.33	12428.7	35229.6	32792.2	27894.8	26509.9	35167.1	36684.5	34564.5	39486.8	28927.5	21608.6	29983.7	22467.1	19024.8	19898.2	22194.5	26490.3	15162.7	16737	[134][M]+	-	32	1	0	-	-	-	-	-
910	M393T424	393.241	7.06092	145963	167672	149619	72244.5	82224.5	121420	6189.47	9488.25	9228.39	13845.7	8760.19	5604.67	7129.79	6073.39	9250.33	8672.46	3109.81	5229.37	33559.5	23563.8	27636.8	38632.9	26520.2	48852	25327.4	35870.1	19540.2	22982	24167.8	21694	22622.2	30734.6	27918.1	20054.6	10225.2	19802.9	[135][M]+	[M+Na]+ 370.242	22	1	0	-	-	-	-	-
911	M393T291	393.241	4.84953	157807	149490	160896	123871	124727	139581	43620	35410.8	31978.3	45024.5	41219.1	31969.9	27205.1	32585.5	45284.8	31470.1	27910	32230.4	108009	105704	106641	128732	123750	129299	100564	102736	116879	91184.2	96358	106339	101812	88548.9	93237.1	85786.8	68494.7	76465.8	[136][M]+	-	1539	1	0	-	-	-	-	-
912	M393T210	393.262	3.49912	118628	89025.4	92465.1	235943	177600	132092	106144	201435	295682	129105	133694	113670	185541	134426	109567	156090	110452	74415.2	772516	805274	747856	530352	501077	439479	701407	863562	538880	745889	830906	601914	1.10808e+06	1.15582e+06	1.12461e+06	683829	598715	516147	[137][M]+	-	2414	1	0	-	-	-	-	-
913	M393T231	393.262	3.85059	28851.1	18531.5	22939.7	34167.2	50252.2	35515.6	16372.2	20153.2	27783.5	15983.3	18419.4	19099.4	17910.3	15967.7	19027.9	21532.2	13980.4	13464.2	90748.6	90520.8	106946	112831	111852	94000.6	91813.8	112594	111390	143492	147190	98077.7	216561	197078	219557	121382	99998.2	110045	[138][M]+	-	2775	1	0	-	-	-	-	-
914	M393T352	393.296	5.87007	133253	139498	123077	104219	129560	149293	133819	104966	101301	132618	99548.2	103014	131600	106209	131152	108404	102663	105449	95046.4	95109.3	123268	96290	124239	95289.1	115597	107189	68872.7	104427	96794.5	135395	96404.4	95156.1	101159	98810	127892	105691	[139][M]+	-	3583	1	0	-	-	-	-	-
915	M393T385	393.334	6.42103	6889.5	7047.12	6077.57	4915.03	6037.87	2615.26	1762.92	9940.65	2662.13	2173.42	2987.84	8486.31	1952.18	9541.43	2655.18	9025.41	1346.07	1428.17	5113.45	5286.21	5420.95	1509.18	2616.85	8791.09	4180.65	2370.18	2634.69	3376.66	4080.73	2804.41	3233.57	3504.41	3455.6	8691.15	2128.57	2311.63	-	-	4818	0	0	-	-	-	-	-
916	M394T297	394.202	4.94957	4109.07	4539.16	6839.62	4327.45	5146.42	5318.7	1887.37	2243.45	2533.51	2291.95	2009.54	1444.53	1872.81	1571.91	1569.66	1660.1	1088.16	1382.48	5191.51	6045.28	4213.66	9153.72	5237.35	7667.3	6107.36	9065.76	5480.43	5002.84	4652.01	4801.87	3891.03	5034.41	5269.97	6765.31	2955.26	6649.64	[133][M+1]+	-	3254	1	0	-	-	-	-	-
917	M394T291	394.244	4.85103	40124.2	38904.9	40870.9	29314	34825.3	34348.7	11522.2	9247.26	7950.13	13049.2	11571.3	8411.37	7459.78	9018.35	10162.8	8494.47	7603.27	8201.45	25730.3	26431.5	29113.2	30722.2	37258	33010	25387.5	28300.2	33365	26648.9	23073.5	32468.6	24498	26010.5	26987.8	20323.5	17338.3	21914.7	[136][M+1]+	-	1525	1	0	-	-	-	-	-
918	M394T448	394.243	7.47448	18496.4	25807.1	29275.1	17215.1	21926.9	24651.9	7575.75	6966.11	10504.9	7503.81	7200.38	5747.12	6622.23	7538.28	13360.2	3910.88	2797.5	3696	7751.5	10201.2	8163.21	10726.1	6664.74	9199.03	9816.29	9807.4	7966.77	5482.82	8275.46	5147.92	5788.74	5027.74	4963.9	6897.07	3263.32	4121.43	[134][M+1]+	-	1039	1	0	-	-	-	-	-
919	M394T424	394.244	7.06013	37069.4	41041.6	34817.1	18312.8	20648.7	27407.9	1829.5	2832.79	4191.61	2621.71	2018.97	2150.5	1922.13	1902.25	2384.21	3526.59	1187.41	1023.11	8359.2	8424.09	5827.08	9234.65	5418.16	15294.5	8510.41	10212.6	5887.97	5842.49	9365.21	6493.34	3909.56	7410.45	8351.84	3581.75	3626.58	4133.23	[135][M+1]+	-	22	1	0	-	-	-	-	-
920	M394T210	394.265	3.49951	28809.6	23682.5	30784.2	62859.2	32763.5	31850.5	28540.7	54205.1	74620.4	35947.9	37930.6	31344.1	45367.2	36043.4	27098.9	41600.4	29367.9	21039.3	191066	207059	200202	136577	128043	116853	183275	228320	153003	213037	226570	147548	271994	297601	296858	179473	158214	146253	[137][M+1]+	-	2414	0	0	-	-	-	-	-
921	M394T231	394.265	3.85047	7974.63	12506.8	8443.18	12456.9	10294.3	8924.61	4450.98	5100.06	5232.19	12143.3	4500.39	4734.81	11077.9	5928.48	5720.53	6559.13	6720.43	5608.24	23978.8	21636.7	27273.1	28601.7	28696.6	23200.7	23855.6	22909.4	24003.6	34771.5	35480.4	26899.1	58293.2	51093.5	57327.6	30415.2	25897.8	30927.1	[138][M+1]+	-	2775	0	0	-	-	-	-	-
922	M394T353	394.301	5.87798	20365.8	27499.1	19538.8	16203.9	23805	18384.4	25648.5	30991.9	20887.7	23557.5	21737.7	30211.6	37145	20572.2	22148	22113.3	23590.9	18935.2	24168.4	21823.6	37670.3	20840.1	15468.2	22910.4	23144.7	20636.8	28816.6	25666	17696.5	37245.9	22382.3	20631.8	22081.5	18029.2	27366.1	20972.3	[139][M+1]+	-	234	0	0	-	-	-	-	-
923	M394T249	394.33	4.14603	15493	23565.3	6462.1	18849	16561.9	10620.2	9234.18	29698.5	13025.6	34822.1	17073.6	13855.4	10251	11510.5	16901.9	26540	12575.4	26552.2	13183	20435.6	16031.1	14933.4	13518.9	17235.3	18946.2	19755.9	18110.3	11444.6	16365.1	15606	16193.5	27283	14414.3	10411.6	12458.2	9107.58	-	-	462	1	0	-	-	-	-	-
924	M394T281	394.353	4.67565	28458.9	54373.3	35978.9	24514.5	21345.2	22338.4	58455.7	40644.8	43959.6	43371.9	20840.2	36908.9	55267.9	24798.6	40496.5	44104.9	44032.7	36959.7	24563.6	23519	39248.5	22080.1	21508.8	40421.2	72778	41880.6	40008.7	44960.3	41397.2	41720.6	39416.2	46166	24061.4	25015.6	20268	22479	-	-	2625	0	0	-	-	-	-	-
925	M395T1000	394.887	16.6712	829.364	704.034	848.512	1101.66	2055.25	822.171	854.975	913.79	1010.53	856.853	929.623	1008.73	745.72	1400.48	927.999	896.594	1148.23	1720.13	1258.42	884.07	501.117	1089.95	1270.94	1155.1	1076.18	1455.62	1026.99	701.27	1238.59	775.831	1282.89	1036.83	1101.62	1082.1	1147.85	1070.62	-	-	4782	0	0	-	-	-	-	-
926	M395T319	395.215	5.30908	11982.9	10726	13278.3	39841.4	21326.5	30774.2	42257	37682.2	45773.9	42229.3	42354.9	36482.4	36964.9	34848.5	38398.3	40587.6	34951.7	36817.3	35065.7	38124	34679.9	40171.6	40225.7	40331	33910.2	36041.4	42797.1	23443	26524.1	24969.4	19085.9	17261.7	19828.5	20243.1	29047.3	22796.3	[140][M]+	-	3525	0	0	-	-	-	-	-
927	M395T291	395.24	4.85342	15919.7	18924.1	18486.8	15862.8	13813.3	14223.9	5472.79	4465.04	3141.92	5727.82	5730.07	3964.68	5290.6	3573.96	7133	3071.18	3736.76	4215.53	11780	14024.2	12311	16015.8	17099.4	15708.8	12868	12976.5	11820.8	9593.5	7960.57	13016.1	11761.6	12847.7	11236.8	9571.26	8413.94	9216.92	[136][M+2]+	-	1540	1	0	-	-	-	-	-
928	M395T312	395.256	5.19304	63201.5	59268.4	65663.3	79483.1	62300.1	70466.2	79342.5	83024.3	84142.1	77306.6	83904.2	87030	86397.7	82954.9	80057.9	95566.3	84819.4	85239.4	79726.7	77417	73834.5	87581.2	81212.7	90871	84533.1	68727.9	76688.2	64366.1	73382.5	63233.6	55131.9	57122.4	56128.3	56908	60626.9	63277.7	[141][M]+	-	1403	1	0	-	-	-	-	-
929	M395T216	395.272	3.60257	6604.12	5492	5205.78	12063	8051.54	6219.82	11709.2	20660.2	30043	11782	17928.8	10068.6	13832	10254.8	16385.7	13286.6	10759.5	5064	34230.6	33939.7	34217.9	26432.1	26791.8	45338.9	29041.5	15640.4	21860	35454	40396.8	13346.6	54043	55147.9	59273.5	29837	25063.1	24697.6	-	-	4531	0	0	-	-	-	-	-
930	M395T250	395.277	4.16105	5680.48	4947.43	4658.45	28169.3	21717.8	23555.6	30571.2	45563.7	81977.2	32318.9	44084	35805.7	67041.2	48055.4	40808	93026.6	41231	16850.7	48742.3	56381.5	46858.4	57803.4	56366.2	41946.9	51155.1	48862.9	50989.7	87644.8	93816.6	59750.7	91337.2	85666.1	91995.3	75280.7	77921.9	77469.4	[142][M]+	-	4071	1	0	-	-	-	-	-
931	M395T306	395.277	5.09209	6310.27	11414.3	14669.7	6157.69	12260.2	21209.6	17558.7	20667.4	23987.3	18417.9	7671.05	4071.68	33465.2	29361.6	6533.83	15820.1	28610.1	20300.9	2841.43	14163.4	9122.34	44038.2	67004.1	35406.7	17687.3	36170.3	48427.2	12096.1	13864.1	4719.63	13301.1	9086.55	9312.55	11321.3	9890.22	13375.5	-	-	254	1	0	-	-	-	-	-
932	M395T353	395.306	5.87781	7502.13	8987.1	8141.14	4612.52	5716.93	6149.46	5219.57	4091.84	5575.58	5381.84	2865.51	3820.03	5985.33	5629.88	6527.72	3631.29	3938.61	4692.21	4803.41	5022.14	8694.85	4468.08	4056.17	4811.01	3402.76	5509.88	4561.53	4332.19	4186.91	5346.48	5602.87	2053.87	4705.44	3759.49	5450.46	6949.15	[139][M+2]+	-	3584	0	0	-	-	-	-	-
933	M395T253	395.332	4.21655	4398.27	2182.22	6306.3	8107.02	22396.3	24461.6	20240.1	5412.45	2446.13	33879.5	8766.81	2873.89	67631.7	4265.94	3474.38	91609.8	41855.3	17966.5	7457.96	3785.04	51111.5	3747.52	57803.9	42911.5	7302.49	7870.48	54402.7	90210.5	2337.14	6552.25	5890.08	90863.4	93377.9	78509.1	3432.18	78105.5	-	-	1336	1	0	-	-	-	-	-
934	M395T279	395.356	4.65552	6956.38	11242.9	11200.4	5519.45	15315	6204.69	12712.9	11631.5	10408.3	9002.94	10581.4	6856.59	6226.37	6014.23	8048.89	5971.92	8801.25	4913.58	8927.45	10647.7	16348.8	6688.9	3234.29	9674.54	35290.6	9612.19	8110.15	9101.66	5379.14	9565.84	8534.43	12733.4	7486.33	6268.87	10125.3	7068.29	-	-	3394	0	0	-	-	-	-	-
935	M395T609	395.368	10.1417	172855	167646	149402	55016	94642.9	72649.5	9209.45	25851.1	14541.3	17346.9	15072.9	12650.1	37205.5	11724.1	24440.8	31343.9	6888.67	5873.61	21848.4	21408.2	24272.8	14197.6	19094.8	16057.8	21124.9	30320.4	12532.2	22356	42618.2	21151.2	9107.29	20337.1	8648.92	19292.9	11854.6	19315.8	-	-	1836	1	0	-	-	-	-	-
936	M395T368	395.368	6.12933	138400	169684	150961	75508.7	121910	122520	30842.2	47287.6	29467.8	27301.6	21831.7	21405.6	19859.4	19381.9	15070.2	11661	11735.1	8824.14	38986	44086.7	46121.8	49497.6	63529.3	57374	41376.6	37505.2	51221.1	29272.7	28504.3	21216.4	17736.6	23603.4	22411.3	16905.8	17910.2	24189.3	[143][M]+	-	184	1	0	-	-	-	-	-
937	M395T458	395.367	7.63577	31170	31680.6	29506.4	43214.5	49496.8	37889.3	36508.1	51658.1	37765.7	35322.2	38688.3	31798.1	21163.4	30571.8	33598.9	25841.4	35264.5	33056.4	50564.1	58247.5	38008.8	55955.7	47904.2	48025.4	53047.4	47156.6	46058	46223.9	45622.3	45505.3	38148.2	33484.3	40325	31645.1	45572.7	38271.3	-	-	4187	1	0	-	-	-	-	-
938	M395T753	395.367	12.5469	148370	139448	137483	17178.4	23189.3	29370.7	5977.01	19728.5	7049.33	10169.3	36978.1	14377.7	4207.91	4151.24	11124	5065.47	15668	3418.45	17137.7	17647.4	15521.7	22642.1	28822.4	27703.6	36432.7	18198.9	3993.16	24968.9	25234.5	20544.5	12651.4	13285.4	14506.6	16026.6	6919.35	12460.4	-	-	599	1	0	-	-	-	-	-
939	M395T443	395.367	7.3847	21219.3	21566.1	26332.1	13660.2	17986.2	16689.2	28937.5	14288.2	29261.6	22756.1	27436.9	17039.9	42117	30308.2	58948.7	22667.6	14691.8	23833.3	14876.2	20293.1	17115.9	20986	14200	10400.7	16110	17600.3	13547.8	12509.7	18653.4	21213	16244.5	17491.2	16508.3	22617.2	29508	19187.2	-	-	1854	1	0	-	-	-	-	-
940	M395T472	395.389	7.86498	5131.49	7410.34	4752.4	25567.9	18865.5	28139.5	31375.9	28746	26553.1	23431.9	48823.1	21670.9	17700.1	15963.6	15014.3	14993.8	29789.5	11729.1	36706	38430	31878.5	69297.6	71531.6	55563.5	37853.8	35810.4	60010.1	67671.6	29939.7	31931.2	32646.4	32796.6	27297.6	15113.5	17032.1	27703.8	-	-	2426	0	0	-	-	-	-	-
941	M396T377	396.127	6.28217	8520.7	10526.1	8788.08	6345.25	5972.52	10349.7	1213.42	3401.13	2514.6	1336.51	1277.36	1658.43	2080.1	1718.32	2494.12	912.733	987.477	1038.62	2480.96	2050.39	3229.11	2456.95	2291.41	3313	2445.46	2796.97	2239.75	1631.73	2068.62	2903.18	3900.71	2224.35	1709.22	1690.46	2920.48	1739.42	-	-	1906	1	0	-	-	-	-	-
942	M396T319	396.218	5.30866	2575.99	2917.97	3634.42	9181.06	5148.28	7215.86	10192.6	9552.16	11084	9047.08	8232.45	9291.33	8914.53	7826.55	10462.6	7908.21	8859.83	8921.57	8289.64	8882.21	7733.13	7368.3	9497.64	10293.9	7753.48	7355.4	8696.77	5541.59	7107.9	6221.54	4598.78	3858.45	5599.45	4863.91	4990.46	6306.05	[140][M+1]+	-	3540	1	0	-	-	-	-	-
943	M396T312	396.26	5.19332	17187.9	18903.4	16070.6	22215.1	17381.2	22208.6	25316.3	23470.7	22658.9	21539.5	23279.6	21800.1	20405.2	18363.9	21264.5	29208.1	21357	17840.8	18977.1	25073.5	20357.9	26666.4	22839.5	27401	20685.7	23161	23830.8	17371	20970.6	17244.6	14608.5	14188.4	15184.4	13710.3	17267.8	16651	[141][M+1]+	-	1401	0	0	-	-	-	-	-
944	M396T262	396.272	4.3729	845.043	917.879	695.999	1019.44	1067.35	1064.74	985.025	2150.37	1594.16	3024.79	4098.83	4241.93	4848.44	2225.44	3691.87	18445.7	13217	17872.9	3400.52	3226.12	3379.49	1595.52	1607.62	2685.37	4374.29	1763.58	2370.12	3497.83	9995.51	4341.9	5911.54	5818.11	6525	1511.04	2363.3	2692.21	-	-	4362	1	0	-	-	-	-	-
945	M396T65	396.272	1.08165	2158.61	2261.45	2636.75	1949.03	2046.73	2216.62	1105.74	1379.73	1717.46	1528.25	851.891	772.205	1473.86	1107.67	1849.02	1097.5	984.292	802.339	1480.54	776.073	1544.79	832.414	625.856	1786.65	1283.15	787.873	1164.03	1477.57	1191.45	1478.15	1186.35	1147.77	1240.08	672.803	1073.27	1113.39	-	-	4227	1	0	-	-	-	-	-
946	M396T212	396.272	3.53344	1604.15	1653.21	1715.31	3698.08	2050.28	3530.68	2156.9	1828.12	4064.91	5484.51	2606.25	2521.01	3419.25	2300.5	3642.26	824.773	2028.98	1758.77	8125.39	12699.7	7705.14	6543.41	7029.83	7995.12	5068.45	5675.54	3758.11	5307.28	6152.95	5020.99	7564.06	7824.65	10445	6636.77	4329.92	5366.66	-	-	477	1	0	-	-	-	-	-
947	M396T250	396.28	4.1643	1745.29	1599.63	1391.71	7158.08	6095.21	5866.92	5272.85	11822.2	19895	8153.75	11759.2	10313.8	17899.7	12525.8	10668.9	22697.5	10932.5	4528.26	12834.8	15905.3	13553.2	16069.8	14253.4	11948	16416.4	13391.4	14048	25180.5	26341.4	16598.9	20736.9	22790	23183.2	23160.7	22915.6	18766	[142][M+1]+	-	4070	0	0	-	-	-	-	-
948	M396T307	396.28	5.11251	12235.9	7370.86	3104.84	12414.6	4613.9	13862.6	6915.3	2710	9876.79	6401.71	15762.2	16815.2	8440.74	11141	11559.7	19882.1	6919.16	9334.6	10037.2	10333.6	3061.91	11851.2	21801.9	12962	7593.94	9229.84	12998.5	9453.39	10175.1	6921.01	1667.93	5977.49	6558.88	6674.18	2754.59	8818.9	-	-	3190	0	0	-	-	-	-	-
949	M396T110	396.311	1.83402	408.174	721.902	528.024	3383.41	800.086	563.243	888.871	3644.63	4145.75	2675.49	2463.33	3202.69	2097.99	2866.16	2872.55	2636.53	2812.12	1262.76	4038.62	4537.48	4609.99	3481.81	4095.89	4178.51	4567.8	6152.41	3430.43	7309.39	6234.26	6136.96	8040.99	7409.68	7329.96	2601.28	2957.39	3353.76	[144][M]+	-	502	1	1	Acylcarnitine 16:2	Fatty Acyls	AcylCarnitine	LMFA07070021	-
950	M396T289	396.347	4.81628	3781.02	2507.83	3126.94	9022.08	3777.51	4871.56	4489.44	2707.12	4364.42	7299.67	8000.8	5966.41	7342.2	4431.29	5046.8	6488.47	3261.64	2296.34	4921.47	4487.59	3822.82	6238.83	5191.07	5472.42	4760.47	3767.06	5491.71	2558.22	3582.99	4247.78	2587.03	3500.98	2608.93	3306.05	3262.38	3299.8	-	-	167	0	0	-	-	-	-	-
951	M396T610	396.371	10.1613	58195.3	61039.8	51004.6	12146	33446.3	27665.6	3829.01	8886.54	7249.98	9470.75	14180.1	3621.86	10704	2915.3	20302.6	11359.7	4928	5282.91	7528.91	8848.66	8743.38	4876.23	6935.28	6216.32	13326.2	11763.3	9877.47	7215.43	4716.13	4412.34	3062.4	2325.73	5730.62	9025.99	4651.59	7265.7	-	-	2803	0	0	-	-	-	-	-
952	M396T368	396.371	6.13252	53850.3	51556.1	50233.8	28907.1	46974.2	37068.9	12841.2	17083.3	11541.6	9026.52	7506.18	7531.09	7332.96	6091.08	5341.11	5070.46	3936	2482.2	12093.6	15164	16942	15667.8	19255.7	19990.2	14614.9	13072.6	18765.5	8962	10858	8213.7	8447.66	8900.47	9377.78	5643.92	7021.94	8312.19	[143][M+1]+	-	184	0	0	-	-	-	-	-
953	M396T458	396.371	7.63033	11286.2	14575.1	11206.3	16766.3	14415.8	14783	15656.2	17080.3	13797.2	12608.5	18281.1	12832.6	8512.97	11280.1	13441.1	7406.47	6025.2	11415.6	16684.5	19846.9	17685.8	20171.6	15842.5	19704.5	15094.6	14991.2	13715.1	16014.3	21282.6	14420.2	10654.7	12405.1	14145.6	13131.2	12403.7	14724	-	-	2017	0	0	-	-	-	-	-
954	M396T472	396.392	7.86554	2772.57	4339.44	2393.62	7602.07	8826.53	8661.32	10546	9421.67	10130.7	7952.87	17254.9	8511.93	5506.25	4379.77	4804.75	4619.71	7383.7	6313.86	10234.7	11630.2	12878.2	19671.6	22898.9	22821.6	15808.5	13745.6	21989.4	18867.4	13043.3	11163.3	9932.07	7786.01	8468.99	5386.09	5736.46	9610.7	-	-	124	0	0	-	-	-	-	-
955	M397T318	397.22	5.30752	652	715.592	1006.62	1631.63	581.49	1496.46	1583.9	1516.02	1837.44	1421.85	1885.27	2009.06	1728.7	1423.04	1555.59	1879.9	1536.88	1775.55	1879.38	1263.15	1655.55	1912.92	1569.98	1683.81	1235.75	2254.18	1327.07	1161.84	1471.04	1650.55	1459.07	732.805	1576.03	1214.55	1322.46	1766.37	[140][M+2]+	-	3528	1	0	-	-	-	-	-
956	M397T345	397.231	5.75513	5529.12	4572.92	5029.54	5788.52	6124.52	5428.37	6545.6	5648.57	6375.92	8691.6	6872	6962.94	9364.42	7659.72	7044.09	7271.69	6125.16	6430.11	9420.68	10492.6	12513.2	9549.58	13901.2	13312.1	7560.76	8483.21	11444.9	5925.1	8367.16	7968.46	6827.12	5857.2	6666.8	5937.87	7137.87	6047.04	[145][M]+	-	4605	0	0	-	-	-	-	-
957	M397T312	397.256	5.19314	6276.14	7745.93	6808.55	9887.08	10477.1	9942.25	10791.5	10629.4	6008.31	8212.14	11833	12015.5	10508.2	9227.98	9931.44	11606.5	10244.9	7841.27	9363.12	9965.77	11829.9	10308.6	13413.3	11888.9	11631.6	7841.1	7449.97	6689.59	9054.61	8555.4	6646.65	7762.33	5806.92	6401.21	7585.67	6910.82	[141][M+2]+	-	1402	0	0	-	-	-	-	-
958	M397T336	397.272	5.59842	13503.6	14136.7	13976.4	14183.8	10847.2	11604.5	11357.8	7657.11	9327.03	13274.9	11199.1	8218.48	11605.1	8542.74	11280.4	7541.86	8842.11	8704.79	6330.45	8060.96	6498.54	5450.19	6346.75	7403.01	6251.73	7961.84	7088.34	4658.27	6797.53	8202.94	12143.9	8489.01	9273.91	10920.7	6165.5	8135.41	[146][M]+	-	2975	1	0	-	-	-	-	-
959	M397T251	397.278	4.18402	2916.44	4152.43	3377.44	2843.56	5006.76	4458.64	5097.87	1614.75	3506.94	4745.67	1553.04	3960.76	5180.23	3934.87	4368.26	3467.3	4167.12	4239.23	4106.19	981.418	6606.72	2539.31	7242.91	6056.3	7039.29	5919.68	5734.19	3927.31	4640.94	1962.09	4587.93	8130.2	4166.7	2890.27	6773.37	3477.69	-	-	2587	0	0	-	-	-	-	-
960	M397T110	397.315	1.83167	379.081	492.488	388.513	1188.7	481.648	387.339	629.822	1293.01	1547.77	722.952	1017.7	1069.62	927.79	895.33	916.865	748.216	1078.23	589.888	1212.02	1342.03	1056.39	1047.01	1278.11	1066.44	1556.09	1822.62	919.122	2643.84	1937.25	1769.18	2526.37	2395.85	2287.31	802.521	1215.78	864.896	[144][M+1]+	-	502	0	0	-	-	-	-	-
961	M397T804	397.367	13.4057	5840.05	6502.01	7230.61	2404.88	4128.18	4802.26	1996.43	16871.6	4588.81	5662.58	58236.1	12503	2861.72	1618.62	6414.74	2963.43	17295.1	1836.69	2028.93	2804.6	3637.26	11274.9	10907.8	2986	3992.06	13966.6	3465.12	36907.8	5989.28	3473.73	3788.54	2723.56	3112.22	21745	8571.06	15094.2	-	[M+2H-C5H8O4]2+ 924.8	237	0	0	-	-	-	-	-
962	M397T618	397.384	10.2987	2.16912e+06	2.02667e+06	2.11838e+06	383725	604939	1.01016e+06	64786.4	141676	150833	245593	114518	60493.5	66016.3	56035.1	141321	72859.6	114463	25484	191235	180855	364106	126551	247054	156765	201155	663780	96360.6	179684	153222	134678	141495	117839	119533	230441	108604	193693	[147][M]+	-	1813	0	0	-	-	-	-	-
963	M397T377	397.384	6.28237	1.43393e+06	1.48671e+06	1.59535e+06	715936	897928	1.29718e+06	268941	308906	290529	210866	220059	171112	224731	199157	229720	128942	75781.5	84199.3	350766	372314	302717	330086	412863	454766	317458	433921	368854	284829	223370	275267	260200	239364	237674	217377	186403	246594	[148][M]+	-	1898	0	0	-	-	-	-	-
964	M397T470	397.384	7.83144	413353	350198	386058	270295	278806	315758	217453	243316	200935	177856	204130	178806	165285	182081	221875	154481	142310	182872	233385	223959	229687	225092	240201	232309	229920	257304	223174	247818	230588	211663	219999	206721	230252	208729	203199	204757	[149][M]+	-	2242	0	0	-	-	-	-	-
965	M397T603	397.383	10.0526	1.67601e+06	2.0685e+06	1.87275e+06	282411	694458	672507	13914.5	45273	14270.7	21073.7	19889.8	10230.7	7510.12	10212.6	19513.6	6710.98	5735.71	8052.9	114630	106161	144397	118561	109118	123370	125539	190870	72919.3	110873	65494.4	75562.3	98201.4	85068.7	81888	93283.9	35435.4	71361.1	[150][M]+	-	1570	0	0	-	-	-	-	-
966	M397T767	397.384	12.7853	799366	867054	862992	65688.4	125464	104462	18232	20444.9	15737	10241.3	12852.2	7105.88	7316.91	7879.36	12359	10106.7	19527.7	12576.2	50366.9	49230.5	43694.1	87410.7	123765	120868	86560.4	71004.9	35742	84587	71103.5	82819.5	52353.5	58684.6	42213.9	48898.8	26187.8	54710.4	-	-	572	0	0	-	-	-	-	-
967	M397T783	397.383	13.0512	306971	320967	310065	55122	101050	106936	19230.7	49748.3	27234.1	25836.6	61435.4	31792.5	14957.5	11890	30301.2	15060	26045.3	12927.4	15497.5	16513.8	15341.9	39414.1	46871	25446	33654.6	40472.3	18127	75695.8	24660.5	23931.5	15108.3	17151.8	13798.8	31991.8	16504.2	29672.5	-	-	657	0	0	-	-	-	-	-
968	M397T695	397.383	11.5916	35817.5	34338.2	33572.4	6983.02	12451.2	15132.9	1389.74	4511.17	3627.77	2158.32	9293.72	2262.12	833.425	1006.24	2785.28	1182.81	2545.26	951.121	4240.8	3693.27	2636.96	8894.67	8434.91	4516.34	6255.96	5789	2531.61	24043.6	4435.43	3736.46	2822.6	4691.94	3684.92	9350.15	4271.4	9059.4	-	-	1747	0	0	-	-	-	-	-
969	M398T345	398.233	5.75829	1130.59	1838.59	1252.1	1258.91	1312	1789.87	1311.02	1469.19	2163.23	2011.09	1928.03	1244.4	2868.12	1582.94	1616.79	2099.82	2441.67	1355	2477.83	2930.22	2304.75	2294.51	3664.68	2826.31	1666.07	2686.7	3702.23	1524.78	1967.94	2516.56	1873.39	1333	1429.56	1264.03	2799.93	1796.85	[145][M+1]+	-	4605	1	0	-	-	-	-	-
970	M398T336	398.275	5.59913	3288.62	3486.64	2825.85	3071.37	3082.06	2417.35	3403.96	1902.45	1666.19	3398.74	3325.61	2025.97	2677.88	2125.77	2686.13	2317.96	2148.69	1838.54	1706.61	2147.39	2294.77	3153.32	3811.97	2291.88	3254.82	3694.2	2613.4	1430.55	1543.97	2657.54	4555.06	2339.36	2670.63	3073.9	1255.15	1701.02	[146][M+1]+	-	2975	0	0	-	-	-	-	-
971	M398T68	398.327	1.14112	1177.05	981.9	1121.9	4692	1517.71	1631.32	1277.28	4146.72	6154.96	3341.33	2698.87	2987.45	3960.25	4293.14	3350.25	4068.98	3061.77	1382.92	7585.64	6244.51	7602.58	5356.28	4489.97	4424.98	8427.95	11422	5320.22	9393.3	8356.9	7380.94	11117.4	13498.7	10624.3	4252.55	3464.62	4371.8	[151][M]+	-	445	1	1	Acylcarnitine 16:1	Fatty Acyls	AcylCarnitine	LMFA07070097;LMFA07070109	-
972	M398T94	398.327	1.57023	530.614	506.198	536.484	3384.25	781.078	532.827	1039.62	3242.58	4863.04	2563.43	2221.89	2605.94	3463.7	3363.26	2379.24	3118.27	2988.4	1246.16	6173.65	6649.3	5606.83	3441.48	3823.59	3074.42	4912.29	8000.09	3959.37	7024.75	6473.39	6042.13	9197.94	10345.1	10483	3272.53	2794.74	3547.36	-	-	503	1	1	Acylcarnitine 16:1	Fatty Acyls	AcylCarnitine	LMFA07070097;LMFA07070109	-
973	M398T343	398.363	5.71637	4037.33	5251.88	4305.15	70249.3	29637.4	44019.3	36061	59159.1	48709	38591.4	51109.8	23138.2	18506.9	19252.6	26061	44353.4	36107.8	12949.3	68844.3	67818.9	74872.3	66055.5	41317.4	38098	136990	85711.3	34655.5	135243	138291	85725.4	179063	167208	155862	113052	82185.9	90263	[152][M]+	-	3658	0	0	-	-	-	-	-
974	M398T470	398.387	7.83241	150918	116553	126842	91882	87609.2	96624	80326.3	79754.9	65615.5	56736.4	67127.8	60926.3	60723.6	55471.9	70759.7	49775.8	50708.7	63332.1	80040.1	74608.2	77649	74985.1	86352.9	83995.5	75989.6	92416.7	78795.8	75318.2	79596.1	71626.1	76086.4	69860.3	78645.1	74750.8	70525.5	64662.9	[149][M+1]+	-	2242	0	0	-	-	-	-	-
975	M398T767	398.387	12.7856	248568	272046	301916	22513.8	39450.4	41063.3	5329.48	7846.21	5580.03	2242.37	5997.69	2238.65	3309.26	1495.32	4522.56	1937.43	2206.97	2121.67	20596.1	24555.3	17029.7	34167.5	44411.7	41204.9	32403	27072.9	13977.8	32499.9	25728.6	26002.2	24450.6	21558.7	13294.1	21784.4	11247.7	15563.5	-	-	49	0	0	-	-	-	-	-
976	M398T603	398.387	10.0522	570261	664808	591930	102277	224050	218567	4954.86	13696.7	3990.82	7947.95	5668.53	3331.52	1650.89	3169.27	5593.13	2468.15	2253.12	2911.13	35962.3	36520.3	45232.7	36691.2	35255.2	39538.6	41517.9	64291.1	24509.5	38717.7	19863.8	28278.7	31844.5	30080.3	26256.3	29520.6	13236.5	25407.5	[150][M+1]+	-	1569	0	0	-	-	-	-	-
977	M398T618	398.387	10.3031	713793	864767	656799	123524	210312	332919	20579.7	49001.6	50850.5	83272	39078.1	21566.7	105916	58425.4	160362	23113.2	24476.7	8594.2	60444.7	63553.1	118940	43763.4	82401.9	48655.5	67310.6	82039.1	32404.8	56044.2	50483.2	42165.6	65232	37165.3	38121.8	76638.1	41240.1	63802.5	[147][M+1]+	-	1814	0	0	-	-	-	-	-
978	M398T377	398.387	6.28377	477206	493114	524065	247215	307930	389086	85252.2	105407	92952.9	67237.1	74957.8	59008.1	68894.4	65722.6	73908.6	41617.2	25529.7	28521	121089	118185	102244	106998	147748	150922	113719	146161	118694	94377.5	84807.7	91398.5	94740	78519.5	80471.4	70269.1	69075.1	81279.8	[148][M+1]+	-	1897	0	0	-	-	-	-	-
979	M398T783	398.387	13.0545	100354	108204	105031	19402.4	34920.2	37044.5	6008.82	16435.3	9169.46	9763.67	25827.4	7461.84	3893.24	4340.1	14109.6	5010.23	11100.8	4565.52	4212.01	5783.12	4944.92	13082.9	13861	10537.1	11550.6	13583.9	3816.1	28937.9	6657.95	7411.45	4174.51	3748.43	4501.14	9074.02	3772.04	13087.6	-	-	658	0	0	-	-	-	-	-
980	M399T45	399.142	0.757867	2604.88	2784.44	1640.75	1147.59	1165.22	421.545	666.752	757.09	853.409	583.979	471.357	542.776	427.081	875.346	767.542	497.627	362.473	371.684	1506.73	1392.98	1312.39	1599.43	1440.58	1216.83	1240.03	1017.75	721.875	1288.44	1310.13	859.015	686.196	819.746	1203.95	912.029	972.135	814.647	-	-	4703	1	0	-	-	-	-	-
981	M399T207	399.165	3.45217	1142.12	1561.63	1544.88	2255.19	1531.12	1760.74	1042.26	1122.69	1595.48	1427.78	3402.78	1217.79	1800.48	874.886	1088.42	1912.8	908.758	1264.88	2928.94	2591.14	2278.53	2221.82	1784.89	1870.7	2975.23	2803.48	2683.38	3605.53	3691.08	2339.45	3135.96	3960.66	2359.44	2019.84	2829.82	2357.2	-	-	2919	1	0	-	-	-	-	-
982	M399T236	399.251	3.93422	14263.4	67373.5	15911.8	15312.9	62254.2	37163.2	30103.6	22615.3	18549.5	64454.5	45654.8	16560.5	74627.4	32005.4	29476.1	46254.6	21533.1	51111.1	17419.7	32895.7	30248.1	24454.8	18727.4	54778.3	23802.6	31736.4	43753.9	10928.3	30540.3	71741	26709.2	24227.4	14127	19255.5	71766.7	27714.6	-	-	320	1	0	-	-	-	-	-
983	M399T336	399.266	5.6029	6466.57	8011.13	6408.14	5769.15	8351.5	6885.22	9317.8	6576.5	6732.66	9896.3	6141.08	6612.84	8587.73	6395.23	7012.4	5983.67	5270.62	5841.3	6348.88	4707.7	8704.67	4880.15	8751.55	7038.15	9995.15	6748.36	5834.86	5368.8	6605.1	8686.91	7870.92	6530.46	6183.82	5895.32	8191.54	5141.46	[146][M+2]+	-	2975	1	0	-	-	-	-	-
984	M399T318	399.285	5.30023	5045.42	6113.62	6041.49	4847.1	3812.74	7911	1941.64	1412.2	3384.35	2757.73	1859.61	1230.65	1871.19	2735.43	2811.71	1316.68	2361.5	2963.53	4404.22	3022.96	3432.42	3751.51	6152.36	4666.15	3191.69	3229.7	5126	1667.3	2956.85	3902.98	3374.56	1057.7	1389.34	1268.6	3482.29	2832.63	-	-	3532	1	0	-	-	-	-	-
985	M399T280	399.308	4.66395	11632.1	10525	16280.5	9990	6013.81	10070.9	7678.22	5426.93	5455.87	7524.07	7904.95	6243.02	9545.5	6618.2	8125.37	7929.33	4696.23	5925.8	8401.32	8683.44	9910.83	6223.25	8717.91	7187.78	11720.8	8591.77	7336.72	7629.38	5626.05	7610.27	4198.01	9051.7	8924.64	6573.46	7825.18	5860.07	-	-	2626	0	0	-	-	-	-	-
986	M399T68	399.33	1.13927	632.176	1456.29	799.932	1159.45	1146.07	663.288	572.76	1103.28	1517.66	1360.81	920.656	655.256	951.262	1066.38	986.265	1141.6	824.589	577.469	2858.78	1950.53	1940.56	1709.62	1267.25	1378.53	2330.3	3249.68	1600.7	2386.01	2142.8	1971.48	3051.1	3187.55	3114.78	1122.78	1192.72	1401.95	[151][M+1]+	-	445	1	0	-	-	-	-	-
987	M399T198	399.334	3.29228	3918	3841.19	4625.9	3825.7	3560.31	3941.82	4984.75	2793.79	948.745	4189.58	2902.94	3162.74	5948.52	5195.19	3372.75	5911.41	5264.09	5293.71	2533.75	2368.02	2960	1830.5	1318.98	1667.76	3172.7	2824.24	2090.83	2990.99	1784.2	1629.71	3607.05	3362.62	2729.18	1967.58	1697.77	1252.28	-	-	4495	1	0	-	-	-	-	-
988	M399T378	399.348	6.29248	83160.4	33531.3	41562.7	15437.8	26183	14275.3	19214.7	21516.4	13167.7	17792.3	18232.6	13672.9	19734.1	15169.3	16100.5	15714	12155.4	12279.8	15017.9	27367	26139.5	13525.2	25151.5	15792.1	15112.3	16844.6	22272.8	31723.9	15424.7	23440.6	15555.1	16466.3	20550.5	30377.1	20627.2	31977.1	-	-	1907	1	0	-	-	-	-	-
989	M399T441	399.362	7.34603	22673	19216.2	19457.6	6810.56	9560.53	10058.4	3233.72	2735.34	1985.25	2222.86	2950.22	1425.47	1356.22	1143.43	2219.05	1359.87	1450.16	2957.97	2718.18	3208.32	4184.18	7625.5	6427.72	5307.33	3726.04	3432.97	3483.35	3553.54	1705.13	2610.15	3314.32	2315.99	2299.05	4198.02	1579.04	3521.09	-	-	2234	1	0	-	-	-	-	-
990	M399T343	399.366	5.71623	1956.42	1569.45	1137.49	19030	8819.1	13108.1	9856.49	15686.4	12952.2	10488.2	15338.8	6684.61	5733.99	5137.77	7056.12	11946.1	9916.28	3527.18	19074	18774.1	21317.8	18286.4	12577	11255.9	34744.3	25326.4	10154.6	35503.8	37495.2	22759	46490.6	42742.2	43064.4	30777.1	21318.8	22872.8	[152][M+1]+	-	3658	0	0	-	-	-	-	-
991	M399T617	399.39	10.2781	134554	256331	105509	18544.1	25010.4	46372.5	11656.1	25951.5	11013	12368.6	8010.65	14839.9	3681.13	9641.22	32243	3605.87	2637.03	4314.22	10467.2	11175.1	8796.46	8438.06	8325.16	9124.34	10707.6	13444.7	5765.21	8142.05	6928.43	6481.52	4888.73	5240.67	6552.03	11119.8	6014.7	9207.78	-	-	2521	0	0	-	-	-	-	-
992	M399T377	399.39	6.28237	78250.7	79156.9	80757.2	44713.6	50574.9	67946.5	14295.8	19022.5	16047.1	12375.5	12368.8	10128.7	13651.8	11462.1	14770.7	6613	4878.58	4992.77	21806.2	20559.5	16711.9	19629.1	23876.3	25142.3	18524	23025.6	20026.7	14690.2	14305.2	14973.5	17341	13311.2	13430.5	12607.5	10486.1	13937.1	[148][M+2]+	-	1895	0	0	-	-	-	-	-
993	M399T470	399.39	7.83765	27295.3	15228.6	25092.5	17130.5	16352.5	17988.7	13548.5	16148.6	10183.2	11070.4	12061.4	11194.2	10304	10710.9	14916.8	10766.8	8700.83	14093.6	13965.6	14098.4	15840.5	14562.9	16557.1	15624.4	12658.2	15076.6	15556.9	15150.8	10073.9	16020	13596.5	11015.4	12677.2	13316.5	11061.5	12139.2	-	-	1377	0	0	-	-	-	-	-
994	M400T336	400.27	5.60333	1859.25	1978.18	1901.48	1640.27	2432.33	1801.11	2379.62	2231.47	2225.17	2527.54	2489.4	2004.72	2637.41	1722.25	2746.96	1948.85	1906.65	1695.62	1617.06	1570.66	2150.41	1887.11	3409.27	2915.66	2495.87	1766.07	2299.08	1853.64	1494.19	2742	3333.05	2869.17	1404.66	2527.71	2096.52	2630.92	[146][M+3]+	-	2975	1	0	-	-	-	-	-
995	M400T293	400.343	4.8859	7410.03	4790.82	2814.44	4748.02	5646.78	5043.83	5969.43	4872	8059.57	10272	19440.3	4738.49	3266.52	4488.57	7460.59	11803	7492.34	7793.06	4386.24	2802.77	6126.05	5023.01	2954.34	4708.35	11632.7	6689.87	2494.88	5421.38	14388.2	7849.52	10781.5	13296.5	12845.5	7889.13	6448.31	6493.96	-	-	3839	1	1	Acylcarnitine 16:0	Fatty Acyls	AcylCarnitine	LMFA07070079;LMFA07070004;LMFA07070098	-
996	M400T377_1	400.35	6.2912	11345.6	3953.47	4089.96	8808	9819.55	12058.6	5723.95	3227.43	5087.97	7286.98	4834.32	8187.72	4304.8	4527.86	4767.54	3354.4	3449.32	2893.37	4326.85	2745.4	6266.9	4399.61	7491.93	4890.15	5915.66	4886.01	2473.67	4679.97	3900.08	7661.87	5645.48	4206.45	4808.21	3941.59	5770.46	7460.62	-	-	1899	0	0	-	-	-	-	-
997	M400T343	400.369	5.71603	867.029	795.07	868.646	3680.4	2554.51	2381.99	2605.36	2319.32	2589.37	2215.83	4342.91	1906.07	1430.2	1352.19	1718.18	2253.55	1561.8	1428.24	3622.28	3397.23	3672.15	4355.98	2296.38	2344.84	6921.89	5306.44	2374.51	5748.59	6401.24	4210.91	7661.55	7384.27	7078.83	6042.85	3546.73	4447.81	[152][M+2]+	-	3658	0	0	-	-	-	-	-
998	M400T360	400.379	5.99482	2271.05	1983.47	2115.64	29725.7	13898.5	19794.5	12172.3	21600.4	16377.8	10771.2	13984.6	7405.72	6459.6	6303.91	8106.78	13156.7	9146.82	3859.02	24295.3	24861.3	25075.7	21522.8	15802.9	13230.3	45310.9	36038.9	8987.84	46291	40218.8	22979.6	39876.7	42311.4	40100.7	34713.4	21520.3	25597.1	[153][M]+	[M+Na]+ 377.382	367	0	0	-	-	-	-	-
999	M400T377_2	400.393	6.2793	10159.7	11526.7	11120.4	6363.49	6786.61	5806.02	1642.5	3739.04	2513.82	2310.75	2301.16	2926.38	1235.78	1349.48	2540.89	1109.01	2140.25	2430.64	2791.23	3101.38	2355.41	4104.29	2411.21	3191.58	3502.1	2878.55	2665.15	2532.85	2382.67	2744.85	3387.5	1728.23	2899.54	1715.58	2202.34	3738.33	[148][M+3]+	-	1896	0	0	-	-	-	-	-
1000	M400T617	400.393	10.2914	21078.3	21243.6	23827	3065.02	4883.06	7379.26	918.666	2580.92	1511.33	1540.48	1503.85	1760	1892.51	430.11	3816.81	1166.95	758.905	832.563	3624.97	2102.11	1662.43	1626.52	1308.54	1948.87	2306.78	3000.34	613.962	2047.19	1561.49	969.657	1468.97	532.937	497.035	2332.12	1048.88	676.922	-	-	1822	0	0	-	-	-	-	-
1001	M400T367	400.414	6.1112	7642.13	9235.4	7369.99	4134.7	6242.06	6782.23	3124.77	3402.17	3207.26	3023.45	2656.92	1982.43	3426.78	2024.57	1690.82	4627.55	2262.7	1616.78	3827.52	2291.81	5786.03	2204.61	3637.15	2906.62	2728.99	2503.89	2134.46	3433.59	3533.41	2193.26	12894.8	2267.21	2486.18	2511.13	3238.59	2435.46	-	-	3467	0	0	-	-	-	-	-
1002	M401T1003	400.904	16.7175	2610.04	1199.41	1601.31	2070.25	2038.86	1407.55	1903.25	1761.33	1618.25	1628.79	1561.09	1980.61	1975.9	2020.17	2116.37	1487.12	2051.45	2167.52	2559.61	2362.59	1726.99	2048.22	1780.53	1501.51	1230.91	1487.45	1865.05	1826.57	1568.21	2360.9	1971.36	1220.68	1719.63	1409.36	2223.66	1670.8	-	-	4903	0	0	-	-	-	-	-
1003	M401T47	401.159	0.788417	4920.95	2402.58	1646.7	3075.59	3200.94	2262.7	1129.05	1451.12	744.702	933.9	997.928	996.268	908.37	688.796	1083.37	1108.73	634.074	579.036	1776.83	1719.2	1993	2265.95	2927.27	3170	1945.01	1824.16	1576.76	723.276	1728.26	1593.6	1292.8	1647.58	1937.61	939.995	1490.64	847.463	-	-	4019	1	0	-	-	-	-	-
1004	M401T207	401.161	3.45747	958.357	1402.88	1215.09	906.234	735.638	834.203	921.584	781.717	1047.95	598.267	528.169	704.859	847.838	787.104	797.024	724.969	686.376	571.008	1688.63	949.871	1364.03	1646.05	1195.51	754.053	2248.43	1930.66	848.041	1769.31	1269.4	1726.05	1786.07	985.888	2635.97	1300.86	1277.83	1385.8	-	-	3955	1	0	-	-	-	-	-
1005	M401T312	401.263	5.19334	4378.58	5384.03	5201.17	4566.07	5872.85	5640	4531.99	5017.42	5389.12	5848.83	3859.1	4311.19	4806.37	5456.55	3037.12	3857.56	3179.35	5085.51	4433.24	5588.91	4942.83	7819.28	7144.63	6035.09	4452.6	5468.73	5485.29	6157.36	5749.2	4882.28	3325.36	4607.67	3296.88	3018.4	4678.84	5047.12	-	-	1449	1	0	-	-	-	-	-
1006	M401T615	401.29	10.2505	245696	147677	151762	38339.1	56864.2	73707.8	7352.4	15480.5	8559.18	9168.11	12995.8	8044.06	6837.74	4237.81	14068.3	7166.53	3847.64	2604.82	19738	25285.1	25976.3	13968.6	19380.8	15426.1	15783.8	25404.8	10632.8	18871.2	13990	12903.3	12476	11983.2	10505.1	19079.8	10594.7	17722.2	-	-	260	0	0	-	-	-	-	-
1007	M401T288	401.29	4.79937	19442.8	16833	24468.4	17689	12352.8	25094	4882.83	3868.25	3612.63	3551.7	7351.02	3728.89	2110.34	3712.89	6865.4	2587.24	2857.49	2976.9	5000.18	4910.77	4836.06	7159.5	6486.65	8258.4	4511.8	6190.68	4224.28	5641.68	5188.5	5304.26	3286.5	4289	6931.56	4700.47	3562.04	4327.25	-	-	419	0	0	-	-	-	-	-
1008	M401T330	401.301	5.49813	2550.56	2968.68	2922.14	10519.8	7104.89	9550.81	3442.3	4522.22	5859.65	6089.74	4171.27	4757.18	3302.81	4205.27	6489.96	3994.09	1654.68	3116.67	5214.72	5468.33	5135.19	7732.62	6988.34	7129.24	4663.41	6740.35	4634.24	3942.37	4284.27	4775.05	3753.69	4273.67	3908.73	3507.8	2820.54	3405.62	-	-	4199	0	0	-	-	-	-	-
1009	M401T338	401.342	5.63242	14885.9	22017.1	14625	15328.8	20830.8	14637.8	20278	14382.6	14439.8	22210.2	14867.1	12891.8	17528.3	12537.6	13883.4	24235.9	11041.5	18078.7	15839	16056	22265.5	9805.43	15154.6	8684.56	14658.5	10980.3	11560	15389.4	15491.7	21757.7	19410.1	14780.6	16437	15276.2	21895.1	15983.6	[154][M]+	-	4121	1	0	-	-	-	-	-
1010	M401T360	401.382	5.99484	1504.88	1934.98	1811.92	8675.31	4185.15	6069.83	3724.18	5857.37	4964.05	2821.13	4106.99	2071.15	2459.57	2208.09	2296.66	3725.99	2248.15	1113.65	6637.21	6426.86	7059.4	6187.58	3979.34	3841.6	12380.3	9117.14	2905.47	13440.7	10864.6	6567.71	12732.6	12637	10916.2	9259.5	6082.1	7396.02	[153][M+1]+	-	367	0	0	-	-	-	-	-
1011	M402T616	402.293	10.2616	43005	45300.9	38185.4	9482.87	17540.7	21669.1	1888.6	4136.93	2509.09	2394.64	4504.08	3596.2	2291.33	2506.98	4012.28	2021.53	1360.15	841.608	5910.41	6375.37	4703.33	3338.39	5277.4	8060.47	6968.95	6607.5	2938.13	4889.16	3261.78	3092.34	3394.73	2272.89	2963.64	4838.15	2812.33	5411.09	-	-	2503	0	0	-	-	-	-	-
1012	M402T303	402.303	5.04617	4501.51	6774.92	3960.48	8070.51	3628.99	6321.36	2167.49	1906.84	1941.93	2221.79	2401.82	1525.23	1869.71	1671.88	3923.91	3174.47	1461.13	2045.46	1488.42	1717.82	1635.12	2086.71	2944.64	2330.65	2772.2	4110.99	2118.87	1956.31	2119.65	2777.23	2568.78	3070.74	2996.99	937.566	1441.28	1584.31	-	-	4672	1	0	-	-	-	-	-
1013	M402T210	402.323	3.49856	996.884	938.274	851.691	1100.98	1129.18	695.665	911.35	1180.43	1166.81	747.85	770.688	805.302	1178.01	497.524	991.49	843.463	926.908	873.456	2903.55	2913.11	3770.59	1862.81	1319.24	1429.64	3463.91	2656.78	2583.65	3734.6	2753.66	2052.07	6730.59	6949.27	6216.76	3253.48	3629.87	2318.02	-	-	2411	0	0	-	-	-	-	-
1014	M402T338	402.346	5.63997	4830.6	7882.25	6463.31	4315.76	8483.82	4295.74	5972.57	4707.59	3964.45	8524.22	6068.68	3924.3	7120.97	5291.85	5415.49	3371.86	4021.08	4246.08	5710.6	5137.3	6795.72	4108.17	4867.68	3653	5465.34	3712.05	10310.6	5437.77	5319.47	7076	6307.64	4297.63	5292.63	5954.5	6597.08	5155.06	[154][M+1]+	-	4122	0	0	-	-	-	-	-
1015	M402T259	402.357	4.31462	2237.76	3546.33	5060.7	4055.02	4007.92	3904.81	4504.26	4253.8	2968.69	3667.66	2892.71	3245.43	3402.62	3357.09	6066.87	3126.02	4329.99	3475.77	4517.44	2814.98	4872.54	3607.58	7839.33	3919.62	1165.93	5251.01	2298.55	4601.98	4183.23	5555.58	4353.13	3994.8	4461.05	2926.34	2700.34	3220.83	-	-	4154	1	0	-	-	-	-	-
1016	M402T360	402.39	5.9967	1370.31	1637.2	1803.34	2826.27	2006.42	2392.93	1331.02	2116.28	1904.57	1469.07	1370.16	1291.58	832.402	1305.87	1196.77	1403.39	1010.69	712.16	2206.49	2590.22	1525.87	2504.07	1627.05	1895.38	2807.73	2801.33	1931.71	2903.43	2687.57	2363.56	2924.81	2666.34	3229.96	2146.42	1813.86	1800.38	[153][M+2]+	-	367	0	0	-	-	-	-	-
1017	M402T295	402.394	4.90904	7901.42	8314.85	9037.05	10886.3	11399	8382.81	13310.4	8842.49	9405.54	11640.9	8232.87	8286.95	13012.2	9508.34	9319.03	10359	8786.45	10122.7	8546.79	10390.8	13938.4	10703.8	11970.1	11436.8	9697.88	11100.7	11957.4	9001.46	9785.77	11924	10977.2	9193.5	10640.1	10060.2	14207.8	7614.18	-	-	1610	1	0	-	-	-	-	-
1018	M403T207	403.176	3.45067	2145.7	1645.22	2170.82	2407.53	1367.9	1840.02	1482.98	1899.55	2224.4	1618.42	1531.81	1200.64	1993.61	1179.71	1858.14	2039.5	2850.46	1164.36	3188.18	3842.27	3741.36	3117.71	2284.62	2913.12	3007.21	4682.05	2504.04	4158.27	3491.03	2482.98	3099.87	4707.93	3714.76	2058.88	2478.78	2947.36	-	-	2920	1	0	-	-	-	-	-
1019	M403T250	403.233	4.15963	31377.1	49818.4	32151.5	25445.5	22353.1	23768.1	24591.2	48966	27850.7	24918.7	23345.6	26180.6	20227.6	43757.3	28272.5	45570.8	15625.8	44342.4	52277.5	30470.6	50796.2	37058.7	53353.5	18314.6	55778.9	35427.2	62056.1	31768.1	21407.1	31848.8	35668.6	20389.5	33741.4	33922.2	74085	16473.3	-	-	4067	0	0	-	-	-	-	-
1020	M403T371	403.378	6.17617	1896.76	3344.98	2814.48	1930.77	1601.86	2043.97	2890.12	1637.78	2092.75	2581.33	2073.53	2054.21	2811.28	1598.45	2302.16	2953.56	1733.01	1732.15	2353.73	1912.96	2331.26	2858.7	3269.51	2232.73	2272.34	2155.78	2610.29	2391.32	2592.83	2451.56	2260.57	1773.37	1826.64	2222.37	3567.86	2972.79	-	-	2053	0	0	-	-	-	-	-
1021	M403T294	403.397	4.90612	1717.17	3469.29	1605.25	2217.35	938.73	1932.67	2895.64	2517.23	2172.19	3898.12	1720.59	3241.78	3013.66	2922.02	2363	3948.64	1860.04	2198.45	2164.06	2337.09	2491.93	4493.05	4367.36	3651.87	2232.97	2567.45	2931.57	2821.93	2091.65	4847.53	2423.96	2647.84	3969.99	1388.96	1541.79	2259.05	-	-	1611	1	0	-	-	-	-	-
1022	M404T252	404.236	4.19428	5858.03	7174.4	5171.71	7332.42	4467.48	8036.95	4556.33	4851.45	5648.79	7328.66	7928.89	6439.35	6978.29	6326.64	6738.78	12643.8	6194.15	14046.1	3351.24	5785.67	6249.49	6242.79	5075.15	7779.89	14773.2	9192.76	14946.7	9300.22	8657.55	5247.05	9730.99	13478.4	6186.22	5003.67	13903.1	8177.57	-	-	1337	1	0	-	-	-	-	-
1023	M404T156	404.301	2.60213	1769.78	1848.63	1382.41	2066.03	1563.26	699.712	787.967	2244.61	2011.44	2191.7	2618.51	2052.53	1340.4	1299.93	1095.76	2024.76	1252.51	674.87	2317.38	2453.68	2243.91	2892.41	5015.17	4857.51	6722.99	3079.11	5852.07	6906.19	6071.43	5001.14	7147.97	14026.8	14660.7	4471.25	9525.32	4337.3	-	-	372	1	0	-	-	-	-	-
1024	M404T278	404.315	4.62717	5709.92	4432.82	4588.5	8580.06	5551.38	6884.72	3208.15	2972.98	3692.43	3401.29	3886.73	3362.98	4006.42	3076.51	3109.57	3809.48	3229.5	1849.54	3843.42	3053.84	2303.2	2969.26	3633.6	4866.28	2405.37	4752.54	2896.85	2500.15	2301.29	2746.63	3210.26	2352.53	2434.59	2748.63	2802.57	2417.27	-	-	3395	1	0	-	-	-	-	-
1025	M405T999	404.914	16.6506	2636.91	1909.53	2757.77	2112.26	1447.87	2065.84	2260.38	2734.82	1728.09	1966.22	2071.15	2133.35	1402.27	1661.69	2276.28	2334.28	3005.21	3507.19	1889.08	2986.35	2240	2123.72	2817.54	3114.75	2989.52	1812.4	2600.3	2346.79	3231.23	2527.5	1443.98	1604.73	1825.16	2600.08	1582.27	2193.57	-	-	4783	0	0	-	-	-	-	-
1026	M405T293	405.266	4.88707	7859.13	18649.4	7966.22	8127.55	10666.5	7756.68	9484.71	7308.82	7299.59	9090.06	7813.57	10132.7	11676.2	8496.23	13079.4	9397.21	10024.4	7537.7	8113.62	5702.47	10277.3	12505.8	7809.94	13002.2	10454.5	10202.3	11339.6	7319.19	3455.9	7844.55	6982	8237.94	4705.92	5130.73	8428.86	6862.76	-	-	3840	1	0	-	-	-	-	-
1027	M405T361	405.3	6.01903	11241.3	14332.6	8710.69	16324	19644.8	7260.49	9053.15	12379.3	13309.4	18599.2	14976.8	17337.4	21812.9	10784.5	10693.2	9753.09	11187	10316.7	9062.64	16497.2	21204.5	15910.7	18616.3	16833.2	18219.3	13258.2	15061.4	12507.8	14731.8	20319.5	14259.7	11831	15348.2	11642.3	22210.4	13437.6	-	-	430	1	0	-	-	-	-	-
1028	M405T319	405.298	5.32377	21280.1	21098.1	23078.9	11374.7	12777.5	12429.6	6219.88	5556.92	5200.14	5610.7	5162.45	4475.73	5506.92	3404.79	4721.49	5527.77	3689.89	4073.89	5996.21	6120.38	7000.88	6290.97	7998.63	6323.29	5443.03	3719.03	6869.85	4115.88	4689.66	6853.46	5285.04	5818.26	4989.36	4865.79	6712.06	4990.71	-	-	4166	1	0	-	-	-	-	-
1029	M405T496	405.373	8.26238	5823.29	2624.5	3972.26	3502.26	5244.94	3894.32	3711.28	35256.1	4080.12	9132.76	31666.7	14013.9	2627.57	5938.91	10530.5	5165.31	9785.14	2367.69	7529.69	6225.21	7807.72	5556.27	8197.47	6234.56	18498.2	19192.7	5490.63	50643.2	17648.1	13088.9	13290.7	13921	12593	20955.2	21971.7	29189	-	-	1308	1	0	-	-	-	-	-
1030	M406T94	406.203	1.56155	2415.14	2367.28	2333.78	2083.41	2408.99	2151.29	2474.08	1722.61	1599.48	1238.53	4074.64	1135.62	1220.93	2176.56	1729.13	3038.01	1467.75	4133.16	3824.07	4415.05	3846.38	3509.88	3267.53	2975.55	3087.71	2917.87	3800.72	2945.23	2767.56	2701.78	2525.04	3013.26	3068.89	6868.8	3728.17	2439.68	-	-	4851	0	0	-	-	-	-	-
1031	M406T609	406.271	10.1567	3818.85	3204.26	2005.69	2568.69	2320.87	2413.15	3487.28	7479.04	6565.99	5293.93	4255.89	5457.83	1710.95	3051.81	6104.77	2953.29	1178.61	1714.06	3757.5	4263.28	3813.09	3191.34	1421.95	2352.03	3520.05	2913.78	3149.84	1281.08	934.517	1666.24	823.467	948.013	969.429	1505.57	1819.24	2835.43	-	-	2804	1	0	-	-	-	-	-
1032	M406T362	406.303	6.02603	2961.15	7332.33	2995.29	5143	3922.95	3736.75	4003.3	4103.65	3655.05	5697.56	3424.26	2098.98	4774.71	4507.51	3831.32	4675.31	5049.68	2282.18	4549.33	3357.73	5011.08	4103.12	6049.67	4444.78	3475.35	4333.34	3077.08	4206.4	4504.05	6561.38	3317.41	2365.5	5275.54	3494.33	4319.62	3556.84	-	-	4879	0	0	-	-	-	-	-
1033	M407T94	407.206	1.56435	1207.39	763.766	963.237	1003.68	980.503	989.887	1126.47	781.743	1735.83	1444.52	1476.12	1308.44	2072.13	1730.84	755.139	1103.21	1154.11	1261.92	2150.64	1868.06	1526	1398.71	1468.16	1217.61	1562.13	1059.34	2003.1	1054.98	1046.22	1192.42	1058.28	1097.63	1136.56	1991.95	1533.55	925.061	-	-	4852	1	0	-	-	-	-	-
1034	M407T208	407.22	3.46237	30511.7	19882	31068	19568.8	22189.5	22350.1	2226.63	4765.65	4626.27	5621.53	4132.67	4011.76	4343.46	4547.89	6530.95	6020.57	6246.98	2563.87	6825.53	4769.95	8369.31	10157.1	8076.92	12652.9	9727.42	7284.04	7399.55	11559.3	12701.1	10690.7	9885.5	12433.2	13292.6	9942.13	7988.82	6323.64	[155][M]+	[M+K]+ 368.247	3948	1	0	-	-	-	-	-
1035	M407T347	407.228	5.77579	2063.19	2176.77	2201.94	825.337	1602.15	1721.08	2774.37	1029.63	1950.61	1822.41	1219.82	1182.59	2046.6	1566.68	2851.19	2378.29	2972.82	1390.01	1198.18	1338.73	1568.47	1791.1	1664.44	2586.72	1543.07	1390.43	1505.12	1564.42	1957.25	1815.16	2441.79	1916.03	2761.24	1219.25	1437.88	1310.93	-	-	270	1	0	-	-	-	-	-
1036	M407T172	407.241	2.87357	3670.13	8194.13	3939.12	4707.95	3401.78	2839.33	1292.61	3683.37	3262.71	10271.8	4367.22	4461.03	1893.93	2642.24	12902	2463.69	2210.8	1717.25	3488.3	5435.94	4213.2	19917.9	4789.59	5173.81	3831.84	5768.22	25329.6	20261.1	15767	12952	11593.7	11507.2	13056.1	11085.4	12318.6	16178.5	-	-	435	0	0	-	-	-	-	-
1037	M407T68	407.241	1.13825	4830.89	3879.32	4899.69	2284.13	2698.61	2321.1	654.748	619.937	1281.21	985.777	860.446	824.206	1100.89	1124.58	1722.36	1150.62	718.822	939.016	822.744	739.592	898.024	976.318	1173.5	927.364	1217.13	1304.87	920.158	1268.41	1210.36	995.727	991.805	1126.61	953.961	1357.21	840.075	1164.77	-	-	445	0	0	-	-	-	-	-
1038	M407T198	407.241	3.29782	19114.9	2376.57	20314.4	12021.4	11094.7	2521.52	1443.25	5096.36	2642.95	4656.44	3986.84	5080.72	2421.52	2642.78	5562.15	3516.97	4197.21	4158.81	5025.49	6018.7	5693.6	7236.45	6225.02	7782.69	4104.75	5612.26	9896.8	17153.2	15177.8	15454.4	11948.8	11547.4	12660.7	10891.3	13629.8	10424	[156][M]+	-	4490	0	0	-	-	-	-	-
1039	M407T603	407.279	10.0456	126789	94275.5	113977	20313.2	35034.5	31241.8	2327.64	2153.96	1177.32	1671.08	1922.05	2339.36	624.983	1590.68	3296.61	755.599	1449.17	1377.46	7317.96	10002.3	11415.2	6044.46	6966.22	6868.37	10219.3	10050.5	4558.64	8213.73	3514.61	5707.99	6994.75	6481.2	4957.95	4876.23	2440.16	3426.31	-	-	1571	1	0	-	-	-	-	-
1040	M407T341	407.313	5.67511	24283.4	23014.2	21195	26111.7	21626.7	34235.1	12723.3	11640	11688.1	14861.1	12065.6	9979.61	11676.9	9398.82	10384.9	11562.2	7845.73	9863.82	8913.16	11348.7	12159.9	12641.4	15215.1	12919.2	10779.2	10503.2	13634.1	10419.6	10027.3	11336.8	9388.59	9047.97	10399.7	8065.11	9751.97	8590.25	-	-	403	0	0	-	-	-	-	-
1041	M407T265	407.337	4.41076	4371.4	16785.8	12289	6312.13	8974.02	6450.35	9346.19	8634.73	5278.24	8099.85	12534.9	6953.09	16626.7	12715.8	9482.14	11397.4	5380.76	13506.2	4485.65	11604.1	11197.2	6637.43	7588.35	7742	12979.2	8046.27	6128.96	7862.77	10142.7	11583.6	9439.93	5576.69	8303.82	10278.4	9142.51	8536.44	-	-	3719	1	0	-	-	-	-	-
1042	M407T381	407.352	6.3464	5422.87	6552.12	4850.92	6893.83	6757.77	5484.72	7300.66	8234.43	3531.32	8915.2	12869.6	6329.81	8378.33	9526.6	17272.1	4985.31	4924.09	10028.4	3094.97	1204.01	3269.52	1900.01	3495.18	4431.12	6271.91	3868.65	2680.52	4755	2851.71	2475.31	3699.19	2084.58	3029.75	4679.13	3170.95	3205.47	-	-	1344	1	0	-	-	-	-	-
1043	M408T208	408.223	3.46885	6905.77	4946.13	10849.7	5054.68	5734.59	6044.06	1975.63	1966.71	1148.87	2498.77	998.296	1579.42	2159.35	736.493	2406.9	2120.84	843.878	874.605	2955.57	2820.29	2850.62	2346.93	1759.8	3680.57	2005.92	3357.07	2462.33	5620.69	4733.33	4257.35	4003.66	4421.61	4426.09	3385.09	3360.7	1470.44	[155][M+1]+	-	3948	1	0	-	-	-	-	-
1044	M408T171	408.244	2.84223	744.159	1095.84	1143.36	1235.37	1121.51	1271.52	561.253	1195.86	1156.88	875.636	1429.25	1516.28	672.393	703.129	735.364	782.757	673.237	688.877	1222.41	1112.28	1262.69	1157.49	1374.02	1449.13	895.999	1502.53	1655.44	5223.78	4022.14	3198.92	3027.9	2985.96	3351.71	2911.26	3289.26	4065.77	-	-	459	1	0	-	-	-	-	-
1045	M408T198	408.244	3.29449	5153.71	4434.09	4854.89	3045.08	3156.85	3145.4	460.088	1810.37	1337.67	1539.7	864.102	1978.57	1143.75	1221.54	1575.59	1067.29	1140.03	1538.29	2028.17	1876.98	2676.91	2187.87	2035.15	2188.17	1815.29	1888.9	2416.94	4555.25	4268.73	4362.91	4283.09	3145.68	3591.03	3507.11	3493.89	2896.94	[156][M+1]+	-	4490	1	0	-	-	-	-	-
1046	M408T280	408.259	4.66657	9569.01	7814.7	12318.5	10052.9	14047.1	6811.88	8252.77	5237.46	6884.11	7395.18	8005.46	5629.57	10159.4	11397.7	6696.69	6995.42	5425.17	9227.74	8387.79	8595.22	9819.3	7512.66	6464.25	5552.47	8367.91	10164	11505.7	3749.23	7210.3	9806.33	8376.25	4154.47	8161.69	8876.86	6875.44	8053.57	-	-	2627	1	0	-	-	-	-	-
1047	M408T603	408.283	10.0479	26057.9	31610.8	36631.2	4846.62	10783.9	10368	1301.39	1097.33	755.064	1009.54	1237.22	979.838	821.785	1495.52	968.935	1151.29	1358.23	923.086	3017.98	2163.15	2228.69	2759.83	2433.64	2600.7	1606.83	4515.16	1881.51	3065.03	1459.07	2002.03	1549.96	1364.09	1980.32	2183.76	1963.25	1336.01	-	-	1567	0	0	-	-	-	-	-
1048	M408T323	408.309	5.39135	10280	12657.6	10156.2	9788.99	13752.5	11457.4	12531.8	10705.1	11292.1	15792	11385.3	10023.9	13530.6	10594.6	10605.4	11144.6	12411.1	11078.7	9320.69	9235.82	12950.3	11222.7	13325.7	10704.8	14248.1	10091.6	11982.1	10778.3	9467.36	12880.6	11612	9667.95	9890.25	9697.18	11377.3	10486.3	[157][M]+	-	3912	1	0	-	-	-	-	-
1049	M408T264	408.312	4.40297	3944.88	4602.48	4226.07	7653.73	5078.32	7954.88	4361.52	2873.13	1446.86	2650.6	2486.86	1257.21	5563.77	2845.32	2271.54	3670.19	2056.22	2051.62	4654.92	7381.84	4439.33	4677.92	8019.5	14141.8	8391.78	3692.81	5377.09	5091.38	6846	5630.38	5979.6	5615.13	5909.03	3609.06	2887.96	2220.11	-	-	3902	1	0	-	-	-	-	-
1050	M408T296	408.368	4.93827	25348.2	37389.7	25476.4	22636.5	35900.5	25410.9	28004.1	24238.4	26544.6	39611	26288	26290.4	48422.7	31076.2	28444.3	26981.8	26430.9	30350.8	28698.4	8636.94	33324.3	28733.8	36733.1	24795.8	27534	26471.5	31278.2	24336.7	28536.1	39413.8	28251.9	28072.4	34764.3	28021.6	38040.5	28675	[158][M]+	-	3283	0	0	-	-	-	-	-
1051	M408T350	408.381	5.83285	7113.97	9860.05	8884.48	9110.34	9231.57	7555.39	9518.74	10179.7	9617.64	14445	9146.8	9132.46	8838.22	8925.37	11085.9	6598.85	8902.23	7539.65	9734.91	8016.98	9532.8	5167.94	9125.37	6687.97	3419.23	4464.22	6787.8	7790.8	8229.52	10968.5	6219.77	6386.42	8517.54	8817.31	10812.9	8532.66	-	-	2102	0	0	-	-	-	-	-
1052	M409T333	409.184	5.55478	9829.09	13131.7	9664.05	11065	14499.7	10578.7	15057.8	11906.1	10499.2	17356.2	11254.8	12725.9	21697.1	11834.2	9938.01	11782	11884.2	13056.9	11159.8	9572.93	14382.4	11103.8	15709.2	13095.5	18362.8	13568.6	13729.2	10973.9	10946.8	15077.7	10324.2	14265.1	10360.6	9587.31	13588.4	9471.09	[159][M]+	-	304	1	0	-	-	-	-	-
1053	M409T208	409.195	3.4592	1412.84	1992.19	935.948	3558.73	2146.56	2694.14	15787.9	2024.75	3165.43	1752.11	1839.16	1359.53	1349.12	1799.13	1744.32	1565.87	1805.25	1281.37	3890.83	5273.09	6529.26	3076.74	4967.67	3631.85	4426.74	4573.42	4037.47	3984.96	4990.69	3985.99	5116.73	6591.82	5125.34	3274.46	3538.25	2072.98	-	[3M+2Na+2K-H]3+ 368.247	3948	0	0	-	-	-	-	-
1054	M409T211	409.235	3.51116	14117.5	18934.1	16428.8	36429.5	27951.3	18996.5	17304.6	31824.4	42639.4	22119.8	24148.8	20702.3	30647.5	25346.9	21777.3	26085.5	21580.7	15240.1	89054.7	109719	91638.5	75387.3	66292.6	77222.9	67681.2	102382	74714	82115.9	102011	69100.6	105899	113330	115525	80776.8	62382.5	65520.8	[160][M]+	-	2412	1	0	-	-	-	-	-
1055	M409T157	409.257	2.6134	13284	12810.3	15991.8	21221.6	31346.2	30125.2	4630.87	36581.9	43655.4	10297	18416.2	13988.6	11744.5	13342.3	12734.8	31351.5	9996.15	6089.8	59354.2	60975.7	27619.1	64637.5	24352.8	29054.3	49900.1	29145.3	30742	74634.4	68257.2	118351	96940.1	65091	175860	51574.2	64052	60235.6	[161][M]+	-	4437	1	0	-	-	-	-	-
1056	M409T120	409.257	1.99865	35961.6	11298.6	36522.2	14648.8	33942.7	12445	2578.08	5689.49	4315.14	3529.23	2931.19	3790.1	3709.1	4670.85	3998.68	3389.94	3081.21	2517.7	23822.4	24556.9	18745.7	18587	18210.6	10549.3	20260.9	25744.2	29398.5	40245	37033.4	21693.1	45381.5	84747	56521.8	32382.9	18037.5	18061.1	[162][M]+	-	404	1	0	-	-	-	-	-
1057	M409T353	409.272	5.88172	7251.36	10484.3	7060.05	6769.73	9035.15	6912.99	10351	7090.05	7387.36	11229.1	8329.29	8528.48	8582.7	9058.72	10257.4	7835.14	9445.96	8430.95	7483.87	8540.98	9127.39	6852.17	8563.34	8720.15	9300.62	7535	8462.64	8233.03	7741.81	9390.65	7644.73	6849.66	8730.35	6360.42	8127.41	6910.91	[163][M]+	[M+K]+ 370.309	234	1	0	-	-	-	-	-
1058	M409T44	409.272	0.728433	3051.31	3456.8	3647.9	5638.04	4072.87	3841.86	8546.9	6179.51	6182.21	4299.69	2911.77	3818.43	3863.32	6271.21	5033.32	4371.83	2673.56	2762.75	3828.33	5919.09	4815.27	5700.13	5682.9	3608.58	2401.65	4371.56	4438.15	3384.8	4688.27	3935.57	3066.82	2562.69	4218.71	3728.47	5430.95	3571.3	-	-	4576	1	0	-	-	-	-	-
1059	M409T622	409.295	10.3721	39883.1	57155	40511.4	13737.3	25207.1	15957.6	8115.9	14268.7	7358.15	9972.89	20639.5	7852.68	15351.3	6409.3	19977.2	6415.59	6125.95	4580.2	6940.74	12405.5	11377.8	3937.56	4116.53	3931.3	7449.61	10274.3	4842.02	5665.82	5454.48	4388.33	2451.46	4141.39	2645.61	6286.76	5226.34	5688.75	-	-	3376	1	0	-	-	-	-	-
1060	M409T324	409.312	5.39548	3079.83	6050.24	2924.02	2591.23	3102.91	2406.72	4758.76	3586.63	3363.7	7798.64	5102.54	3239.06	6478.77	2996.23	4293.57	2930.83	2781.03	3250.87	2805.13	2870.38	3955.01	5406.29	4255.66	3207.48	3675.21	3268.25	3886.01	7130.19	2917.71	4512.37	2685.88	3478.12	3359.07	2280.13	3753.5	3068.95	[157][M+1]+	-	3912	0	0	-	-	-	-	-
1061	M409T371	409.329	6.17617	23246.8	19039.7	18932.5	9882.25	16812.8	12128.1	7767.38	5524.74	5263.63	7778.2	5771.53	5071.89	6311.78	6423.27	7079.17	9152.28	5008.59	8122.88	6628.95	4247.93	5597.35	5346.01	5711.29	6145.68	4910.67	4679.61	6119.9	5569.54	5831.68	5577.08	6897.11	4241.95	7007.84	8049.41	6489.51	5898.89	-	-	2063	0	0	-	-	-	-	-
1062	M409T402	409.363	6.69795	6707.55	6680.16	5851.14	3345.21	7209.44	4461.53	2898.43	3398.99	1925.2	3068.46	1166.89	2498.89	2706.33	1254.71	1806.28	2574.96	1881.55	1347.81	3335.83	2995.26	5826.46	3073.29	4534.37	2094.36	2214.87	3852.79	4178.25	3821.42	3688.46	5517.01	5275.29	1804.82	3199.96	5381.63	4331.07	3129	-	-	2764	0	0	-	-	-	-	-
1063	M409T296	409.372	4.93347	7386.36	10352.8	7051.48	4919.92	8613.95	4212.82	11684.5	7628.78	8663.31	11015.7	8213.1	7757.15	8104.12	8408.11	7842.59	11891.4	8015.31	6664.93	5513.87	8544.38	12871.4	3139.41	12166	7367.73	16597.1	8327.63	8779.37	7790.28	8757.84	8677.7	7556.95	10702.2	9151.65	9633.14	12595.3	10890.8	[158][M+1]+	-	3244	0	0	-	-	-	-	-
1064	M409T477	409.383	7.95209	12773.7	15717.9	110262	8297.19	12169.2	13309.9	31168	8823.24	19311.4	17060.1	34655.9	15024.6	22286.7	20060.8	15336.4	16494.7	21500.7	8055.35	39103.1	28694.8	32605.8	28620.2	27199.4	25634.5	24338.9	31618	12174.3	43033.4	28054.5	35045.7	35423.8	36578.5	34563.5	32759.4	27728.9	26236	-	-	3183	1	0	-	-	-	-	-
1065	M409T761	409.384	12.6793	322344	358831	324530	15018.3	15354	30170	10637.5	9340.8	7905.51	4441.88	14711.3	9439.58	6716.2	5217.27	9243.03	8827.79	9817.56	7117.26	14215.9	8975.41	9758	12859.3	17100.1	22613.9	14457.9	12437.9	6986.21	19618.3	14114.8	10612	11456.1	12476.3	9536.86	15127.6	6048.84	13796.4	-	-	1093	1	0	-	-	-	-	-
1066	M409T349	409.383	5.82342	2947.73	4222.02	2608.68	2728.49	3438.3	3299.82	2832.46	3950.24	2758.38	3364.1	3357.78	2909.01	2417.52	3555.46	3178.14	3095.42	3330.85	4031.36	3058.22	2920.09	4669.75	2784.71	2937.75	2727.81	6427.35	1947.03	1492.07	3277.13	3850.17	2000.81	2577.45	2962.12	2465.96	2619.98	2727.79	1833.68	-	-	2103	1	0	-	-	-	-	-
1067	M410T333	410.187	5.55454	2891.69	2865.43	2060.32	3869.61	3933.14	2467.03	4474.37	2858.89	3032.12	3784.75	2807.78	3125.87	3806.73	3369.7	2528.12	3032.64	3421.71	3500.13	3358.04	2479.43	3431.94	3428.77	4514.34	2589.71	4490.4	3822.99	3152.1	3044.48	2633.99	3705.86	2327.52	2409.66	2681.14	2692.82	4277.69	3392.4	[159][M+1]+	-	304	1	0	-	-	-	-	-
1068	M410T210	410.239	3.50076	3806.96	3506.2	5027.26	7563.8	5814.68	3893.95	5859	8575.95	12181.8	6164.35	6130.93	6425.27	7657.76	6670.57	6107.05	6863.24	6090.7	4003.69	23777.6	25115.8	23290.2	18540.3	17662.7	14663.8	18632.6	28826.5	19533.9	19167.8	22536.8	16704.5	25176.9	30668.9	29455.9	20667.5	17469.5	14830.2	[160][M+1]+	-	2412	0	0	-	-	-	-	-
1069	M410T157	410.26	2.61274	2980.34	2265.41	2122.97	5788.19	3313.37	3100.15	1611.53	4576.13	7179.27	2741.92	3139.92	3311.77	2921.29	2248.63	3993.8	8417.18	2828.96	1612.2	7431.22	7753.02	6524.65	7581.45	5984.48	7021.13	5777.81	7355.51	7469.99	19349.1	22493.7	13078.6	19382.4	17317	45468.4	12312.1	11320.4	13573.8	[161][M+1]+	-	4437	1	0	-	-	-	-	-
1070	M410T120	410.26	1.9934	3394.54	3190.12	3821.57	9012.82	3766.56	3100.23	1471.88	2411.49	4128.05	1777.86	1704.24	1831.47	1861.71	1871.08	2072.88	1465.77	1504.84	1076.9	11167.6	10764.8	7895.15	7189.7	3445.79	6401.56	4832.2	12575.9	10055.1	17852.8	8503.12	10632.6	11973.3	10298.9	14059.5	4674.21	4223.93	10890	[162][M+1]+	-	404	1	0	-	-	-	-	-
1071	M410T262	410.266	4.3584	7344.03	6509.42	6867.65	4176.57	4028.43	6044.53	2876.24	4203.54	1760.75	2788.65	3518.07	1821.92	2267.67	1565.23	2283.35	2917.4	2004.47	1711.47	5131.86	4592.58	6487.63	4716.46	4678.08	8354.55	7845.42	4014.09	4010.47	5795.28	3086.08	1949.6	5050.23	2739.37	2604	5200.98	2473.93	3662.87	-	-	4497	1	0	-	-	-	-	-
1072	M410T353	410.275	5.88076	2962.48	4158.04	1582.41	2068.38	3377.21	2642.26	3328.69	4412.74	1940.52	3673.78	2267.39	2619.82	3632.23	2296.16	2221.35	2910.22	3109.17	2960.04	2123.49	2708.63	2689.65	2102.09	3586.71	3114.48	2252.51	1379.5	2226.99	2049.98	2509.2	2047.48	1732.75	1826.5	2324.04	2690.32	2581.16	2676.89	[163][M+1]+	-	3585	0	0	-	-	-	-	-
1073	M410T43	410.275	0.724117	1567.98	1754.97	1439.52	1176.48	1225.2	1148.83	2395.46	1458.65	2398.67	1607.8	978.824	701.71	1663.84	1579.75	929.314	1766.63	758.5	903.739	1366.45	1287.11	1865.87	909.239	2408.78	1402.55	833.869	1560.48	1100.96	999.784	1174.5	1245.94	1132.07	749.525	1045.48	1124.96	1713.1	1281.53	-	-	3226	0	0	-	-	-	-	-
1074	M410T623	410.298	10.3883	11245.6	12186.7	13192.2	3890.95	5221.1	10815.6	2791.74	4427.47	2620.18	3605.95	4177.71	2454.78	5058.95	2725.8	7809.36	2097.13	1407.15	1129.6	2770.49	3611.37	2763.94	1491.95	1393.81	1780.33	1953.19	2848.14	1218.92	1518.69	1931.37	945.337	990.262	971.146	875.689	1315.24	1480.8	1788.18	-	-	2874	0	0	-	-	-	-	-
1075	M410T284	410.327	4.73935	1929.9	3152.38	3808.37	7534.99	3844.29	6460.19	8519.64	7091.25	10341.1	10907.5	8400.03	6506.39	13078.4	9116.69	17143.4	9808.06	3989.83	2778.08	9256.49	8219.81	8875.56	5720.51	7661.13	13331.6	9444.51	5456.94	6951.28	4555.76	7394.93	4836.89	5489.86	4802.37	4761.75	5156.54	3444.2	4493.55	[164][M]+	-	3094	1	1	Acylcarnitine 17:2	Fatty Acyls	AcylCarnitine	-	-
1076	M410T371	410.332	6.17544	7218.21	8632.08	4854.76	3877.12	5162.5	3866.6	2790.78	1405.75	2247.54	2887.82	2188.14	1938.36	964.691	1910.33	3535.55	2730.95	2133.74	2071.15	1649.31	1363.09	1242.38	1900	2157.36	2701.75	2406.11	1785.22	1775.08	2373.83	1666.14	2014.57	1925.81	2000.08	2061.83	1632.7	1354.97	1453.31	-	-	2053	0	0	-	-	-	-	-
1077	M410T477	410.386	7.94173	35812.8	38062.7	38521.5	6791.43	13980.2	20952.4	6435.64	3104.14	7315.3	8222.02	15085.7	8257.62	9055.03	5121.57	11396.1	6485.12	6948.66	1836.73	11666.6	8038.15	12888.1	9968.7	8879.63	10632.6	10619.1	10034.4	4727.03	16856.1	14247.5	15854.3	14721.3	12506.3	13918.6	14936.8	10694.1	8992.98	-	-	3070	0	0	-	-	-	-	-
1078	M411T241	411.094	4.01027	1032.16	880.292	1065.43	1026.47	1305.77	1376.96	1112	1681.72	1293.91	945.775	1144.8	1353.52	1253	1676.43	1478.9	1287.44	2709.38	1580.25	1677.13	1464.4	1276.37	1624.04	1018.94	1318.99	1499.96	1509.2	1357.49	1300.46	1070.58	1076.91	1287.36	1373.27	1276.48	1867.55	1258.09	1678.4	-	-	2949	1	0	-	-	-	-	-
1079	M411T333	411.18	5.55478	2580.78	2811.54	2196.28	1624.58	3093.87	1776.21	3857.9	2345.28	2859.32	3636.77	3221.6	2645.59	3327.16	2830.44	2689.85	3344.25	2611.49	2915.5	2311.96	2160.09	1794.93	2366.22	3719.56	3157.98	4220.74	3262.74	2635.22	2426.73	2575.94	3256.3	1769.57	2332.28	2113.36	1576.45	2887.9	1717.93	[159][M+2]+	-	304	1	0	-	-	-	-	-
1080	M411T319	411.189	5.31062	837.901	1033.43	1202.8	2548.93	1188.31	1986.58	3229.33	2700.48	3321.12	3312.57	2832.29	2698.25	2163.96	3052.56	2724.09	2312.68	2764.67	2562.89	2921.74	3866.24	2243.09	3626.6	3652.07	3271.18	1789.37	2811.34	2681.89	1379.92	2296.14	1676.5	2304.75	1675.52	1284.12	1683.85	1714.63	1888.49	-	[M+K+NaCOOH]+ 304.238	233	1	0	-	-	-	-	-
1081	M411T211	411.236	3.50852	2558.16	1976.48	2367.08	4188.48	2644.48	2531.61	2183.78	3906.68	4517.55	2790.71	2390.5	2491.22	4257.13	3137.46	2301.25	2918.93	3439.82	1993.49	10051.5	11288.8	11126	8605.69	7424.35	7510.43	7302.5	12929.9	8080.82	9300.44	11620.3	7720.33	11346.6	12336.3	13406	6754.52	8010.34	6502.61	[160][M+2]+	-	2412	1	0	-	-	-	-	-
1082	M411T250	411.251	4.16768	7836.58	7415.55	7515.49	6837.5	7132.48	3767.23	4799.49	9920.01	14897.8	7846.71	8474.85	7613.82	13786.6	9998.66	9455.41	16674.9	9369.05	3739.01	11729.7	12721.3	11241.3	10760.1	10730.3	10344.2	11389.4	9662.88	11648.2	14868.5	18363.7	9663.53	19473.8	16471.2	18647.3	17016.8	13311.9	14221.4	[165][M]+	-	4072	1	0	-	-	-	-	-
1083	M411T307	411.251	5.10952	2970.15	3003.61	2986.37	4163.78	3015.83	3110.2	2038.04	2753.59	2321.36	3718.1	1271.41	1717.17	4741.82	3246.67	2962.54	2721.32	2789.39	2947.48	512.488	2961.51	3519.64	3955.77	6514.61	1930.34	2371.88	4402.14	6087.49	706.44	2503.12	2655.38	2029.81	1657.8	1230.99	1719.51	856.138	1929.63	-	-	195	1	0	-	-	-	-	-
1084	M411T167	411.272	2.78943	3442.37	3996.12	12107.9	22966.7	27597.6	23651.2	5944.36	3752.33	1674.98	2697.1	2424.71	810.388	2079.47	1037.41	1556.88	1925.2	1284.43	1750.47	35800.5	40114.4	53985.1	27119.5	24877	11605.4	35102	23513.9	15330	36744.4	5734.42	3801.74	37721.3	15986.9	16948.7	20598.6	13507.8	30079.5	-	-	452	1	0	-	-	-	-	-
1085	M411T353	411.27	5.87845	2213.15	2473.96	2378.24	1212.25	1274.29	894.819	2931.26	2279.04	1926.35	1989.9	1553.32	3234.98	3264	1263.97	2165.26	1225.92	1728.2	1014.28	2002.73	1390.55	3009.76	1792.96	2599.29	2045.36	1701.58	1399.66	1319.68	2215.39	1446.29	2048.4	1573.7	1922.13	1835.17	818.125	2363.7	1690.85	[163][M+2]+	-	3586	1	0	-	-	-	-	-
1086	M411T284	411.329	4.73268	2241.39	1868.49	2171.56	3356.67	2810.42	2424.19	3408.04	2914.18	3629.06	3302.16	3379.03	2148.81	4432.81	2970.24	6713.64	3418.83	2084.05	2073.02	2519.59	3263.64	3255.03	2409.94	3473.63	3835.83	3189.94	2723.85	2441.12	2464.03	2667.85	2432.11	2725.82	2294.46	2640.44	2524.99	1957.66	2353.84	[164][M+1]+	-	3094	1	0	-	-	-	-	-
1087	M411T367	411.347	6.11515	16970.8	19970.4	14582.6	11706.8	16258.5	13289.5	20506.2	13738.3	14068.2	23741.1	17131.9	12825.6	39909.8	19773.6	20002.3	30512.6	27420.7	22377.6	9371.45	9369.53	10455.3	49439.7	67438.6	49471.9	20069.2	28484.2	55762.2	10023.6	11380.4	8740.03	10279.9	15020.4	12108.8	7867.14	14684.3	8566.79	-	-	3471	0	0	-	-	-	-	-
1088	M411T606	411.399	10.0977	15096.7	21008.1	17277.3	18092.5	25643.7	23619.7	13588	15807.3	16036.5	15582.1	19773.4	15723.2	14710.3	13864.4	12925.2	15796.5	13627.8	13415.3	14031.6	15377.4	21240.4	14515	17246.5	13996.6	15462.6	16973.3	12507	19958.2	14576.8	20188.2	15865.6	12674.4	13280.5	13946.8	16646.7	17525.1	-	-	2466	1	0	-	-	-	-	-
1089	M412T350	411.957	5.83294	3765.17	5999.89	4355.91	5097.05	3969.29	3385.28	5059.88	2974.65	3000.38	5378.88	3931.06	3809.69	4745.75	3203.54	4764.05	4067.91	3664.97	2779.38	3081.11	3333.69	3406.43	1892.56	4630.13	914.661	4820.49	4541.68	2285.63	3681.45	4000.38	3449.64	3624.73	2767.54	3565.41	1289.03	4921.3	3656.2	-	-	2091	0	0	-	-	-	-	-
1090	M412T319	412.204	5.30879	1228.27	1173.61	1415.54	2737.21	1468.89	2038.43	2421.16	2767.63	2554.14	1939.14	1604.24	1679.97	1784.34	1931.75	1640.3	1723.45	1731.75	1471.65	2605.15	2762.53	1648.95	1821.44	1748.74	1730.52	1313.8	1524.92	1352.99	1893.88	2013.18	1849.7	2323.67	2816.09	2007.18	2037.04	2679.71	2365.55	-	-	3533	1	0	-	-	-	-	-
1091	M412T250	412.253	4.1688	1844.25	2171.95	1961.92	1890.97	3324.03	1931.7	1520.48	2930.26	4580.54	2118.69	1565.96	2123.96	3562.12	2769.53	2405.01	4251.32	2605.87	3080.88	3020.39	2576.32	2771.24	2392.68	4831.53	2201.27	2588.84	4626.16	2041.34	4578.45	5205.95	4964.72	4337.66	4903.25	5245.08	3373.55	3959.38	4737.96	[165][M+1]+	-	4073	1	0	-	-	-	-	-
1092	M412T172	412.276	2.86539	905.787	1978.26	756.52	6282.82	4283.57	6930.58	1194.63	1135.91	1102.34	983.949	1098.24	907.148	1183.12	1017.14	1239.78	935.428	822.047	792.367	9474.91	8007.5	9039.32	9399.31	7068.91	3157.73	8199.92	7761	5673.29	4475.01	3687.3	895.347	4415.31	9787.1	10017.3	6990.17	1862.84	5188.01	-	-	4693	0	0	-	-	-	-	-
1093	M412T307	412.343	5.1211	1886.72	1634.89	988.276	2515.91	2101.97	1712.94	1901.15	1736.38	1744.95	1770.72	4207.77	2278.48	2340.45	2200.44	2641.24	1360.44	1555.63	1320.86	2536.22	3002.95	3457.43	2025.91	2653.73	4719.08	3802.04	2112.7	2743.23	2469.45	3380.3	2677.84	2193.67	2607.86	1553.16	3203.91	2194.37	1928.38	-	-	4645	1	0	-	-	-	-	-
1094	M412T367	412.351	6.11933	4849.35	9663.07	4102.58	4522.68	6025.84	2618.13	4595.56	4260.85	3326.04	6933.18	5900.16	3743.76	11419	6428.86	5334.49	8919.5	8184.25	9020.38	2466.99	3457.95	4900.45	14400.8	19941.3	13860	5891.53	9451.58	16397.4	3554.95	3646.79	2628.22	3095.81	5814.23	3721.56	4160.1	4870.64	2086.82	-	-	3112	0	0	-	-	-	-	-
1095	M412T606	412.402	10.0995	5411.68	7830	5895.71	7776.43	10165.6	9416.83	5272.56	4946.42	3904.05	5433.27	6123.13	4478.3	4336.99	4285.06	6376.2	4619.53	4273.26	3605.99	5284.79	6147.19	6835.67	5376.36	5450.61	5675.35	4317.45	8271.98	6250.76	8350.34	4499.97	6776.8	4884.94	4668.55	5147.76	4869.74	5335.92	4732.37	-	-	2467	0	0	-	-	-	-	-
1096	M412T472	412.415	7.86778	2553.38	2595.94	4228.99	10577.1	8638.64	8706.56	11052.4	11869.3	9165.95	9609.37	15855.8	9159.98	6025.67	6990.52	3987.91	6489.5	9163.89	5409.56	13519.5	14754.5	10147	26555.7	29630.7	22566.8	14170.3	11969.7	20873.4	19863.5	13931.6	10345.3	12686.5	11999.6	10403.8	5608.17	7088.31	11105.8	-	-	2429	0	0	-	-	-	-	-
1097	M413T47	413.157	0.786783	4146.59	4624.32	4895.05	3867.39	4613.66	4317.72	901.497	866.544	946.125	792.97	1068.6	1100.48	584.628	1054.39	661.592	920.816	560.932	638.304	1010.95	1279.2	1088.17	1461.68	1249.17	2186.87	1323.67	1433.68	1336.57	504.673	1001.57	1279.94	1459.63	1607.41	1553.2	535.755	984.708	674.37	-	-	4035	1	0	-	-	-	-	-
1098	M413T281	413.214	4.68265	2948.49	2764.99	2253.93	3842.38	3137.72	3010.21	3037.16	3471.18	2908.75	3393.86	2055.33	2457.27	3518.04	3079.48	3727.99	3262.17	3228.09	3767.75	2136.65	2201.52	1339.09	3029.28	2943.21	3206.03	2657.62	3417.87	4196.69	2338.47	2678.13	2057.57	2080.01	1354.41	2148.81	3407.51	3536.48	1991.02	-	-	2628	1	0	-	-	-	-	-
1099	M413T349	413.267	5.81988	448577	567607	440036	466943	554420	438674	577501	484511	476622	579289	458178	497717	559815	501603	477923	487823	480809	481907	437484	437263	491531	404086	457885	444956	449273	461043	451220	423844	431081	542840	455937	414408	436992	471273	531749	456892	[166][M]+	-	2079	1	0	-	-	-	-	-
1100	M413T203	413.288	3.37753	11690.4	12635.6	10007.8	17740.4	13772.6	14272.8	18925	27296.6	34919.1	21849.9	21697.5	20692.5	26891.8	24907.3	27573	42129.2	12626.9	16418.2	40781.2	43560.4	38829.6	26555.1	1459.74	22589.5	24263.7	24474.7	19299.9	27603.8	20324.3	5563.78	18702.7	22957.4	23290.5	22144.1	21875.7	21618.1	[167][M]+	-	3927	0	0	-	-	-	-	-
1101	M413T297	413.324	4.94793	11546.3	14939.9	9837.19	8493.49	13392	7151.07	6794.85	7251.05	5675.44	6810.29	11527.3	6675.59	8707.84	3657.87	7437.13	6071.58	4819.22	5759.65	6625.34	10275.2	11665.6	11354.6	9400.4	10324.2	10631.8	12057	14655.2	7226.94	8813.05	11822.9	9483.56	12017.8	8931.49	11412	10256.8	9034.68	-	-	3284	0	0	-	-	-	-	-
1102	M413T456	413.377	7.6064	78349	92119.6	90147.9	30955.7	32224.1	41436.5	14128.7	22373.9	9065.71	10200.1	15198.6	12250.5	8425.31	8799.16	18348.7	6224.73	10945.6	13939.7	19082.4	18788.8	17478	35884.3	29509.8	29802.8	17700.3	25572.4	21667.4	22465.5	15952.7	16431.4	15503.3	18157.7	17413.9	14932.1	12042.6	15991.4	-	-	4207	1	0	-	-	-	-	-
1103	M413T282	413.41	4.69941	1723.89	1855.9	1648.66	1538.74	1084.44	1100.06	755.804	1830.74	1461.18	652.679	1142.96	1009.36	1302.03	1728.52	1260.62	1021.69	1626.84	1044.81	973.066	1126.63	1009.08	1910.47	1335.4	1638.13	1468.84	1370.99	1547.54	965	1469.03	1273.31	975.05	1655.97	1929.09	1197.68	1173.61	1243.82	-	-	4298	1	0	-	-	-	-	-
1104	M414T349	414.27	5.81988	128352	169120	127227	126862	155674	119669	156490	137887	126318	153701	134624	135977	153354	134965	140724	133524	125314	131620	128269	112352	138251	116986	140361	123513	126715	131038	120053	119384	130466	144186	126861	113744	121871	131380	145586	123230	[166][M+1]+	-	2080	0	0	-	-	-	-	-
1105	M414T203	414.291	3.38852	3365.1	3977.72	3748.55	4342.31	2579.98	1983.77	6609.32	7202.38	8463.85	6091.1	4912.76	5112.36	6205.19	5721.83	6500.34	11453.5	4369.26	4356.59	11603	11989.2	9863.32	7254.94	6350.43	6450.14	5592.76	6875.64	4722.5	7341.09	5348.62	2784.04	5463.42	5991.3	5924.19	4825.93	6125.94	5247.06	[167][M+1]+	-	3927	0	0	-	-	-	-	-
1106	M414T57	414.321	0.942217	2612.98	1767.11	762.865	2169.26	624.024	1307.35	1387.62	1359.22	1790.95	1490.64	938.884	1353.45	1355.64	1946.12	2090.88	2862.39	913.125	2650.33	2001.89	1910.22	3105.99	2138.25	1044.48	1125.79	1353.08	2396.28	675.307	1556.81	2326.03	1569.11	1690.87	1628.78	1787.23	3293.92	1135.38	2956.84	-	-	542	0	0	-	-	-	-	-
1107	M414T254	414.321	4.23823	7714.15	7568.53	7930.05	7935.15	9058.6	7287.86	6783.53	9797.27	8545.49	14127.4	8523.06	14043	8548.13	9838.83	9154.28	10387.1	8761.34	7900.3	9983.67	13151.9	7648.55	11198.2	11014.5	7613.41	10850.8	6088.37	6606.99	11007.3	17601.8	9247.42	8373.78	17752.3	10842.1	9994.41	7800.98	9786.43	-	-	4102	0	0	-	-	-	-	-
1108	M414T298	414.358	4.97073	2219.5	2540.18	3007.92	6689.43	5469.67	5701.38	5862.37	4920.43	6872.91	5198.71	6209.49	4495.73	3617.24	4865.3	6549.4	4927.25	2185.46	3029.43	4712.08	6539.79	4804.72	2317.2	3202.16	2224.38	3690.14	5019.45	1731.38	4881.18	4789.46	4828.44	4091.36	4886.4	4386.79	3868.19	3702.61	4287.13	-	[M+H]+ 413.345	3857	0	0	-	-	-	-	-
1109	M414T456	414.381	7.60669	28488.9	29268.7	29145.9	11316.6	15423.1	17295.7	5731.41	6485.27	5138.71	5990.17	8240.25	5519.65	2502.16	4067.69	8581.02	4089.25	5004.9	5873.65	6498.23	6773.7	7258.28	15374.2	9431.15	10873.4	6818.47	8365.26	9350.25	10567.3	3327.75	4556.5	6835.03	7566.09	6678.43	5701.99	2217.47	7491.52	-	-	4208	0	0	-	-	-	-	-
1110	M414T470	414.41	7.83646	8294.85	5969.18	4663.01	4152.73	1952.24	3491.29	2944.49	4157.75	1616.47	2988.76	3098.16	2727.5	1873.47	1323.65	2605.69	3764.4	2702.18	4024.43	4776.6	2092.1	2886.86	4258.77	1202.31	5694.25	4538.62	3506.91	5215.65	2917.32	3591.19	4151.45	2814.06	2447.92	2274.42	2659.58	1473.25	4186.89	-	-	1358	0	0	-	-	-	-	-
1111	M414T384	414.43	6.40152	13939.9	18143.6	14598.4	9021.84	10959.8	12488.2	5442.38	6906.88	5099.78	5710.14	5759.24	4528.13	5810.6	4941.35	5496.7	4044.7	4044.64	4371.65	6447.29	6330.84	6746.56	6109.26	7998.34	6632.72	8114.12	6243.14	4482.78	5850.62	5861.68	6890.89	5766.65	5993.3	5953.91	5366.51	6402.76	5294.26	-	-	2208	0	0	-	-	-	-	-
1112	M415T350	415.273	5.82516	19751.3	28010	21040.7	20802.2	28787.2	21275.3	26160.3	21913.3	20185.7	33390.5	23665.7	21666.5	24709.6	22864	21509.4	21002.5	23742.1	20054	22095.1	19187.4	22807.7	18191.4	24591.1	21043.5	22011.4	22356	22415.8	24289.3	19812.5	23805.8	20533.2	19579.2	21213.5	23607.1	23898.4	20273.8	[166][M+2]+	-	2077	0	0	-	-	-	-	-
1113	M415T602	415.27	10.0387	32220.1	45571	38048	16688.8	29990.9	26142.8	3097.19	3830	2225.15	2696.55	1968.17	3227.39	2747.88	3047.18	2960.42	3182.67	1911.92	2818.27	10100.9	9643.79	13054.5	8133.9	7742.55	10969.7	9712.8	12520	4920.54	7877.17	4815.45	6258.72	5896.71	5969.28	5464.45	4472.53	4467.27	6803.98	-	-	1574	0	0	-	-	-	-	-
1114	M415T203	415.293	3.38011	1051.72	1229.18	1193.91	1185.72	938.212	934.56	1724.51	1989.78	1353.68	1470.89	1279.46	1438.55	1359.86	1291.16	965.571	2197.06	1384.43	1122.3	2403.7	2311.43	2675.25	1613.75	1441.21	1634.08	1343.96	1154.76	1361.57	873.952	1808.62	1062.57	1209.38	847.051	1327.16	1410.48	1346.85	1313.07	[167][M+2]+	-	3927	1	0	-	-	-	-	-
1115	M415T345	415.317	5.7541	2030.54	20402	1654.17	11967.1	2877.04	2657.21	14297.2	2684.17	2306.27	1990.14	2115.77	2343.92	1533.69	1462.7	3085.14	14291	15833.8	12683.8	2334.95	2789.28	2885.48	3940.01	3909.15	4558.4	2684.37	3356.97	3706.32	1840.6	2231.03	3212.34	2573.3	2303.26	2598.2	3226.17	3702.99	2059.23	-	-	4615	0	0	-	-	-	-	-
1116	M415T210	415.317	3.49504	1518.08	1815.21	1589.34	2403.53	1664.46	1630.7	1460.83	2483.34	1778.56	1829.58	1820.39	700.467	1219.58	562.319	1521.36	1322.08	1376.1	1206.22	5066.92	4955.43	6593.97	1386.88	4590.83	2038.1	5893.46	7128.94	4671.76	5609.27	5514.06	5202.22	7792.68	9696.7	8386.69	6052.69	5326.31	4393.17	-	-	2411	1	0	-	-	-	-	-
1117	M415T388	415.357	6.46373	10415.3	8585.97	9219.16	3991.06	8978.27	6391.67	7560.96	7444.32	6198.18	4840.29	8447.31	3522.75	6281.74	4345.62	8244.78	3732.17	2592.3	2806.32	7149.76	6110.07	6625.16	9448.93	7456.15	5146.21	8584.43	7928.43	4161.82	18129.5	8064.42	6866.79	9874.4	9368.1	8389.7	12312.5	10383	11142.4	-	-	1190	1	0	-	-	-	-	-
1118	M415T349	415.356	5.81808	4428.62	3936.42	4567.48	2619.51	9947.42	4828.09	3327.48	3161.43	2378.72	3735.54	3358.69	2511.97	2958.19	3014.98	2845.92	2917.43	1866.21	2191.77	2193.71	3175.37	3617.63	3637.5	3955.07	2946.18	4322.68	3620.36	2802.23	2700.16	1971.39	4112.8	3464.54	2463.48	3203.3	3135.42	4977.16	3747.58	-	-	2093	1	0	-	-	-	-	-
1119	M415T462	415.357	7.70488	17932.7	15911	19455.4	12496.2	13406.9	10972	20624.6	37282.2	17670.2	22896.8	40570.3	27085.9	13765.3	19641.6	38669.9	22003.3	8323.03	15211.7	14141.4	17876.7	15785.7	4398.31	5926.89	6082.12	20580.8	16081.8	5106.94	19611.1	24336.9	20792.6	23511.6	21736.7	21798.8	15555.3	21133.1	18312.9	-	-	2846	1	0	-	-	-	-	-
1120	M415T376	415.393	6.26462	5922.09	6831.61	8004.78	4361.48	4352.2	4537.67	1790.29	2036.97	2692.42	1492.27	1177.09	1674.02	2276.06	1342.64	2409.75	1043.71	1018.65	590.538	1700.93	2030.23	1785.33	2544.64	2611.6	2224.01	3316.25	3559.97	2667.92	2012.82	1513.78	2261.55	2918.73	2172.07	2172.35	1087.5	1130.53	1692.33	-	-	4795	1	0	-	-	-	-	-
1121	M415T384	415.434	6.40523	17585	17813.3	15684.3	4154.51	9109.43	2697.52	2006.93	2451.84	2279.42	1322.52	1664.19	3943.96	5778.51	1589.38	7774.18	1336.22	1527.94	1365.67	1498.45	1138.9	7264.99	9036.81	2133.03	1594.8	9050.36	8061.75	4438.97	16089.1	8352.06	7887.29	1557.08	8431.3	8113.67	1178.38	2540.12	2527.67	-	-	2204	0	0	-	-	-	-	-
1122	M416T602	416.273	10.0378	7680.33	8718.64	9281.06	5118.48	8631.75	9478.25	1108.7	1316.14	418.39	990.005	448.036	853.375	748.418	543.329	566.392	781.761	541.663	796.417	3879.78	1716.77	4271.95	2141.63	2652.91	2642.86	2044.46	4199.28	1730.38	2875.37	1621.76	2473.87	1170.72	1136.62	1611.09	1760.53	770.604	1536.17	-	-	1575	0	0	-	-	-	-	-
1123	M416T350	416.275	5.82808	3385.15	4287.99	3531.2	4542.31	4116.69	3091.41	3712.21	4887	4312.33	5445.62	4405.16	2672.58	5411.61	4223.6	3680.54	4323.44	4251.65	3456.67	2879.51	3961.89	2866.68	2519.15	3379.29	3343.22	3849.73	4151.15	3239.59	4185.07	4012.97	4829.93	3583.03	3363.3	4262.17	3578.36	4626.8	4324.85	[166][M+3]+	-	2078	1	0	-	-	-	-	-
1124	M416T54	416.337	0.904417	2433.04	4064.95	3066.37	3615.12	3341.68	2867.46	2598.13	1644.93	3351.62	2499.71	1563.32	1613.61	4292.34	3474.78	4237.03	6720.31	1719.6	1956.21	3235.24	3899.22	4473.65	2303.89	2838.35	2557.44	2978.32	3957.74	1989.81	2529.81	2506.05	4938.13	3692.9	3452.85	3420.74	4000.73	3260.45	2380.09	-	-	515	0	0	-	-	-	-	-
1125	M416T210	416.337	3.49353	2808.16	3043.78	2936.85	1218.55	1061.12	2411.24	1141.13	1437.76	1804.83	1356.92	917.178	1292.29	1716.04	1104.19	1329.06	549.291	1000.21	932.12	5442.53	5669.79	7244.3	4999.8	2320.61	1625.96	10112.6	8118.24	4007.28	5419.53	7549.85	4631.56	10027.9	9405.21	8977.32	5283.04	5161.96	4323.98	-	-	2418	0	0	-	-	-	-	-
1126	M416T355	416.352	5.92422	2328.13	2841.25	2915.15	3027.21	2730.26	953.498	2670.3	2181.19	2143.73	1832.69	933.581	2012.33	2148.65	1729.05	1333.31	2132.89	1860.1	1971.61	2184.59	2636.43	2393.99	2746.92	2461.68	2318.06	3126.47	2847.68	1968.01	2550	1302.12	3151.83	1855.19	2926.62	1646	2821.62	1271.22	1200.32	-	-	4060	1	1	MG 21:1	Glycerolipids	MAG	-	LMGL01010000
1127	M416T388	416.361	6.46673	3824.34	6405.4	8517.23	2754.05	3741.5	3816.44	3549.67	3917.57	2560.77	2253.22	3165.97	1798.81	2281.98	1968.59	2880.8	1414.61	1550.83	1316.86	2799.86	1800.82	2874.99	3235.96	2260.88	2239.24	3855.4	2520.54	1657.97	6773.6	3109.46	3831.8	3157.97	2837.23	3809.11	3570.23	5008.24	5205.12	-	-	1179	0	0	-	-	-	-	-
1128	M416T450	416.363	7.5056	12877.1	18042.4	11917	6786.84	11544.2	7593.49	15008.6	25848.3	9966.09	9185.97	11830.5	8118.34	18044.5	7909.71	11875.3	5195.41	5546.56	6022.61	7172.94	9419.62	8170.35	9962.18	7894.57	6855.28	9775.35	9408.85	4524.16	9120.23	6381.97	6001.25	6142.25	10773	6948.03	7485.46	4611.06	6558.39	-	-	2398	0	0	-	-	-	-	-
1129	M416T353	416.373	5.88173	4437.21	5259.87	3818.37	3830.69	5467.11	5261.52	4937.99	3586.75	4108.01	3462.46	3179.96	3693.72	3631.65	3010.75	3700.36	3422.6	3353.53	4392.4	5198.93	3331.24	3456.68	4236.69	2687.86	3645.28	5611.07	2434.44	1742.76	4479.14	3512.76	5702.78	2399.31	3240.72	2409.7	4610.13	6274.19	3963.37	-	-	3587	1	1	MG 21:1	Glycerolipids	MAG	-	LMGL01010000
1130	M417T46	417.153	0.773367	4120.2	3262.7	2912.46	2932.81	3782.2	3046.63	1817.31	1638.2	603.181	549.231	705.707	577.622	654.133	1156.16	825.044	906.081	346.152	599.472	1359.95	1214.32	1149.3	1969.81	1614.81	2010.4	993.669	1363.43	1109.08	755.905	929.207	855.939	867.293	864.085	1036.5	709.56	430.873	1030.62	-	-	4020	1	0	-	-	-	-	-
1131	M417T247	417.24	4.11215	57703.8	55647.7	57887.9	15285.9	16988.2	24617.4	1377.95	2480.37	1957.62	1516.04	1518.32	1628.57	1305.41	1027.19	1352.37	1002.26	991.422	878.615	6872.7	6705.55	7404.73	13391.5	11727.4	7222.76	6322.84	4704.37	6542.69	5089.89	4240.97	3894.25	3381.71	5665.16	2829.96	6088.61	3016.71	4362.95	-	-	4464	1	0	-	-	-	-	-
1132	M417T407	417.24	6.78142	86526	118542	132637	31776.9	40225.2	59705	1990.36	2980.4	3794.84	2200.82	3251.63	2197.09	1744.67	1851.63	3534.25	2286.54	937.456	755.219	13663.4	13434	12643.3	15320.8	18179.4	19381.3	14590	16287.2	9019.07	10798.9	10425.1	9394.38	12165.3	13592.2	14896.5	11668.2	4784.25	8283.18	-	-	983	1	0	-	-	-	-	-
1133	M417T428	417.24	7.12805	54721.8	48588.6	134367	37333.1	49342	46361.8	11125.4	3548.89	5259.11	9006.48	5528.87	3720.49	3493.16	3978.4	7288.68	5157.5	2480.83	2759.12	17336.7	38017.1	23716.7	55019.1	15738.3	26611.2	15854.3	34896.1	24120.1	13209.4	18500.4	12766.6	25097	22864.7	11659.2	13497.9	16041.6	11033.6	-	[M+H+HCOOH]+ 370.242	22	0	0	-	-	-	-	-
1134	M417T472	417.37	7.86915	2730.8	4114.33	2930.5	7417.05	5224.64	5322.1	7745.23	7961.9	7515.26	7585.83	13327.4	8213.97	6246.03	5334.54	4666.42	6331.52	12065.7	4428.4	12366.1	10202.7	9758.11	14465.4	16592.8	14658.4	10248.9	13838.7	12987.2	17214	12669.8	12539.2	10446	9304.24	10508	7601.19	8221.38	9323.83	-	-	2427	1	0	-	-	-	-	-
1135	M417T449	417.372	7.48967	12459.2	10731.2	9052.24	5546.33	6657.46	5714.45	13303.8	9270.23	13100.3	8051.89	17721.7	8344.13	11738.3	8435.67	8378.18	7372.89	7078.01	8604.59	9763.47	9826.78	10784	11898.5	9800.25	10485.9	9323.66	10911.8	6422.86	1443.2	11902.3	10996.5	7717.65	10522.1	8295.47	1124.45	4156.95	172.115	-	-	1480	1	0	-	-	-	-	-
1136	M418T425	418.244	7.08085	16913.7	22001.5	27533	12071.1	24167.9	16602.2	4061.3	2421.07	3202.6	2043.03	1453.18	2813.64	1249.1	1620.12	1431.53	3107.43	1148.31	1160.59	5435.22	8014.41	7195.18	6556.28	9353.94	15573.9	7692.42	11601.5	9729.55	6784.29	3975.4	5046.4	8284.1	6238.6	6114.52	5036.99	4295.12	3559.74	-	-	22	1	0	-	-	-	-	-
1137	M418T318	418.332	5.29358	14535.7	15365.1	13635.4	30317.9	28473.8	34565.5	5730.11	6748.7	5961.06	12140.3	9221.43	6187.77	7708.06	8173.49	12659.5	8701.69	3825.29	4832.1	3706.97	3611.74	4530.81	8200.63	6178.02	5235.11	9587.25	8278.21	7930.69	4384.24	5210.23	6255.76	6893.17	8311.5	6805.03	4900.02	4541.18	3849.44	-	[M+H]+ 417.325	380	1	1	DG 20:0; DG(8:0/12:0)	Glycerolipids	DAG	-	LMGL02010000
1138	M418T336	418.353	5.59708	4345.94	7392.06	4879.45	7970.39	11210.2	5637.24	17353.5	8548.12	9837.64	22477.3	13121.6	11572.2	32400.8	25455.5	18880.1	30192.4	24070.1	23418.4	3932.26	3673.45	5022.58	44275.2	63275	47869.4	18744.6	31712.2	51077	4589.87	3879.82	5447.33	6346.98	5336.92	4043.87	5779.22	9770.27	4568.65	[168][M]+	[M+H+NH3]+ 400.32	169	1	1	DG 20:0; DG(8:0/12:0)	Glycerolipids	DAG	-	LMGL02010000
1139	M419T46	419.17	0.772975	1802.83	2373.3	2226.78	1803.31	2322.5	1743.13	774.001	1228.28	549.562	498.253	512.767	486.778	362.109	235.644	498.663	412.37	199.462	413.387	939.555	836.308	1077.9	1352.58	1430.13	1570.69	1492.99	527.4	1036.85	416.494	1045.2	712.198	766.893	620.596	1179.1	392.082	1003.36	593.821	-	[M+Na]+ 396.172	293	0	0	-	-	-	-	-
1140	M419T454	419.256	7.56738	104661	59065.8	43342.6	124461	112618	121406	120786	71526.4	110116	98497	89616.6	106869	114954	88052.7	147837	88996.9	39864.1	46104.3	49880.6	51370	56369.1	38370.2	60325.9	65225.3	52221.2	66836.5	63237.9	28563.7	46669.6	25438.4	24787.9	16320.4	35609.7	53371.1	34207.6	36382.1	[169][M]+	-	1113	1	0	-	-	-	-	-
1141	M419T267	419.256	4.44623	31996.7	32313.8	30808	46904.7	35759.4	43378.8	23412.3	27192.9	21765.7	26927.5	22513.2	19699.7	13522.3	17516.7	19446.5	16625.1	6132.29	10015.1	19184.2	20831.9	21224.1	28431.4	27064.3	30491.9	22407.4	17727	18854.4	13831.4	11796.9	6805.97	7753.71	7537.98	11263.3	16767.9	11046.7	17136.1	[170][M]+	-	408	1	0	-	-	-	-	-
1142	M419T430	419.256	7.16349	62218.4	53984.2	43398.1	31152.8	50083.6	44626	22215.3	20268.8	22298	23626.2	21482.5	20488.5	20293.6	20899.3	20324.8	21708.3	17716.2	18236.2	25270.3	24950.6	26630.6	16373.3	21550.4	32034.6	21959.1	22564.5	16547	16693.5	16340.4	11537.3	12286.1	16562.9	23150.6	18592	13156.7	12868.4	-	-	46	1	0	-	-	-	-	-
1143	M419T377	419.316	6.29056	363747	462541	351795	349395	448469	166342	431334	308012	303519	419384	143480	158970	427459	152772	333187	161819	318210	141674	354003	167311	440945	165608	214584	395474	395174	326552	322586	302539	313150	428281	176350	315469	322024	177087	422892	314591	[171][M]+	-	1900	1	0	-	-	-	-	-
1144	M419T336	419.356	5.59812	1741.83	2769.69	2016.12	2000.55	9666.09	4530.23	5300	3248.51	2883.66	7474.56	3354.55	3586.5	9003.22	7873.83	6594.85	8112.35	7291.85	6847.55	1619.8	1591.75	2504.62	13236.8	16898.7	14280.6	6175.78	9973.07	14427.9	1636.54	1644.51	2166.87	3008.39	2576.49	1964.76	1853.07	2813.92	1718.58	[168][M+1]+	-	2993	1	0	-	-	-	-	-
1145	M420T455	420.259	7.5769	17981.5	33013.6	16614.6	50351.8	30978.8	38595.7	37760.7	20613.5	29578.5	23576	28796.4	26447.6	23919.1	23943.4	39847.5	25752.4	14061.7	18731.1	22262.1	17185.5	23312.2	22488.7	14666.8	21490	10456.4	14321.6	11201.8	3806.25	15779.5	8201.47	6213.76	10703.6	7519.4	12755.1	9084.82	11304.8	[169][M+1]+	-	1117	1	0	-	-	-	-	-
1146	M420T267	420.258	4.4455	8647.51	11037.1	7901.61	17154.7	10975.4	14598.6	8748.39	6982.39	6654.85	7616.3	5841.86	4515.3	6705.2	4476.29	5772.85	5231.06	2287.5	2919.28	2545.85	5560.69	5457.73	6636.43	9359.54	11839.8	3940.86	7953.29	5549.28	4537.72	5218.34	4327.14	5234.52	4912.34	4411.04	3691.68	2978.54	6204.2	[170][M+1]+	-	408	0	0	-	-	-	-	-
1147	M420T377	420.319	6.28938	114444	66118.1	54204.3	107446	154066	77764.9	65393.5	100707	105121	75992.2	55215	45477.1	73522.9	51134.4	98790.6	107778	102991	44508.5	98641.2	97661.5	74761.3	48330.2	133312	103106	129197	42322.2	104857	94621.6	46188.5	131761	90651.2	98415.6	99456.1	92654.5	144451	96050.2	[171][M+1]+	-	1901	0	0	-	-	-	-	-
1148	M420T342	420.346	5.70133	4737.14	4722.39	5891.38	8835.96	8512.94	11864.5	1967.39	4396.03	1145.98	3115.83	2718.32	2986.62	2627.05	1898.67	3494.49	2134.95	1776.68	2327.19	2830.72	3350.44	3830.58	2866.51	3531.82	3212.51	4736.89	3493.28	3111.06	5760.38	6047.43	4305.49	9414.01	6246.37	5356.02	3791.35	3018.39	3413.35	-	-	4323	0	0	-	-	-	-	-
1149	M420T371	420.404	6.178	3289.47	4925.64	3860.19	3092.77	4563.53	3525.41	4816	2785.52	3259.12	4395.2	3502.8	3018.24	4055.44	3026.47	3002.54	3279.72	3616.38	3422.24	2761.4	3891.98	4785.55	2686.07	5266.98	3896.97	5219.74	3094.12	3544.47	3858.36	2610.29	4136.47	3426.55	3532.36	3409.2	2981.35	3711.89	3781.72	-	-	2064	0	0	-	-	-	-	-
1150	M421T336	421.248	5.60059	4433.74	5755.82	4516.37	4030.73	5422.58	4319.81	5311.87	4666.37	3795.2	5468.73	4115.79	4582.93	5706.01	3818.19	4736.65	4067.15	4116.43	4162.21	3671.34	4270.46	4951.74	3589.25	5663.67	4744.8	4631.41	5048.04	4102.02	4228.97	4369.77	4961.71	4846.81	4026.75	4072.11	4381.34	4444.37	4414.96	[172][M]+	-	2976	0	0	-	-	-	-	-
1151	M421T459	421.269	7.6518	24570.8	24365.9	20990.3	13316.4	13728.5	13937.4	7799.13	3384.9	8595.4	8192.8	6102.49	8368.98	5616.22	6123.62	9487.2	6417.47	3102.55	4211.37	7337.8	9445.09	10380.4	9230.37	8753.79	10151.6	5111.6	8040.86	3657.82	6978.59	5700.25	5970.43	5398.17	4278.13	7646.72	4711.36	5903.38	6184.44	-	-	1507	1	0	-	-	-	-	-
1152	M421T288	421.272	4.80642	7457.4	7091.74	5950.97	4587.85	4513.74	5399.63	2661.89	1889.05	1590.61	3112.07	2354.32	2195.01	1590.09	1617.8	2343.6	2386.77	1337.33	1364.25	4461.77	5604.07	5544.27	3071.52	4540.51	4302.4	4961.01	2951.6	3058.41	3892.04	2654.44	4690.12	3901.99	3331.24	3702.04	4087.91	2923.25	2956.09	-	-	2961	1	0	-	-	-	-	-
1153	M421T323	421.292	5.37662	19575.7	22109.5	25232.5	3644.07	8372.72	12324.8	3508.33	1987.37	2297.19	3696.31	3312.09	1912.81	2444	2272.19	2101.69	2401.74	2234.17	1687.17	1866.9	2521.14	1268.95	2346.89	2324.95	2545.02	2253.51	1710.29	1151	2395.28	2513.11	2370.46	2852.05	2935.21	2244.87	2485.73	2266.42	1852.27	-	-	4480	0	0	-	-	-	-	-
1154	M421T378	421.325	6.29894	12633.9	28236.3	11205.7	21075.5	37485.7	26215.6	29020	15113.9	33727.5	23416.2	24002.3	15628.3	33229.3	23494.4	24469.1	15996.2	23322.3	9839.73	16834.7	16582.6	25667.2	11828.2	14373.5	6927.54	23110	16050.2	15821.6	19917.1	23958.3	7055.76	32270.5	23496.6	24404.6	10516.1	27620.2	25521.7	-	-	4109	1	0	-	-	-	-	-
1155	M421T276	421.352	4.60675	9738.11	7701.75	8785.23	11646.1	6047.07	8783.53	11161.4	13851.1	13826.9	20900.8	7603.13	13349.5	15077.6	10336.7	10172.8	12942.7	9799.64	11363.9	11162.3	10779.3	13467.5	10990.4	12721.2	9698.47	12997.8	18554.4	11768.9	17144.1	12127.6	15647.3	6232.4	7692.2	10065.3	13216.4	10307.3	9480.68	-	-	3025	0	0	-	-	-	-	-
1156	M422T336	422.252	5.59812	1387.47	2254.58	2154.03	2116.68	1749.31	1824.09	1653.91	1714.17	1528	2518.54	1474.17	1231.16	2166.65	1907.56	1296.11	1397.76	1142.88	1633.25	1601.38	1429.17	1823.87	1768.78	2215.75	2733.13	1252.22	2080.25	1585.38	1585.79	1540.74	1639.45	2608.49	2128.85	1662.51	1748.42	1799.1	660.192	[172][M+1]+	-	2976	1	0	-	-	-	-	-
1157	M422T67	422.311	1.10862	557.495	885.516	838.494	853.475	1215.05	1266.64	691.272	569.248	696.902	682.061	528.208	546.018	618.118	638.404	679.916	718.63	584.489	448.362	1020.08	1097.1	916.76	842.69	688.059	707.569	1040.93	1027.61	765.6	845.701	815.764	773.27	1049.9	1003.43	952.817	1081.74	1104.46	789.051	-	-	4433	0	0	-	-	-	-	-
1158	M422T350	422.327	5.83029	7119.2	8488.81	5851.1	5349.11	6942.94	4701.6	7315.28	5340.03	3315.97	10826.7	6087.43	5169.48	7134.27	5455.95	4158.88	4978.65	4283.97	3757.71	4933.99	3201.6	3793.43	4776.46	5059.2	6238.89	4084.29	4585.47	5182.47	6044.18	6274.28	7160.63	5520.73	5442.8	6948.67	7276.3	8602.97	8104.4	-	-	2104	1	0	-	-	-	-	-
1159	M422T278	422.354	4.62727	3815.34	3567.48	3836.06	3232.18	4352.03	2654.14	2256.39	3639.54	2618.4	4414.38	2149.63	3105.57	4904.95	3077.84	3187.95	2332.9	2338.36	2472.49	3658.22	3185.41	4093.47	2859.35	3268.28	3649.62	6775.02	3961.06	5442.55	4816.3	2324.07	1492.64	2424.67	4279.28	2809.51	2935.81	4346.77	4018.48	-	-	3396	0	0	-	-	-	-	-
1160	M422T366	422.397	6.10192	3275.58	3314.71	2823.84	3186.67	5396.66	3699.21	3853.59	5052.95	3993.64	5673.14	4977.25	3765.26	5036.25	4093.72	3702.02	4131.77	3596.06	3298.46	4296.06	3941.35	4587.12	2465.83	4648.01	3024.8	2947.65	2516.2	2586.84	2777.25	2887.55	4479.59	4182.4	2972.95	4328.71	2839.43	5371.36	3466.83	-	-	460	1	0	-	-	-	-	-
1161	M423T994	422.882	16.5712	6666.62	9247.11	8246.07	9509.73	8863.7	7312.14	5625.94	7220.15	7615.2	6983.55	4353.98	7346.35	8621.98	8289.29	10117.3	9202.08	7016.96	8992.41	12336.3	5383.37	8591.67	9138.81	7316.09	8366.68	7499.86	5668.3	7085.14	3813.82	9925.74	7905.23	7478.32	8094.7	9813.06	7595.62	7123.77	6269.65	-	-	4715	0	0	-	-	-	-	-
1162	M423T172	423.215	2.85842	895.178	837.081	680.463	1073.12	781.55	867.663	467.574	829.707	861.853	436.73	791.602	1287.88	471.709	603.291	1674.12	495.333	692.778	605.357	1071.51	1682.35	1059.48	1006.41	1214.56	1209.05	645.543	880.949	1260.71	3707.09	2984.35	2363.13	2363.28	2212.82	2443.71	1801.94	1675.73	3227.77	-	-	532	1	0	-	-	-	-	-
1163	M423T351	423.245	5.85602	853.447	1097.27	1131.44	2985.95	1727.76	2679.77	2027.91	2161.76	1550.36	1903.28	1467.21	1058.95	1135.69	2067.78	1120.73	1191.16	1347.18	1621.5	1981.47	1498.24	3086.34	2927.62	3578.84	4553.56	1830.78	2238.27	2157.81	1145.36	833.404	1556.23	986.86	771.223	1332.78	740.499	596.166	1360.96	-	-	3576	1	0	-	-	-	-	-
1164	M423T207	423.273	3.4527	1186.15	1355.61	1055.68	2472.63	1583.81	1258.79	1332.98	2002.39	1422.28	1712.54	1460.25	1804.24	1230.44	995.943	659.795	890.016	823.057	1028.72	1883.02	3044.8	3131.5	2961.71	3378.19	2530.66	1757.65	3504.72	2612.4	3286.49	5033.14	4812.69	1708.73	4494.25	3618.26	2414.52	3548.86	3009.3	-	-	2922	1	0	-	-	-	-	-
1165	M423T336	423.309	5.59637	52423.6	72927.4	49305.5	74497.9	93140.4	53440.6	143494	82762.1	83573.9	194012	130317	106447	269661	179935	152914	254133	206029	199771	30650.9	36231.6	43523.6	370934	465570	357185	131138	276583	383365	37741.7	36802.4	52693	50037.9	41369.9	35116.4	49583.2	61307.1	45429.7	[173][M]+	[2M+Na]+ 200.146 [M+Na]+ 400.32	169	1	0	-	-	-	-	-
1166	M423T321	423.362	5.35237	741.082	3379.94	1049.27	1279.47	1043.51	805.481	1883.56	2133.46	2159.61	1685.89	1912.5	2224.25	1637.59	1774.98	3239.1	2012.29	1865.22	2551.28	3523.66	3901.64	3713.69	4964.43	3877.11	3729.73	5503.02	3774.8	4953.06	2807.39	4780.86	4966.62	3505.28	3645.31	2915.19	5185.71	3054.09	3072.8	-	-	4630	1	0	-	-	-	-	-
1167	M423T657	423.362	10.9423	12616.7	14084.2	12497.6	1028.85	1590.63	1296.82	1269.3	2118.66	477.688	533.715	6745.2	1265.31	670.321	645.338	1664.55	824.593	2724.74	829.373	1471.68	2215.67	1986.16	3398.45	1537.75	1710.9	2406.62	2221.83	1898.26	9747.71	2276.03	2244.56	2466.56	1194.18	1381.25	5466.56	2009.87	3482.09	-	-	2124	1	0	-	-	-	-	-
1168	M423T761	423.398	12.6834	58617.6	66646.8	59479	4980.29	6121.46	4904.8	1342.02	8885.12	1749.63	3298.4	11148.8	4399.17	403.362	338.157	3960.84	1354.76	5792.02	1657.61	3689.63	5665	4201.61	4878.48	11767	9275.77	8324.59	10220.1	3503.24	14719.4	10021.9	8221.8	6771.91	3790.69	4959.49	9354.24	2220.54	7127.04	-	-	1092	1	0	-	-	-	-	-
1169	M423T366	423.4	6.10137	3231.64	3245.85	2921.56	2624.84	2710.91	2320.12	1736.21	1187.26	1694.16	1754.59	1145.42	1192.6	2182.85	1392.76	1353.55	1702.39	1420.83	1043.64	1593.53	1084.51	1402.45	1878.37	1107.28	577.672	990.583	1728.34	1435.72	1977.12	1808.38	2377.23	1745.6	1307.97	1462.61	1433.44	1321.27	2281.24	-	-	4769	1	0	-	-	-	-	-
[truncated: 6,402 more rows]
[truncated: 6 more columns]
